# Supplementary material for: Physiological and genetic convergence supports hypoxia resistance in high-altitude songbirds
Source: PLoS Genet. 2020 Dec 28;16(12):e1009270. doi: 10.1371/journal.pgen.1009270 (PMC7793309; doi:10.1371/journal.pgen.1009270)
Supplement: S2 Data — (XLSX) [file pgen.1009270.s015.xlsx]

## Sheet: Pa.mo(H) VS. Pa.mo(L)
Gene_id	Gene_name	baseMean	log2FoldChange	lfcSE	stat	pvalue	padj
PMO003293	T11L1	80.3159	-3.15082	0.38201	8.27038	1.33534e-16	3.03255e-13
PMO012036	GPC5C	8.48296	-2.86675	0.386719	6.87612	6.15039e-12	3.1039e-09
PMO005560	PTHD3	54.9271	-2.32501	0.270627	8.53439	1.40891e-17	8.94475e-14
PMO002303	LGMN	180.091	-2.29376	0.337939	6.76759	1.30948e-11	5.94766e-09
PMO004573	IF2B2	16.8097	-2.24334	0.30317	7.28293	3.26655e-13	2.28257e-10
PMO013226	SOCS2	7.55854	-2.10556	0.371783	5.52728	3.25228e-08	3.93917e-06
PMO010037	MT21C	95.5213	-2.07943	0.364158	5.70303	1.177e-08	1.75276e-06
PMO007249	MYLK2	17.4089	-2.07186	0.396302	5.27982	1.29309e-07	1.24962e-05
PMO006795	5NTC	188.71	-2.04394	0.314273	6.48834	8.67882e-11	2.91994e-08
PMO012549	CTNS	42.211	-2.01705	0.364025	5.52918	3.21728e-08	3.93917e-06
PMO004860	EAA2	7.08456	-1.99188	0.397299	4.80928	1.51477e-06	9.30339e-05
PMO010976	FRIH	38.0743	-1.9581	0.398987	4.99683	5.82794e-07	4.20167e-05
PMO006035	VNN2	28.4044	-1.93623	0.378288	5.11328	3.16615e-07	2.61466e-05
PMO008607	UPP	141.874	-1.91934	0.314408	6.08851	1.13966e-09	2.52505e-07
PMO013921	PGDH	22.1444	-1.90468	0.360854	5.2352	1.64806e-07	1.4971e-05
PMO001829	P20D2	252.855	-1.8749	0.265013	7.06243	1.63612e-12	9.28908e-10
PMO009199	GLNA	2567.87	-1.85118	0.315015	5.86605	4.46293e-09	7.94927e-07
PMO004250	OSER1	243.862	-1.82993	0.325	5.62155	1.89248e-08	2.56586e-06
PMO007784	TNR1A	5.89426	-1.82274	0.363468	4.86297	1.15639e-06	7.6463e-05
PMO003448	UN13A	41.269	-1.80499	0.266357	6.7461	1.51877e-11	6.27113e-09
PMO002512	MLRN	124.988	-1.79707	0.292351	6.14046	8.22851e-10	1.86869e-07
PMO004018	TRXR1	4.30378	-1.79191	0.386374	4.49843	6.84557e-06	0.000318898
PMO010121	LAAT1	41.9612	-1.77881	0.368284	4.83732	1.31601e-06	8.47845e-05
PMO006885	RAP2B	8.49136	-1.77117	0.306573	5.66317	1.48606e-08	2.17732e-06
PMO002532	CIDEA	24.5287	-1.77112	0.341487	5.16788	2.36767e-07	2.06807e-05
PMO000091	SNX29	24.2119	-1.77039	0.376644	4.69789	2.62861e-06	0.000150178
PMO012417	BORG4	61.1233	-1.76568	0.315001	5.58008	2.40408e-08	3.07586e-06
PMO004324	LIPE	23.0988	-1.75288	0.346071	5.01885	5.19829e-07	3.87059e-05
PMO000614	TWF2	272.04	-1.74263	0.293861	5.91947	3.22978e-09	6.24241e-07
PMO012877	VEGFD	205.655	-1.73616	0.37065	4.67449	2.94686e-06	0.000166269
PMO009016	TRFM	10.8494	-1.7341	0.3818	4.528	5.95433e-06	0.000286186
PMO013481	BTG1	172.843	-1.70629	0.289691	5.88147	4.06635e-09	7.38774e-07
PMO001925	HAUS6	51.6089	-1.69887	0.368103	4.60377	4.14917e-06	0.000217867
PMO009978	EKI2	9.00486	-1.69792	0.377872	4.42774	9.52273e-06	0.000421973
PMO005286	TALDO	343.076	-1.67285	0.33883	4.9277	8.32016e-07	5.76949e-05
PMO013259	CRADD	10.2212	-1.65761	0.363187	4.51627	6.29384e-06	0.000297777
PMO014412	IL6RA	210.611	-1.65713	0.307596	5.37865	7.50462e-08	8.11571e-06
PMO011746	AMPD3	553.858	-1.65655	0.369045	4.4775	7.55228e-06	0.000345922
PMO015956	BAHD1	83.895	-1.65275	0.244169	6.75728	1.40605e-11	6.08217e-09
PMO011500	ALS2	330.229	-1.65074	0.279904	5.88917	3.88138e-09	7.1956e-07
PMO009892	BNIP3	1606.37	-1.6487	0.25874	6.36669	1.93151e-10	5.65994e-08
PMO000348	GP146	53.0475	-1.64051	0.302555	5.3972	6.76883e-08	7.49854e-06
PMO002517	PSMG2	81.8368	-1.63946	0.321624	5.08963	3.58766e-07	2.90985e-05
PMO005974	KIF25	1.9306	-1.63896	0.400423	3.96904	7.21635e-05	0.00208769
PMO015854	TSCOT	4.79758	-1.63848	0.396892	3.99959	6.34527e-05	0.00187754
PMO003922	DCOR	61.2901	-1.60454	0.306437	5.22525	1.73917e-07	1.56422e-05
PMO013009	AK1BA	19.141	-1.60419	0.380918	4.18067	2.9065e-05	0.00104358
PMO013733	SNX16	53.417	-1.59972	0.295419	5.40087	6.63195e-08	7.43761e-06
PMO009365	SNTB1	47.51	-1.59198	0.348451	4.53457	5.77213e-06	0.000281286
PMO005203	ZN628	26.2328	-1.57842	0.327024	4.81095	1.50216e-06	9.30339e-05
PMO016522	DGAT2	4516.6	-1.57539	0.32619	4.82057	1.43151e-06	9.09359e-05
PMO002792	STA5B	547.12	-1.57046	0.287666	5.45292	4.95497e-08	5.77063e-06
PMO007177	MT1	8.01474	-1.56386	0.396577	3.98915	6.63096e-05	0.00194937
PMO003841	UTP23	43.2546	-1.55945	0.310285	5.01971	5.17494e-07	3.87059e-05
PMO007592	RSLBA	38.6476	-1.55782	0.384604	4.03756	5.40099e-05	0.00162999
PMO013172	BRX1	192.996	-1.5547	0.312557	4.96689	6.80349e-07	4.79092e-05
PMO000176	ZFN2B	368.05	-1.5339	0.346949	4.41207	1.02385e-05	0.000445007
PMO002163	LEG3	5.01761	-1.52943	0.373581	4.02309	5.74383e-05	0.00172201
PMO004476	CATB	960.189	-1.52808	0.290403	5.25519	1.47872e-07	1.37068e-05
PMO013979	LMOD2	53.7253	-1.52564	0.391325	3.91481	9.04741e-05	0.00247807
PMO012644	SETD6	20.1955	-1.51216	0.365117	4.15061	3.31589e-05	0.00114531
PMO001423	MUTYH	4.21636	-1.50416	0.355899	4.12168	3.76119e-05	0.00125541
PMO012425	CHMP6	70.4234	-1.48966	0.263124	5.65025	1.60214e-08	2.23905e-06
PMO000801	IGDC3	3.94468	-1.48178	0.39519	3.73842	0.000185184	0.00418461
PMO006627	NO66	244.953	-1.47233	0.309842	4.74221	2.11395e-06	0.000124695
PMO011638	CNPD1	395.113	-1.47019	0.261455	5.61785	1.93351e-08	2.58295e-06
PMO000701	KPCD	22.4313	-1.46146	0.37331	3.90175	9.55016e-05	0.00255911
PMO002204	SMYD2	43.3536	-1.45578	0.376018	3.85904	0.000113832	0.0029161
PMO006501	TMM43	53.4296	-1.44992	0.27472	5.27006	1.36379e-07	1.29049e-05
PMO014986	FBX6	24.6711	-1.44651	0.343652	4.19274	2.75608e-05	0.00100953
PMO007711	TNF6B	4.75238	-1.43662	0.396296	3.558	0.000373696	0.00732728
PMO001336	PHF13	22.2161	-1.4272	0.324014	4.39683	1.09842e-05	0.000464093
PMO010934	GLMPA	288.844	-1.42628	0.302906	4.70024	2.59855e-06	0.0001494
PMO005687	SSRB	19.6255	-1.41858	0.367834	3.85515	0.000115659	0.0029451
PMO001626	TO4AA	30.2629	-1.40377	0.302604	4.61921	3.8521e-06	0.000204634
PMO009388	RMD5A	483.254	-1.40237	0.23044	6.0823	1.18471e-09	2.56235e-07
PMO013971	PIM3	168.019	-1.389	0.290735	4.76901	1.85129e-06	0.000110639
PMO004083	MMP9	10.7013	-1.38563	0.393629	3.49301	0.000477602	0.00876473
PMO000383	ERF3A	356.596	-1.37743	0.253715	5.42608	5.76065e-08	6.54122e-06
PMO003071	PSMD3	845.958	-1.37606	0.300261	4.57706	4.71548e-06	0.000240649
PMO007638	RAB30	42.9839	-1.37287	0.301759	4.53668	5.71458e-06	0.000281286
PMO014268	B3A2	147.143	-1.36822	0.268539	5.09058	3.56969e-07	2.90985e-05
PMO006640	SPTN5	14.8742	-1.36032	0.308352	4.38982	1.13446e-05	0.000474906
PMO010556	RD23B	283.493	-1.35144	0.330653	4.07868	4.52927e-05	0.00144364
PMO009829	LIMK1	16.7247	-1.34784	0.327836	4.08092	4.48584e-05	0.00143991
PMO015898	MARE3	55.4521	-1.34679	0.326634	4.12025	3.78466e-05	0.00125541
PMO009034	IRS1	73.0696	-1.34467	0.344	3.88915	0.000100596	0.00265643
PMO004311	ARI5A	389.096	-1.34304	0.330566	4.0555	5.00265e-05	0.0015563
PMO013641	WRP73	29.3339	-1.33772	0.287488	4.65255	3.27854e-06	0.000179411
PMO001789	SRR1L	14.6319	-1.33299	0.356813	3.71069	0.000206695	0.00456841
PMO000326	TFAP4	38.9587	-1.33288	0.235427	5.65259	1.58046e-08	2.23905e-06
PMO008361	ASPP2	41.61	-1.32968	0.277488	4.77482	1.79866e-06	0.000108205
PMO010036	KDEL1	13.0685	-1.32961	0.341666	3.89818	9.69169e-05	0.0025818
PMO015879	NPC1	240.158	-1.32771	0.302343	4.38383	1.1661e-05	0.000483692
PMO003562	CIR1A	115.51	-1.31577	0.282285	4.65285	3.27371e-06	0.000179411
PMO007754	F131B	15.4966	-1.31535	0.322292	4.05899	4.92862e-05	0.00153854
PMO007282	TPX2B	25.3131	-1.31177	0.368045	3.56571	0.000362876	0.00722011
PMO003852	TRIB1	160.072	-1.30437	0.315604	4.12422	3.71987e-05	0.00125153
PMO015570	TMOD1	221.663	-1.29657	0.286116	4.52859	5.93775e-06	0.000286186
PMO012472	S39AB	13.3598	-1.29444	0.313265	4.10228	4.09097e-05	0.00133198
PMO006385	ADA1B	20.1318	-1.29326	0.326032	3.95445	7.67123e-05	0.0021845
PMO006565	U3IP2	19.1246	-1.29182	0.349619	3.69222	0.000222306	0.00484276
PMO000270	WIPI2	337.079	-1.29113	0.303294	4.25232	2.11565e-05	0.000790888
PMO009582	CDK1	1.9131	-1.28958	0.394617	3.56671	0.000361497	0.00721722
PMO007052	FBXL4	123.904	-1.28786	0.371667	3.45071	0.000559116	0.0099006
PMO009012	HES1B	19.1507	-1.28519	0.370846	3.44263	0.000576081	0.0101221
PMO007456	IL1R2	2.44754	-1.28028	0.388551	3.34089	0.000835095	0.0133088
PMO001573	S46A3	194.692	-1.2787	0.382079	3.33607	0.000849706	0.0135179
PMO009748	KCD20	414.124	-1.27621	0.241917	5.27266	1.34463e-07	1.28575e-05
PMO006108	WDR43	95.6259	-1.27502	0.252931	5.04081	4.63567e-07	3.56269e-05
PMO004113	PSD11	346.019	-1.27222	0.248317	5.12052	3.04695e-07	2.53932e-05
PMO010878	S35F6	60.9651	-1.27197	0.337123	3.76709	0.000165163	0.00384703
PMO006668	FCF1	18.783	-1.26996	0.260702	4.8574	1.18937e-06	7.71728e-05
PMO012930	K0930	112.456	-1.26879	0.352475	3.58718	0.000334279	0.00677811
PMO000544	BTD	39.6386	-1.26803	0.396293	3.18231	0.00146106	0.0205453
PMO000221	CCNF	4.98601	-1.26541	0.368957	3.43101	0.000601344	0.0103073
PMO002152	TRAF3	14.8043	-1.25993	0.399087	3.15703	0.00159383	0.0216094
PMO003423	SUCO	206.147	-1.25848	0.315836	3.97614	7.00431e-05	0.00203282
PMO006270	PDE8A	9.52595	-1.25761	0.35027	3.57029	0.000356579	0.00715048
PMO012751	FOXD2	104.029	-1.25687	0.319428	3.92516	8.66721e-05	0.00241512
PMO012668	CBLN1	2.45437	-1.24573	0.400567	3.00986	0.00261369	0.0308347
PMO009256	MINA	33.261	-1.24535	0.353865	3.51774	0.000435235	0.00820264
PMO011738	GPD1L	19.2986	-1.23881	0.397364	3.10928	0.00187544	0.0244076
PMO003344	DYH5	2.4704	-1.23808	0.400143	3.04136	0.0023551	0.0288715
PMO008232	RCL1	201.598	-1.23553	0.281864	4.37943	1.18992e-05	0.000489962
PMO014158	TRI63	8869.23	-1.23123	0.302448	4.06588	4.78515e-05	0.00150931
PMO004843	FXL17	40.2479	-1.2299	0.348085	3.51466	0.000440313	0.00824525
PMO010182	ACOX3	28.0957	-1.22473	0.348147	3.50522	0.000456223	0.00842343
PMO011963	PPCT	6.36431	-1.2246	0.376782	3.24863	0.00115962	0.017277
PMO012099	ARGI2	12.928	-1.21962	0.371528	3.28949	0.00100371	0.0155062
PMO008410	WDR26	205.947	-1.21835	0.269488	4.51757	6.25534e-06	0.000297505
PMO008097	MAFF	68.2232	-1.21222	0.382134	3.15305	0.00161575	0.0218415
PMO014250	AP3M2	25.5141	-1.21169	0.227347	5.31509	1.06607e-07	1.05262e-05
PMO003223	FBX31	591.401	-1.2078	0.342844	3.51417	0.000441126	0.00824525
PMO002576	CEP85	1249.8	-1.20644	0.238838	5.04909	4.43912e-07	3.47629e-05
PMO004995	TUTLA	185.928	-1.20613	0.311585	3.86233	0.000112311	0.00289018
PMO003671	WDR75	67.2088	-1.20303	0.230778	5.21096	1.87868e-07	1.67313e-05
PMO013213	TBC15	393.339	-1.19937	0.22889	5.23793	1.62385e-07	1.49001e-05
PMO010242	NUP54	51.6247	-1.19482	0.260621	4.58552	4.52851e-06	0.000233205
PMO010426	TERA	1412.54	-1.19364	0.305692	3.89996	9.62096e-05	0.00257049
PMO007419	RAB20	7.31565	-1.19364	0.394063	3.05604	0.00224282	0.0279476
PMO003563	CADH1	56.2233	-1.18916	0.316775	3.75327	0.000174544	0.00399064
PMO013110	AVID	1.70529	-1.1855	0.399767	2.86396	0.00418382	0.0422757
PMO003854	MYC	77.1084	-1.18158	0.321855	3.66613	0.000246248	0.00530293
PMO006287	CHD2	308.743	-1.1814	0.256099	4.61047	4.01757e-06	0.000212184
PMO001556	CATC	1074.22	-1.18059	0.301913	3.90544	9.40533e-05	0.0025428
PMO011745	CTR9	373.139	-1.17995	0.28621	4.11919	3.80199e-05	0.0012559
PMO009995	TRFE	112.309	-1.17405	0.385276	3.03528	0.00240315	0.0293812
PMO009727	S41A1	56.4385	-1.17168	0.333594	3.49704	0.000470443	0.00866837
PMO009121	VPS54	65.2276	-1.16851	0.358256	3.25325	0.00114094	0.0171471
PMO001850	ZN451	39.6687	-1.16446	0.234774	4.94789	7.50232e-07	5.24239e-05
PMO006672	ZC21C	2.05386	-1.16359	0.396111	2.8953	0.00378796	0.039965
PMO007201	PTN1	28.011	-1.15707	0.323619	3.56155	0.000368677	0.00726478
PMO001090	TM180	32.0498	-1.15696	0.321212	3.60129	0.000316636	0.00649283
PMO015286	TNR21	1472.81	-1.15332	0.280455	4.10836	3.98475e-05	0.00130207
PMO003415	PRRX1	4.4376	-1.15326	0.379792	3.03168	0.00243197	0.0295348
PMO009398	LST2	14.1125	-1.15194	0.307414	3.73154	0.000190316	0.00426873
PMO003184	RF12A	1302.28	-1.14858	0.260276	4.41028	1.03239e-05	0.000446336
PMO002596	NLS1	8.49528	-1.14777	0.382676	2.94986	0.00317921	0.0354467
PMO007717	F110A	12.5439	-1.14732	0.384292	2.93185	0.00336946	0.0368329
PMO006580	HEM1	3356.48	-1.1473	0.321458	3.56356	0.000365861	0.00725651
PMO015388	PSB3	195.342	-1.14545	0.345806	3.30649	0.000944715	0.0147707
PMO009205	UCK2	89.8451	-1.14542	0.33767	3.38456	0.000712918	0.0117963
PMO006886	ARHGQ	9.4291	-1.14184	0.333523	3.40585	0.000659594	0.0110753
PMO001265	NAA25	66.9332	-1.14062	0.272694	4.17481	2.98238e-05	0.00106243
PMO006926	S12A9	17.9929	-1.14043	0.312232	3.62834	0.000285245	0.00592944
PMO002318	NUP62	102.915	-1.13753	0.281179	4.04521	5.22765e-05	0.00159356
PMO001334	PSMD2	2082.64	-1.13731	0.314921	3.60651	0.000310343	0.00639264
PMO000508	CUBN	4.36147	-1.13718	0.378102	2.94122	0.00326919	0.0360404
PMO006355	FAF2	102.245	-1.13396	0.25658	4.41937	9.8989e-06	0.000432316
PMO006783	PPRC1	61.2092	-1.1286	0.224229	5.02506	5.03265e-07	3.80971e-05
PMO010238	SAS10	193.299	-1.12792	0.301547	3.73876	0.000184931	0.00418461
PMO002830	HEPH	165.93	-1.12711	0.270418	4.16418	3.12469e-05	0.00110446
PMO008122	3BP1	3.75724	-1.12673	0.384248	2.9197	0.00350368	0.037755
PMO001948	HMDH	51.0498	-1.1267	0.361929	3.09551	0.00196474	0.0251023
PMO016054	H101	116.618	-1.12663	0.268495	4.19165	2.76931e-05	0.0010103
PMO000155	TV23A	1.73517	-1.12396	0.399726	2.89775	0.00375847	0.0397925
PMO000911	KCT2	33.8864	-1.1225	0.260994	4.29591	1.73975e-05	0.000666833
PMO012134	AMRA1	128.648	-1.11811	0.1987	5.62332	1.87323e-08	2.56586e-06
PMO009991	TBCC1	47.8939	-1.11778	0.276696	4.03663	5.4224e-05	0.00163103
PMO011876	TIAM2	3.81616	-1.11404	0.372923	2.93099	0.00337884	0.0368468
PMO006925	IF4E2	63.5734	-1.11208	0.289987	3.83448	0.000125832	0.00313166
PMO000008	ERN2	35.5401	-1.11164	0.357184	3.09829	0.00194639	0.024938
PMO010256	M3KCL	10.841	-1.11163	0.39151	2.8445	0.00444809	0.04392
PMO000865	IL16	3.28348	-1.1107	0.384824	2.81261	0.00491406	0.0470045
PMO007814	MBOA5	78.2082	-1.10842	0.333991	3.31864	0.000904556	0.0142162
PMO000656	PSMD6	779.262	-1.10768	0.311834	3.54793	0.000388266	0.00755249
PMO002018	CTC1	24.2721	-1.10507	0.276371	4.00184	6.28507e-05	0.0018658
PMO007245	SRXN1	30.6843	-1.10344	0.350394	3.12662	0.0017683	0.0233477
PMO001345	PSMD1	1008.04	-1.10157	0.28065	3.9222	8.77431e-05	0.00242267
PMO003241	ETS2	18.2151	-1.10045	0.31723	3.46173	0.000536723	0.00957877
PMO012657	CP070	50.5579	-1.10042	0.266426	4.12012	3.78667e-05	0.00125541
PMO003565	GAS8	5.71995	-1.09992	0.373698	2.96198	0.00305663	0.0344925
PMO015485	DHB11	51.1162	-1.09966	0.342586	3.21083	0.00132353	0.0191143
PMO003132	PSB2	330.988	-1.09906	0.294538	3.72833	0.000192754	0.00431275
PMO010678	ZCHC7	3.41253	-1.09803	0.384574	2.81669	0.00485217	0.0466425
PMO011635	PTPRN	11.4114	-1.09736	0.393383	2.82703	0.00469813	0.0455473
PMO004145	IKBZ	5.31507	-1.09723	0.345675	3.13665	0.00170887	0.0227616
PMO012580	LAT4	88.8676	-1.09159	0.285791	3.81251	0.000137561	0.00334119
PMO003279	CAF1B	16.5444	-1.08995	0.345448	3.15811	0.00158798	0.0215946
PMO001003	KC1A	368.096	-1.08556	0.300371	3.61068	0.000305394	0.00630499
PMO003960	FRIH	6521.24	-1.08174	0.322178	3.35251	0.000800838	0.0128758
PMO010341	GRAM3	11.0746	-1.08148	0.361922	2.99133	0.00277762	0.0320609
PMO013616	UBE4B	365.109	-1.08086	0.23216	4.65385	3.25798e-06	0.000179411
PMO002402	RN208	21.0298	-1.07849	0.350976	3.06252	0.00219485	0.0274629
PMO015965	SPB1	286.024	-1.07749	0.294105	3.66124	0.000250996	0.00537747
PMO004167	TRM44	70.464	-1.07483	0.320097	3.35755	0.000786365	0.0127332
PMO011658	DIRC2	284.183	-1.07447	0.275487	3.89597	9.78046e-05	0.00259783
PMO012042	AP4AT	27.2363	-1.07223	0.345581	3.09266	0.00198368	0.0252378
PMO017009	ELP4	26.9852	-1.07193	0.318958	3.3595	0.000780832	0.0126889
PMO009502	RINI	53.9659	-1.06853	0.278167	3.83887	0.000123603	0.00310167
PMO011831	MSH2	22.3023	-1.06688	0.30451	3.50913	0.000449579	0.00835169
PMO012054	CBX4	26.8477	-1.0645	0.323947	3.2709	0.00107205	0.0162038
PMO013990	TES	6.11394	-1.06313	0.366454	2.87745	0.00400898	0.0412897
PMO001275	APC5	22.5071	-1.06238	0.310154	3.43018	0.000603177	0.0103073
PMO000395	BRAT1	60.5761	-1.06127	0.300969	3.52673	0.000420727	0.00805512
PMO013113	APH1A	34.6832	-1.06125	0.28485	3.7246	0.000195622	0.00433812
PMO004391	PRP18	245.958	-1.05802	0.233281	4.53463	5.77035e-06	0.000281286
PMO015478	KLHL8	44.7403	-1.05574	0.299145	3.52643	0.0004212	0.00805512
PMO003734	R144A	19.9668	-1.05408	0.37318	2.791	0.00525447	0.0490093
PMO007313	CE164	8.85653	-1.05233	0.300842	3.48789	0.000486856	0.00887116
PMO005081	UBL7	99.3509	-1.05227	0.281507	3.73721	0.000186073	0.00419425
PMO015526	SDA1	25.7412	-1.04955	0.296571	3.53646	0.000405525	0.00785457
PMO008166	SDCB1	101.867	-1.04616	0.316627	3.29775	0.000974643	0.0151102
PMO009046	WDFY1	44.1446	-1.04509	0.277597	3.7563	0.000172442	0.00395572
PMO010857	MKLN1	267.795	-1.04037	0.236471	4.39832	1.0909e-05	0.000463071
PMO014338	SNR40	61.1118	-1.03982	0.30187	3.44431	0.000572524	0.0100791
PMO016489	MIP	2.76122	-1.03876	0.395475	2.84474	0.00444474	0.04392
PMO010862	VCO3	44.4023	-1.03819	0.357452	2.88991	0.00385347	0.0404214
PMO012434	PPR27	796.146	-1.03776	0.355776	2.91012	0.00361286	0.0387019
PMO005125	TRI35	19.7736	-1.0334	0.341898	3.01064	0.00260696	0.0307953
PMO002787	STAT3	255.734	-1.03291	0.242251	4.26032	2.04132e-05	0.000766253
PMO005990	TSNAX	33.1555	-1.03164	0.303326	3.40385	0.000664427	0.0111359
PMO000782	TICRR	17.7304	-1.02919	0.314263	3.27373	0.00106136	0.0161728
PMO007173	BCAR1	313.313	-1.0256	0.233266	4.39374	1.11418e-05	0.000468576
PMO012629	GFOD2	168.898	-1.02527	0.258705	3.9616	7.44489e-05	0.00213342
PMO005889	PI3R4	468.373	-1.02268	0.267799	3.81693	0.000135123	0.00329963
PMO011864	PDCD2	17.0157	-1.02235	0.313574	3.24248	0.00118496	0.0175598
PMO003419	SOAT1	14.8018	-1.02165	0.338043	2.98976	0.00279195	0.0321853
PMO007352	DCPS	41.1361	-1.01924	0.274775	3.7065	0.000210144	0.00462382
PMO004295	SMBP2	120.594	-1.01734	0.348754	2.9083	0.00363396	0.0388622
PMO000009	PALB2	20.361	-1.01647	0.314591	3.23597	0.0012123	0.0179358
PMO006191	MFGM	337.703	-1.01534	0.2699	3.75994	0.000169952	0.00393838
PMO000334	NUBP2	61.6202	-1.01469	0.313244	3.23214	0.00122868	0.018119
PMO008308	MERTK	136.463	-1.01306	0.287989	3.51625	0.000437697	0.00821495
PMO002937	UGDH	22.7944	-1.01304	0.319696	3.16097	0.00157245	0.0214476
PMO002761	PLAK	230.777	-1.01295	0.227795	4.44354	8.84909e-06	0.000397946
PMO012557	BCAS3	129.449	-1.01076	0.242856	4.15773	3.2142e-05	0.00112086
PMO001369	IFT80	12.3473	-1.00887	0.349863	2.85512	0.00430212	0.0430402
PMO013662	NOC2L	52.0503	-1.0087	0.260599	3.87058	0.000108575	0.00280995
PMO008055	DKC1	88.6567	-1.00814	0.240196	4.19763	2.69723e-05	0.00099197
PMO016431	CAN1	171.676	-1.00783	0.335721	2.99739	0.00272306	0.0317132
PMO002706	S35B2	39.1335	-1.00741	0.257169	3.90976	9.23862e-05	0.00251268
PMO013783	CEP76	16.687	-1.00512	0.316278	3.17949	0.00147536	0.0206484
PMO009267	PDCD6	27.6518	-1.0042	0.291325	3.43201	0.000599131	0.0103073
PMO006558	KCTD6	14.8846	-1.00355	0.26427	3.79023	0.00015051	0.00356446
PMO012276	NLE1	33.5417	-1.00266	0.307531	3.25576	0.00113091	0.0170368
PMO012669	N4BP1	108.077	-1.00145	0.273067	3.66603	0.000246349	0.00530293
PMO014351	TM39B	15.7768	-1.00136	0.348332	2.88094	0.00396486	0.0410214
PMO012175	RAPSN	132.796	-1.00007	0.354148	2.81962	0.00480811	0.0463169
PMO003628	NAT10	109.27	-0.998145	0.232597	4.29179	1.77237e-05	0.000676478
PMO013993	IFRD1	375.103	-0.996401	0.274222	3.63145	0.000281835	0.00588989
PMO011590	BZW1	416.138	-0.993232	0.245257	4.04844	5.156e-05	0.00158233
PMO005012	NOL6	125.973	-0.990765	0.293818	3.37003	0.000751606	0.0123108
PMO008750	MSPD1	195.919	-0.985803	0.263819	3.73541	0.000187406	0.00421386
PMO014317	NCDN	33.165	-0.985719	0.289357	3.41086	0.000647587	0.0109343
PMO012027	SOCS3	11.6447	-0.985378	0.3406	2.86599	0.00415707	0.0421931
PMO008149	RAB2A	607.32	-0.983974	0.318663	3.08407	0.0020419	0.0257978
PMO003574	CDT1	13.1728	-0.982697	0.286804	3.42423	0.000616546	0.0104882
PMO012888	CDC16	75.0165	-0.981067	0.287569	3.4127	0.000643229	0.010881
PMO011484	RBM43	34.0976	-0.980816	0.255305	3.84069	0.000122688	0.00308725
PMO002145	FBX34	240.943	-0.980603	0.220717	4.44092	8.95746e-06	0.000400835
PMO003973	SNX33	39.6824	-0.975389	0.257054	3.79171	0.000149616	0.00355789
PMO008558	ENP1	343.066	-0.975212	0.267613	3.6403	0.000272317	0.00573951
PMO015603	PRPF3	304.96	-0.975028	0.299941	3.24896	0.00115828	0.017277
PMO015989	KLDC1	85.4514	-0.97351	0.252609	3.85429	0.000116066	0.0029451
PMO006568	TM115	141.501	-0.973496	0.292203	3.32704	0.000877751	0.0138911
PMO006343	CNOT8	13.4432	-0.972486	0.314248	3.10382	0.00191039	0.0247208
PMO013500	H110	123.928	-0.967872	0.303346	3.1892	0.00142666	0.020218
PMO013299	RAD1	15.7425	-0.966694	0.339028	2.84232	0.00447867	0.0441739
PMO000381	GID4	26.6156	-0.964393	0.264203	3.65185	0.000260358	0.00554191
PMO013846	SNF5	83.3468	-0.964108	0.269379	3.58068	0.000342702	0.00690266
PMO012687	BBS2	82.885	-0.964095	0.331678	2.90485	0.00367433	0.0391297
PMO000254	L2GL1	41.5413	-0.963665	0.25117	3.82607	0.000130204	0.00320536
PMO011729	UBXN4	664.822	-0.961597	0.276628	3.47436	0.000512079	0.00921134
PMO003026	SMOX	222.418	-0.961302	0.230141	4.17634	2.96232e-05	0.00105944
PMO010286	KAD6	68.4713	-0.960784	0.323587	2.96969	0.002981	0.033905
PMO015440	S38A6	15.7736	-0.960714	0.336911	2.84067	0.00450187	0.0442575
PMO002411	LRSM1	132.031	-0.960255	0.292249	3.28444	0.00102185	0.0156993
PMO000674	SEC13	113.153	-0.959816	0.272154	3.52686	0.00042052	0.00805512
PMO011899	COPB	209.029	-0.959436	0.251249	3.81786	0.000134613	0.00329602
PMO003665	SOSB2	37.1561	-0.959185	0.301656	3.18077	0.00146884	0.0206228
PMO009174	RN126	60.9684	-0.954322	0.253126	3.76763	0.000164802	0.00384703
PMO004291	VPS51	135.488	-0.951906	0.316313	3.007	0.00263839	0.0310858
PMO006471	PPM1M	34.5177	-0.949607	0.298919	3.1763	0.00149164	0.0206872
PMO005396	CTL2	63.0868	-0.948713	0.287	3.29582	0.000981344	0.0151866
PMO005393	MLP3A	411.316	-0.948248	0.208232	4.55287	5.2919e-06	0.00026413
PMO006079	NUP43	23.7563	-0.947636	0.210493	4.49665	6.90317e-06	0.000319941
PMO016019	BAP29	42.5223	-0.947591	0.276027	3.43347	0.000595908	0.0103073
PMO013893	ACD11	320.935	-0.946495	0.271272	3.4871	0.000488285	0.00887116
PMO004529	PRR5L	44.954	-0.946091	0.329206	2.87126	0.00408836	0.0417757
PMO009937	SIX1B	133.487	-0.943723	0.245902	3.83794	0.000124073	0.0031049
PMO008981	ALG11	18.9344	-0.943682	0.317318	2.98393	0.0028457	0.0326393
PMO010135	THIO	67.4493	-0.943602	0.320718	2.94403	0.00323963	0.0358757
PMO000114	UBAD1	313.598	-0.943315	0.26165	3.60388	0.000313504	0.00644315
PMO000241	TBL3	43.3235	-0.941588	0.335296	2.81035	0.00494882	0.047269
PMO004495	SF3B4	65.2841	-0.94132	0.248572	3.78647	0.000152805	0.00359606
PMO003788	KCMF1	378.616	-0.940978	0.28114	3.34513	0.000822453	0.0131303
PMO012359	NUP88	214.417	-0.940848	0.303788	3.09574	0.00196319	0.0251023
PMO013487	NR2C1	22.9084	-0.937489	0.244299	3.83482	0.000125656	0.00313166
PMO012940	CHPT1	39.4389	-0.937318	0.263169	3.55672	0.000375514	0.00733585
PMO003245	WDR4	57.4384	-0.936267	0.312275	2.99939	0.00270524	0.0315822
PMO001756	DHX37	52.7354	-0.935887	0.211184	4.43206	9.33387e-06	0.000415632
PMO013203	CAND1	65.0536	-0.935312	0.257375	3.63257	0.000280608	0.00588694
PMO016452	RBM4B	327.038	-0.933962	0.264146	3.5327	0.000411333	0.00795011
PMO016335	4F2	216.636	-0.930798	0.332647	2.79242	0.00523156	0.0488925
PMO002169	PURA2	320.881	-0.93057	0.32232	2.88345	0.00393344	0.0407892
PMO013851	DDX51	20.8707	-0.929526	0.299458	3.10803	0.00188342	0.0244763
PMO010672	IKZF5	90.6393	-0.929253	0.296714	3.13023	0.00174667	0.0231631
PMO011992	NPL4	1085.8	-0.929131	0.270154	3.43731	0.000587523	0.0102439
PMO007685	CATZ	163.934	-0.927712	0.254976	3.63699	0.000275847	0.00580045
PMO000432	METL6	41.2564	-0.924499	0.296915	3.11169	0.00186022	0.024349
PMO008577	UB2R1	260.967	-0.923501	0.269014	3.43039	0.000602719	0.0103073
PMO012794	OSBL9	120.762	-0.922166	0.261676	3.52411	0.000424909	0.00809198
PMO010222	KANL3	148.305	-0.922097	0.221869	4.15424	3.2637e-05	0.00113158
PMO007690	PSA7	675.453	-0.917608	0.268291	3.41867	0.000629285	0.010665
PMO009222	PACE1	160.147	-0.915543	0.257005	3.56236	0.000367538	0.00726478
PMO011682	NIF3L	75.8762	-0.915298	0.3086	2.96605	0.00301648	0.0342093
PMO010309	ZUFSP	13.8061	-0.911797	0.308566	2.94956	0.00318225	0.0354467
PMO002453	UCK1	32.2451	-0.909234	0.264504	3.42997	0.000603642	0.0103073
PMO014040	RXRA	560.829	-0.908965	0.27759	3.27237	0.00106651	0.0161833
PMO001380	DVL3	40.9058	-0.906801	0.260745	3.4754	0.000510097	0.00920092
PMO010218	CB042	78.7377	-0.90666	0.250471	3.61891	0.000295851	0.00612189
PMO004008	NEUA	95.9798	-0.905502	0.221131	4.09467	4.22762e-05	0.00137156
PMO008929	PTN23	196.01	-0.905134	0.248465	3.6419	0.000270635	0.00571733
PMO007186	S38A6	40.0232	-0.904559	0.300701	2.9991	0.00270778	0.0315822
PMO000806	TIPIN	8.92578	-0.902886	0.322068	2.80511	0.00502993	0.0477586
PMO009519	ZN622	90.1837	-0.902481	0.303057	2.97915	0.00289051	0.0330281
PMO007303	TPPC4	60.7702	-0.901676	0.26203	3.43898	0.000583911	0.0102201
PMO013199	XPOT	73.9811	-0.899906	0.255753	3.51352	0.00044221	0.00824854
PMO000368	SUN1	192.741	-0.899574	0.222512	4.04108	5.32059e-05	0.00161392
PMO012655	CPSF5	116.561	-0.895776	0.308897	2.8996	0.00373635	0.0396044
PMO007912	GAR1	20.1711	-0.895564	0.281545	3.17891	0.00147828	0.0206484
PMO000813	UACA	110.286	-0.892987	0.248474	3.58995	0.000330747	0.00672148
PMO003336	ZN830	109.871	-0.890775	0.274335	3.24808	0.00116187	0.017277
PMO015907	SASB	43.6289	-0.889337	0.25253	3.52044	0.000430825	0.00815175
PMO000673	RAD18	56.0557	-0.886905	0.275398	3.22493	0.00126004	0.0184721
PMO012204	PRS6A	1047.99	-0.886692	0.289383	3.06187	0.00219957	0.027484
PMO009751	CDN1A	22.1597	-0.885277	0.298819	2.95681	0.00310843	0.0348284
PMO003817	TRM1L	27.9356	-0.882687	0.245717	3.59159	0.000328671	0.00669428
PMO014266	CHPF2	185.507	-0.882117	0.235029	3.75284	0.000174843	0.00399064
PMO000877	FURIN	201.507	-0.878289	0.22676	3.87066	0.000108539	0.00280995
PMO005006	MBB1A	34.7557	-0.877897	0.303584	2.89576	0.00378247	0.0399535
PMO007407	RAI2	73.892	-0.876987	0.288349	3.03595	0.00239779	0.0293551
PMO012400	UTP6	31.2231	-0.876956	0.290141	3.02554	0.0024819	0.0297884
PMO012028	HGS	216.074	-0.874652	0.236126	3.70436	0.000211923	0.00463882
PMO014533	PNO1	99.5345	-0.871683	0.228781	3.81183	0.000137942	0.00334152
PMO006916	SENP5	119.294	-0.870624	0.278211	3.12868	0.00175595	0.0232523
PMO007132	S7A6O	49.7394	-0.866558	0.279813	3.09961	0.00193775	0.0248975
PMO014111	RN19B	69.7088	-0.864481	0.258346	3.34935	0.000810026	0.0130005
PMO010239	RUFY3	27.7017	-0.863216	0.28503	3.02534	0.00248356	0.0297884
PMO000604	SPEN	86.4888	-0.862417	0.208481	4.1365	3.52648e-05	0.00120885
PMO000922	ROA0	49.1576	-0.86099	0.22981	3.74134	0.000183039	0.00415682
PMO014897	EXOSX	75.1964	-0.860016	0.271691	3.16633	0.00154375	0.0211515
PMO012487	PDIA1	185.452	-0.858983	0.208221	4.1245	3.71548e-05	0.00125153
PMO004901	UCKL1	34.2926	-0.858577	0.265047	3.24287	0.0011833	0.0175598
PMO011644	LFG3	268.194	-0.854162	0.273727	3.11998	0.00180862	0.0237421
PMO003527	CREG1	63.4739	-0.853158	0.233503	3.65208	0.000260129	0.00554191
PMO008932	TSNA1	43.7757	-0.852857	0.28202	3.01895	0.0025365	0.0301197
PMO002842	FHL1	29.3994	-0.851157	0.26759	3.1765	0.00149066	0.0206872
PMO012047	UBP36	19.1493	-0.846393	0.279651	3.02467	0.00248901	0.0297884
PMO001788	ACACB	3776.68	-0.84576	0.209013	4.04569	5.2169e-05	0.00159356
PMO005840	RAB18	69.3412	-0.845076	0.262941	3.21284	0.00131428	0.019011
PMO003234	PRP16	179.131	-0.843758	0.278094	3.03416	0.00241205	0.0294108
PMO015433	MAT1	52.2995	-0.8437	0.278924	3.02429	0.00249221	0.0297884
PMO000469	MIO	99.2166	-0.843139	0.21711	3.8825	0.000103388	0.00272224
PMO003552	GPHR	14.0227	-0.841695	0.283635	2.96865	0.00299108	0.0339637
PMO006591	BRPF1	165.782	-0.840377	0.21506	3.90713	9.33986e-05	0.00253264
PMO004509	CERS2	20.1773	-0.836041	0.259966	3.20939	0.00133017	0.0191798
PMO012420	CC137	53.7386	-0.835578	0.282052	2.96042	0.00307221	0.03462
PMO016091	NRBP	245.226	-0.833316	0.260615	3.19653	0.0013909	0.0198663
PMO012588	GIT1	63.6194	-0.832981	0.258102	3.22431	0.00126276	0.0184721
PMO000318	LUC7	84.8103	-0.832441	0.2754	3.02505	0.0024859	0.0297884
PMO011843	GINM1	65.6516	-0.829157	0.271985	3.04571	0.0023213	0.0286894
PMO003569	ZN276	38.757	-0.827252	0.259182	3.19137	0.00141601	0.0200985
PMO003218	PIEZ1	520.781	-0.826804	0.256227	3.22486	0.00126036	0.0184721
PMO002374	MED12	141.307	-0.826184	0.184454	4.47677	7.57799e-06	0.000345922
PMO004845	PRS10	571.75	-0.825032	0.251141	3.28411	0.00102305	0.0156993
PMO012634	RBP10	214.87	-0.818963	0.265563	3.0826	0.002052	0.0258535
PMO012381	SEN54	19.2891	-0.815948	0.272998	2.98859	0.0028027	0.0322683
PMO009945	TRM5	90.285	-0.813656	0.26382	3.08543	0.00203257	0.0257157
PMO008881	RAB14	102.881	-0.812119	0.289688	2.80483	0.00503433	0.0477586
PMO010793	MIA3	235.349	-0.811725	0.196027	4.14065	3.46324e-05	0.00119167
PMO010674	RPA49	100.661	-0.810423	0.273403	2.96563	0.00302068	0.0342143
PMO007505	BACE1	66.9341	-0.804158	0.26811	2.99361	0.00275698	0.0319095
PMO015018	ELL	176.757	-0.799349	0.256985	3.10962	0.00187328	0.0244076
PMO012692	COG4	54.6659	-0.797087	0.262557	3.03464	0.00240824	0.0294038
PMO007656	TF3A	34.3702	-0.792358	0.233739	3.39157	0.000694947	0.0115621
PMO012899	MFSD9	61.8848	-0.791441	0.265885	2.97303	0.00294875	0.033609
PMO002385	PLST	302.719	-0.78802	0.251509	3.1311	0.00174152	0.0231285
PMO006468	GL8D1	26.3646	-0.787547	0.271828	2.90162	0.00371239	0.0394663
PMO001911	HNRPK	130.504	-0.787306	0.27918	2.81847	0.00482532	0.0464334
PMO010049	THIM	2334.54	-0.785177	0.24416	3.21482	0.00130528	0.0189714
PMO002421	CDK9	52.9911	-0.781719	0.228747	3.41878	0.000629035	0.010665
PMO008552	CHERP	198.936	-0.781275	0.192204	4.06493	4.8047e-05	0.00151024
PMO006194	SO3A1	19.4442	-0.780935	0.258288	3.01452	0.00257382	0.0304832
PMO003800	PIGG	19.93	-0.780698	0.264249	2.94938	0.00318411	0.0354467
PMO006699	FA98B	60.7161	-0.780619	0.251766	3.10256	0.00191854	0.024791
PMO011549	ANKZ1	75.9971	-0.779836	0.266975	2.9223	0.00347452	0.0375586
PMO007241	GMEB2	22.3191	-0.778452	0.265862	2.92464	0.00344859	0.0374277
PMO001139	TRIM8	32.1334	-0.777391	0.277591	2.79449	0.00519816	0.0487652
PMO000458	KLHL7	70.8816	-0.777314	0.234615	3.31293	0.000923239	0.0144848
PMO003593	WWP2	90.6854	-0.777087	0.277346	2.79792	0.00514328	0.0485671
PMO009858	ANX11	164.876	-0.774569	0.249038	3.10962	0.00187329	0.0244076
PMO001236	CLIP1	763.256	-0.77007	0.267418	2.87846	0.00399621	0.0412897
PMO006761	PANK1	146.686	-0.767815	0.243267	3.15587	0.00160019	0.0216634
PMO012642	FHOD1	1170.52	-0.766295	0.266495	2.87425	0.00404992	0.0415231
PMO008686	MED28	48.351	-0.765459	0.195068	3.92369	8.72025e-05	0.0024204
PMO005962	NUCB2	60.102	-0.762371	0.2258	3.37542	0.000737035	0.012151
PMO009136	IF4A3	342.597	-0.761659	0.267114	2.85075	0.00436169	0.0433972
PMO003066	RARA	95.4324	-0.756316	0.24539	3.08305	0.0020489	0.0258503
PMO013290	RGP1	41.6791	-0.755844	0.255135	2.96307	0.00304588	0.034437
PMO014750	SP130	115.106	-0.753804	0.203856	3.69798	0.000217318	0.00474547
PMO004732	OS9	72.7215	-0.748734	0.26844	2.78969	0.00527578	0.0490418
PMO013677	CE104	35.8566	-0.748408	0.234205	3.19462	0.00140014	0.0199669
PMO014162	TXND5	69.6633	-0.745007	0.2552	2.91999	0.00350042	0.037755
PMO001413	ELOV1	53.2288	-0.744244	0.262432	2.83442	0.00459085	0.0449389
PMO000362	CP062	49.053	-0.743887	0.24951	2.97942	0.00288795	0.0330281
PMO009108	RAB1A	599.999	-0.743728	0.203995	3.64538	0.000266997	0.0056536
PMO007963	RTCB	154.175	-0.741914	0.234829	3.15875	0.00158448	0.0215794
PMO000239	TRAF7	39.0855	-0.740634	0.236377	3.13462	0.00172074	0.0228861
PMO004121	U5S1	147.773	-0.736813	0.207081	3.55836	0.000373179	0.00732728
PMO003693	LIPB1	72.6387	-0.732256	0.196517	3.72438	0.000195798	0.00433812
PMO007247	TBC20	32.1373	-0.730547	0.255606	2.85378	0.00432024	0.0431374
PMO002050	TM39A	17.8535	-0.728412	0.25154	2.89251	0.0038218	0.0401356
PMO012842	M3K15	167.096	-0.728207	0.257333	2.82987	0.00465667	0.0453389
PMO006330	SQSTM	3423.42	-0.727439	0.260961	2.78647	0.00532849	0.0494423
PMO007569	UBE4A	301.53	-0.72647	0.241943	3.00224	0.00268002	0.0315354
PMO001180	NFKB2	103.188	-0.724095	0.260409	2.78147	0.00541126	0.0499552
PMO002054	UBP5	175.902	-0.723988	0.253864	2.85148	0.00435158	0.043344
PMO013831	PESC	395.98	-0.722897	0.238863	3.02607	0.00247754	0.0297884
PMO009268	TEX10	61.9906	-0.717813	0.24012	2.99216	0.00277011	0.0320149
PMO007494	COPD	164.177	-0.707658	0.206187	3.43067	0.000602091	0.0103073
PMO009510	CK024	27.8118	-0.705629	0.245195	2.87796	0.00400251	0.0412897
PMO015627	MIC1	163.466	-0.704063	0.25297	2.78378	0.00537295	0.0497374
PMO014733	LSG1	43.9077	-0.701995	0.251419	2.79434	0.00520062	0.0487652
PMO006723	SRP54	163.681	-0.700667	0.248058	2.82412	0.00474102	0.0458652
PMO008867	CUL1	144.788	-0.697509	0.246595	2.82836	0.0046787	0.0454559
PMO006480	UBP4	919.753	-0.697453	0.22597	3.08608	0.00202815	0.0256955
PMO002643	T2EB	26.4011	-0.69491	0.24021	2.89448	0.00379783	0.0400226
PMO009093	SHC1	128.327	-0.68879	0.239421	2.87628	0.00402393	0.0413503
PMO008909	REXO4	62.7507	-0.687559	0.244631	2.81251	0.00491571	0.0470045
PMO007143	PAPD5	31.3888	-0.68333	0.217762	3.1394	0.00169292	0.0226487
PMO002432	ASB6	44.366	-0.682389	0.220247	3.09866	0.00194398	0.024938
PMO002793	ACLY	134.645	-0.681911	0.236622	2.8817	0.00395538	0.0409699
PMO008115	PWP1	35.7861	-0.681467	0.233317	2.9227	0.00347015	0.0375586
PMO013252	CPSF6	89.7519	-0.680061	0.214845	3.16304	0.00156131	0.0213598
PMO001656	NU188	53.7031	-0.67993	0.201499	3.37281	0.00074405	0.0122223
PMO009650	TF2B	64.6426	-0.675963	0.212127	3.18757	0.00143473	0.0202691
PMO013843	FBX21	115.451	-0.674625	0.21833	3.08879	0.00200973	0.0254977
PMO000179	INT1	149.292	-0.669379	0.170455	3.92558	8.65221e-05	0.00241512
PMO000814	MO4L1	59.1645	-0.666238	0.210838	3.16151	0.00156954	0.0214401
PMO007102	GPR56	219.435	-0.664968	0.23408	2.84038	0.004506	0.0442575
PMO004028	CCNT1	299.181	-0.663844	0.207197	3.2027	0.00136144	0.0195068
PMO011895	HEAT1	93.7759	-0.662069	0.233326	2.83859	0.00453129	0.0444037
PMO007642	MED17	85.8526	-0.659734	0.234678	2.81316	0.00490565	0.0470045
PMO006778	P4K2A	69.1378	-0.659696	0.236176	2.79086	0.00525686	0.0490093
PMO000319	CLCN7	143.588	-0.652994	0.229761	2.84121	0.00449431	0.0442575
PMO002220	NADAP	50.7027	-0.648319	0.218899	2.96286	0.00304793	0.034437
PMO004098	PCIF1	138.716	-0.647917	0.224453	2.88701	0.00388927	0.040542
PMO015931	NUP98	906.238	-0.646059	0.228117	2.83142	0.00463416	0.0452167
PMO004606	ACVR1	137.077	-0.64053	0.156474	4.09281	4.26168e-05	0.00137769
PMO001227	BRAP	69.2924	-0.637738	0.20885	3.05146	0.00227732	0.0282998
PMO012131	PEX16	32.517	-0.635709	0.216211	2.93799	0.00330343	0.0363494
PMO002200	KCTD3	137.735	-0.622976	0.204719	3.04365	0.00233729	0.0287451
PMO002112	PAPOA	87.8608	-0.609362	0.20766	2.9344	0.00334198	0.0366207
PMO011898	LMBL3	46.229	-0.604619	0.205078	2.94601	0.00321906	0.0357481
PMO002604	CAP1	71.6694	-0.603888	0.184462	3.27198	0.00106796	0.0161833
PMO013839	AP1B1	106.299	-0.60252	0.21059	2.85962	0.00424152	0.0425275
PMO007210	CSTF1	113.964	-0.598454	0.191389	3.12803	0.00175982	0.0232696
PMO008903	PSMD5	53.4568	-0.59733	0.198987	2.99958	0.00270351	0.0315822
PMO003069	CASC3	344.805	-0.592314	0.205144	2.88699	0.00388945	0.040542
PMO011933	KPRA	31.0413	0.59028	0.199228	-2.96008	0.00307555	0.03462
PMO015259	IDH3A	4457.37	0.590531	0.131837	-4.47933	7.48794e-06	0.000345281
PMO016023	DLDH	2303.32	0.592592	0.206158	-2.8748	0.00404287	0.0414977
PMO007450	ODPA	3155.36	0.59535	0.189058	-3.14934	0.00163641	0.0220224
PMO014433	SYLM	158.989	0.600372	0.201192	-2.98499	0.00283583	0.0325673
PMO009254	ADPRH	112.471	0.606956	0.216729	-2.80001	0.00511008	0.0483038
PMO011485	NEBU	5369.74	0.61404	0.207606	-2.95813	0.00309516	0.0347976
PMO016220	P4HA1	107.248	0.627852	0.214045	-2.93318	0.00335512	0.0367203
PMO006759	ACTA	132.251	0.631833	0.199164	-3.17281	0.00150972	0.0208741
PMO016365	IPYR2	70.3181	0.637447	0.220996	-2.88384	0.00392864	0.0407861
PMO015464	DRAM2	38.731	0.641822	0.214861	-2.98748	0.00281284	0.0323441
PMO012760	CPT2	719.575	0.642078	0.219712	-2.92271	0.00346995	0.0375586
PMO006064	TM242	52.4359	0.653134	0.213099	-3.06139	0.0022031	0.0274903
PMO005781	3HIDH	50.1757	0.661651	0.218067	-3.0317	0.00243184	0.0295348
PMO006687	CIA30	146.992	0.662705	0.231843	-2.8597	0.00424044	0.0425275
PMO008312	IF2M	124.253	0.66333	0.231226	-2.87074	0.00409513	0.0417979
PMO002607	NFYC	130.081	0.669959	0.188356	-3.55759	0.000374269	0.00732728
PMO012409	CCG1	134.488	0.672059	0.207972	-3.23127	0.0012324	0.0181445
PMO013263	TMEM5	78.8261	0.674587	0.174735	-3.85877	0.00011396	0.0029161
PMO008604	PGK	1933.72	0.674735	0.210602	-3.2044	0.00135343	0.0194534
PMO006896	EFGM	720.444	0.674773	0.233619	-2.88928	0.00386128	0.0404566
PMO002821	LPAR4	112.87	0.674794	0.209379	-3.22219	0.00127217	0.0185495
PMO015653	PCCA	175.821	0.679006	0.219787	-3.08962	0.00200411	0.0254619
PMO001755	SCRB1	315.335	0.679441	0.210786	-3.22414	0.00126352	0.0184721
PMO001243	AT2A2	59.2112	0.680983	0.223613	-3.0435	0.00233847	0.0287451
PMO008152	RM53	194.111	0.691896	0.243	-2.84725	0.00440992	0.0437811
PMO005793	CYC	1196.91	0.692734	0.249016	-2.78311	0.00538412	0.0497551
PMO015822	TM183	233.572	0.696	0.245924	-2.83019	0.00465202	0.0453389
PMO000521	OXND1	53.5721	0.704754	0.244328	-2.88741	0.00388427	0.040542
PMO008517	PARK7	281.423	0.71493	0.220177	-3.24814	0.00116163	0.017277
PMO014446	EPDR1	396.739	0.717236	0.240619	-2.98158	0.00286761	0.0328491
PMO004817	CSR2B	200.724	0.720976	0.18177	-3.96662	7.28995e-05	0.00210228
PMO006878	GLYG	287.099	0.725968	0.209505	-3.4657	0.000528844	0.00945674
PMO008172	RM15	151.493	0.733225	0.223806	-3.27685	0.00104972	0.0160533
PMO012301	SGSM2	55.3059	0.736968	0.252808	-2.91185	0.00359299	0.03858
PMO014655	ABEC2	405.304	0.738353	0.258688	-2.8552	0.00430104	0.0430402
PMO001107	RBM20	306.218	0.742464	0.212919	-3.48728	0.00048796	0.00887116
PMO002149	KLC1	56.497	0.745012	0.250656	-2.96957	0.00298218	0.033905
PMO000253	MID49	978.483	0.749341	0.2477	-3.02606	0.00247762	0.0297884
PMO012758	NLTP	287.704	0.755292	0.143563	-5.26041	1.43731e-07	1.34603e-05
PMO002835	ARHG6	30.3352	0.755487	0.259271	-2.90652	0.0036547	0.0390121
PMO007545	PKNX2	54.6702	0.759237	0.18393	-4.12689	3.67708e-05	0.00124637
PMO002449	COQ4	92.4639	0.762564	0.272961	-2.79263	0.00522809	0.0488925
PMO008358	PARP1	66.2146	0.762728	0.224538	-3.3976	0.000679807	0.0113727
PMO006193	KLH25	20.5775	0.766115	0.261474	-2.92207	0.00347719	0.0375586
PMO001072	AATC	2929.73	0.771653	0.188829	-4.08693	4.37124e-05	0.0014081
PMO015341	FKBP3	755.896	0.771879	0.277531	-2.78355	0.00537672	0.0497374
PMO014277	MAP4	225.771	0.772882	0.228367	-3.38517	0.000711336	0.0117916
PMO006362	PDLI7	52.3103	0.772887	0.25367	-3.04367	0.00233711	0.0287451
PMO011773	URB2	237.246	0.776439	0.258912	-2.99909	0.00270785	0.0315822
PMO014347	TSAP1	15.155	0.780047	0.276251	-2.82848	0.00467703	0.0454559
PMO008485	ENOA	10306.6	0.781877	0.179993	-4.34434	1.39696e-05	0.000556578
PMO011511	IQCB1	58.2135	0.782474	0.245633	-3.18791	0.00143305	0.0202691
PMO002381	TAF1	258.632	0.783804	0.195407	-4.01117	6.04182e-05	0.00180539
PMO001616	HEM2	26.8838	0.787408	0.272447	-2.88644	0.00389621	0.040542
PMO008044	GPC4	66.7703	0.78775	0.277166	-2.84033	0.00450662	0.0442575
PMO006781	PGAM1	3471.46	0.791265	0.216765	-3.65111	0.000261112	0.00554191
PMO007131	OSGI1	158.767	0.791514	0.28305	-2.79707	0.0051568	0.0486442
PMO006989	SNX3	65.9989	0.792907	0.229242	-3.46035	0.000539466	0.00960884
PMO009651	TTLL7	57.7227	0.796151	0.283028	-2.81257	0.00491466	0.0470045
PMO003176	T22D3	429.079	0.799455	0.251676	-3.17751	0.00148546	0.0206872
PMO000373	ADCY9	472.108	0.804577	0.272277	-2.95671	0.0031094	0.0348284
PMO006715	ADCK1	46.5632	0.805548	0.228448	-3.52524	0.000423093	0.00807433
PMO001128	TACC2	498.222	0.806484	0.238305	-3.38551	0.000710454	0.0117916
PMO012188	TGFB3	19.9138	0.810624	0.26553	-3.04782	0.00230505	0.0285662
PMO016221	MICU1	956.659	0.81226	0.2574	-3.15751	0.00159122	0.0216064
PMO000771	ZNT4	34.9094	0.816993	0.237699	-3.43226	0.000598582	0.0103073
PMO016061	NUD13	95.2128	0.824811	0.27273	-3.02482	0.00248782	0.0297884
PMO002323	FA8	193.511	0.827014	0.296229	-2.79426	0.00520184	0.0487652
PMO006146	OTU7A	38.6155	0.832778	0.297147	-2.80919	0.00496662	0.0473418
PMO001562	PCF11	448.463	0.83298	0.286037	-2.91437	0.00356408	0.0383149
PMO000879	NEO1	45.0302	0.833463	0.238318	-3.49118	0.000480884	0.00878944
PMO011983	MP2K6	44.5091	0.839878	0.292576	-2.8645	0.00417663	0.0422562
PMO002377	TRM2	74.3406	0.841806	0.223834	-3.76207	0.000168515	0.00391506
PMO004156	WFS1	304.789	0.842469	0.294004	-2.86764	0.00413544	0.0420205
PMO001246	SETD8	49.4122	0.842497	0.302444	-2.78944	0.00527993	0.0490418
PMO001282	TNG2	77.3895	0.843751	0.29862	-2.82802	0.00468373	0.0454562
PMO000752	LACTB	62.3589	0.846297	0.24365	-3.47519	0.000510487	0.00920092
PMO008190	HOT	146.263	0.847565	0.279576	-3.03306	0.00242084	0.0294784
PMO004906	FNDC4	28.7189	0.848732	0.26581	-3.1925	0.00141045	0.0200509
PMO015024	SUGP2	42.4081	0.850546	0.295786	-2.8776	0.00400717	0.0412897
PMO015262	HM20A	22.554	0.852583	0.30262	-2.8067	0.00500524	0.04761
PMO007162	KPBB	739.144	0.858868	0.297246	-2.89262	0.00382047	0.0401356
PMO014518	DYLT3	15.3294	0.858974	0.268377	-3.18622	0.00144146	0.0203327
PMO012249	LR75A	72.3452	0.862419	0.275852	-3.12362	0.00178642	0.0235527
PMO011926	TNR6C	82.639	0.863344	0.302654	-2.85165	0.00434924	0.043344
PMO015642	CLYBL	116.808	0.865375	0.194501	-4.44823	8.65804e-06	0.000391292
PMO004353	PBLD	14.2184	0.866351	0.284272	-3.0495	0.00229219	0.0284457
PMO011556	BCS1	69.6237	0.867906	0.235675	-3.68442	0.000229226	0.00496104
PMO015919	CAH2	612.827	0.868795	0.26083	-3.33262	0.000860326	0.0136629
PMO007424	DCNL2	137.16	0.868957	0.263531	-3.29772	0.000974745	0.0151102
PMO004747	TRM13	13.8181	0.877554	0.307222	-2.86196	0.00421033	0.0424491
PMO014240	HXK2	652.728	0.877567	0.308737	-2.84642	0.00442134	0.0438465
PMO010551	FSD1L	110.223	0.878819	0.230921	-3.80595	0.000141259	0.00341275
PMO013973	GCP6	20.9174	0.882723	0.299095	-2.94131	0.0032683	0.0360404
PMO006341	S30LB	56.2853	0.885802	0.204064	-4.33756	1.44072e-05	0.000569023
PMO007269	RBM38	409.911	0.886163	0.26287	-3.37285	0.000743944	0.0122223
PMO009175	RPOM	92.387	0.886934	0.232961	-3.80515	0.000141719	0.0034148
PMO006818	PRDX3	746.399	0.887795	0.246982	-3.59627	0.000322807	0.00660445
PMO007563	MUC18	265.407	0.89064	0.264893	-3.36295	0.000771138	0.0125763
PMO011867	TXLNB	111.516	0.891689	0.283432	-3.1456	0.00165746	0.0222399
PMO009923	DS13B	23.2271	0.892394	0.227722	-3.91136	9.17775e-05	0.00250362
PMO015448	CSRP1	58.9469	0.894907	0.260195	-3.44112	0.000579322	0.0101594
PMO015831	MYOME	932.207	0.895301	0.196904	-4.54706	5.43993e-06	0.000270034
PMO006446	NDST1	94.4429	0.895522	0.28105	-3.18441	0.00145051	0.0204286
PMO011856	TUB	12.4837	0.898113	0.311836	-2.85969	0.00424049	0.0425275
PMO002229	TFB2M	212.874	0.8982	0.25199	-3.56545	0.000363231	0.00722011
PMO010053	HDHD2	21.0247	0.899594	0.267415	-3.35508	0.000793422	0.0127792
PMO001535	RADI	360.726	0.902538	0.316116	-2.86093	0.00422399	0.0425275
PMO006282	VIP1	55.5077	0.904968	0.260266	-3.4722	0.000516206	0.00924895
PMO000628	ASB14	70.5163	0.908634	0.312397	-4.69232	2.70122e-06	0.000153362
PMO009862	AES	261.4	0.909029	0.257193	-3.53694	0.000404786	0.00785457
PMO015821	IGFN1	894.009	0.914043	0.302368	-3.02752	0.00246566	0.0297884
PMO005987	ACTS	47418.8	0.914893	0.312019	-2.9376	0.00330768	0.0363494
PMO013793	MYOM1	575.03	0.916042	0.273045	-3.3577	0.000785947	0.0127332
PMO000693	ACOX2	190.986	0.91613	0.218653	-4.18955	2.79514e-05	0.00101564
PMO008652	ARHG9	44.6023	0.917147	0.265369	-3.45238	0.000555663	0.00985868
PMO012901	NNRD	33.1061	0.919899	0.29079	-3.16787	0.00153562	0.0210758
PMO007287	NELFD	96.6614	0.920854	0.218523	-4.21178	2.53367e-05	0.000935606
PMO002209	SRBD1	19.4945	0.921237	0.319984	-2.87175	0.00408206	0.0417584
PMO008235	BT1A1	17.2753	0.921621	0.329575	-2.79466	0.0051954	0.0487652
PMO000460	BZW2	151.162	0.927285	0.290817	-3.19351	0.00140552	0.0200122
PMO012571	RNFT1	19.0501	0.927833	0.269706	-3.43666	0.000588944	0.010249
PMO009590	FZD9	752.867	0.931967	0.304289	-3.06736	0.00215962	0.0270593
PMO013854	DOPD	31.6488	0.932676	0.308515	-3.02055	0.0025232	0.0300797
PMO004258	TNNC2	3282.78	0.935905	0.303004	-3.09361	0.00197736	0.0251927
PMO002307	DAPLE	101.319	0.941007	0.324613	-2.90586	0.00366251	0.0390496
PMO012563	AKAP1	197.981	0.943	0.27994	-3.36983	0.000752147	0.0123108
PMO010528	MCAF1	118.517	0.943412	0.226898	-4.15729	3.22043e-05	0.00112086
PMO013781	F210A	157.479	0.943961	0.332647	-2.84578	0.00443032	0.0438877
PMO008326	TCPB	61.7826	0.948538	0.266923	-3.54867	0.000387177	0.00754747
PMO003420	BRNP2	60.6508	0.951114	0.337298	-2.82533	0.00472312	0.0457408
PMO009412	THNS2	25.2733	0.953163	0.3161	-3.02448	0.00249059	0.0297884
PMO013966	AADAT	34.9968	0.957926	0.314539	-3.04643	0.0023158	0.0286603
PMO002491	NDUV2	1217.31	0.95926	0.298533	-3.2182	0.00129	0.0187794
PMO003115	FHL3	301.388	0.959833	0.327967	-2.93446	0.00334127	0.0366207
PMO001201	COMT	50.1382	0.961826	0.258129	-3.7269	0.000193848	0.00432265
PMO001230	PPIG	68.808	0.96212	0.235755	-4.08005	4.50257e-05	0.00144019
PMO002140	PUA1A	1244.33	0.962467	0.284066	-3.39183	0.000694265	0.0115621
PMO008748	MAP7	44.8221	0.966931	0.278392	-3.47334	0.000514022	0.00922801
PMO008382	AHSA2	196.082	0.972299	0.282626	-3.44443	0.000572261	0.0100791
PMO001821	LACE1	17.1272	0.973772	0.26006	-3.72651	0.000194148	0.00432265
PMO012535	MY18A	248.84	0.980911	0.256186	-3.82914	0.000128593	0.00317454
PMO007516	DIXC1	1780.86	0.983878	0.298209	-3.30427	0.000952229	0.0148626
PMO000300	NDE1	39.7205	0.984227	0.343696	-2.86954	0.00411065	0.0418623
PMO013904	GATB	138.884	0.985184	0.213116	-4.62296	3.78295e-06	0.000203218
PMO012226	P2RX1	4.41147	0.996004	0.351339	-2.78988	0.00527274	0.0490418
PMO002720	EMAL4	22.8574	0.996662	0.357015	-2.78548	0.00534486	0.0495436
PMO012411	KPCA	29.7504	0.998752	0.343937	-2.89602	0.00377928	0.0399535
PMO006470	TNNC1	10780.8	0.999215	0.301126	-3.32371	0.000888282	0.0140089
PMO014631	ZMAT4	7.66005	1.00118	0.331173	-3.01973	0.00253002	0.0300912
PMO007176	MTHSD	6.11568	1.00248	0.339349	-2.90809	0.00363638	0.0388622
PMO010555	ZN462	19.9622	1.00315	0.358793	-2.79065	0.00526025	0.0490093
PMO015461	AA1R	17.6575	1.00965	0.317771	-3.17421	0.00150248	0.0208056
PMO009669	TNNI2	11093.6	1.01601	0.296802	-3.42848	0.000606982	0.0103449
PMO002594	AHDC1	29.0833	1.0193	0.346541	-2.93745	0.00330922	0.0363494
PMO009712	P2RY2	62.7508	1.01965	0.3521	-2.90106	0.00371897	0.0394663
PMO009878	SAFB1	330.287	1.01975	0.256364	-3.98059	6.87451e-05	0.00201445
PMO011951	NMDE3	100.7	1.02025	0.31131	-3.27937	0.00104039	0.0159374
PMO002613	AFF1	67.2759	1.02132	0.36506	-2.80695	0.00500128	0.04761
PMO007215	PEPL1	98.5097	1.02497	0.224592	-4.56092	5.0931e-06	0.000255612
PMO012838	KLH34	155.16	1.02604	0.343776	-2.99506	0.00274393	0.0318338
PMO014915	REEP1	26.7745	1.02651	0.300848	-3.40597	0.000659286	0.0110753
PMO014077	PLCB	96.9354	1.0332	0.30427	-3.39554	0.00068493	0.0114373
PMO004231	NR4A1	861.29	1.03337	0.367403	-2.83388	0.00459872	0.0449675
PMO009044	PCOC2	12.0896	1.03404	0.343298	-2.99593	0.00273612	0.0317838
PMO010807	PLXA4	10.7482	1.03468	0.372466	-3.58445	0.000337784	0.00683392
PMO001165	TDT	2.40462	1.03602	0.364586	-3.51994	0.000431637	0.00815175
PMO008591	STK11	242.222	1.03652	0.277035	-3.74577	0.00017984	0.00409439
PMO014629	ANXA4	18.5945	1.03726	0.335076	-3.1062	0.00189506	0.0245574
PMO012086	AP4S1	2.94821	1.04181	0.396646	-2.84828	0.00439565	0.0436872
PMO014000	PRIC1	15.6795	1.04264	0.360605	-2.87233	0.00407457	0.0417288
PMO003873	AMYP	27.7617	1.04316	0.363017	-2.88695	0.00388997	0.040542
PMO012383	K0195	52.5443	1.04339	0.269426	-3.86635	0.000110478	0.00285108
PMO009123	M3K4	55.1966	1.04559	0.366455	-2.87	0.00410467	0.0418483
PMO012111	TMM62	28.9957	1.04716	0.330526	-3.16788	0.00153553	0.0210758
PMO006913	NDUB5	1376.22	1.04887	0.299736	-3.50527	0.000456147	0.00842343
PMO004015	PARVB	21.6533	1.05114	0.296922	-3.52287	0.000426896	0.00811281
PMO011998	TIMP2	495.743	1.05322	0.208335	-5.05541	4.29467e-07	3.42217e-05
PMO001232	PPTC7	132.314	1.05493	0.359723	-2.94543	0.00322511	0.0357716
PMO001141	SLK	149.163	1.05514	0.362816	-2.92627	0.00343058	0.0373214
PMO014616	ZMIZ2	51.4237	1.05518	0.343841	-3.08027	0.00206812	0.0259845
PMO007767	CCD80	15.9525	1.05612	0.355729	-2.97336	0.00294557	0.033609
PMO006447	S36A1	34.2385	1.05659	0.37378	-2.83217	0.00462339	0.0451601
PMO010808	PLXA4	2.86904	1.05803	0.382748	-2.94377	0.0032424	0.0358757
PMO014919	FGRL1	76.0942	1.05834	0.363413	-2.92541	0.00344002	0.0373794
PMO006206	RASLC	11.6229	1.05881	0.351296	-3.00136	0.00268773	0.0315443
PMO013501	PGS2	94.7899	1.06005	0.340435	-3.12117	0.00180133	0.0236806
PMO003825	NS1BP	1683.27	1.0638	0.255947	-4.15924	3.19308e-05	0.00111992
PMO003892	ODR4	12.3825	1.06385	0.330407	-3.20284	0.00136078	0.0195068
PMO015921	OSGI2	7.14509	1.06406	0.345229	-3.07214	0.00212528	0.0266658
PMO000923	FA13B	189.336	1.06599	0.291071	-3.66462	0.000247708	0.00531957
PMO014235	COX5B	2.76781	1.06898	0.389486	-2.92831	0.00340807	0.037121
PMO002039	CSTN3	16.29	1.06916	0.382899	-2.80468	0.00503663	0.0477586
PMO008329	PUS10	5.93379	1.06938	0.363489	-2.88678	0.00389206	0.040542
PMO009656	TNNT3	25102.6	1.06938	0.233347	-4.58481	4.54396e-06	0.000233205
PMO004729	WNK2	94.1343	1.07122	0.288992	-3.70484	0.000211526	0.00463882
PMO011437	SPEG	2071.21	1.07187	0.328454	-3.27334	0.00106286	0.0161728
PMO013000	PKDRE	4.47271	1.07221	0.386969	-3.17862	0.00147976	0.0206484
PMO011432	MYO10	14.8574	1.07233	0.305579	-3.48427	0.000493473	0.00892971
PMO000081	TMC7	16.1907	1.07234	0.316644	-3.36316	0.000770545	0.0125763
PMO001064	F10C1	18.3786	1.0726	0.319332	-3.35952	0.00078078	0.0126889
PMO016353	CD029	18.1002	1.07523	0.358942	-2.99355	0.00275748	0.0319095
PMO014563	UGPA	5895.87	1.07674	0.195419	-5.51087	3.57074e-08	4.26798e-06
PMO002188	COX7R	9.58683	1.07859	0.399116	-2.7926	0.00522863	0.0488925
PMO000496	ZMY11	62.1076	1.08165	0.297726	-3.63108	0.000282243	0.00588989
PMO015031	ANO8	118.237	1.08862	0.319409	-3.4102	0.000649162	0.0109406
PMO015491	NFL	40.2598	1.08904	0.371087	-2.95693	0.0031072	0.0348284
PMO011387	TRAK2	80.9567	1.0892	0.395217	-2.81342	0.00490176	0.0470045
PMO001662	HMCN2	23.6976	1.08955	0.400566	-2.81002	0.00495378	0.047269
PMO010883	PLCE	92.4896	1.09263	0.252158	-4.33321	1.4695e-05	0.000577874
PMO013740	EYA1	26.0802	1.09393	0.377511	-2.91488	0.00355826	0.0382976
PMO003875	GPSM2	13.4852	1.09575	0.281308	-3.87962	0.000104621	0.00273883
PMO008324	STUM	1.77369	1.09782	0.381033	-3.28409	0.00102312	0.0156993
PMO004555	CHD6	59.8285	1.10024	0.355422	-3.10022	0.00193377	0.0248881
PMO015678	HBB	15653.6	1.10184	0.356577	-3.10962	0.00187331	0.0244076
PMO004670	HEMGN	53.0525	1.10548	0.330398	-3.3466	0.000818104	0.0130839
PMO007107	F192A	6.37041	1.10625	0.368408	-3.01546	0.00256587	0.0304286
PMO013067	LYRM5	6.94472	1.10654	0.392474	-2.85972	0.0042402	0.0425275
PMO002174	RNF8	139.376	1.10732	0.310817	-3.56838	0.000359193	0.00718703
PMO001024	SPRC	112.112	1.10763	0.283831	-3.90257	9.51768e-05	0.00255795
PMO000840	HOME2	177.859	1.10868	0.316193	-3.51648	0.000437317	0.00821495
PMO007675	ATP9A	5.64507	1.11067	0.372404	-2.95047	0.00317293	0.0354467
PMO005287	NAL12	4.88085	1.11361	0.399714	-2.82326	0.00475385	0.0459404
PMO015610	NUD17	2.94504	1.11694	0.400574	-2.79584	0.00517653	0.0487291
PMO008877	KCNT1	2.87129	1.12338	0.391739	-2.95001	0.00317761	0.0354467
PMO004408	ENPP4	114.399	1.12382	0.296831	-3.78788	0.000151935	0.00358488
PMO008404	IP3KB	57.9722	1.12532	0.313754	-3.58261	0.00034018	0.0068671
PMO007806	ABHDA	60.0496	1.12575	0.254607	-4.42174	9.79085e-06	0.000431748
PMO004349	CTNA3	2.96346	1.1263	0.39366	-2.8537	0.00432133	0.0431374
PMO001428	MKNK1	121.667	1.12695	0.300106	-3.75818	0.000171155	0.00395491
PMO016075		51.8944	1.12794	0.295285	-3.81584	0.000135719	0.00330528
PMO007651	PDS5B	99.2011	1.13169	0.366697	-3.1076	0.00188615	0.0244768
PMO002299	PTN21	95.7107	1.13278	0.365908	-3.11253	0.00185488	0.0243142
PMO009643	ODF2L	3.46981	1.13463	0.400679	-2.80431	0.00504245	0.047764
PMO003946	CLCF1	4.414	1.13497	0.384758	-2.90115	0.00371795	0.0394663
PMO002490	ANR12	385.04	1.13503	0.322519	-3.52958	0.000416227	0.00802762
PMO002703	RBSK	21.401	1.13626	0.325974	-3.48428	0.000493464	0.00892971
PMO007827	S2533	91.1502	1.13729	0.231636	-4.90796	9.20264e-07	6.28547e-05
PMO005039	CADH8	5.30574	1.13816	0.396343	-2.89291	0.00381692	0.0401356
PMO008454	TB22A	34.6108	1.14036	0.349506	-3.26542	0.00109303	0.0164935
PMO008853	TRAK1	439.098	1.14086	0.326272	-3.50697	0.000453248	0.00840266
PMO012339	YPEL2	2.34138	1.14233	0.391315	-2.82163	0.00477803	0.046076
PMO014529	MDHC	3060.94	1.14372	0.227015	-5.04011	4.65268e-07	3.56269e-05
PMO007025	CX7A2	460.741	1.14733	0.243896	-4.70674	2.51709e-06	0.000146572
PMO013757	F92A1	7.98767	1.14771	0.344903	-3.33002	0.000868392	0.013767
PMO006109	CLIP4	207.926	1.14826	0.361177	-3.1995	0.00137666	0.0196938
PMO006125	AP3B2	8.8154	1.14995	0.382699	-3.02122	0.00251762	0.0300526
PMO007547	C1QT5	3.13829	1.15247	0.395896	-2.86446	0.00417724	0.0422562
PMO001783	PITM2	159.073	1.15407	0.369349	-3.14888	0.00163899	0.0220246
PMO006099	LDHA	1442.43	1.1541	0.256606	-4.50084	6.76868e-06	0.000316942
PMO008612	ASB12	946.161	1.15622	0.312682	-3.70641	0.00021022	0.00462382
PMO007702	SRMS	2.61447	1.15932	0.396179	-2.87628	0.00402396	0.0413503
PMO003974	LIGO1	375.855	1.16329	0.337715	-3.45812	0.000543951	0.00966977
PMO016125	NEGR1	4.28052	1.1641	0.379604	-2.99653	0.00273069	0.0317613
PMO002744	CCR10	3.01772	1.1688	0.397357	-2.93114	0.00337718	0.0368468
PMO002493	LRC30	3.15013	1.16904	0.39544	-3.0814	0.00206031	0.0259222
PMO011519	SATB2	11.2537	1.16906	0.389867	-2.99904	0.00270834	0.0315822
PMO006960	KCAB1	9.98422	1.17108	0.332268	-3.4932	0.00047727	0.00876473
PMO010315	BROMI	3.02547	1.17457	0.374028	-3.04529	0.00232453	0.0286903
PMO002828	ANDR	21.2031	1.17637	0.392409	-3.03066	0.00244023	0.0295955
PMO012798	CDN2C	10.1197	1.17896	0.32379	-3.59491	0.000324507	0.00662432
PMO008777	PACN1	1.70433	1.18007	0.400657	-2.84506	0.00444032	0.04392
PMO015223	ANK3	152.779	1.1852	0.300544	-3.94758	7.89454e-05	0.00223408
PMO015033	RAB3A	16.412	1.18542	0.383107	-3.13676	0.00170829	0.0227616
PMO008439	PPR3A	493.927	1.18677	0.337778	-3.52779	0.000419051	0.00805512
PMO004187	ACBG2	133.958	1.19006	0.374229	-3.21364	0.00131066	0.0189889
PMO004267	JPH2	132.845	1.19207	0.39847	-3.09418	0.00197356	0.0251795
PMO001523	MIPEP	224.355	1.19224	0.206911	-5.76291	8.26772e-09	1.2949e-06
PMO008680	CD38	5.91839	1.19424	0.388603	-3.04225	0.00234821	0.0288258
PMO005940	LAR4B	77.1024	1.19682	0.38707	-3.13666	0.00170886	0.0227616
PMO006832	KAZD1	6.5796	1.19755	0.4003	-3.00168	0.00268491	0.0315443
PMO008514	PHF13	143.041	1.19878	0.250094	-4.79374	1.63702e-06	9.98031e-05
PMO007978	CP2D4	5.87872	1.19909	0.397653	-3.01262	0.00259007	0.0306356
PMO004597	GPDA	167.062	1.19947	0.264613	-4.5339	5.79046e-06	0.000281286
PMO000811	ITA11	7.34643	1.20117	0.399577	-3.02606	0.00247762	0.0297884
PMO000520	NR1D2	45.7624	1.20177	0.38516	-3.15245	0.00161909	0.0218541
PMO001870	CF165	4.40498	1.2022	0.383677	-3.05453	0.00225413	0.02805
PMO011472	STEA3	24.9733	1.20529	0.309499	-3.88986	0.000100301	0.00265636
PMO001584	KDEL2	11.7662	1.20825	0.400533	-3.10014	0.00193428	0.0248881
PMO011786		2.98864	1.20829	0.395352	-3.01964	0.00253079	0.0300912
PMO009102	SRSF7	121.22	1.21032	0.305662	-3.9654	7.32721e-05	0.00210634
PMO009324	ORNT1	94.1275	1.21856	0.300678	-4.06061	4.89445e-05	0.00153314
PMO010453	ADPRM	64.495	1.22359	0.262583	-4.65846	3.1859e-06	0.00017755
PMO013063	CECR5	8.34637	1.23105	0.388708	-3.12222	0.00179494	0.0236308
PMO000537	SELO	7.00467	1.23192	0.36959	-3.30984	0.000933503	0.0146206
PMO010056	SIA8E	1.60199	1.23254	0.391241	-3.1684	0.00153281	0.0210758
PMO014504		7.01397	1.23308	0.391958	-3.17695	0.00148833	0.0206872
PMO000426	FYCO1	1424.7	1.23949	0.327784	-3.79513	0.000147566	0.00352191
PMO004328	MAOM	76.4259	1.23979	0.392966	-3.22384	0.00126482	0.0184721
PMO007059	LAMA4	19.426	1.24095	0.373664	-3.32445	0.000885916	0.0139959
PMO006180	ATL3	7.96515	1.24225	0.389106	-3.15172	0.00162311	0.0218758
PMO012568	CLU	844.952	1.2431	0.241215	-5.15557	2.52864e-07	2.18763e-05
PMO010249	TARSH	75.429	1.24806	0.317905	-3.92851	8.54744e-05	0.00239645
PMO012671	NETO2	2.95584	1.24897	0.39838	-3.20507	0.00135032	0.0194394
PMO008385	PLCB1	43.0699	1.24933	0.287877	-4.33192	1.47816e-05	0.000578777
PMO014021	ATS20	2.95861	1.2501	0.398074	-3.14431	0.00166477	0.0223049
PMO014718	MOGT1	8.82151	1.25021	0.360549	-3.43138	0.000600513	0.0103073
PMO007662	TM135	23.5278	1.25043	0.343565	-3.63066	0.000282694	0.00588989
PMO006932	P63	5.16901	1.25168	0.387754	-3.17941	0.00147575	0.0206484
PMO009362	RM13	5.84464	1.2529	0.400677	-3.27333	0.00106288	0.0161728
PMO001776	RIPL1	362.823	1.25516	0.345596	-3.65159	0.000260625	0.00554191
PMO004998	CADM3	36.87	1.25971	0.385356	-3.29834	0.000972566	0.0151102
PMO007011	MCE1	15.3368	1.2637	0.30453	-4.11613	3.8529e-05	0.00126811
PMO007044	KLH31	211.036	1.26906	0.399366	-3.31909	0.000903102	0.0142162
PMO014714	ZBT38	101.656	1.27055	0.324445	-3.92316	8.73944e-05	0.0024204
PMO006600	SEM3D	13.4735	1.27185	0.361029	-3.50951	0.000448932	0.00835169
PMO002853	TM182	75.7354	1.28074	0.308005	-4.15996	3.18298e-05	0.00111992
PMO007050	NDUF4	59.3211	1.28968	0.343869	-3.77157	0.000162223	0.00379802
PMO002436	FNBP1	118.991	1.28972	0.33601	-3.84935	0.000118431	0.00299673
PMO001985	CBPC1	103.326	1.28997	0.340714	-3.79815	0.000145782	0.00350339
PMO010104	PRELP	25.6906	1.29071	0.376218	-3.44852	0.00056366	0.00996164
PMO011480	NXPH2	3.0145	1.29122	0.392496	-3.17191	0.00151439	0.0209069
PMO007048	GSTA3	23.7767	1.29128	0.356098	-3.62054	0.00029399	0.00609727
PMO013829	RTN4R	1.80759	1.29181	0.400245	-3.24803	0.00116207	0.017277
PMO007775	POPD2	41.2552	1.29783	0.342398	-3.79488	0.000147715	0.00352191
PMO008603	TRPC5	3.34442	1.30276	0.400575	-3.30182	0.0009606	0.0149676
PMO000524	EIF1B	11.0556	1.30306	0.336505	-3.83005	0.000128116	0.00317454
PMO012254	PEDF	34.9008	1.30656	0.335383	-3.90318	9.49368e-05	0.00255795
PMO003450	RORB	10.1021	1.3107	0.387682	-3.35671	0.000788763	0.0127493
PMO012003	DIC	163.983	1.31088	0.31359	-4.1858	2.84157e-05	0.0010284
PMO000202	GPC5B	77.439	1.31265	0.399774	-3.43786	0.000586329	0.0102427
PMO007854	AGRL3	2.91886	1.31499	0.400543	-3.2138	0.00130993	0.0189889
PMO008535	GBRD	3.42578	1.31604	0.39032	-3.28544	0.00101822	0.0156993
PMO001060	HECD2	3.59612	1.31667	0.400217	-3.23233	0.00122787	0.018119
PMO001502	P85A	21.7218	1.32671	0.324189	-4.07779	4.54654e-05	0.00144408
PMO009584	MMRN2	24.693	1.32731	0.34108	-3.8772	0.000105665	0.00275822
PMO000854	CBPC4	3.40341	1.32931	0.400161	-3.25298	0.00114201	0.0171471
PMO007962	MYG	10002.6	1.33435	0.350954	-3.82912	0.000128603	0.00317454
PMO005902	HXA10	18.7519	1.33949	0.327642	-4.0695	4.7115e-05	0.00149126
PMO007990	PMM1	40.2859	1.33973	0.341942	-3.91568	9.01496e-05	0.00247807
PMO002000	GTPB8	25.5505	1.34666	0.260825	-5.1307	2.88663e-07	2.42798e-05
PMO008108	RHES	3.65142	1.34802	0.38897	-3.3831	0.000716729	0.0118378
PMO003614	LUZP2	17.792	1.34872	0.311616	-4.31253	1.61398e-05	0.000623889
PMO006078	K0408	54.2679	1.35279	0.400226	-3.56172	0.000368428	0.00726478
PMO001255	AACS	22.4262	1.35518	0.262175	-5.13297	2.85198e-07	2.42125e-05
PMO005338	M21D2	10.2467	1.35538	0.366224	-3.68425	0.000229374	0.00496104
PMO002463	PLD3A	23.3914	1.35736	0.358862	-3.78995	0.000150677	0.00356446
PMO012395	TOB1	575.391	1.36737	0.275126	-4.97654	6.4731e-07	4.63005e-05
PMO012345	DHR11	7.37717	1.37289	0.392197	-3.49159	0.000480155	0.00878944
PMO011619	GP155	71.4341	1.37783	0.344762	-4.00707	6.14763e-05	0.00183099
PMO000125	PITC1	59.972	1.385	0.347864	-3.99133	6.57029e-05	0.00193781
PMO000107	HBAD	2630.76	1.38969	0.345252	-4.05139	5.09153e-05	0.00157855
PMO009972	P3C2B	185.096	1.39124	0.338986	-4.12246	3.74854e-05	0.00125541
PMO014684	NUDT3	25.0933	1.39582	0.360307	-3.8804	0.000104286	0.00273797
PMO012622	MAF	7.67663	1.39749	0.364548	-3.772	0.000161943	0.00379802
PMO002235	FLVC1	42.3617	1.40367	0.3633	-3.87351	0.00010728	0.00279234
PMO013626	DVL1	82.2453	1.40426	0.325645	-4.31393	1.60375e-05	0.000622584
PMO002051	F162A	93.9332	1.40572	0.298642	-4.71354	2.43454e-06	0.00014268
PMO014434	TETN	8.87538	1.40681	0.353428	-3.92892	8.53292e-05	0.00239645
PMO007518	HSPB2	61.9175	1.41235	0.323529	-4.37628	1.20723e-05	0.000493987
PMO002289	ASB2	514.108	1.42096	0.377358	-3.82531	0.00013061	0.00320665
PMO011608	TITIN	511.313	1.42227	0.286752	-4.96828	6.75496e-07	4.79092e-05
PMO012811	CP4B1	12.4537	1.42402	0.395704	-3.68615	0.000227669	0.00494772
PMO006289	RAM	4.93237	1.42519	0.397252	-3.57283	0.000353138	0.00709713
PMO000064	MRM2	11.6734	1.42823	0.353346	-4.04067	5.32998e-05	0.00161392
PMO013070	CCD91	20.6513	1.42987	0.33488	-4.28712	1.81005e-05	0.000687971
PMO009718	SERPH	58.8256	1.43018	0.34396	-4.16981	3.0485e-05	0.00108174
PMO004413	UCP4	15.74	1.4304	0.325394	-4.34929	1.3658e-05	0.000548981
PMO004834	MYH4	2860.11	1.43178	0.334186	-4.30683	1.65609e-05	0.000637455
PMO000473	ASB4	175.851	1.43699	0.287641	-4.9999	5.73595e-07	4.16843e-05
PMO015162	GDF8	25.2064	1.43709	0.361424	-3.97639	6.99684e-05	0.00203282
PMO003836	GT252	28.8777	1.44254	0.293983	-4.87804	1.07145e-06	7.15663e-05
PMO009137	GALM	31.1037	1.44526	0.285654	-5.03952	4.66711e-07	3.56269e-05
PMO007369	GRM1B	34.4012	1.44868	0.31246	-4.62441	3.75665e-06	0.000203128
PMO000354	ELFN1	2.72518	1.45029	0.39511	-3.43214	0.000598838	0.0103073
PMO009740	AMPD1	474.12	1.45721	0.332632	-4.40341	1.06561e-05	0.000454459
PMO008798	GUC1B	18.9754	1.46136	0.34428	-4.26741	1.97754e-05	0.000745394
PMO007973	NDUA6	118.321	1.4627	0.391264	-3.85432	0.000116052	0.0029451
PMO008917	ASB10	134.475	1.46855	0.33461	-4.40937	1.03673e-05	0.000446336
PMO006197	SYNEM	456.147	1.48025	0.344921	-4.31871	1.56944e-05	0.000611879
PMO000123	RFIP3	50.9689	1.48034	0.287584	-5.13501	2.82135e-07	2.41784e-05
PMO011584	PLCL1	38.8068	1.48332	0.360283	-4.13452	3.5569e-05	0.0012147
PMO003879	DEN1B	10.3171	1.48444	0.3871	-3.79683	0.000146556	0.00351269
PMO012765	ACO11	250.803	1.49109	0.343896	-4.36322	1.28164e-05	0.000518652
PMO008459	TM117	37.2655	1.49357	0.247995	-6.00254	1.94254e-09	4.01046e-07
PMO004218	S43A3	6.41377	1.50128	0.390821	-3.75762	0.000171536	0.00395491
PMO006847	LGI1	15.2854	1.50185	0.383062	-3.9298	8.50161e-05	0.00239645
PMO002150	CP46A	25.1511	1.50279	0.315569	-4.75535	1.98101e-06	0.000117618
PMO006057	GTR12	16.0054	1.50731	0.379323	-3.97886	6.92468e-05	0.00202263
PMO003931	MPSF	1050.86	1.50923	0.314627	-4.81307	1.48631e-06	9.30339e-05
PMO003462	KLH24	14.7724	1.51215	0.320512	-4.66728	3.05207e-06	0.000171142
PMO006936	CCD50	49.4313	1.52495	0.372484	-4.12833	3.65409e-05	0.00124321
PMO000645	GRIP2	2.7904	1.52552	0.391077	-4.4198	9.87921e-06	0.000432316
PMO006857	GPAT1	284.13	1.53051	0.388648	-4.04913	5.1409e-05	0.00158233
PMO003055	CNTP1	17.5198	1.53122	0.391433	-3.95985	7.4996e-05	0.00214234
PMO015343	NIN	12.1189	1.53253	0.346072	-4.3714	1.23452e-05	0.000502888
PMO016065	NPFF1	4.75254	1.53659	0.400615	-3.84368	0.000121204	0.00305838
PMO006850	EXOC6	30.4366	1.54211	0.349167	-4.40712	1.04756e-05	0.00044887
PMO002892	NRSN1	5.65141	1.55835	0.393372	-3.91456	9.05679e-05	0.00247807
PMO012793	AAPK2	24.181	1.56359	0.396225	-4.04993	5.12334e-05	0.00158233
PMO006381	S26A2	2.07535	1.5641	0.400571	-3.75643	0.000172354	0.00395572
PMO007040	DYST	616.519	1.56489	0.268114	-5.84244	5.14423e-09	8.81702e-07
PMO001898	FRMD3	21.9559	1.57101	0.400679	-4.26922	1.96159e-05	0.000742462
PMO001323	TNIK	294.677	1.57114	0.324475	-4.85953	1.17666e-06	7.68976e-05
PMO011384	RFTN2	16.7428	1.576	0.35615	-4.384	1.1652e-05	0.000483692
PMO010638	MEF2C	7.2627	1.58448	0.395481	-3.94831	7.8706e-05	0.00223408
PMO009385	SMYD1	587.114	1.58685	0.211046	-7.52065	5.45034e-14	4.50099e-11
PMO003296	BODG	131.538	1.5869	0.250391	-6.33531	2.36858e-10	6.72382e-08
PMO003240	SH3BG	213.133	1.58718	0.258577	-6.14212	8.14276e-10	1.86869e-07
PMO014113	5NT1A	148.893	1.58784	0.307071	-5.17484	2.28103e-07	2.01174e-05
PMO012748	RAD54	31.7815	1.59215	0.347485	-4.59292	4.37078e-06	0.000228185
PMO014310	ZBT47	24.0915	1.59337	0.295294	-5.36551	8.07189e-08	8.52617e-06
PMO010439	MET7A	38.059	1.59705	0.317333	-5.01511	5.3004e-07	3.91454e-05
PMO012023	EPN3	21.0898	1.59952	0.329534	-4.80915	1.51574e-06	9.30339e-05
PMO005879	DPS1	23.7942	1.61126	0.275423	-5.81825	5.94658e-09	9.82158e-07
PMO003332	E41LB	14.7974	1.61216	0.395958	-4.18379	2.86687e-05	0.00103344
PMO016594		92.2594	1.62328	0.363576	-4.50987	6.48686e-06	0.000305319
PMO015030	ABHD8	5.82626	1.62478	0.399982	-4.11384	3.89125e-05	0.0012761
PMO000047	KCJ12	16.4371	1.62933	0.399981	-4.23913	2.24388e-05	0.000835386
PMO015743	PROB1	5.78102	1.64039	0.377968	-4.2269	2.36938e-05	0.000878508
PMO009127	GRP3	14.1664	1.65153	0.327074	-5.00427	5.60737e-07	4.10785e-05
PMO013620	PERM1	511.64	1.66096	0.369342	-4.56671	4.95429e-06	0.000250026
PMO000211	HBA	3897.3	1.6707	0.17997	-6.14201	8.14818e-10	1.86869e-07
PMO013291	CAH9	27.4142	1.67531	0.290486	-5.74272	9.3167e-09	1.43446e-06
PMO002851	GP174	6.1457	1.6785	0.398033	-4.5195	6.19859e-06	0.000296358
PMO015970	UPP2	43.921	1.67973	0.289353	-5.79598	6.79228e-09	1.08247e-06
PMO009451	SEM3C	23.4038	1.68011	0.395923	-4.37905	1.192e-05	0.000489962
PMO009914	DUPD1	9.86629	1.68818	0.390002	-4.36271	1.28464e-05	0.000518652
PMO013449	MTUS1	11.5318	1.69681	0.39947	-4.34476	1.39428e-05	0.000556578
PMO015771	TDH	262.63	1.71953	0.394446	-4.57071	4.86071e-06	0.000246674
PMO015701	NOCT	73.9764	1.71986	0.273506	-6.27711	3.44922e-10	8.70353e-08
PMO011550	PLCD4	45.1035	1.72055	0.31047	-5.53204	3.16522e-08	3.93875e-06
PMO009020	PAQR9	20.4034	1.73299	0.400147	-4.82231	1.41907e-06	9.07806e-05
PMO000338		21.652	1.73611	0.358111	-4.86208	1.16159e-06	7.6463e-05
PMO006689	ZN106	326.247	1.7419	0.327794	-5.33803	9.39615e-08	9.39545e-06
PMO002722	ERR3	62.7724	1.74929	0.298435	-5.84301	5.12668e-09	8.81702e-07
PMO015321	TRHY	4.30338	1.76041	0.397428	-4.33924	1.42977e-05	0.000567163
PMO009717	TR19L	32.0245	1.76302	0.377363	-4.70397	2.55156e-06	0.000147633
PMO012340	WSCD1	7.56893	1.7635	0.372319	-4.62186	3.80306e-06	0.000203218
PMO011695	BIN1	214.238	1.76837	0.325006	-5.46026	4.75429e-08	5.60883e-06
PMO014861	CERS2	69.6013	1.77073	0.303391	-5.8258	5.684e-09	9.56175e-07
PMO015964	SCN2A	97.1658	1.77273	0.351966	-5.06786	4.02316e-07	3.2342e-05
PMO013505	BEST3	106.789	1.77382	0.326678	-5.44401	5.20952e-08	5.99029e-06
PMO003894	RING2	30.1729	1.77958	0.365171	-4.87824	1.07037e-06	7.15663e-05
PMO007911	EGF	14.192	1.78434	0.399146	-4.59147	4.40133e-06	0.000228467
PMO014265	SMRD3	22.3028	1.78887	0.304418	-5.80763	6.3362e-09	1.02782e-06
PMO011904	ESR1	7.56244	1.7954	0.399124	-4.45997	8.19725e-06	0.000372319
PMO012456	DRS7C	82.9323	1.79556	0.291843	-6.1501	7.74355e-10	1.86869e-07
PMO012085	AKAP6	59.7116	1.81032	0.383464	-4.81773	1.452e-06	9.15967e-05
PMO000138	S14L5	73.0003	1.83646	0.34464	-5.33773	9.412e-08	9.39545e-06
PMO004871	ZN536	2.43412	1.85274	0.400569	-4.64904	3.33486e-06	0.0001814
PMO012440	MADL2	30.1964	1.86225	0.330349	-5.60648	2.06477e-08	2.71832e-06
PMO006983	S22AG	16.5363	1.88527	0.305524	-6.06468	1.32217e-09	2.79315e-07
PMO003476	NEUR4	6.25575	1.89436	0.378144	-4.77527	1.79469e-06	0.000108205
PMO006546	CAV3	26.0072	1.89764	0.332121	-5.66035	1.51068e-08	2.17826e-06
PMO015813	MYBPH	1293.91	1.9072	0.345612	-5.57466	2.4802e-08	3.12919e-06
PMO007508	SCN4B	5.01231	1.91531	0.369069	-4.88108	1.05505e-06	7.15232e-05
PMO010308	HS3S5	9.42227	1.94584	0.390608	-4.91312	8.96377e-07	6.1687e-05
PMO013759	PDP1	149.57	1.96534	0.371369	-5.38845	7.10697e-08	7.77828e-06
PMO007289	DOK5	18.2081	1.98081	0.370974	-5.33823	9.38578e-08	9.39545e-06
PMO011718	HNMTL	47.4074	1.98121	0.346205	-5.73476	9.76531e-09	1.47847e-06
PMO001668	PPAC3	86.6434	1.98244	0.38824	-5.29161	1.21246e-07	1.1843e-05
PMO003475	G3ST2	5.77509	1.99344	0.400489	-5.05122	4.39008e-07	3.46778e-05
PMO013752	ASPH	33.1071	1.99466	0.378667	-5.37305	7.7414e-08	8.27328e-06
PMO015886	AQP4	12.8329	1.99603	0.39986	-5.58697	2.3107e-08	2.99863e-06
PMO009231	CPZIP	57.5179	1.99803	0.309522	-6.43965	1.1975e-10	3.75106e-08
PMO007772	CASQ2	411.703	2.01111	0.246722	-8.15751	3.42001e-16	6.21347e-13
PMO001352	BCL6	111.169	2.0319	0.342036	-5.97977	2.2345e-09	4.5107e-07
PMO006436	MYOZ3	95.1386	2.06567	0.271144	-7.59596	3.05529e-14	2.82184e-11
PMO000636	KBTBC	13.3697	2.08018	0.399782	-5.36219	8.22194e-08	8.58484e-06
PMO000668	PZRN3	173.888	2.10855	0.317036	-6.67466	2.4781e-11	9.3796e-09
PMO004741	PALMD	120.543	2.1159	0.365106	-5.89443	3.75973e-09	7.11529e-07
PMO009809	SRPK2	50.0986	2.12951	0.339348	-6.3049	2.88378e-10	7.64472e-08
PMO016387	KLH33	115.521	2.18901	0.307798	-7.12271	1.05829e-12	6.40899e-10
PMO006424	MYOTI	679.065	2.19223	0.289552	-7.59381	3.10638e-14	2.82184e-11
PMO006952	NEP	134.826	2.20436	0.341476	-6.49654	8.21873e-11	2.8715e-08
PMO007819	IGS11	8.69833	2.21675	0.393535	-5.35411	8.59772e-08	8.87519e-06
PMO000707	LMOD3	264.039	2.22887	0.320791	-6.98734	2.80146e-12	1.49697e-09
PMO009541	SBK2	28.0788	2.2638	0.383474	-5.95453	2.60823e-09	5.15068e-07
PMO000983		19.7133	2.26983	0.351665	-6.31729	2.66189e-10	7.32746e-08
PMO009488	PRR33	61.7933	2.28803	0.306206	-7.44713	9.53953e-14	7.22143e-11
PMO006336	SYNPO	93.6427	2.29912	0.351142	-6.58464	4.55987e-11	1.65687e-08
PMO008804	WNT2B	28.2735	2.34597	0.359576	-6.45996	1.04728e-10	3.39768e-08
PMO000331	SBK1	53.3513	2.36297	0.345561	-6.82899	8.55155e-12	4.08854e-09
PMO007461	CLCN4	11.1451	2.43055	0.365646	-6.30162	2.94546e-10	7.64472e-08
PMO006826	PPR3C	151.042	2.43936	0.391273	-6.67755	2.42977e-11	9.3796e-09
PMO002439	FA78A	27.3123	2.44206	0.389377	-6.36899	1.90273e-10	5.65994e-08
PMO001992	CLCN1	38.2424	2.45868	0.318234	-7.65069	1.99897e-14	2.26983e-11
PMO016102	MYLK4	146.904	2.57986	0.321503	-8.04743	8.45511e-16	1.2801e-12
PMO003402	NTM1B	36.0182	2.72414	0.394373	-7.2142	5.42526e-13	3.52022e-10
PMO000797	KBTBD	106.063	2.73834	0.346833	-7.95679	1.76559e-15	2.29123e-12
PMO002025	FBX40	155.046	2.8796	0.344824	-8.42472	3.61616e-17	1.09497e-13
PMO009988	KY	46.5899	3.28568	0.394874	-8.49559	1.96934e-17	8.94475e-14

## Sheet: Pa.mo(L) VS. Py.ru
Gene_id	Gene_name	baseMean	log2FoldChange	lfcSE	stat	pvalue	padj
PMO000001	NDUB6	382.045	2.35627	0.305139	-7.71913	1.17125e-14	4.81775e-13
PMO000002	F195A	77.3968	-2.84148	0.631695	4.50376	6.67613e-06	6.09451e-05
PMO000004	RL3L	1461.15	-0.80427	0.326954	2.45971	0.0139047	0.0409797
PMO000008	ERN2	186.942	1.82413	0.360469	-5.05871	4.22094e-07	5.27693e-06
PMO000009	PALB2	86.3827	1.5618	0.387483	-4.03045	5.56708e-05	0.00039875
PMO000010	ACPM	144.131	-2.50071	0.38651	6.46686	1.00061e-10	2.36383e-09
PMO000019	CSKI1	3.15738	2.22129	0.675877	-3.13585	0.00171358	0.0073392
PMO000022	MSB1A	4.24094	3.53186	0.629771	-5.42866	5.67793e-08	8.86247e-07
PMO000033	B9D1	2.49012	1.86345	0.618732	-2.93391	0.00334717	0.012804
PMO000040	PEMT	6.63275	-1.33213	0.484663	2.75071	0.00594655	0.0204704
PMO000043	FLCN	274.628	1.78479	0.24131	-7.39394	1.42542e-13	5.22771e-12
PMO000047	KCJ12	19.5608	2.20385	0.676283	-3.28097	0.00103451	0.0047886
PMO000049	PTCD1	108.071	-1.12121	0.242391	4.62621	3.72426e-06	3.65765e-05
PMO000056	RADIL	16.9477	1.26473	0.472994	-2.66521	0.00769393	0.0253301
PMO000070	BI2L1	27.0013	1.1472	0.358474	-3.19734	0.001387	0.00614368
PMO000074	UBP42	25.136	0.733031	0.288881	-2.53385	0.0112816	0.0345597
PMO000080	GDE1	17.0683	-2.70451	0.37326	7.2041	5.84288e-13	1.97697e-11
PMO000081	TMC7	25.2641	1.53086	0.41755	-3.65346	0.000258732	0.00149276
PMO000088	FOPNL	159.45	1.85209	0.371739	-4.98126	6.31725e-07	7.55548e-06
PMO000090	PDXD1	55.426	0.922863	0.220807	-4.17651	2.96012e-05	0.000230332
PMO000097	LITAF	8.67645	-4.07037	0.50944	7.43049	1.08198e-13	4.01022e-12
PMO000101	UBP7	732.793	0.616425	0.237157	-2.59921	0.00934396	0.0296278
PMO000107	HBAD	2144.14	0.922728	0.375793	-2.45588	0.0140538	0.0413121
PMO000108	TMM8A	102.15	2.42334	0.282899	-8.54806	1.25175e-17	6.69878e-16
PMO000111	ECI1	846.107	-0.808425	0.291942	2.76899	0.00562306	0.0195364
PMO000112	CG026	62.3456	-0.656093	0.234692	2.79613	0.00517194	0.0182532
PMO000114	UBAD1	395.257	-1.15783	0.30205	3.83291	0.000126638	0.000808957
PMO000122	DECR2	81.6878	-0.747679	0.249684	2.99462	0.00274788	0.0108887
PMO000123	RFIP3	71.0675	1.74307	0.389327	-4.4725	7.73093e-06	6.93667e-05
PMO000125	PITC1	94.346	1.99099	0.440454	-4.51625	6.29436e-06	5.79136e-05
PMO000129	RHBL1	7.38327	-1.37112	0.517392	2.64448	0.00818176	0.0266297
PMO000133	F173A	160.116	1.15292	0.38123	-3.0244	0.00249123	0.0100773
PMO000138	S14L5	45.2196	1.07733	0.36632	-2.93626	0.00332193	0.0127213
PMO000140	ANKF1	25.0526	2.09069	0.433576	-4.79013	1.66671e-06	1.78936e-05
PMO000143	NOGG2	10.0361	1.38088	0.547342	-2.50286	0.0123193	0.0370888
PMO000145	VATL	139.143	-1.1817	0.215334	5.4882	4.06041e-08	6.51218e-07
PMO000151	TM204	32.9648	1.168	0.402775	-2.8943	0.00380003	0.014171
PMO000156	RASD1	20.3698	-1.74054	0.449492	3.86306	0.000111975	0.0007268
PMO000159	T184A	3.87751	1.67397	0.595405	-2.77086	0.00559089	0.0194504
PMO000160	TCPR1	81.6437	0.915513	0.360683	-2.53618	0.0112069	0.0343813
PMO000172	MYH11	275.653	2.0195	0.273	-3.98627	6.71205e-05	0.000469039
PMO000177	CCZ1	111.982	-0.62992	0.245736	2.5638	0.0103532	0.0321859
PMO000178	MILK2	44.5936	2.34315	0.353704	-6.58827	4.44985e-11	1.11661e-09
PMO000181	RN216	28.0238	1.77302	0.411311	-4.28692	1.81171e-05	0.000147654
PMO000187	SNR25	39.8449	1.03382	0.318865	-3.24144	0.00118928	0.00538376
PMO000190	GLYC	6.74146	-1.15015	0.453953	2.53234	0.0113303	0.0346585
PMO000191	CTF18	25.7884	1.19887	0.501434	-2.38867	0.0169095	0.0480311
PMO000192	TELO2	41.5019	1.33505	0.302833	-4.39998	1.08262e-05	9.32319e-05
PMO000194	MRP1	2.11391	-1.65779	0.658026	2.47	0.0135114	0.0401022
PMO000196	LYAG	530.493	-0.932335	0.305865	3.04804	0.00230342	0.00939371
PMO000197	RB40C	27.2905	1.18342	0.377688	-3.12596	0.00177226	0.00756892
PMO000199	NSE1	38.1014	-1.27636	0.302305	4.22428	2.3971e-05	0.000190335
PMO000201	VASN	16.7528	1.04316	0.402617	-2.58537	0.00972744	0.0306124
PMO000206	PIGQ	11.6831	1.11042	0.427938	-2.58044	0.00986754	0.0310161
PMO000207	SCNNG	37.9761	-1.68829	0.285741	5.9039	3.55006e-09	6.85757e-08
PMO000211	HBA	13261.8	2.67809	0.349977	-7.65563	1.92362e-14	7.85092e-13
PMO000221	CCNF	18.0787	1.22036	0.300537	-4.04812	5.16307e-05	0.000373228
PMO000222	NHRF2	514.064	1.48637	0.364606	-4.07699	4.56217e-05	0.000335368
PMO000226	IL4RA	462.456	-4.2826	0.331475	12.9053	4.1997e-38	1.10127e-35
PMO000229	COG7	217.971	-0.872657	0.305035	2.86095	0.00422378	0.0155015
PMO000233	TNR6A	98.3061	1.20527	0.312878	-3.84907	0.000118565	0.000764981
PMO000235	LCMT1	63.4936	-0.666241	0.262884	2.53499	0.0112449	0.0344799
PMO000238	LST8	67.4083	-2.74375	0.366627	7.46807	8.13789e-14	3.07045e-12
PMO000240	ALR	7.66091	1.20934	0.421062	-2.85982	0.00423882	0.0155512
PMO000242	TEX2	32.2453	-1.06787	0.373709	2.85558	0.00429581	0.0157273
PMO000243	NARFL	57.9411	-1.24805	0.316498	3.94256	8.06173e-05	0.000546329
PMO000247	LMF1	3.53224	-3.62138	0.604779	5.69046	1.267e-08	2.21493e-07
PMO000251	CML1	1.92124	-1.7043	0.646969	2.59068	0.00957854	0.0302491
PMO000265	BUD31	106.275	-0.772036	0.28198	2.73852	0.00617164	0.0211226
PMO000270	WIPI2	428.416	-1.61932	0.345873	4.68087	2.85663e-06	2.91471e-05
PMO000271	CP3AT	4.05321	-2.8083	0.594917	4.58864	4.46144e-06	4.26915e-05
PMO000272	SDK1	51.7122	1.31656	0.437788	-3.00157	0.00268594	0.0106999
PMO000287	PMS2	66.7733	-0.648994	0.208484	3.11337	0.00184966	0.00783249
PMO000295	ACSM3	60.7837	-1.38063	0.393673	3.50588	0.000455098	0.00239274
PMO000299	MRP1	248.214	1.30294	0.2686	-4.84943	1.23816e-06	1.36706e-05
PMO000300	NDE1	40.5633	0.794915	0.33353	-2.38217	0.0172109	0.0487117
PMO000304	RL1D1	152.677	-0.891111	0.345479	2.5796	0.00989157	0.031073
PMO000305	CPPED	70.964	-0.984218	0.28235	3.4863	0.000489752	0.0025393
PMO000308	RMI2	3.34104	2.77147	0.61532	-4.32166	1.54861e-05	0.000129326
PMO000319	CLCN7	180.059	-0.822483	0.233283	3.52572	0.000422329	0.00224749
PMO000323	HMOX2	531.651	-1.60874	0.298005	5.39767	6.75133e-08	1.01454e-06
PMO000327	CORO7	273.924	-2.95294	0.389928	7.56485	3.88321e-14	1.53124e-12
PMO000330	CLUA1	16.5303	-3.23564	0.455391	7.02015	2.21637e-12	6.87797e-11
PMO000331	SBK1	36.3324	1.96581	0.411637	-4.75683	1.96659e-06	2.08156e-05
PMO000338		17.8554	1.61386	0.343214	-4.68411	2.81182e-06	2.8802e-05
PMO000345	ARC1B	251.598	1.10844	0.412669	-2.68646	0.00722138	0.0239699
PMO000348	GP146	76.5471	-1.30808	0.332674	3.93034	8.48262e-05	0.000571814
PMO000349	E2AK1	84.8588	-0.787279	0.313903	2.50864	0.0121197	0.036614
PMO000352	T159A	25.4321	-1.96772	0.33586	5.85473	4.77779e-09	9.04589e-08
PMO000354	ELFN1	4.93325	2.38644	0.644347	-3.51892	0.00043331	0.00229777
PMO000359		52.6688	-1.36061	0.394126	3.45068	0.000559169	0.00284439
PMO000360	MET22	32.5787	-0.962277	0.327476	2.93895	0.0032933	0.0126516
PMO000364	NDUBA	399.616	-0.862385	0.352433	2.44687	0.0144102	0.0422085
PMO000371		3.27039	1.92229	0.580453	-3.18735	0.00143581	0.00633313
PMO000374	IF140	14.6986	-1.08533	0.423649	2.55837	0.0105164	0.0326062
PMO000377	RBBP6	507.878	0.718153	0.212556	-3.3785	0.000728822	0.00356558
PMO000381	GID4	35.8599	-0.864342	0.272509	3.17216	0.00151311	0.00661017
PMO000382	NPRL3	62.2818	0.911121	0.354881	-2.56791	0.0102313	0.0319107
PMO000383	ERF3A	451.592	-1.63458	0.25266	6.46906	9.86117e-11	2.33485e-09
PMO000384	TM100	15.6551	1.98655	0.519258	-3.79331	0.000148652	0.000927548
PMO000392	ITFG3	76.4619	0.779516	0.27388	-2.8453	0.00443695	0.0161147
PMO000393	CPSF4	104.999	-0.81903	0.322704	2.53875	0.0111249	0.0341596
PMO000395	BRAT1	79.6991	-1.14449	0.354022	3.23226	0.00122816	0.00553122
PMO000396	KDM8	25.546	0.898726	0.30171	-2.97438	0.00293579	0.0114773
PMO000408	PMM2	40.4635	-0.969692	0.323757	2.99674	0.0027288	0.0108295
PMO000410	K0556	7.51714	1.38544	0.405425	-3.38585	0.000709593	0.00348288
PMO000414	WIPF3	11.9008	-5.06486	0.547041	8.21129	2.18834e-16	1.06266e-14
PMO000417	TSN31	2.85212	1.429	0.554685	-2.51886	0.0117734	0.0357636
PMO000419	MYRIP	6.54299	1.54238	0.4474	-3.39468	0.000687091	0.00338988
PMO000426	FYCO1	1603.85	1.24091	0.403622	-3.07548	0.00210163	0.00870273
PMO000428	CDV3	48.0144	4.37002	0.426961	-9.84317	7.33611e-23	5.82943e-21
PMO000432	METL6	44.3622	-1.9339	0.327318	5.90401	3.54776e-09	6.85757e-08
PMO000453	NF2L3	19.2032	2.78937	0.425698	-6.42356	1.33127e-10	3.07571e-09
PMO000457	QNR71	36.9805	4.35954	0.525217	-7.88246	3.20996e-15	1.39706e-13
PMO000459	MDR1	3.94191	2.00488	0.656034	-2.9619	0.00305746	0.0118703
PMO000463	ADSV	4.84453	-1.30267	0.454864	2.85524	0.00430045	0.0157388
PMO000469	MIO	131.956	-0.808189	0.195035	4.14418	3.41034e-05	0.000262059
PMO000476	CLD12	26.8099	1.75783	0.347951	-5.02624	5.00198e-07	6.12918e-06
PMO000478	RUN3B	23.8199	-1.04554	0.280645	3.72635	0.000194272	0.00116842
PMO000483	HACD1	14.7885	-1.03427	0.353968	2.92154	0.00348311	0.0132515
PMO000496	ZMY11	68.1415	0.93759	0.331882	-2.82369	0.00474741	0.0169672
PMO000508	CUBN	16.1649	1.07045	0.437064	-2.442	0.014606	0.0426037
PMO000509	OCTC	58.6784	-1.33274	0.315767	4.22117	2.43033e-05	0.000192827
PMO000513	AHR	13.3148	1.68511	0.473856	-3.5231	0.00042653	0.00226755
PMO000517	FZD1	32.5185	0.956647	0.388653	-2.45686	0.0140159	0.0412378
PMO000520	NR1D2	42.8221	1.17325	0.488638	-2.39874	0.0164515	0.0469807
PMO000522	SNX10	34.1346	-1.32315	0.375546	3.52264	0.000427274	0.00227035
PMO000524	EIF1B	14.4235	1.63588	0.361741	-4.48812	7.18543e-06	6.48636e-05
PMO000526	ACKR4	35.8511	5.18632	0.504291	-8.98086	2.68658e-19	1.58312e-17
PMO000528	ANO10	49.4888	-0.761511	0.311827	2.44292	0.0145689	0.0425423
PMO000531	RSU1	36.4695	0.803401	0.243146	-3.30331	0.000955493	0.00447818
PMO000535	EPC1	68.7796	0.833985	0.269685	-3.0912	0.00199351	0.00832071
PMO000549	GBG11	2.43565	-2.95387	0.683967	4.32086	1.55424e-05	0.00012959
PMO000553	BGAL	19.7432	-0.930959	0.273608	3.40371	0.000664777	0.00329218
PMO000555	SDHF3	1.71343	-1.80596	0.601072	2.94297	0.00325077	0.012499
PMO000559	MPP6	2.41694	2.45056	0.622442	-3.77187	0.000162027	0.000999491
PMO000567	GLT15	65.0421	-1.49465	0.466537	3.19871	0.00138044	0.00612236
PMO000568	RBMS3	3.80493	1.69483	0.58011	-2.84226	0.00447951	0.0162243
PMO000569	AT2C1	124.494	1.07259	0.259692	-4.12854	3.65068e-05	0.000277478
PMO000572	SKDA1	5.04826	2.10143	0.578234	-3.51034	0.000447535	0.00236008
PMO000580	ZN438	23.5155	0.999092	0.295203	-3.37988	0.000725164	0.00355369
PMO000584	WDR60	11.1002	1.0948	0.442029	-2.47564	0.0132996	0.0395295
PMO000587	AKIB1	118.585	1.54072	0.443915	-3.46902	0.000522357	0.00268184
PMO000591	RUSD3	175.824	-0.865068	0.285914	3.02525	0.00248427	0.0100531
PMO000594	MIME	8.42008	2.14262	0.573073	-3.67887	0.000234266	0.00137198
PMO000595	OMD	8.17895	1.56201	0.541085	-2.85322	0.00432784	0.015817
PMO000596	BTG1	3.92588	-2.41829	0.561071	4.21514	2.49622e-05	0.00019716
PMO000598	UBA1	14.1377	-1.70447	0.415041	4.09774	4.17201e-05	0.000311904
PMO000600	ACPH	15.5428	2.09024	0.389956	-5.2994	1.16186e-07	1.65357e-06
PMO000601	BSN	73.3662	-2.85377	0.276296	10.3135	6.12549e-25	6.06135e-23
PMO000609	SMIM4	1.29002	1.96961	0.700956	-2.77757	0.00547666	0.0191291
PMO000621	EMC3	211.879	-0.626943	0.233806	2.68178	0.00732317	0.024254
PMO000623	ARP8	81.6381	-1.01853	0.186206	5.46996	4.50125e-08	7.12121e-07
PMO000624	SELK	45.2597	-1.92367	0.363925	5.28244	1.27475e-07	1.78827e-06
PMO000626	WNT5A	22.0602	1.6675	0.451071	-3.6755	0.000237381	0.00138473
PMO000633	RAB7A	346.578	-1.05924	0.280691	3.77371	0.000160837	0.00099353
PMO000635	S61A1	28.2914	0.778677	0.26527	-2.9313	0.00337544	0.0128933
PMO000636	KBTBC	12.134	2.4895	0.701917	-3.57548	0.000349581	0.00191776
PMO000639	MCM2	7.28044	1.31798	0.519508	-2.51767	0.0118134	0.0358539
PMO000640	S41A1	77.7371	-1.32646	0.329567	4.02475	5.70349e-05	0.000406413
PMO000644	XPC	168.902	1.33409	0.204728	-6.51454	7.29146e-11	1.77037e-09
PMO000645	GRIP2	2.23852	2.34204	0.725977	-3.29161	0.000996164	0.00463977
PMO000648		73.0815	-0.80413	0.288817	2.78353	0.00537701	0.0188501
PMO000649	NDUF3	28.3349	-4.09759	0.416251	9.65932	4.48819e-22	3.24666e-20
PMO000655	THOC7	65.6697	0.962724	0.331413	-2.90606	0.00366015	0.0137554
PMO000656	PSMD6	916.877	-1.78798	0.355568	5.02721	4.97659e-07	6.10519e-06
PMO000664	UBA3	187.373	-0.835212	0.249545	3.34709	0.000816659	0.00392213
PMO000668	PZRN3	203.938	2.20805	0.456122	-4.84414	1.27162e-06	1.39811e-05
PMO000669	PZRN3	42.6141	2.27966	0.507988	-4.46891	7.86197e-06	7.01823e-05
PMO000673	RAD18	67.3349	-1.26897	0.276053	4.59742	4.27762e-06	4.12055e-05
PMO000674	SEC13	162.814	-0.707337	0.250984	2.81837	0.00482681	0.0171913
PMO000676	PLXD1	93.2881	1.10307	0.352976	-3.12279	0.00179143	0.00763212
PMO000677	RT25	225.578	-0.837826	0.236652	3.54043	0.000399477	0.00214219
PMO000679	FGD5	138.954	1.38269	0.390145	-3.54215	0.000396878	0.00213152
PMO000681	SHSA5	12.4502	1.67367	0.402966	-4.1241	3.72182e-05	0.000281864
PMO000685	OASL2	43.1644	-2.7891	0.443668	6.26467	3.73614e-10	8.1984e-09
PMO000688	H1X	103.288	-1.63102	0.328395	4.96613	6.83008e-07	8.06764e-06
PMO000691	P4HTM	68.9449	-1.88371	0.241059	7.8123	5.6155e-15	2.40412e-13
PMO000692	ARI2	259.566	-0.904461	0.270049	3.34936	0.000809978	0.00389897
PMO000693	ACOX2	398.772	1.75004	0.386301	-4.53146	5.8578e-06	5.42778e-05
PMO000699	ARHG3	24.6024	1.13449	0.36362	-3.1155	0.00183632	0.00778858
PMO000701	KPCD	33.6119	-1.21429	0.452632	2.68179	0.00732294	0.024254
PMO000707	LMOD3	157.639	1.2859	0.509328	-2.52791	0.0114743	0.0350071
PMO000711	DUS7	29.8947	0.781542	0.262126	-2.97769	0.00290427	0.011371
PMO000712	TASOR	33.2143	1.0017	0.319201	-3.13366	0.0017264	0.00738507
PMO000714	NICN1	6.42923	1.99007	0.553175	-3.54895	0.000386764	0.00208843
PMO000716	DOCK3	8.54561	-2.0477	0.625918	3.23862	0.0012011	0.00542797
PMO000719	PARP3	40.8924	-1.07534	0.373661	2.87935	0.00398497	0.0147489
PMO000720	EOGT	25.7153	1.30544	0.367885	-3.53739	0.000404097	0.00216364
PMO000724	BAP1	108.712	1.05621	0.216954	-4.8664	1.1365e-06	1.27358e-05
PMO000729	FRM4B	26.4846	1.61057	0.484491	-3.31615	0.000912658	0.00430628
PMO000739	MAPK3	32.4706	-1.46563	0.487467	3.00802	0.00262958	0.0105394
PMO000743	CD276	2.77477	-1.49997	0.598872	2.47666	0.0132618	0.0394568
PMO000744	BBS4	17.6343	0.936138	0.309383	-3.02079	0.00252119	0.0101632
PMO000745	PARP6	46.5919	-1.71226	0.31544	5.42698	5.73169e-08	8.91983e-07
PMO000748	B2MG	582.762	-1.21371	0.393616	3.08248	0.00205286	0.00853109
PMO000750	SC11A	34.4844	1.70028	0.359423	-4.72523	2.29849e-06	2.39651e-05
PMO000752	LACTB	6442.68	7.14535	0.392894	-18.1799	7.44413e-74	1.11545e-70
PMO000756	KLF13	32.8555	1.8455	0.381905	-4.82055	1.43165e-06	1.55935e-05
PMO000759	ZO1	422.096	1.51331	0.35783	-4.22885	2.3489e-05	0.000187358
PMO000761	CCNB2	68.4037	-0.846488	0.235505	3.5944	0.000325145	0.00180638
PMO000762	HTF4	338.277	1.40733	0.382183	-3.68248	0.000230974	0.00135497
PMO000764	MK06	1570.68	0.887023	0.354	-2.50607	0.0122081	0.0368281
PMO000768	MYEF2	45.1919	1.13155	0.241673	-4.67831	2.89243e-06	2.9455e-05
PMO000770	CSN2	415.612	-1.93773	0.33448	5.7922	6.94709e-09	1.28924e-07
PMO000771	ZNT4	57.9839	1.37131	0.227153	-6.03018	1.63777e-09	3.32919e-08
PMO000780	ZFAN6	52.0024	-4.53971	0.362176	12.3331	6.00577e-35	1.14536e-32
PMO000781	K1024	3.8669	1.93438	0.578635	-3.20543	0.00134862	0.005999
PMO000782	TICRR	21.6653	-1.37516	0.334642	4.10744	4.00066e-05	0.000300164
PMO000784	RT11	302.589	-7.02005	0.345281	19.8041	2.7431e-87	5.75448e-84
PMO000786	F174B	3.45998	3.64127	0.631011	-5.66897	1.43662e-08	2.48249e-07
PMO000787	CRNL1	42.7546	1.4644	0.407773	-3.5926	0.000327391	0.00181597
PMO000789	IGF1R	105.112	-1.00018	0.254386	3.93127	8.44996e-05	0.000570345
PMO000795	PCSK6	18.4796	1.3488	0.448822	-2.98897	0.0027992	0.0110545
PMO000796	SPG21	31.6272	-5.91089	0.474984	10.9381	7.57952e-28	9.67959e-26
PMO000797	KBTBD	60.8053	2.25588	0.38648	-5.8228	5.78703e-09	1.08393e-07
PMO000804	DPP8	98.4228	0.806395	0.270515	-2.97969	0.00288539	0.0113055
PMO000806	TIPIN	10.7403	-1.27109	0.33366	3.80839	0.000139874	0.000879053
PMO000808	RL4	2817.09	-0.662713	0.238742	2.77581	0.00550637	0.0192137
PMO000809	AAGAB	14.4142	-2.06686	0.317338	6.49131	8.50904e-11	2.04705e-09
PMO000810	CALL4	3.68536	-2.5204	0.600619	4.07838	4.53506e-05	0.000334223
PMO000814	MO4L1	72.1558	-0.880804	0.212018	4.15484	3.25508e-05	0.000251233
PMO000818	BLM	63.1744	-1.73545	0.328376	5.28236	1.27527e-07	1.78827e-06
PMO000823	IDHP	544.708	-0.942959	0.29825	3.16145	0.00156985	0.00680433
PMO000824	CIB1	9.11365	2.53135	0.453823	-5.41787	6.03132e-08	9.3246e-07
PMO000829	FKBP8	3.4673	-1.4781	0.502513	2.91629	0.00354219	0.0134227
PMO000830	PDIA3	312.062	-0.678338	0.275907	2.45874	0.0139427	0.0410628
PMO000834	LIPC	4.47892	1.85987	0.546361	-3.31802	0.000906576	0.00428144
PMO000835	MYZAP	10.9276	0.922408	0.361631	-2.54154	0.0110364	0.0339485
PMO000836	CGNL1	49.1235	1.55298	0.344279	-4.50185	6.73636e-06	6.12285e-05
PMO000838	PAR16	156.549	-1.38752	0.355886	3.89878	9.66799e-05	0.000638185
PMO000851	FSD2	296.189	-1.01683	0.41733	2.43603	0.0148494	0.0431934
PMO000852	HDGR3	6.59715	1.58272	0.502228	-3.12424	0.00178263	0.00760699
PMO000855	GCP4	55.0028	-0.920431	0.283037	3.25267	0.00114328	0.00520931
PMO000856	SCG3	6.00736	1.33093	0.53132	-2.49708	0.0125222	0.0376074
PMO000864	SENP8	38.3585	-1.20815	0.299355	4.03652	5.42503e-05	0.000389747
PMO000869	CLN6	117.686	-2.43645	0.322226	7.55825	4.08522e-14	1.59293e-12
PMO000870	TMOD3	14.3951	1.1341	0.378042	-2.98874	0.00280127	0.0110562
PMO000880	RN111	91.3627	0.929536	0.329477	-2.81921	0.00481413	0.0171578
PMO000882	AP3S2	67.3555	1.25224	0.339372	-3.68955	0.000224655	0.00132308
PMO000883	KCRU	6.97258	-1.47148	0.452801	3.24676	0.00116726	0.00530244
PMO000901	SYRC	87.7247	2.17669	0.390516	-5.57347	2.4971e-08	4.15747e-07
PMO000907	S22A5	28.3106	-1.2301	0.32453	3.78864	0.000151476	0.000940134
PMO000911	KCT2	99.1076	0.910522	0.309865	-2.93825	0.00330067	0.0126662
PMO000912	VDAC1	158.148	-0.870057	0.310682	2.8006	0.00510069	0.0180407
PMO000913	SKP1	159.072	-2.18696	0.340697	6.41582	1.40067e-10	3.22894e-09
PMO000923	FA13B	293.176	1.53596	0.325498	-4.71809	2.38075e-06	2.47735e-05
PMO000926	TBC9B	215.233	-1.28029	0.181058	7.07114	1.53665e-12	4.92904e-11
PMO000936	CCD69	16.3759	3.94696	0.575219	-6.30166	2.94483e-10	6.51652e-09
PMO000937	FAT2	1.67143	2.64433	0.678315	-3.89071	9.99506e-05	0.000656653
PMO000940	HAVR1	1.07018	1.89888	0.717483	-2.66583	0.00767989	0.0252997
PMO000941	MED7	14.3327	-0.846514	0.356705	2.37491	0.0175532	0.0494802
PMO000947	RN145	90.4133	0.851573	0.274775	-3.09836	0.00194597	0.00816126
PMO000949	IOV7	17.6	1.70316	0.600906	-2.84923	0.00438257	0.0159669
PMO000950	THOC3	45.5776	0.800032	0.318695	-2.51018	0.012067	0.0364969
PMO000952	NOP16	199.769	-1.12237	0.281414	3.9882	6.65762e-05	0.000466166
PMO000954	RAB24	69.4765	-2.85456	0.400495	7.12198	1.0639e-12	3.47638e-11
PMO000965	CRERF	225.97	1.9101	0.428962	-4.45221	8.49894e-06	7.51647e-05
PMO000970	S3TC2	2.65208	2.65518	0.66675	-3.83421	0.000125968	0.000806151
PMO000975	C1QT2	4.56901	1.33323	0.553878	-2.37779	0.0174166	0.0491213
PMO000981	GNPI1	7.69332	-0.955112	0.39424	2.42319	0.0153848	0.0444255
PMO000983		14.5498	1.80004	0.57612	-3.10983	0.00187198	0.00791102
PMO000986	FXDC2	34.1347	-1.80541	0.359458	5.02082	5.14519e-07	6.28997e-06
PMO000990	RGF1C	118.075	6.13856	0.450726	-12.4528	1.35078e-35	2.72468e-33
PMO000991	CPEB4	87.7497	1.95791	0.339715	-5.75294	8.77048e-09	1.58047e-07
PMO000993	ADRA2	11.5852	2.865	0.599064	-4.63679	3.53869e-06	3.50163e-05
PMO000997	RS14	947.574	2.17391	0.284609	-7.63815	2.20372e-14	8.92464e-13
PMO001000	CCNG1	89.4644	-0.977203	0.274594	3.55939	0.000371722	0.0020223
PMO001003	KC1A	514.119	-0.97064	0.376484	2.57791	0.00993995	0.0311588
PMO001022	STK10	110.109	1.89244	0.410078	-4.60862	4.05355e-06	3.95146e-05
PMO001023	HMMR	3.00134	1.64141	0.626333	-2.56526	0.0103097	0.0321077
PMO001024	SPRC	187.231	1.63176	0.410184	-3.97814	6.94568e-05	0.000481834
PMO001032	VGFR3	71.6776	1.15618	0.464476	-2.48663	0.0128958	0.0385368
PMO001040	DOCK2	3.32731	1.81505	0.556313	-3.14263	0.00167437	0.00719184
PMO001057	TNR6	5.78091	2.51553	0.495437	-4.81784	1.4512e-06	1.57901e-05
PMO001059	RPP30	26.9528	-0.690281	0.220693	3.1287	0.00175582	0.00750173
PMO001060	HECD2	9.8531	3.21938	0.521479	-5.78528	7.23914e-09	1.33213e-07
PMO001061	TNKS2	70.5264	1.39794	0.298899	-4.67014	3.00992e-06	3.05034e-05
PMO001063	NOC3L	158.771	1.37209	0.231244	-5.93245	2.98444e-09	5.89925e-08
PMO001079	MORN4	19.4052	-1.00909	0.33645	2.9976	0.00272117	0.0108033
PMO001082	RHG19	4.48349	1.98141	0.60609	-3.16903	0.00152948	0.00666781
PMO001086	DPOLL	78.6424	-1.32353	0.344635	3.83886	0.000123605	0.000793932
PMO001088	PDZD7	6.77165	-2.0104	0.491142	4.07826	4.53745e-05	0.000334223
PMO001090	TM180	38.5496	-1.73818	0.371372	4.67888	2.88447e-06	2.94025e-05
PMO001091	SUFU	46.5498	-0.761573	0.267218	2.85068	0.00436254	0.0159105
PMO001105	SMC3	90.0048	1.22109	0.354542	-3.44243	0.000576508	0.00292125
PMO001109	SHOC2	61.1017	-0.793501	0.264022	3.00537	0.00265262	0.0106034
PMO001112	CASP7	9.51479	2.08643	0.386518	-5.30049	1.1549e-07	1.64589e-06
PMO001116	F16B1	428.695	-0.933698	0.253195	3.68745	0.000226509	0.0013325
PMO001121	NANO1	11.7443	4.37997	0.652159	-6.42966	1.2789e-10	2.97762e-09
PMO001125	SAC2	45.0567	1.35036	0.341738	-3.94707	7.91126e-05	0.000537792
PMO001135	MK08	31.512	-0.870092	0.229412	3.79334	0.000148636	0.000927548
PMO001141	SLK	154.08	1.00973	0.390354	-2.58648	0.00969631	0.0305328
PMO001158	MYOF	44.7786	1.11402	0.451306	-2.46547	0.0136835	0.0404984
PMO001162	MFRN2	108.236	1.23937	0.258443	-4.79351	1.6389e-06	1.76312e-05
PMO001164	ATRN1	16.2019	1.83623	0.423754	-4.29354	1.75845e-05	0.000143536
PMO001166	NOLC1	152.555	1.57722	0.338804	-4.65371	3.26011e-06	3.26291e-05
PMO001168	KI20B	17.0155	-1.29232	0.436464	2.95817	0.0030947	0.0119957
PMO001169	HPSE2	2.72694	1.50358	0.60419	-2.44149	0.014627	0.0426419
PMO001172	LOXL4	2.56103	2.21881	0.614276	-3.4958	0.000472647	0.00246647
PMO001180	NFKB2	130.449	-0.881917	0.284409	3.10089	0.00192941	0.0081033
PMO001181	LDB1	61.1071	1.08915	0.301408	-3.61021	0.000305944	0.00171699
PMO001184	IDE	257.309	1.04333	0.429259	-2.43097	0.0150584	0.0437286
PMO001196	RM40	81.1001	-0.850121	0.341874	2.48734	0.0128703	0.0385045
PMO001200	TBX1	3.62802	1.8307	0.650352	-2.71973	0.00653351	0.0221279
PMO001201	COMT	55.442	0.731552	0.287278	-2.5466	0.0108779	0.0335286
PMO001208	KREM1	32.5421	1.23207	0.460953	-2.66699	0.00765338	0.0252283
PMO001213	PIPNB	34.9555	0.901685	0.282497	-3.19067	0.00141943	0.00627142
PMO001215	TFP11	166.876	-0.789592	0.278605	2.8341	0.00459544	0.0165413
PMO001229	SESQ1	8.82377	2.21538	0.573839	-3.77499	0.000160014	0.000989616
PMO001232	PPTC7	163	1.31189	0.367628	-3.56713	0.000360908	0.00197062
PMO001234	RSRC2	186.254	0.76794	0.23488	-3.26961	0.00107696	0.00495667
PMO001243	AT2A2	159.97	1.92972	0.449881	-4.29089	1.77958e-05	0.000145148
PMO001244	OGFD2	38.6949	0.860526	0.310547	-2.77096	0.00558905	0.0194504
PMO001245	AR6P4	49.0409	-1.31185	0.38919	3.37231	0.000745408	0.00363469
PMO001246	SETD8	71.9102	1.17766	0.339045	-3.47354	0.000513636	0.00264095
PMO001248	TMED2	53.728	-0.879552	0.2263	3.88783	0.000101143	0.000662639
PMO001249	DDX55	48.1187	-1.46613	0.30043	4.87935	1.06436e-06	1.19915e-05
PMO001250	TF2H3	6.45665	-1.69172	0.430808	3.91698	8.96652e-05	0.000597901
PMO001251	TECT2	9.08691	2.85169	0.511041	-5.34058	9.265e-08	1.34973e-06
PMO001255	AACS	39.5525	1.95102	0.326422	-5.9574	2.56286e-09	5.13013e-08
PMO001259	AGRD1	303.854	-7.06558	0.384659	17.863	2.28943e-71	3.00173e-68
PMO001274	TRPV4	28.038	1.36155	0.495942	-2.74083	0.00612836	0.0209929
PMO001282	TNG2	99.7474	0.978132	0.268547	-3.6416	0.000270953	0.00155173
PMO001285	HIP1R	74.8295	1.06605	0.42052	-2.53393	0.011279	0.0345597
PMO001286	DENR	9.49961	-2.45819	0.522219	4.67252	2.97528e-06	3.02108e-05
PMO001287	KDM2B	51.5184	1.02417	0.260982	-3.92119	8.81114e-05	0.000589413
PMO001288	LV1	31.9833	1.55518	0.551305	-2.82575	0.00471699	0.0168862
PMO001289	VPP2	154.112	-0.801301	0.263297	3.04377	0.00233636	0.00951693
PMO001293	PI4KA	158.921	0.904292	0.176999	-5.10795	3.25678e-07	4.17608e-06
PMO001296	TBL1R	26.5156	1.462	0.342658	-4.25364	2.10324e-05	0.000169569
PMO001306	CC033	16.8777	1.87308	0.443904	-4.19572	2.72007e-05	0.000213554
PMO001307	CCNL1	113.752	-1.22011	0.27853	4.38044	1.18438e-05	0.000101164
PMO001315	CHLE	2.09279	-1.5659	0.588421	2.63676	0.00837015	0.0271138
PMO001317	GOLI4	25.0766	0.9404	0.350027	-2.68257	0.00730592	0.0242199
PMO001323	TNIK	305.717	1.51526	0.367649	-4.12133	3.76684e-05	0.000285067
PMO001328	PEX5R	6.74582	-1.86569	0.416648	4.45149	8.5277e-06	7.53556e-05
PMO001334	PSMD2	2513.73	-1.72222	0.326467	5.27439	1.33196e-07	1.85784e-06
PMO001336	PHF13	30.5965	-1.36624	0.373552	3.65595	0.000256227	0.00147912
PMO001339	ACHG	93.3613	-1.08737	0.406344	2.67597	0.00745136	0.0246236
PMO001340	ACHD	57.3956	-1.05159	0.296805	3.54405	0.000394024	0.00212053
PMO001343	PPBI1	0.963385	1.90236	0.71718	-2.65113	0.00802219	0.0261846
PMO001344	DI3L2	54.3174	-0.74568	0.259159	2.87793	0.0040029	0.01481
PMO001345	PSMD1	1459.1	-0.841686	0.338492	2.48636	0.0129058	0.0385448
PMO001347	TFR1	372.218	2.83773	0.480285	-5.91437	3.33158e-09	6.49534e-08
PMO001352	BCL6	127.25	3.25571	0.334541	-7.05981	1.6673e-12	5.28348e-11
PMO001353	P3H2	10.12	-2.11436	0.370174	5.67853	1.35856e-08	2.36711e-07
PMO001369	IFT80	15.8491	-1.22812	0.435835	2.81202	0.00492319	0.0174989
PMO001372	SSRG	115.479	-0.992446	0.294519	3.36998	0.000751728	0.00366057
PMO001374	PLCH1	8.10377	2.24239	0.622172	-3.53085	0.000414227	0.00221336
PMO001375	RM47	127.618	-1.55282	0.269912	5.75267	8.78458e-09	1.58047e-07
PMO001377	PROF2	107.17	-0.908297	0.374545	2.42544	0.0152899	0.0442294
PMO001383	COMD2	54.9054	-1.11635	0.242566	4.60268	4.17094e-06	4.04335e-05
PMO001390	UIF	76.1929	0.678105	0.20624	-3.28756	0.00101059	0.00469032
PMO001403	AP2M1	572.39	-0.788644	0.231523	3.40641	0.000658233	0.00326904
PMO001407	GIPC2	26.4214	-1.57501	0.486344	3.23642	0.00121039	0.00546054
PMO001409	FA73A	45.7261	1.10465	0.415035	-2.65793	0.00786229	0.025755
PMO001417	SLIK3	12.5766	1.3937	0.47166	-2.94789	0.00319949	0.0123608
PMO001428	MKNK1	195.592	1.5923	0.428821	-3.71469	0.00020345	0.00121595
PMO001435	TUT4	211.193	0.754403	0.238582	-3.16145	0.00156988	0.00680433
PMO001438	CA123	47.1494	-4.48683	0.336872	13.095	3.51494e-39	1.02412e-36
PMO001439	NDC1	40.3436	2.93893	0.320547	-9.08394	1.0471e-19	6.34858e-18
PMO001443	SSBP3	3.94053	3.10313	0.666911	-4.62819	3.6888e-06	3.62622e-05
PMO001445	DHC24	13.9276	-1.73431	0.392977	4.40419	1.06182e-05	9.18932e-05
PMO001449	MYSM1	41.1758	0.869344	0.262155	-3.31311	0.000922651	0.00434562
PMO001463	RPE65	15.7014	1.4307	0.381352	-3.73696	0.000186262	0.0011275
PMO001478	TTC4	21.4347	-0.800448	0.331702	2.41541	0.0157176	0.0452866
PMO001485	NRDC	1318.46	-1.0226	0.282643	3.61786	0.000297048	0.00167423
PMO001486	ECHD2	192.703	-0.852097	0.283963	3.00097	0.00269118	0.0107114
PMO001492	TAL1	159.293	4.10892	0.410791	-9.92737	3.16484e-23	2.65568e-21
PMO001494	DPH2	35.8693	-1.31017	0.303962	4.3081	1.64665e-05	0.000135653
PMO001502	P85A	26.1576	1.37911	0.447002	-3.08157	0.00205914	0.00855042
PMO001506	EI2BG	189.783	-1.19337	0.225382	5.29515	1.18917e-07	1.68557e-06
PMO001510	MTMR6	39.1223	1.42751	0.375607	-3.79099	0.000150046	0.000932917
PMO001512	N42L2	115.573	-0.618725	0.24365	2.53978	0.0110922	0.0340989
PMO001517	UBP12	16.7274	-2.09148	0.430911	4.84004	1.29813e-06	1.4203e-05
PMO001520	AT8A2	16.9774	5.57405	0.582454	-9.00312	2.19388e-19	1.31495e-17
PMO001521	AMER2	1.08233	1.90908	0.685963	-2.77728	0.0054816	0.01914
PMO001524	SACS	5.59187	-2.18037	0.624772	3.44513	0.000570779	0.00289642
PMO001525	LATS2	204.917	1.1718	0.451787	-2.5939	0.00948944	0.0300256
PMO001539	C19L2	10.0017	-4.18725	0.518456	7.51806	5.55971e-14	2.14396e-12
PMO001543	PORIM	4.24771	1.87712	0.535393	-3.40519	0.000661181	0.00328057
PMO001545	MAML2	4.41776	1.17678	0.482362	-2.40598	0.0161293	0.0461988
PMO001546	MTMR2	28.543	1.58496	0.348659	-4.53339	5.80439e-06	5.38305e-05
PMO001549	MRE11	12.1068	1.31095	0.376934	-3.46621	0.00052785	0.00270342
PMO001555	CHRD1	45.9729	2.21224	0.36352	-6.06498	1.31966e-09	2.72479e-08
PMO001560	MAON	179.654	3.54903	0.52519	-6.77967	1.20453e-11	3.3602e-10
PMO001561	DDIAS	185.985	0.842125	0.329325	-2.55715	0.0105535	0.0327012
PMO001562	PCF11	569.491	0.926198	0.302815	-3.05855	0.00222409	0.00912696
PMO001566	CCD83	2.66114	-3.27044	0.666446	4.81524	1.47025e-06	1.59477e-05
PMO001567	EED	8.13476	2.06156	0.433802	-4.66622	3.06795e-06	3.10316e-05
PMO001577	GAB2	26.0297	1.17733	0.409388	-2.8668	0.00414641	0.0152442
PMO001581	CCD82	8.14122	2.0555	0.497233	-4.0497	5.12827e-05	0.000370968
PMO001584	KDEL2	21.3278	2.59618	0.506895	-5.04356	4.5694e-07	5.65757e-06
PMO001590	PSPC1	39.8161	-1.25894	0.339657	3.70698	0.000209746	0.00124956
PMO001597	SKA3	4.91566	3.13507	0.590786	-4.96068	7.02453e-07	8.27869e-06
PMO001601	DCNL5	48.6559	-1.44755	0.339954	4.25604	2.08077e-05	0.000168145
PMO001619	FKB15	106.712	1.37791	0.357664	-3.84903	0.000118587	0.000764981
PMO001620	RL12	538.167	-0.990079	0.287817	3.43987	0.000581994	0.00294195
PMO001624	NSMF	5.17431	1.83512	0.55691	-3.23555	0.00121409	0.00547253
PMO001625	ANC2	141.417	1.65355	0.327114	-5.05266	4.35691e-07	5.43396e-06
PMO001626	TO4AA	39.7825	-1.51496	0.37674	4.01866	5.85294e-05	0.000416214
PMO001627	DDR2	70.4117	1.24039	0.407199	-3.04297	0.00234253	0.00953467
PMO001640	DPM2	1.50413	1.91942	0.714854	-2.74431	0.00606374	0.0208192
PMO001641	SIA7D	15.5759	-1.84002	0.376229	4.88993	1.00872e-06	1.14259e-05
PMO001651	SPTN1	901.868	1.30464	0.25349	-5.14664	2.652e-07	3.4771e-06
PMO001657	FA73B	10.9857	1.12414	0.440426	-2.53264	0.0113206	0.0346389
PMO001668	PPAC3	46.3517	1.60567	0.535326	-2.99807	0.00271696	0.0107948
PMO001676	GFI1B	13.6547	1.64415	0.498851	-3.28196	0.00103089	0.00477396
PMO001684	DPP2	162.138	-2.02856	0.299745	6.76589	1.32489e-11	3.6764e-10
PMO001685	UBP20	127.155	0.689767	0.264517	-2.60674	0.00914086	0.0290844
PMO001692	SAPC2	3.64118	2.95328	0.636792	-4.48811	7.18576e-06	6.48636e-05
PMO001693	NELFB	77.5693	-1.35101	0.362083	3.73136	0.000190451	0.00114741
PMO001695	POMT1	27.8509	-0.85086	0.27639	3.07935	0.00207455	0.00860758
PMO001702	TOR1B	34.4952	1.3005	0.282989	-4.59034	4.42514e-06	4.24272e-05
PMO001709	IDD	86.7078	0.846415	0.256311	-3.30044	0.000965334	0.00451422
PMO001715	YDJC	39.8082	-1.51003	0.432773	3.48773	0.000487141	0.00252952
PMO001716	UFD1	443.772	-1.41134	0.230186	6.13129	8.71704e-10	1.82866e-08
PMO001720	GOGA3	105.034	0.990718	0.353569	-2.80056	0.00510142	0.0180407
PMO001721	AUTS2	206.174	-2.10777	0.313595	6.71933	1.82562e-11	4.86013e-10
PMO001723	CC117	74.4486	0.975515	0.315678	-3.08797	0.00201532	0.00840503
PMO001732	F222A	2.24474	-1.77479	0.566006	3.08736	0.00201946	0.0084156
PMO001734	UBP30	21.8793	-1.6838	0.333343	5.04337	4.57395e-07	5.65757e-06
PMO001739	PTN11	419.653	-1.28031	0.302991	4.22549	2.38425e-05	0.000189889
PMO001744	WDR66	74.5052	-4.17537	0.410176	10.0971	5.69064e-24	5.01589e-22
PMO001747	P2RX4	13.0758	0.907418	0.364435	-2.4871	0.0128788	0.038519
PMO001748	APC7	63.937	-0.798395	0.23272	3.43113	0.00060107	0.0030267
PMO001750	GPN3	81.2596	0.616902	0.238843	-2.58288	0.00979805	0.0308104
PMO001753	GIN1	98.5281	0.705236	0.214136	-3.29325	0.000990364	0.00461891
PMO001755	SCRB1	216.749	-0.931055	0.359232	2.59188	0.0095454	0.0301753
PMO001760	CDKA1	4.5656	-1.56112	0.510672	3.0575	0.00223189	0.00914463
PMO001761	MPP9	27.729	1.35652	0.414999	-3.26045	0.00111235	0.0050883
PMO001762	KNTC1	11.1063	2.8012	0.505514	-5.36161	8.24822e-08	1.2134e-06
PMO001772	HEP2	13.9539	1.27541	0.494695	-2.56446	0.0103337	0.032149
PMO001775	RIPL2	20.725	1.4798	0.42225	-3.49335	0.000477007	0.00248561
PMO001777	STX2	87.193	1.96642	0.302767	-6.48492	8.87781e-11	2.11635e-09
PMO001778	CHFR	31.7667	0.955499	0.329071	-2.89952	0.00373733	0.0139803
PMO001781	NCOR2	571.17	-0.739529	0.288419	2.564	0.0103472	0.0321768
PMO001782	EI2BA	64.6991	-0.96897	0.337024	2.87514	0.00403843	0.0149204
PMO001783	PITM2	261.827	1.95743	0.399837	-4.89455	9.85299e-07	1.1197e-05
PMO001784	RNF34	75.229	0.669438	0.255837	-2.61606	0.00889518	0.028463
PMO001787	SH2B3	182.438	1.74326	0.542903	-3.21642	0.00129801	0.00579602
PMO001788	ACACB	5309.39	-0.596508	0.228425	2.61135	0.00901845	0.0287784
PMO001789	SRR1L	20.9378	-1.26338	0.392051	3.2208	0.00127835	0.00572283
PMO001792	ARBK2	62.2689	0.955709	0.249306	-3.83115	0.000127548	0.000813282
PMO001797	UBE3B	125.469	0.821049	0.274244	-2.99258	0.00276629	0.0109493
PMO001799	PPIL2	54.3121	0.741289	0.279622	-2.65145	0.00801461	0.0261723
PMO001801	RIMB2	12.3915	-2.45599	0.398164	6.12556	9.03678e-10	1.89195e-08
PMO001807	SET1B	61.6694	0.82031	0.316301	-2.59092	0.00957184	0.0302407
PMO001819	DCAM	108.049	0.878975	0.3213	-2.73485	0.00624094	0.0213021
PMO001829	P20D2	361.125	-1.4713	0.322049	4.56759	4.93355e-06	4.6536e-05
PMO001841	CD109	7.66492	1.92229	0.496876	-3.78592	0.00015314	0.000949339
PMO001849	BAG2	69.5736	-1.18982	0.458152	2.59605	0.00943031	0.0298565
PMO001854	MLIP	64.7691	1.93635	0.533912	-3.63611	0.000276783	0.00157524
PMO001859	F135A	201.98	0.914159	0.20809	-4.39225	1.12182e-05	9.63697e-05
PMO001873	MOT10	59.8182	-1.07737	0.397028	2.71282	0.00667131	0.0224929
PMO001874	FIG4	17.7647	-1.31987	0.346724	3.80377	0.000142508	0.000892398
PMO001883	ELOA1	3.57485	2.65005	0.657699	-3.9141	9.07409e-05	0.000603922
PMO001887	ODBB	499.482	-0.944727	0.360104	2.62319	0.00871119	0.0279938
PMO001891	ARMC2	2.63224	2.24859	0.623049	-3.47479	0.000511263	0.00263261
PMO001893	CE57L	15.7342	3.48933	0.710833	-5.02971	4.91213e-07	6.04025e-06
PMO001896	ANKR6	15.5202	-1.31196	0.409458	3.19813	0.00138324	0.00613221
PMO001907	GAS1	18.4261	-1.67212	0.409072	4.07971	4.50927e-05	0.000333192
PMO001909	GOLM1	29.8052	-0.892407	0.328926	2.7134	0.0066596	0.0224751
PMO001911	HNRPK	171.691	-0.82544	0.310577	2.65781	0.00786499	0.0257558
PMO001915	RASEF	6.05045	1.55101	0.566167	-2.69269	0.00708779	0.0236463
PMO001923	RS6	2515.28	-1.52281	0.317457	4.79623	1.61678e-06	1.74111e-05
PMO001924	PLIN2	1275.39	-2.46194	0.365127	6.73983	1.58568e-11	4.27562e-10
PMO001927	PSIP1	105.121	-1.43011	0.341545	4.18753	2.82006e-05	0.00022092
PMO001941	PGM5	69.8328	1.11822	0.326277	-3.42597	0.000612615	0.0030766
PMO001942	TNPO1	83.7013	-1.04317	0.381603	2.73269	0.00628185	0.0214278
PMO001947	NSA2	177.541	-1.09936	0.341062	3.22316	0.00126784	0.00568793
PMO001949	MED18	8.09247	-1.92026	0.453003	4.2183	2.46154e-05	0.000194861
PMO001956	K0020	101.83	-0.950423	0.389051	2.44282	0.0145728	0.0425423
PMO001967	CBWD1	30.0398	-0.9811	0.337601	2.90649	0.00365504	0.0137411
PMO001968		2.32832	2.1172	0.621064	-3.23538	0.00121481	0.00547341
PMO001977	UTP15	137.249	-1.04187	0.323195	3.22361	0.00126584	0.00568136
PMO001980	RIFK	44.5922	-1.86822	0.356388	5.23777	1.62531e-07	2.23432e-06
PMO001986	POLK	18.7423	1.05904	0.381502	-2.767	0.00565749	0.0196235
PMO001987	AGGF1	71.2687	-0.840643	0.348317	2.41388	0.0157836	0.0453945
PMO001991	CASP2	10.8002	1.32402	0.415606	-3.1708	0.00152019	0.00663833
PMO001992	CLCN1	28.1743	1.74634	0.561775	-3.11261	0.00185441	0.00784628
PMO001997	AT1B1	582.154	-0.764165	0.279178	2.7372	0.00619655	0.021185
PMO001998	GO45	43.4455	-1.43253	0.316076	4.53395	5.78905e-06	5.37357e-05
PMO002000	GTPB8	27.3809	1.10386	0.356966	-3.08711	0.00202112	0.00841918
PMO002016	MAAT1	3.46556	1.97552	0.622732	-3.0381	0.00238076	0.00966775
PMO002017	T2EA	35.1563	0.687541	0.268849	-2.55705	0.0105564	0.0327012
PMO002018	CTC1	33.3286	-0.906479	0.373516	2.42668	0.0152376	0.0441447
PMO002025	FBX40	123.632	2.7156	0.514441	-5.28068	1.28707e-07	1.80001e-06
PMO002035	C10	79.2274	3.88614	0.387957	-9.90544	3.94239e-23	3.28188e-21
PMO002038	C1S	13.3692	1.2356	0.367432	-3.34735	0.000815887	0.00392022
PMO002039	CSTN3	27.1301	1.71919	0.551753	-3.11669	0.00182893	0.00776665
PMO002044	EPHB5	8.54323	1.80773	0.536594	-3.32178	0.000894448	0.00422988
PMO002048	TBXT	1.12224	1.70904	0.712028	-2.41203	0.0158641	0.0455762
PMO002051	F162A	115.142	1.39896	0.48519	-2.88598	0.003902	0.0144827
PMO002054	UBP5	215.045	-1.01641	0.249851	4.06819	4.738e-05	0.000345838
PMO002063	WDR3	89.3301	0.995952	0.26188	-3.80275	0.000143101	0.000895576
PMO002065	AT1A1	3046.87	-0.819116	0.26119	3.13602	0.00171257	0.00733791
PMO002069	ZYX	181.29	-1.92873	0.327878	5.87994	4.10406e-09	7.82682e-08
PMO002074	EVL	2.1495	1.72957	0.699137	-2.55421	0.0106429	0.0329302
PMO002082	ARI4A	356.661	-1.56389	0.266376	5.8707	4.33955e-09	8.24592e-08
PMO002083	AP5M1	5.1251	2.29169	0.519155	-4.23074	2.32926e-05	0.000186075
PMO002090	C170B	13.5319	1.49073	0.521448	-2.83317	0.00460891	0.0165615
PMO002092	INF2	32.4255	1.3236	0.333066	-3.96434	7.35984e-05	0.000504888
PMO002095	APOP1	7.23948	2.61651	0.485863	-5.16116	2.4542e-07	3.22987e-06
PMO002096	TRM61	12.5909	-1.57737	0.431434	3.65297	0.00025922	0.00149476
PMO002100	LBH	5.74798	-1.97312	0.577776	3.39828	0.000678102	0.00335026
PMO002102	ZN839	25.5828	-1.21934	0.327669	3.72371	0.000196317	0.00117981
PMO002104	DYHC1	1509.49	-1.66623	0.174524	9.54708	1.33403e-21	9.20568e-20
PMO002112	PAPOA	197.052	0.736818	0.203287	-3.62453	0.000289488	0.00163513
PMO002117	GLRX5	296.459	3.60134	0.394254	-9.12294	7.31168e-20	4.538e-18
PMO002125	ZC3HE	230.427	-0.932509	0.318092	2.93175	0.00337057	0.0128841
PMO002126	SPAT7	6.49784	1.59232	0.484901	-3.23807	0.00120343	0.00543618
PMO002129	TYDP1	14.3376	-1.19459	0.407529	2.93143	0.00337407	0.0128928
PMO002131	PP4R4	23.8136	5.15276	0.59736	-7.84809	4.22432e-15	1.82341e-13
PMO002139	TNAP2	17.3121	1.9838	0.525311	-3.75272	0.000174928	0.00106986
PMO002148	ZFY21	24.5786	1.54738	0.378828	-4.06975	4.70629e-05	0.000343762
PMO002150	CP46A	37.5628	1.75034	0.526486	-3.32872	0.000872474	0.00413902
PMO002151	WDR25	5.04495	1.07928	0.42695	-2.50292	0.0123174	0.0370888
PMO002154	ARP10	243.804	1.63477	0.284615	-5.74345	9.2765e-09	1.66043e-07
PMO002157	CN159	6.21748	-3.08175	0.457228	6.50065	7.99742e-11	1.93283e-09
PMO002165	SMYD3	1.37311	2.489	0.67113	-3.70693	0.000209789	0.00124956
PMO002168	ELYS	54.7896	-0.885477	0.295165	2.99929	0.00270611	0.0107598
PMO002169	PURA2	370.787	-1.60378	0.326025	4.91816	8.73595e-07	1.00253e-05
PMO002183	MCFD2	8.52972	-1.33154	0.446247	2.98422	0.00284302	0.0111855
PMO002203	TGFB2	14.079	1.03671	0.382301	-2.70404	0.00685021	0.0229728
PMO002206	TREF1	18.1944	1.40743	0.419865	-3.34033	0.000836791	0.00399686
PMO002208	THADA	49.5424	1.62485	0.366461	-4.4279	9.51543e-06	8.31035e-05
PMO002209	SRBD1	23.7297	0.995037	0.374716	-2.65042	0.00803906	0.0262194
PMO002211	MEMO1	91.4203	-0.902916	0.309613	2.91637	0.0035413	0.0134227
PMO002217	NDUF7	163.793	-0.846126	0.262551	3.22303	0.00126842	0.0056881
PMO002220	NADAP	65.2418	-0.688525	0.229251	3.00374	0.00266685	0.0106359
PMO002223	VEGFA	5.50283	-1.31205	0.549954	2.39054	0.0168234	0.0478344
PMO002225	PLB1	20.6233	-2.63078	0.381907	6.85521	7.12059e-12	2.06379e-10
PMO002227	KS6C1	17.6416	1.41698	0.394414	-3.57337	0.000352419	0.00193232
PMO002228	DIEXF	35.817	-1.06318	0.292678	3.63373	0.00027935	0.00158813
PMO002235	FLVC1	66.7178	2.16417	0.379958	-5.67809	1.36206e-08	2.36926e-07
PMO002238	TATD3	25.5048	1.33174	0.326106	-4.07936	4.51595e-05	0.000333341
PMO002248	TIM9	4.83985	4.03174	0.621279	-6.32808	2.48227e-10	5.54924e-09
PMO002249	EXOC5	56.4516	1.01461	0.350183	-2.8949	0.00379275	0.0141624
PMO002253	BMP4	139.77	-0.890035	0.358059	2.48524	0.0129466	0.0386444
PMO002258	AHNK	218.087	1.58919	0.352976	-4.50126	6.75504e-06	6.13451e-05
PMO002263	BAG5	55.13	1.27311	0.449404	-2.82822	0.00468074	0.0167678
PMO002264	EX3L2	7.0211	4.1299	0.623589	-6.27703	3.45103e-10	7.60459e-09
PMO002271	MCATL	51.6555	-1.42821	0.417388	3.42037	0.000625356	0.00312648
PMO002274	ATG2B	222.897	1.07213	0.24348	-4.40219	1.07162e-05	9.25883e-05
PMO002289	ASB2	601.937	1.74193	0.514961	-3.3887	0.000702258	0.00344921
PMO002296	P4R3A	190.789	0.937223	0.260548	-3.59665	0.000322338	0.00179363
PMO002299	PTN21	117.27	1.41999	0.417783	-3.39682	0.000681731	0.00336661
PMO002302	FOXN3	81.2217	1.23833	0.468727	-2.64035	0.00828198	0.0268863
PMO002303	LGMN	250.745	-2.24017	0.371841	6.02108	1.73262e-09	3.50839e-08
PMO002304	CINP	13.8774	1.2814	0.423701	-3.02353	0.00249847	0.0100949
PMO002307	DAPLE	122.275	0.970907	0.408148	-2.37948	0.0173373	0.0489821
PMO002312	SYNE3	24.383	1.40413	0.40838	-3.42274	0.000619931	0.00310528
PMO002314	ITPK1	22.9152	3.58235	0.390558	-8.82046	1.13987e-18	6.53341e-17
PMO002318	NUP62	116.582	-1.95156	0.322097	6.05765	1.38128e-09	2.82973e-08
PMO002320	RL36A	302.544	-1.82979	0.373071	4.90389	9.39549e-07	1.07235e-05
PMO002323	FA8	258.866	1.00502	0.370125	-2.71542	0.00661915	0.0223525
PMO002325	ACRC	11.8942	-1.06524	0.41828	2.54698	0.010866	0.0335117
PMO002326	RHOG	11.4446	1.1276	0.379727	-2.95259	0.00315122	0.0121832
PMO002327	CHRD1	151.056	-2.16904	0.437903	4.95099	7.38376e-07	8.64378e-06
PMO002330	FOXO4	131.278	1.42747	0.375203	-3.80175	0.000143677	0.000898643
PMO002332	LRCH2	20.4994	3.39089	0.391334	-8.35775	6.3928e-17	3.19305e-15
PMO002335	CX04A	8.34504	-1.00561	0.346451	2.90444	0.00367915	0.013812
PMO002338	NXT2	1.36401	1.9402	0.655256	-2.88817	0.00387492	0.0143974
PMO002341	STAG2	472.296	1.0471	0.368678	-2.84022	0.00450825	0.0163003
PMO002342	AT1B4	221.811	-1.36041	0.268218	5.07184	3.93986e-07	4.96697e-06
PMO002344	NDUA1	12.8878	-3.02953	0.544808	5.50088	3.77908e-08	6.10767e-07
PMO002347	S2543	777.815	-1.0972	0.351847	3.11806	0.00182046	0.00773384
PMO002349	COMD5	19.727	1.02272	0.306599	-3.33098	0.000865408	0.00411744
PMO002351	WDR44	67.4856	1.66	0.323833	-5.1208	3.04243e-07	3.92523e-06
PMO002355	STK26	106.603	1.01139	0.314189	-3.2173	0.00129403	0.00578069
PMO002362	NIPA2	13.4558	1.73916	0.351386	-4.91085	9.06807e-07	1.03837e-05
PMO002366	DOC11	71.5898	1.11978	0.378021	-2.95951	0.00308129	0.0119525
PMO002367	ADT2	111.846	-2.72855	0.363705	7.49304	6.7297e-14	2.56922e-12
PMO002381	TAF1	307.323	0.641401	0.241825	-2.65235	0.00799344	0.0261112
PMO002393	CO8G	50.7332	2.78019	0.418112	-6.61931	3.60876e-11	9.23228e-10
PMO002396	RABL6	74.8394	-1.26859	0.197316	6.42916	1.28314e-10	2.97762e-09
PMO002404	ZN618	8.89356	-2.87381	0.457843	6.16788	6.92106e-10	1.46657e-08
PMO002406	RGS3	33.8691	2.01391	0.347788	-5.76535	8.14866e-09	1.4813e-07
PMO002408	PRP4	104.375	-1.19856	0.387013	3.096	0.00196152	0.00820349
PMO002411	LRSM1	126.062	-2.86525	0.38672	7.39936	1.36844e-13	5.03634e-12
PMO002412	RM41	101.269	0.834781	0.348487	-2.39601	0.0165746	0.0472549
PMO002414	NIBL1	142.278	1.09065	0.352851	-3.09027	0.00199973	0.00834333
PMO002418	MEGF9	48.7356	1.25979	0.42358	-2.97109	0.00296741	0.0115923
PMO002420	FOLC	54.8898	-2.09823	0.31421	6.67295	2.50715e-11	6.6074e-10
PMO002421	CDK9	63.3294	-1.09666	0.298128	3.67823	0.000234858	0.00137391
PMO002429	DOLK	29.8577	-1.12233	0.354767	3.164	0.00155618	0.00675612
PMO002435	CI078	209.957	-1.06061	0.237718	4.46195	8.12154e-06	7.21922e-05
PMO002436	FNBP1	115.247	1.0728	0.364103	-2.9458	0.00322122	0.0124218
PMO002439	FA78A	10.1451	2.6972	0.615326	-2.88056	0.0039697	0.0146976
PMO002440	MED27	69.9673	-0.862005	0.280542	3.0729	0.00211989	0.00876451
PMO002447	TTF1	43.8754	1.13994	0.324901	-3.50558	0.000455606	0.00239421
PMO002453	UCK1	40.8187	-1.10892	0.296706	3.73692	0.000186286	0.0011275
PMO002454	PTGES	7.57065	1.10235	0.438111	-2.50505	0.0122434	0.0369142
PMO002461	UAP1L	24.5916	1.45736	0.278805	-5.20954	1.89313e-07	2.57216e-06
PMO002464	VIR	103.144	1.21099	0.251434	-4.81334	1.48432e-06	1.60505e-05
PMO002467	QCR7	82.5147	-3.05484	0.426232	7.14733	8.84821e-13	2.91852e-11
PMO002468	MTG8	25.405	2.17489	0.442099	-4.88052	1.05807e-06	1.19334e-05
PMO002470	RB12B	79.9991	0.86	0.3018	-2.84877	0.00438882	0.0159786
PMO002471	MTEF3	129.269	-2.14706	0.238406	9.00223	2.21179e-19	1.31815e-17
PMO002477	ZN706	9.79409	-1.24336	0.459452	2.71145	0.00669893	0.0225715
PMO002482	MFTC	44.4572	1.53023	0.277732	-5.50132	3.76961e-08	6.10767e-07
PMO002486	SEH1	121.115	-0.774672	0.262875	2.94725	0.00320617	0.0123775
PMO002492	MTCL1	249.26	1.29533	0.456592	-2.83807	0.00453873	0.0163822
PMO002493	LRC30	8.59603	3.03549	0.651643	-4.4721	7.74538e-06	6.9437e-05
PMO002495	AKR	492.805	-0.812965	0.296558	2.7412	0.00612159	0.0209781
PMO002496	MLRN	63.008	3.90957	0.535714	-7.18488	6.7267e-13	2.26869e-11
PMO002501	ROCK1	105.627	0.886917	0.297452	-2.98097	0.00287337	0.0112753
PMO002507	T53I1	11.4828	1.43315	0.3941	-3.6075	0.000309156	0.00173131
PMO002509	VAPA	169.142	-1.58233	0.372699	4.24557	2.18041e-05	0.000175251
PMO002512	MLRN	148.545	-2.63159	0.394645	6.66146	2.71114e-11	7.12712e-10
PMO002516	LRAD4	143.716	-0.900463	0.204892	4.39502	1.10765e-05	9.53089e-05
PMO002517	PSMG2	113.159	-1.62737	0.368336	4.41683	1.00158e-05	8.70384e-05
PMO002519	TBB5	53.6769	1.76915	0.435746	-4.05998	4.90767e-05	0.000356239
PMO002540	E2F2	4.15305	3.36136	0.688585	-4.86605	1.13852e-06	1.27448e-05
PMO002542	TCEA3	1017.58	-2.50729	0.318671	7.86589	3.66492e-15	1.58849e-13
PMO002544	YRK	65.0264	2.07589	0.463897	-4.46762	7.90953e-06	7.04869e-05
PMO002547	ZBT8B	37.9774	-1.33289	0.437652	3.04213	0.00234909	0.00955393
PMO002548	ZBT8A	33.4447	-1.18784	0.428408	2.76874	0.00562741	0.019545
PMO002551	K1522	19.0991	-2.2346	0.441454	5.03818	4.69976e-07	5.79269e-06
PMO002552		3.64876	-2.26456	0.550264	4.04311	5.27469e-05	0.000380249
PMO002559	LYPA2	159.827	-4.4129	0.344479	12.7518	3.04748e-37	7.26479e-35
PMO002560	PNRC2	112.304	0.857425	0.273442	-3.13495	0.00171886	0.00735884
PMO002563	SRRM1	106.906	-7.81335	0.41146	15.4575	6.71763e-54	4.14478e-51
PMO002564	CLIC4	73.2097	1.37155	0.419736	-3.26384	0.00109912	0.00503434
PMO002566	TM50A	108.384	-0.892721	0.330223	2.70313	0.00686908	0.0230264
PMO002567	MACOI	173.709	-0.718069	0.237578	3.02269	0.00250537	0.0101111
PMO002568	ARH	28.0149	1.49624	0.287491	-5.18859	2.11887e-07	2.84569e-06
PMO002570	MFR1L	345.687	-1.38344	0.258179	5.35833	8.39942e-08	1.23391e-06
PMO002571	EXT1C	164.595	1.5647	0.472796	-3.31149	0.000927991	0.00436488
PMO002573	F110D	69.0202	2.17519	0.57679	-3.78148	0.0001559	0.00096531
PMO002574	ZN593	118.966	-1.09886	0.2761	3.97931	6.91163e-05	0.000479789
PMO002575	CNKR1	105.891	-1.20964	0.359769	3.36276	0.00077168	0.00374729
PMO002579	ARI1A	124.176	0.714717	0.280721	-2.54527	0.0109193	0.0336265
PMO002581	ZDH18	20.9386	1.41137	0.376612	-3.73611	0.000186889	0.00113049
PMO002582	1433S	2.16303	1.9301	0.681702	-2.76035	0.00577399	0.0199616
PMO002597	TINAL	911.86	1.27151	0.482508	-2.63757	0.00835018	0.0270815
PMO002599	MACF1	1538.92	2.03381	0.433136	-4.69935	2.60992e-06	2.69175e-05
PMO002607	NFYC	169.086	0.705741	0.249973	-2.82331	0.00475308	0.0169748
PMO002613	AFF1	79.7496	1.22594	0.365413	-3.35119	0.000804651	0.00387689
PMO002618	CSN4	362.977	-1.62006	0.280102	5.78363	7.31073e-09	1.3406e-07
PMO002623	PIGY	2.61315	-1.36433	0.564653	2.40798	0.016041	0.045971
PMO002624	GRIN3	4.19108	1.96657	0.543582	-3.4775	0.000506112	0.00261182
PMO002628	LTOR3	21.9757	-2.24756	0.369632	6.07379	1.24929e-09	2.58457e-08
PMO002630	H2AZ	44.5104	-2.22614	0.278589	7.98206	1.43916e-15	6.47871e-14
PMO002634	CFAI	0.983644	1.72665	0.727447	-2.39374	0.0166777	0.0475101
PMO002643	T2EB	31.65	-0.980533	0.248331	3.94934	7.83682e-05	0.000534463
PMO002645	TM10A	29.9547	1.03946	0.31835	-3.26509	0.00109428	0.00501878
PMO002649	TECRL	44.2851	2.29973	0.691449	-3.42233	0.000620859	0.00310845
PMO002657	AP1AR	5.68264	1.96368	0.481421	-3.97292	7.09978e-05	0.000489931
PMO002661	SH24A	2.2969	-2.41691	0.658205	3.59383	0.000325858	0.00180938
PMO002663	HPGDS	22.6754	2.10769	0.403667	-5.19304	2.06889e-07	2.7857e-06
PMO002664	TBCK	11.5026	-1.22164	0.373684	3.26847	0.00108129	0.00497222
PMO002665	NOA1	112.179	1.15464	0.31826	-3.62686	0.000286889	0.00162395
PMO002667	CASP6	4.07532	2.66922	0.563074	-4.46896	7.86009e-06	7.01823e-05
PMO002670	RGF1B	7.26062	1.53702	0.580709	-2.62688	0.00861709	0.0277594
PMO002678	RM14	166.902	-1.08519	0.401636	2.70205	0.00689133	0.0230863
PMO002685	GSC1L	71.8533	1.60398	0.4684	-3.41958	0.000627176	0.00313409
PMO002689	RD3	64.3371	1.24776	0.407003	-3.06184	0.00219978	0.00904843
PMO002691	NEK2	3.59588	3.22241	0.604936	-5.01318	5.3537e-07	6.48441e-06
PMO002694	NSL1	19.2032	1.0905	0.337112	-3.22829	0.00124534	0.00559654
PMO002696	BATF3	1.48494	-1.94252	0.727472	2.64726	0.00811477	0.0264335
PMO002697	PTN14	48.6331	1.5942	0.447287	-3.55467	0.00037846	0.00205363
PMO002699	MOCS1	59.4613	1.33262	0.369861	-3.59679	0.000322166	0.00179363
PMO002700	RHOQ	19.0213	-0.907759	0.36841	2.46289	0.0137823	0.0407218
PMO002706	S35B2	48.7893	-1.27335	0.264974	4.80492	1.54813e-06	1.67061e-05
PMO002710	EPAS1	797.525	1.50729	0.395511	-3.81195	0.000137873	0.000868039
PMO002712	MTA3	17.4726	-2.05151	0.45228	4.52767	5.96363e-06	5.51609e-05
PMO002714	ST65G	8.23213	1.30006	0.350673	-3.67859	0.000234524	0.00137273
PMO002720	EMAL4	25.3606	0.99003	0.398251	-2.4809	0.013105	0.039073
PMO002722	ERR3	49.54	1.14052	0.420446	-2.70994	0.00672958	0.0226312
PMO002732	CNST	43.2391	1.25427	0.372362	-3.362	0.000773792	0.00375581
PMO002746	HOP2	13.0933	-1.04657	0.387729	2.69951	0.00694419	0.0232263
PMO002751	KCNH4	43.4517	-7.48817	0.551344	12.7733	2.31286e-37	5.64177e-35
PMO002758	DNJC7	423.935	-0.684527	0.279459	2.44957	0.0143026	0.0419518
PMO002761	PLAK	283.881	-1.25051	0.289397	4.32056	1.55634e-05	0.000129662
PMO002768	SMCE1	98.668	-0.796154	0.271341	2.93495	0.00333597	0.0127658
PMO002771	TOP2A	1.13668	2.05558	0.704086	-2.93817	0.00330151	0.0126662
PMO002774	MED24	214.131	-1.05329	0.2893	3.641	0.000271582	0.00155238
PMO002775	LRC3B	7.96532	2.33551	0.527077	-4.31167	1.62027e-05	0.000133924
PMO002776	MIEN1	56.6937	6.0018	0.539517	-9.56592	1.11213e-21	7.77674e-20
PMO002786	BRCA1	9.34443	2.24131	0.387515	-5.65326	1.57436e-08	2.6895e-07
PMO002789	AASD1	83.0171	-0.88055	0.236121	3.72995	0.000191515	0.00115316
PMO002790	BECN1	274.499	-1.48609	0.256764	5.78746	7.14595e-09	1.31729e-07
PMO002791	KLH11	57.725	1.05848	0.438561	-2.41041	0.0159348	0.0457292
PMO002792	STA5B	759.247	-1.46312	0.266048	5.49901	3.81928e-08	6.16314e-07
PMO002803	CNKR2	70.9559	6.84587	0.596088	-10.5628	4.43404e-26	5.00093e-24
PMO002824	DGAT2	27.7113	2.87143	0.408808	-6.94043	3.90916e-12	1.18027e-10
PMO002830	HEPH	169.547	-2.49931	0.314979	7.92877	2.21328e-15	9.92098e-14
PMO002835	ARHG6	95.6075	2.39268	0.241791	-9.87075	5.57472e-23	4.49794e-21
PMO002838	DACH2	12.4318	1.04551	0.428324	-2.43443	0.0149153	0.043361
PMO002841	EDA	9.93016	1.09744	0.428089	-2.55377	0.0106565	0.0329528
PMO002848	ZC12B	16.8559	1.87667	0.46435	-3.99761	6.39859e-05	0.000449831
PMO002849	DIAP2	618.849	-2.3502	0.288395	8.14764	3.71101e-16	1.7613e-14
PMO002851	GP174	6.20295	2.93375	0.68114	-4.12868	3.64855e-05	0.000277478
PMO002861	GPR83	6.4419	-2.41703	0.609993	3.9095	9.24856e-05	0.000614364
PMO002871	CDYL1	10.4496	1.30964	0.406875	-3.20433	0.00135376	0.00601931
PMO002875	RREB1	150.811	-0.851316	0.355041	2.39745	0.0165095	0.047095
PMO002878	TM14C	21.5435	2.06957	0.565548	-2.4582	0.0139636	0.0411069
PMO002885	MCUR1	21.4136	2.85925	0.405923	-6.92333	4.41152e-12	1.31083e-10
PMO002896	NFAC1	147.682	1.23629	0.517089	-2.39334	0.0166957	0.0475485
PMO002900	GRHPR	48.9966	-2.64284	0.327332	8.06456	7.34998e-16	3.38131e-14
PMO002902	BRD9	139.772	-0.757568	0.290631	2.60696	0.00913509	0.0290844
PMO002908	BMP6	9.48229	1.46035	0.476199	-3.03598	0.00239755	0.00972838
PMO002911	ATP9B	96.5202	0.67202	0.246348	-2.72717	0.006388	0.0217474
PMO002917	RBFA	95.7704	0.857768	0.307738	-2.78757	0.00531058	0.0186796
PMO002920	RIOK1	92.393	-0.818233	0.334817	2.44427	0.0145144	0.0424189
PMO002921	NU153	372.376	0.670023	0.175979	-3.80708	0.000140616	0.000881078
PMO002931	RL9	530.3	1.70435	0.272443	-6.25586	3.95334e-10	8.6209e-09
PMO002937	UGDH	28.707	-1.25169	0.332965	3.75675	0.000172132	0.00105523
PMO002939	PRGC1	29.8056	1.75884	0.526118	-3.32978	0.00086915	0.00413055
PMO002941	LDB2	22.6048	1.00781	0.420137	-2.39277	0.0167219	0.0475973
PMO002943	TLR6	14.4568	-4.07225	0.407555	9.55792	1.20144e-21	8.34563e-20
PMO002945	PDS5A	230.206	1.02072	0.337525	-3.02389	0.00249548	0.0100867
PMO002946	RBM47	1.62442	-1.66143	0.682936	2.40294	0.0162641	0.0465214
PMO002951	SCFD2	22.0495	1.37596	0.390649	-3.50967	0.000448658	0.00236481
PMO002960	BD1L1	152.101	5.40313	0.385706	-13.5986	4.08064e-42	1.38071e-39
PMO002966	RHG07	39.663	0.997671	0.390102	-2.55261	0.0106918	0.0330328
PMO002973	VGFR2	247.198	1.16356	0.358238	-3.24728	0.00116516	0.0052952
PMO002977	ACSF4	52.5025	-0.796566	0.262246	3.03717	0.00238812	0.0096939
PMO002980	KCTD8	9.56768	2.36125	0.428384	-5.37357	7.71947e-08	1.14526e-06
PMO002982	CC149	1.88238	-1.66914	0.614765	2.66461	0.00770769	0.0253595
PMO002984	F184B	13.4197	1.56577	0.49106	-3.17655	0.00149039	0.00652997
PMO002996	VAX2A	2.20833	-1.75718	0.603849	2.85907	0.00424889	0.0155827
PMO003008	IDH3B	12620.6	-1.52621	0.331398	4.60463	4.13194e-06	4.01902e-05
PMO003012	IN80B	101.731	1.41832	0.386897	-3.66399	0.000248316	0.00144059
PMO003014	TTC31	94.013	1.69378	0.373029	-4.53734	5.69691e-06	5.30683e-05
PMO003021	FAKD5	150.65	1.4777	0.278437	-5.30585	1.1215e-07	1.60923e-06
PMO003026	SMOX	294.3	-0.941628	0.312064	3.0172	0.0025512	0.0102684
PMO003030	DOK1	23.2997	1.34586	0.524965	-2.55861	0.0105092	0.0325933
PMO003034	EXC6B	28.0458	1.25683	0.34776	-3.60312	0.00031442	0.0017561
PMO003037	IBP4	15.8822	0.936156	0.34121	-2.73626	0.00621424	0.0212386
PMO003047	RL27	1366	1.59936	0.401896	-3.98149	6.84837e-05	0.000476903
PMO003048	RUND1	144.576	-0.858038	0.232127	3.6966	0.000218502	0.00129192
PMO003050	AOC3	56.6286	1.69575	0.474655	-3.57066	0.000356078	0.00194831
PMO003052	WNK4	624.354	1.17644	0.448067	-2.62699	0.00861428	0.0277589
PMO003056	TBG1	308.804	-1.08476	0.207681	5.22314	1.75918e-07	2.40574e-06
PMO003058	COASY	163.815	0.966416	0.247555	-3.90358	9.47819e-05	0.000626839
PMO003063	FKB10	9.02039	1.84016	0.47934	-3.79311	0.000148771	0.000927741
PMO003071	PSMD3	1306.36	-0.897788	0.342903	2.61792	0.00884686	0.0283256
PMO003075	PNMT	2.03929	-3.05338	0.718942	4.17231	3.01521e-05	0.000234271
PMO003077	CDK12	288.962	-0.994947	0.15342	6.48499	8.87367e-11	2.11635e-09
PMO003082	DHX8	130.087	0.603001	0.193447	-3.11651	0.00183004	0.00776822
PMO003084	GSDMA	1.06548	-1.69363	0.710864	2.44877	0.0143344	0.0420335
PMO003091	CNTD1	8.75276	1.96326	0.445234	-4.34308	1.40497e-05	0.000118941
PMO003103	TPPC3	46.2337	-1.01644	0.271441	3.7461	0.000179606	0.00109401
PMO003106	RT15	203.747	-7.52059	0.411614	16.9549	1.76917e-64	1.5464e-61
PMO003108	EAF6	95.6684	1.36248	0.240658	-5.65948	1.51834e-08	2.6108e-07
PMO003109	SNIP1	177.163	4.22542	0.461247	-9.11742	7.69347e-20	4.71911e-18
PMO003110	NOG2	334.396	-0.895596	0.300929	2.97606	0.00291981	0.0114191
PMO003111	CA109	2.20414	-3.34987	0.662246	5.04515	4.53163e-07	5.62588e-06
PMO003118	MYCBP	44.1034	-6.12385	0.417637	13.107	3.00112e-39	8.99394e-37
PMO003121	XKR8	34.9262	-2.16656	0.365876	5.91099	3.40056e-09	6.59818e-08
PMO003127	PTPRU	71.925	1.99396	0.43958	-4.52541	6.02797e-06	5.56579e-05
PMO003129	41	204.591	1.19944	0.400645	-2.99325	0.00276022	0.0109294
PMO003130	TAF12	22.2364	1.13059	0.342754	-3.2984	0.000972383	0.00454516
PMO003132	PSB2	378.727	-1.84866	0.371231	4.97795	6.42623e-07	7.65962e-06
PMO003139	DCBD1	31.3239	1.51987	0.370303	-4.09781	4.17083e-05	0.000311904
PMO003140	ZEP3	25.6733	1.4052	0.378393	-3.69995	0.000215641	0.00127994
PMO003143	CTGF	3.7532	3.25031	0.622922	-4.92218	8.55849e-07	9.8432e-06
PMO003144	AIFM1	502.662	-0.801948	0.259271	3.09311	0.0019807	0.00827384
PMO003159	RRAGA	499.773	-1.67628	0.285188	5.87717	4.17332e-09	7.94446e-08
PMO003160	KLF8	34.5577	-1.29041	0.363087	3.55256	0.000381508	0.00206686
PMO003165	RPAC2	14.6176	-4.25446	0.558517	7.2135	5.45327e-13	1.85111e-11
PMO003167	TNF10	85.4828	1.82596	0.387058	-4.71144	2.45967e-06	2.54182e-05
PMO003169	ERC6L	7.1874	1.09567	0.402133	-2.71304	0.00666695	0.0224924
PMO003172	HDAC8	107.584	-0.998956	0.271811	3.67566	0.000237235	0.00138473
PMO003174	MAGT1	483.094	3.51313	0.251637	-13.9444	3.40128e-44	1.27414e-41
PMO003177	TMLH	199.856	-1.83215	0.192006	9.54109	1.41342e-21	9.68977e-20
PMO003184	RF12A	1401.3	-2.26529	0.24634	9.19484	3.75563e-20	2.38744e-18
PMO003195	GBRL2	15.4783	1.41416	0.373007	-3.78486	0.000153797	0.000952851
PMO003199	IST1	129.994	-0.952544	0.261727	3.63968	0.000272982	0.00155869
PMO003203	NOB1	108.931	0.961223	0.300352	-3.20016	0.00137351	0.00609424
PMO003204	TERF2	72.0249	1.55555	0.250249	-6.2092	5.32558e-10	1.14467e-08
PMO003209	VP9D1	43.5791	2.71478	0.424542	-6.35377	2.10096e-10	4.74935e-09
PMO003211	CHM1A	42.554	0.912365	0.37545	-2.42976	0.015109	0.0438391
PMO003217	GALNS	18.3091	1.12026	0.377853	-2.95702	0.00310623	0.0120359
PMO003219	MVD1	100.195	-4.15087	0.325841	12.6736	8.28463e-37	1.84888e-34
PMO003227	K0513	102.722	-5.06085	0.350588	14.2469	4.68814e-46	1.96696e-43
PMO003230	KLDC4	42.8829	-0.988135	0.365374	2.70539	0.0068225	0.0229142
PMO003235	RSPH1	1.15555	-1.74328	0.688568	2.51361	0.0119501	0.0362159
PMO003248	HSF2B	12.2127	-3.6784	0.623492	5.68818	1.28404e-08	2.24097e-07
PMO003264	USP9X	841.178	0.674125	0.260721	-2.58558	0.00972163	0.0306033
PMO003265	TTC3	115.605	1.03381	0.239023	-4.32307	1.5387e-05	0.000128703
PMO003266	DOP2	68.9413	1.33889	0.424343	-3.15171	0.00162315	0.00700628
PMO003269	WRB	3.55602	-4.27921	0.633142	6.76513	1.33188e-11	3.68605e-10
PMO003270	B3GT5	2.31228	2.5046	0.65934	-3.6618	0.000250454	0.00144978
PMO003271	CBS	3.97917	-1.79506	0.555373	3.20799	0.00133664	0.00595077
PMO003273	TSN7	99.5916	-1.53556	0.477849	3.21101	0.00132267	0.0058961
PMO003274	NYX	26.4395	1.39134	0.476984	-2.91515	0.00355513	0.0134578
PMO003279	CAF1B	20.6231	-1.51853	0.427552	3.5517	0.000382749	0.00207155
PMO003281	MX	1.9434	1.81326	0.685872	-2.67731	0.00742158	0.0245336
PMO003283		17.9088	5.56129	0.594596	-8.81973	1.14739e-18	6.54077e-17
PMO003286	FANCF	21.8556	1.70786	0.36473	-4.66696	3.05686e-06	3.09492e-05
PMO003293	T11L1	109.79	-3.54164	0.491828	7.17501	7.23015e-13	2.42213e-11
PMO003300	MET15	34.7326	-1.42882	0.30868	4.62829	3.68697e-06	3.62622e-05
PMO003301	KCNA4	11.4259	-4.46043	0.583224	7.12529	1.03865e-12	3.40449e-11
PMO003303	ORAV1	5.42107	3.44167	0.569121	-5.62699	1.83376e-08	3.10231e-07
PMO003308	GOGB1	861.977	0.840795	0.288439	-2.91514	0.00355531	0.0134578
PMO003312	KI18A	13.5884	-1.81334	0.554273	3.25727	0.00112488	0.00513665
PMO003313	RBTN2	315.392	2.90826	0.440547	-6.60356	4.01395e-11	1.01882e-09
PMO003319	BTBDA	142.687	-1.5126	0.239515	6.31492	2.70293e-10	6.00658e-09
PMO003325	FBX3	280.798	1.52879	0.324232	-4.715	2.41706e-06	2.51015e-05
PMO003327	DKK3	22.3781	-1.00246	0.407367	2.46008	0.0138908	0.04095
PMO003331	FRS1L	4.05314	-3.81185	0.64159	5.78412	7.28934e-09	1.33902e-07
PMO003332	E41LB	2.04214	-2.45824	0.690446	3.5893	0.000331562	0.00183523
PMO003336	ZN830	123.722	-1.59335	0.251801	6.32782	2.48655e-10	5.54924e-09
PMO003344	DYH5	3.03235	-2.46523	0.613767	3.90471	9.43367e-05	0.000624289
PMO003347	MSD3	10.762	1.59255	0.408704	-3.8669	0.000110228	0.00071679
PMO003348	INVS	26.034	0.845719	0.343005	-2.46112	0.0138506	0.0408661
PMO003352	LR16A	95.1552	1.06778	0.338092	-3.15602	0.00159938	0.00691222
PMO003354	ZN236	23.9793	2.07889	0.420191	-4.90592	9.29907e-07	1.0625e-05
PMO003366	CLP1L	34.6781	0.703833	0.282453	-2.49159	0.0127174	0.0381122
PMO003371	TM245	65.6765	0.886717	0.363016	-2.44085	0.0146527	0.0426922
PMO003373	TERT	15.355	1.39428	0.475011	-2.92113	0.0034876	0.0132637
PMO003376	F206A	6.70162	1.80207	0.537887	-3.3133	0.000922008	0.00434562
PMO003378	PCAT1	18.8442	3.27734	0.443848	-7.13875	9.41844e-13	3.09687e-11
PMO003387	TOR3A	35.9894	1.48889	0.443739	-3.34628	0.000819043	0.00392998
PMO003396	IER5	79.0251	2.85646	0.533357	-5.34422	9.08059e-08	1.32471e-06
PMO003397	RGSL	10.5742	-2.95251	0.427884	6.78352	1.17286e-11	3.28058e-10
PMO003402	NTM1B	5.65184	1.67604	0.613433	-2.69353	0.00707003	0.0236095
PMO003403	GORAB	17.0663	0.884284	0.277258	-3.1821	0.00146213	0.00643569
PMO003404	VAMP4	7.32744	-1.44691	0.499471	2.90213	0.00370637	0.0138992
PMO003405	ITPA	96.9072	-1.65548	0.289799	5.71092	1.12366e-08	1.98085e-07
PMO003408	TMCO1	86.4325	-2.61882	0.312354	8.3776	5.40172e-17	2.71094e-15
PMO003410	CA112	25.6929	-1.44183	0.33069	4.35978	1.30196e-05	0.000110666
PMO003412	RBG1L	48.2595	0.770929	0.247837	-3.10916	0.00187623	0.00791942
PMO003420	BRNP2	30.3882	-1.1357	0.468463	2.42315	0.0153868	0.0444255
PMO003422	FMO1	5.60334	3.87143	0.662466	-5.7563	8.59774e-09	1.55218e-07
PMO003424	MET13	37.3077	-0.842303	0.348783	2.41464	0.0157508	0.0453359
PMO003432	TRIM7	33.7134	1.63798	0.426943	-3.82777	0.00012931	0.000823515
PMO003436	KCNV2	12.4632	3.65457	0.605025	-5.66792	1.44544e-08	2.49361e-07
PMO003441	CATIN	310.037	-0.901919	0.334901	2.69283	0.00708492	0.0236442
PMO003443	MFS12	22.8556	-0.731306	0.284007	2.57622	0.00998869	0.031275
PMO003450	RORB	20.2868	2.4449	0.487016	-4.95642	7.18031e-07	8.45278e-06
PMO003452	MIS	18.5979	4.06642	0.434879	-8.60381	7.71105e-18	4.16913e-16
PMO003462	KLH24	27.0557	2.17388	0.464017	-4.66217	3.12895e-06	3.15573e-05
PMO003464	OAZ1	762.152	-0.815459	0.281331	2.89852	0.0037493	0.0140201
PMO003467	LMNB2	10.4006	0.922655	0.351585	-2.61292	0.00897719	0.0286642
PMO003473	ATG4B	43.0399	-0.721425	0.260386	2.77042	0.00559845	0.0194573
PMO003475	G3ST2	2.45707	2.16949	0.670428	-3.17778	0.00148406	0.00651271
PMO003476	NEUR4	4.05755	1.62428	0.524283	-3.02399	0.00249462	0.0100867
PMO003479	PIGX	7.72174	-1.25463	0.415897	3.01317	0.0025853	0.0103857
PMO003480	AQ12B	2.86566	-2.42196	0.629422	3.75067	0.000176362	0.00107675
PMO003482	STK25	77.2787	-0.92592	0.234847	3.94359	8.02707e-05	0.000544958
PMO003485	MTEF4	36.7188	-1.5741	0.291954	5.39088	7.01151e-08	1.05154e-06
PMO003489	SFT2C	7.76133	1.74419	0.499317	-3.44253	0.000576298	0.00292125
PMO003490	F168B	69.3877	1.52456	0.288068	-5.28374	1.26572e-07	1.78443e-06
PMO003493	SIAT1	14.42	-0.897716	0.342875	2.62081	0.00877209	0.0281636
PMO003503	CSTN2	5.72684	2.6013	0.559989	-4.3871	1.1487e-05	9.83567e-05
PMO003514	ETV5	28.0738	-1.82184	0.350138	5.19805	2.01385e-07	2.71857e-06
PMO003519	ZN292	27.5929	2.66182	0.398496	-6.58837	4.44668e-11	1.11661e-09
PMO003527	CREG1	536.183	2.80906	0.322537	-8.70741	3.10895e-18	1.71631e-16
PMO003535	VGLL3	2.266	-3.53026	0.639403	5.51166	3.55473e-08	5.79869e-07
PMO003546	IGSF3	10.1536	1.1953	0.450592	-2.63554	0.00840031	0.0271738
PMO003551	CRBG3	66.2882	1.0948	0.319422	-3.42453	0.000615862	0.00308785
PMO003560	NIP7	80.63	-1.85361	0.355658	5.20842	1.90456e-07	2.58434e-06
PMO003563	CADH1	50.5987	-7.16868	0.540034	11.7506	7.01198e-32	1.0816e-29
PMO003566	DEFI8	41.5615	-2.46473	0.394109	6.2423	4.31186e-10	9.34444e-09
PMO003567	TBB3	103.736	5.5638	0.384583	-13.6835	1.27404e-42	4.45448e-40
PMO003575	FOG1	71.3191	2.13472	0.516423	-4.12998	3.62791e-05	0.000276549
PMO003577	JPH3	2.47282	2.48729	0.694338	-3.62494	0.00028903	0.00163429
PMO003585	ZFHX3	90.0399	0.894324	0.323655	-2.76136	0.00575604	0.0199113
PMO003592	BANP	27.4013	0.845795	0.276273	-3.05786	0.00222927	0.00914104
PMO003594	ADAT1	291.618	4.98959	0.239983	-20.5799	4.15558e-94	2.17939e-90
PMO003595	DPEP1	6.54476	-1.58911	0.564787	2.809	0.00496955	0.0176517
PMO003608	AL14E	25.6442	-0.794972	0.292953	2.71545	0.00661867	0.0223525
PMO003614	LUZP2	6.68974	-1.461	0.404499	3.60868	0.000307754	0.0017253
PMO003624	LIPA1	123.987	1.42882	0.277241	-5.15081	2.59367e-07	3.40914e-06
PMO003627	ANO5	59.8521	1.22439	0.428481	-2.85296	0.00433146	0.0158247
PMO003628	NAT10	130.174	-1.4181	0.271448	5.22449	1.74631e-07	2.39126e-06
PMO003629	ANM3	47.6316	-0.710051	0.195308	3.63637	0.000276511	0.00157524
PMO003647	NUP53	28.6116	3.54304	0.331848	-10.3579	3.85327e-25	4.0417e-23
PMO003652	ZC3HF	444.188	-1.54838	0.315161	4.91255	8.98996e-07	1.03055e-05
PMO003654	ASND1	187.621	-1.71309	0.307598	5.56936	2.55683e-08	4.24345e-07
PMO003656	GLSL	43.7532	2.22051	0.408465	-5.40562	6.45857e-08	9.80375e-07
PMO003665	SOSB2	44.5951	-1.37933	0.278462	4.95292	7.31094e-07	8.5681e-06
PMO003667	LANC1	20.0721	1.03756	0.359281	-2.88261	0.00394398	0.0146126
PMO003669	KAL1L	52.0524	1.18441	0.332616	-3.55618	0.000376292	0.00204292
PMO003671	WDR75	83.0168	-1.44796	0.326292	4.43616	9.15771e-06	8.03809e-05
PMO003673	BARD1	1.95653	1.92555	0.652863	-2.8586	0.00425517	0.0156003
PMO003674	NB5R3	68.9343	0.685526	0.253198	-2.70657	0.0067982	0.0228473
PMO003680	GL8D2	6.92546	2.66704	0.472702	-5.3561	8.50355e-08	1.24746e-06
PMO003681	CL073	1.69419	-3.09804	0.663532	4.67424	2.95045e-06	3.00168e-05
PMO003683	ARHG5	11.7756	1.15938	0.456147	-2.52881	0.0114451	0.0349381
PMO003692	A4GAT	7.17279	4.25639	0.598841	-6.69432	2.16673e-11	5.72464e-10
PMO003693	LIPB1	164.013	0.68128	0.215882	-3.15538	0.0016029	0.00692454
PMO003701	ABCC9	102.558	-0.848424	0.298698	2.84069	0.00450154	0.0162928
PMO003705	STYK1	9.37012	2.56264	0.540128	-4.60386	4.14737e-06	4.02633e-05
PMO003708	LRMP	2.87628	3.04987	0.689372	-4.41197	1.02436e-05	8.89445e-05
PMO003722	ID2	26.56	1.67341	0.466708	-3.5725	0.000353593	0.00193673
PMO003734	R144A	78.6576	1.3055	0.384762	-3.39015	0.000698542	0.00343507
PMO003735	ASAP2	4.45221	1.41239	0.536997	-2.57761	0.00994861	0.0311588
PMO003742	TANC2	21.7627	1.47991	0.474077	-3.10334	0.0019135	0.00805404
PMO003743	ACE	61.2664	-1.51879	0.293784	5.16784	2.36817e-07	3.14428e-06
PMO003747	DDX42	89.692	0.864745	0.235791	-3.66546	0.000246896	0.00143394
PMO003751	B3AT	1379.22	1.91177	0.403526	-4.74013	2.13579e-06	2.23799e-05
PMO003754	LSM12	36.8332	-0.962649	0.267635	3.5972	0.000321665	0.00179274
PMO003764	ZN652	176.231	-1.26189	0.295166	4.27565	1.90581e-05	0.000154602
PMO003768	UBE2Z	50.0741	-3.36825	0.27436	12.2186	2.47317e-34	4.4726e-32
PMO003769	S2539	144.185	1.08489	0.293789	-3.69271	0.000221874	0.00130891
PMO003788	KCMF1	362.752	-2.74934	0.327335	8.39572	4.63055e-17	2.34637e-15
PMO003791	HINT1	141.332	-0.964255	0.364994	2.64127	0.00825956	0.0268301
PMO003802	FNTA	118.278	-0.920941	0.314665	2.92661	0.00342677	0.0130561
PMO003807	GA45G	109.063	-1.84312	0.527901	3.48616	0.000490004	0.00253935
PMO003816	NIBAN	22.4649	2.45838	0.46948	-5.1707	2.33217e-07	3.10433e-06
PMO003817	TRM1L	33.7436	-1.18941	0.274238	4.3369	1.4451e-05	0.000122042
PMO003818	TPR	332.866	-1.30803	0.192428	6.79748	1.06463e-11	3.00995e-10
PMO003835	VAV3	2.06478	1.7995	0.624802	-2.77059	0.00559549	0.0194573
PMO003852	TRIB1	211.633	-1.34557	0.450236	2.9869	0.0028182	0.0111062
PMO003861	ERG1	3.89316	1.64742	0.613672	-2.63684	0.00836833	0.0271138
PMO003863	COL10	2.22863	1.89777	0.645512	-2.91012	0.00361285	0.0136265
PMO003873	AMYP	59.7569	2.16814	0.4241	-5.10238	3.35414e-07	4.29044e-06
PMO003879	DEN1B	10.3395	1.68713	0.5295	-3.14775	0.0016453	0.00709019
PMO003880	ASPM	1.33214	1.95387	0.728743	-2.71156	0.00669673	0.0225713
PMO003888	SEN15	44.7418	-3.37555	0.329356	10.2002	1.97918e-24	1.80519e-22
PMO003890	SWT1	36.7339	2.26654	0.29558	-7.62589	2.42358e-14	9.77727e-13
PMO003897	KIF14	24.8054	5.30222	0.513513	-8.87122	7.23502e-19	4.16968e-17
PMO003901	F102B	35.0203	1.27882	0.481161	-2.65021	0.00804413	0.0262278
PMO003907	ARHGA	35.7446	2.89544	0.376892	-7.58344	3.36503e-14	1.33192e-12
PMO003910	SH3Y1	3.99726	2.11415	0.555321	-3.64153	0.000271023	0.00155173
PMO003914	TSSC1	5.53351	2.32216	0.498147	-4.47085	7.79076e-06	6.97842e-05
PMO003916	RNH1	52.0127	-7.75659	0.541974	13.367	9.43073e-41	3.09122e-38
PMO003919	ADA17	72.9421	0.914599	0.2384	-3.83357	0.000126298	0.000807274
PMO003922	DCOR	70.1153	-2.7017	0.381118	7.07437	1.50127e-12	4.83031e-11
PMO003925	E2F6	39.6905	1.13211	0.340972	-3.32006	0.000899967	0.00425406
PMO003931	MPSF	1622.94	1.99276	0.4317	-4.6199	3.83932e-06	3.75309e-05
PMO003935	O1030	1.36879	-2.80451	0.710554	3.90777	9.31535e-05	0.000617628
PMO003937	ABTB2	4.36212	2.67073	0.565135	-4.46395	8.04632e-06	7.16451e-05
PMO003953	DDB1	952.07	-1.15342	0.209478	5.50613	3.66812e-08	5.97437e-07
PMO003960	FRIH	9420.8	-0.907115	0.363477	2.4953	0.0125851	0.037748
PMO003962	TM258	5.5575	-1.47203	0.54791	2.68224	0.00731309	0.024236
PMO003963	R3GEF	28.784	0.734255	0.281735	-2.60351	0.0092275	0.0293028
PMO003964	FADS1	12.4071	3.38477	0.513555	-6.21907	5.00121e-10	1.0816e-08
PMO003971	COMD4	3.51293	1.36296	0.567855	-2.38133	0.0172501	0.0488093
PMO003976	TSN3	124.015	2.55915	0.211576	-12.0733	1.46142e-33	2.51293e-31
PMO003990	TBD2B	30.3074	1.22954	0.463987	-2.64303	0.00821676	0.0267325
PMO003991	ACBG1	20.6026	2.09557	0.484637	-4.30407	1.67689e-05	0.000137844
PMO003992	HERC1	1282.62	0.990771	0.362947	-2.73012	0.00633119	0.0215777
PMO003994	CL045	15.8757	-1.59068	0.355308	4.47295	7.71493e-06	6.92824e-05
PMO003996	ENPL	1179.91	-0.816503	0.322278	2.53341	0.0112959	0.0345833
PMO004003	SAM50	116.726	-1.97981	0.298476	6.63215	3.30837e-11	8.51348e-10
PMO004006	GBRL1	75.1206	-1.21245	0.424521	2.85444	0.00431134	0.0157732
PMO004008	NEUA	92.4273	-2.44524	0.291476	8.38465	5.08752e-17	2.56553e-15
PMO004013	PLPL2	6.09587	-1.74307	0.611366	2.83336	0.00460618	0.0165573
PMO004015	PARVB	31.2375	1.33379	0.353696	-3.76464	0.000166788	0.00102607
PMO004040	ADCY6	374.114	-0.865364	0.205033	4.22061	2.43644e-05	0.000193166
PMO004043	RND1	9.60002	2.10997	0.411813	-5.04056	4.64174e-07	5.73465e-06
PMO004052	WDR35	17.8817	-1.59704	0.487976	3.26597	0.00109088	0.00500537
PMO004054	PUM2	187.133	0.822455	0.319264	-2.57553	0.0100087	0.0313283
PMO004058	CB044	18.8141	-1.53367	0.311179	4.92568	8.40664e-07	9.74334e-06
PMO004060	SF3B6	37.136	1.69317	0.430086	-3.93866	8.19381e-05	0.000554841
PMO004064	FA49A	6.22039	1.23671	0.464456	-2.63597	0.00838982	0.0271608
PMO004069	SMC6	44.9548	0.97404	0.309752	-3.14312	0.0016716	0.00718287
PMO004071	QORX	2.88004	2.05968	0.686304	-3.099	0.00194177	0.00814689
PMO004075	TTPAL	16.8707	1.09787	0.353414	-3.09518	0.00196697	0.00821972
PMO004080	PKCB1	26.0496	1.88136	0.469342	-3.98381	6.78189e-05	0.000472659
PMO004086	TDIF1	83.4884	-3.4673	0.334327	10.3418	4.56009e-25	4.68229e-23
PMO004087	WFDC2	5.04413	1.73746	0.587874	-2.91767	0.00352659	0.0133781
PMO004088	TTI1	59.802	0.638411	0.230474	-2.76857	0.00563035	0.0195487
PMO004089	TGM2	172.356	-4.13519	0.356641	11.5569	6.81441e-31	9.65897e-29
PMO004090	PPGB	302.324	-1.15226	0.287393	4.00936	6.08834e-05	0.000430037
PMO004094	ZNFX1	93.1854	-0.97923	0.350614	2.79285	0.00522452	0.0184264
PMO004097	RSMB	189.507	-0.889897	0.297367	2.99242	0.00276771	0.0109499
PMO004101	GOSR2	6.06259	1.329	0.429302	-3.06658	0.00216521	0.00892371
PMO004103	NSF	62.1704	0.66449	0.183641	-3.61766	0.000297276	0.00167461
PMO004112	CD5R1	16.7545	1.59616	0.443624	-3.5761	0.000348753	0.00191422
PMO004116	RHG27	76.6707	1.96577	0.488611	-4.02155	5.78164e-05	0.000411702
PMO004121	U5S1	193.043	-0.753782	0.225057	3.34943	0.00080979	0.00389897
PMO004126	GRN	352.759	3.0477	0.316355	-9.62678	6.16295e-22	4.3975e-20
PMO004130	TBC23	31.1839	1.57453	0.333979	-4.69915	2.61245e-06	2.69175e-05
PMO004131	NIT2	20.3943	5.10081	0.539386	-8.3158	9.11327e-17	4.50892e-15
PMO004138	CD166	2.09996	1.95138	0.619493	-3.05121	0.00227921	0.00930945
PMO004141	FIL1L	942.943	1.49655	0.286734	-5.21936	1.79538e-07	2.44886e-06
PMO004149	TFG	50.0239	-1.21775	0.323847	3.76222	0.000168414	0.00103364
PMO004154	NSG1	2.31804	-2.30063	0.697991	3.32403	0.000887255	0.00419965
PMO004160	S3TC1	2.38407	-1.9194	0.672713	2.83795	0.00454049	0.0163829
PMO004167	TRM44	82.3223	-1.73554	0.378153	4.58709	4.4947e-06	4.2898e-05
PMO004168	K0232	310.155	1.71397	0.44025	-3.89408	9.85734e-05	0.000649458
PMO004169	CCL3	1.96852	2.70219	0.688337	-3.92555	8.65324e-05	0.000580703
PMO004171	MA2B2	60.082	-1.12458	0.276146	4.07255	4.65019e-05	0.000340851
PMO004174	MIER2	16.0111	1.05637	0.381967	-2.75767	0.00582156	0.0201061
PMO004182	SIN3B	453.055	1.32186	0.372951	-3.54442	0.000393479	0.00211869
PMO004184	MYO9B	83.9416	0.913	0.287834	-3.17014	0.00152364	0.00664786
PMO004186	MAST3	54.4646	1.3405	0.396225	-3.37805	0.000730019	0.00356977
PMO004187	ACBG2	227.627	2.03931	0.440048	-4.63611	3.55028e-06	3.50979e-05
PMO004188	AN32B	55.0365	-1.31563	0.320945	4.09919	4.14605e-05	0.000310406
PMO004192	SAFB2	393.445	-1.51338	0.279326	5.41772	6.03623e-08	9.3246e-07
PMO004196	P85B	89.6199	1.78019	0.397253	-4.47414	7.6719e-06	6.8955e-05
PMO004200	YPEL4	1.43228	1.86515	0.716527	-2.66153	0.00777867	0.0255609
PMO004201	UB2L3	2.25936	-2.20909	0.653252	3.28269	0.0010282	0.00476549
PMO004205	PSD13	670.443	-3.79179	0.343254	11.0387	2.48559e-28	3.25892e-26
PMO004210	RERG	51.674	-1.52265	0.314553	4.83835	1.3092e-06	1.43043e-05
PMO004212	RMD3	27.6589	-1.3715	0.395149	3.46741	0.000525508	0.00269538
PMO004213	MED19	27.0321	1.50826	0.348415	-4.32035	1.5578e-05	0.000129681
PMO004217	TIM10	7.90842	1.84667	0.457436	-3.97371	7.07615e-05	0.000488623
PMO004219	P2RX3	0.950433	-1.76015	0.727388	2.4258	0.0152749	0.0441981
PMO004226	NEMP1	17.2865	-1.21213	0.342461	3.5385	0.000402401	0.00215566
PMO004227	STAT6	117.798	-1.13777	0.314756	3.61413	0.000301359	0.00169488
PMO004232	ACV1B	197.679	-1.16375	0.312473	3.72356	0.000196433	0.00117981
PMO004238	BI1	307.868	-0.792476	0.244511	3.24123	0.00119015	0.00538376
PMO004249	FITM2	74.4347	1.04925	0.354989	-2.95412	0.00313558	0.0121361
PMO004254	EPB42	306.493	1.98248	0.36176	-5.48002	4.25275e-08	6.75865e-07
PMO004256	NEUL2	45.1794	-1.27842	0.36601	3.49064	0.000481863	0.00250708
PMO004259	CTBL1	129.839	-0.919091	0.29285	3.13871	0.00169692	0.00727974
PMO004261	RPR1B	142.524	1.0924	0.27534	-3.96595	7.31052e-05	0.000502491
PMO004267	JPH2	198.609	2.15964	0.511706	-4.22487	2.3908e-05	0.000190122
PMO004268	ELMO2	341.891	-1.2649	0.294003	4.30225	1.69073e-05	0.000138873
PMO004269	DDX27	180.863	-0.799032	0.293732	2.72064	0.00651559	0.0220905
PMO004279	SSRP1	482.352	-1.24438	0.328353	3.78928	0.000151084	0.000938815
PMO004282	IFM3	14.1083	-1.48359	0.397802	3.7212	0.000198276	0.00118883
PMO004286	ZDHC5	223.238	0.924687	0.231162	-3.99957	6.3457e-05	0.000446412
PMO004292	SIR3	114.715	-1.95097	0.338431	5.76124	8.34982e-09	1.51323e-07
PMO004295	SMBP2	157.304	-1.28279	0.318249	4.02997	5.57839e-05	0.000399125
PMO004301	PCYOX	98.4379	-1.72958	0.311467	5.55216	2.82164e-08	4.65348e-07
PMO004304	TM127	17.5528	-1.17664	0.353586	3.33093	0.000865568	0.00411744
PMO004305	STAR7	142.343	0.654875	0.233789	-2.801	0.00509448	0.0180283
PMO004307	ANR39	34.167	2.02564	0.557795	-3.62376	0.000290351	0.00163912
PMO004308	LMA2L	100.133	-0.646159	0.262718	2.45955	0.0139112	0.0409873
PMO004309	MTDC	103.168	2.13139	0.432392	-4.92259	8.54069e-07	9.8432e-06
PMO004311	ARI5A	445.666	-2.18902	0.461308	4.74051	2.13177e-06	2.23602e-05
PMO004313	PROM2	0.855724	1.74172	0.721734	-2.41455	0.0157546	0.0453359
PMO004324	LIPE	26.2065	-3.36587	0.46651	7.15491	8.37295e-13	2.77047e-11
PMO004328	MAOM	73.596	1.41843	0.500739	-2.8321	0.0046243	0.0166054
PMO004329	RNZ1	2.79821	2.43265	0.65349	-3.53054	0.000414715	0.00221484
PMO004336	SGPL1	12.0018	1.20493	0.388532	-3.08277	0.00205086	0.00852613
PMO004346	RUFY2	4.72169	1.94568	0.564908	-3.35124	0.000804496	0.00387689
PMO004348	S29A3	3.14014	2.23049	0.593709	-3.55875	0.000372619	0.00202508
PMO004350	GDC	23.9397	-1.61453	0.325777	4.95492	7.23607e-07	8.48983e-06
PMO004351	CTNA3	2.81437	3.05757	0.633957	-4.71219	2.45075e-06	2.5376e-05
PMO004355	RGS2	45.4684	-1.08828	0.397708	2.73456	0.00624642	0.0213138
PMO004358	HTAI2	65.456	1.66321	0.366309	-4.53747	5.69323e-06	5.30683e-05
PMO004362	CAPON	53.188	-1.33154	0.322664	4.12465	3.71295e-05	0.000281395
PMO004367	PPAC2	100.587	-1.30641	0.327028	3.99351	6.51021e-05	0.00045676
PMO004368	PRDX6	205.582	2.26364	0.273353	-8.27568	1.27729e-16	6.26053e-15
PMO004370	SERA	3.77512	1.49536	0.604488	-2.46048	0.0138752	0.0409158
PMO004372	CRIP2	45.5627	-4.37041	0.36321	11.846	2.25717e-32	3.64238e-30
PMO004375	FMO5	4.45966	-1.57173	0.531148	2.94674	0.00321145	0.0123933
PMO004376	FMO5	23.1535	-1.55308	0.30278	5.12797	2.92878e-07	3.80197e-06
PMO004388	DHTK1	500.854	-0.855572	0.322325	2.6543	0.00794728	0.0259895
PMO004390	MCM10	267.823	8.54144	0.553655	-13.3584	1.05752e-40	3.3613e-38
PMO004391	PRP18	277.288	-1.77272	0.274255	6.46264	1.02892e-10	2.41981e-09
PMO004397	ATPG	3832.82	1.20763	0.326536	-3.6988	0.000216624	0.00128303
PMO004406	ZNF91	20.572	-1.10349	0.337345	3.26893	0.00107956	0.00496645
PMO004408	ENPP4	146.07	1.266	0.327234	-3.86779	0.000109828	0.000714632
PMO004414	RHAG	77.1062	1.94641	0.408713	-4.75375	1.99681e-06	2.10922e-05
PMO004425	LY6E	10.1927	-1.13794	0.331685	3.42714	0.000609972	0.00306711
PMO004431	EF1D	660.255	-0.723934	0.294015	2.46219	0.0138092	0.0407783
PMO004432	LY6E	22.4236	2.18142	0.530113	-4.1139	3.89036e-05	0.000293568
PMO004434	MPRB	6.67765	1.31842	0.450247	-2.89308	0.00381485	0.0142045
PMO004437	ENPP5	151.418	1.95831	0.463061	-4.22835	2.35417e-05	0.000187636
PMO004438	PAFA	131.353	-1.7289	0.31426	5.50088	3.77903e-08	6.10767e-07
PMO004441	RCAN2	10.4055	1.98836	0.544514	-3.60217	0.000315573	0.00176066
PMO004465	ZN740	9.79274	-2.90237	0.424518	6.72783	1.72214e-11	4.59633e-10
PMO004468	INT9	70.8833	-1.09638	0.262219	4.18175	2.8927e-05	0.000225755
PMO004472	PINX1	26.2135	-3.09531	0.424474	7.24237	4.40923e-13	1.51634e-11
PMO004474	XKR6	1.51307	2.3214	0.708554	-3.28763	0.00101036	0.00469032
PMO004476	CATB	1412.77	-1.16673	0.341258	3.41839	0.000629922	0.00314481
PMO004483	CK5P3	40.4186	-1.49858	0.481596	3.10689	0.00189069	0.00797086
PMO004484	PNPO	73.1589	2.14009	0.390721	-5.46895	4.52703e-08	7.14379e-07
PMO004486	GP158	2.47727	-1.47476	0.557363	2.62269	0.00872391	0.0280261
PMO004487	CWC25	69.3378	-0.644272	0.268391	2.40095	0.0163526	0.0467235
PMO004490	PI42B	86.7711	1.26799	0.32786	-3.86458	0.000111281	0.00072274
PMO004499	CATK	32.075	-2.45924	0.452311	5.42032	5.94931e-08	9.23111e-07
PMO004500	ARNT	137.195	1.80517	0.288249	-6.2571	3.92209e-10	8.57058e-09
PMO004503	S27A3	39.8032	1.18712	0.476552	-2.49028	0.0127644	0.0382312
PMO004504	INT3	421.22	-1.13923	0.236642	4.814	1.47936e-06	1.60134e-05
PMO004506	RGMC	395.787	0.870152	0.338934	-2.56727	0.0102504	0.0319515
PMO004511	CD44	4.61751	1.68708	0.508897	-3.24242	0.00118519	0.00536997
PMO004517	API5	130.033	0.992678	0.277149	-3.5806	0.000342803	0.0018865
PMO004520	ALKB3	2.08039	2.98139	0.655164	-4.52196	6.12711e-06	5.65235e-05
PMO004521	CK096	20.2565	2.57532	0.535992	-4.74644	2.07025e-06	2.18021e-05
PMO004524	PRD11	17.5213	-1.1198	0.282092	3.96811	7.24449e-05	0.000498282
PMO004529	PRR5L	49.5823	-1.91281	0.356603	5.36175	8.24211e-08	1.2134e-06
PMO004531	UCHL3	6.35471	1.83275	0.452169	-3.98137	6.85187e-05	0.000476903
PMO004534	CLN5	64.1522	-2.21696	0.297176	7.4566	8.87813e-14	3.31398e-12
PMO004539	PIBF1	5.64799	1.64413	0.474501	-3.40657	0.000657842	0.00326864
PMO004540	BORA	6.8621	3.24606	0.585425	-5.16617	2.38945e-07	3.16451e-06
PMO004547	SACS	133.246	1.64387	0.327422	-5.01734	5.23925e-07	6.39006e-06
PMO004550	SAMH1	24.1983	1.73113	0.306096	-5.62827	1.82027e-08	3.08446e-07
PMO004551	RLGPB	97.5337	1.54785	0.50397	-3.07041	0.00213769	0.00882416
PMO004555	CHD6	80.7334	1.49318	0.380776	-3.91607	9.00023e-05	0.000599767
PMO004556	RHG39	197.308	1.17125	0.374028	-3.13067	0.00174409	0.00745469
PMO004561	VPS8	67.9349	-1.1067	0.352423	3.14158	0.00168036	0.00721463
PMO004565	DJB11	224.084	-1.78846	0.32149	5.56232	2.66211e-08	4.40425e-07
PMO004566	TRA2B	42.6143	-1.15604	0.283959	4.072	4.66102e-05	0.000340968
PMO004569	SO2A1	44.609	1.02814	0.279472	-3.67777	0.000235281	0.00137562
PMO004587	FOXJ2	48.0409	0.724397	0.289353	-2.50173	0.0123587	0.0371755
PMO004594	DIP2B	84.4886	1.93917	0.363174	-5.32841	9.90762e-08	1.43339e-06
PMO004609	NR4A2	14.2726	-1.84217	0.472271	3.88629	0.000101786	0.000666438
PMO004610	RPRM	12.0728	3.10731	0.592869	-5.01565	5.28555e-07	6.43788e-06
PMO004611	PR40A	384.898	-1.07381	0.276352	3.88573	0.000102022	0.000667569
PMO004616	CYTIP	3.59869	1.98575	0.686826	-2.82353	0.00474987	0.0169691
PMO004617	WSDU1	20.5617	-0.724309	0.296888	2.44086	0.0146525	0.0426922
PMO004618	BAZ2B	96.1786	1.2045	0.246125	-4.89147	1.00086e-06	1.13615e-05
PMO004622	STRP1	184.681	-1.14845	0.299419	3.83528	0.000125419	0.000803127
PMO004628	SAHH2	51.0501	1.07938	0.355231	-3.03491	0.0024061	0.00975178
PMO004642	BN3D2	7.8015	-1.00928	0.394438	2.55548	0.0106042	0.0328298
PMO004645	CABP2	14.3926	3.96433	0.517607	-6.92515	4.35512e-12	1.29775e-10
PMO004647	FNBP4	446.705	1.45385	0.473093	-3.07576	0.00209969	0.00870154
PMO004649	SPTB1	3065.02	1.4163	0.311973	-4.5403	5.61737e-06	5.24672e-05
PMO004660	XPA	183.136	-2.05277	0.293255	6.99809	2.59484e-12	7.95826e-11
PMO004670	HEMGN	64.742	1.23415	0.40278	-3.061	0.002206	0.00906692
PMO004671	CXA1	108.642	2.05007	0.315212	-6.49465	8.32284e-11	2.00686e-09
PMO004681	NT5D1	6.71292	-1.70976	0.533585	3.18358	0.00145465	0.00640545
PMO004687	GPTC1	87.0097	1.13446	0.255859	-4.43173	9.34808e-06	8.18464e-05
PMO004692	KCD15	3.91291	1.33344	0.511338	-2.57311	0.0100788	0.0314821
PMO004695	MIP18	13.8489	-2.63756	0.538336	4.89578	9.79173e-07	1.11394e-05
PMO004701	DPYD	35.6334	-2.27939	0.452461	5.02722	4.97644e-07	6.10519e-06
PMO004702	SAS6	59.8056	-0.844952	0.240271	3.5167	0.000436948	0.00231122
PMO004704	FRRS1	38.4009	1.28468	0.420003	-3.05292	0.00226627	0.0092638
PMO004710	ODB2	111.618	1.19875	0.326927	-3.66572	0.000246644	0.00143374
PMO004726	FGD3	21.3281	0.944525	0.33196	-2.84037	0.00450616	0.0163003
PMO004727	SUSD3	5.90929	-1.40015	0.527544	2.65718	0.0078797	0.0257959
PMO004729	WNK2	143.33	1.45654	0.40578	-3.589	0.000331945	0.00183638
PMO004731	DCTN2	261.488	-4.32549	0.334538	12.8989	4.56655e-38	1.16826e-35
PMO004738	PTBP2	14.763	1.29828	0.338207	-3.82045	0.000133207	0.000844237
PMO004741	PALMD	117.884	2.26966	0.501993	-4.52646	5.99786e-06	5.54287e-05
PMO004753	HDAC3	118.717	1.40639	0.289904	-4.84952	1.23759e-06	1.36706e-05
PMO004761	ICLN	139.25	-0.863107	0.215521	4.00505	6.2005e-05	0.000436783
PMO004763	LRC32	2.26982	1.93758	0.651582	-2.90784	0.00363934	0.0137017
PMO004764	OVOS	6.52473	4.39069	0.613459	-6.92727	4.29038e-12	1.2821e-10
PMO004768	RSF1	190.387	0.869254	0.239033	-3.63612	0.000276776	0.00157524
PMO004773	PERQ2	265.68	1.17183	0.182203	-6.43015	1.27477e-10	2.97762e-09
PMO004779	A16L1	150.59	-1.13977	0.253136	4.50275	6.70792e-06	6.11263e-05
PMO004783	PROC	12.9263	1.26745	0.504143	-2.50901	0.012107	0.0365967
PMO004784	PLCG1	237.834	1.189	0.396037	-3.00211	0.00268112	0.0106847
PMO004787	PSCA	1.55081	-1.61608	0.658323	2.42633	0.0152524	0.0441574
PMO004791	SYNC	226.399	1.09279	0.200013	-5.46298	4.6822e-08	7.35204e-07
PMO004796	LMAN1	54.881	-1.10382	0.219082	5.03794	4.70564e-07	5.79312e-06
PMO004803		83.6609	2.39166	0.457796	-5.21523	1.83584e-07	2.5008e-06
PMO004808	TM209	58.4054	-0.823429	0.202212	4.072	4.66107e-05	0.000340968
PMO004811	UBE2H	146.927	6.4113	0.383247	-15.2516	1.60626e-52	9.36002e-50
PMO004812	FBH1	77.9162	-1.19622	0.403183	2.96564	0.00302051	0.0117603
PMO004817	CSR2B	277.491	0.847725	0.327151	-2.59146	0.00955685	0.0302024
PMO004832	SCO1	85.2503	0.7331	0.283393	-2.58666	0.00969105	0.0305254
PMO004834	MYH4	3463.43	1.48157	0.519326	-2.85802	0.00426298	0.0156235
PMO004839	PJA2	70.1734	-3.70809	0.336767	10.9562	6.20691e-28	8.03756e-26
PMO004843	FXL17	37.8365	-5.09227	0.471171	10.3488	4.23718e-25	4.40037e-23
PMO004844	STYX	20.8628	5.32767	0.557407	-8.47342	2.38298e-17	1.21927e-15
PMO004845	PRS10	672.74	-1.28782	0.279718	4.60375	4.14955e-06	4.02633e-05
PMO004860	EAA2	8.57341	-4.07164	0.607581	6.25078	4.08398e-10	8.88731e-09
PMO004867	NUD19	38.398	-0.953317	0.338097	2.81855	0.00482416	0.0171877
PMO004869	ZN507	49.439	1.2085	0.475875	-2.53497	0.0112456	0.0344799
PMO004870	RMP	107.592	-0.831201	0.244012	3.40684	0.000657196	0.00326795
PMO004871	ZN536	3.01963	2.54349	0.712454	-3.58721	0.000334233	0.00184729
PMO004874	IF4H	146.457	-1.22166	0.206051	5.92856	3.056e-09	6.01875e-08
PMO004876	CLIP2	7.92319	0.962274	0.389428	-2.45581	0.0140569	0.0413121
PMO004881	SPNS2	20.998	1.13637	0.40098	-2.82367	0.00474772	0.0169672
PMO004884	BUB3	86.2638	-1.02661	0.252601	4.06489	4.8055e-05	0.000349791
PMO004899	SIA8A	7.8717	-1.48189	0.525892	2.80601	0.00501589	0.0177922
PMO004900	DNJC5	29.4349	-0.828306	0.340946	2.42926	0.0151297	0.0438748
PMO004907	IF172	17.4474	1.2954	0.430262	-3.0009	0.00269181	0.0107114
PMO004908	TRI54	356.631	-0.873078	0.285858	3.05412	0.00225719	0.00923027
PMO004926	ZN180	1.88408	-3.48502	0.662892	5.25623	1.47041e-07	2.0374e-06
PMO004937	PSA5	668.494	-1.54291	0.323428	4.76974	1.84462e-06	1.96628e-05
PMO004939	LYSC	1.81447	-2.84401	0.727591	3.80746	0.000140399	0.000880728
PMO004943	BL1S1	95.6554	-7.36381	0.445807	14.1301	2.47849e-45	9.99882e-43
PMO004944	RDH1	114.729	-5.00882	0.383791	12.908	4.05881e-38	1.09161e-35
PMO004968	DEAF1	18.4389	0.957585	0.384542	-2.48648	0.0129015	0.0385428
PMO004988	NBN	37.1582	2.05927	0.357532	-5.7437	9.26304e-09	1.66043e-07
PMO004992	ACKR1	5.04824	1.42666	0.541259	-2.61144	0.00901619	0.0287784
PMO004998	CADM3	9.62277	-1.89963	0.542085	3.47982	0.000501749	0.00259571
PMO005008	ANFY1	89.925	1.09907	0.405211	-2.71003	0.00672765	0.0226312
PMO005009	UB2G1	91.5023	-0.84893	0.287423	2.95401	0.00313672	0.0121361
PMO005010	ZZEF1	409.576	1.24643	0.439967	-2.83372	0.0046009	0.016544
PMO005012	NOL6	177.146	-0.830035	0.312695	2.65433	0.00794664	0.0259895
PMO005016	K1328	11.8323	-2.14542	0.527696	4.0413	5.31566e-05	0.000382769
PMO005017	AQP3	33.2386	1.54595	0.468878	-3.29102	0.000998262	0.00464335
PMO005023	TPGS2	4.47409	-2.2635	0.501711	4.434	9.25008e-06	8.11238e-05
PMO005039	CADH8	1.14205	-2.0851	0.7336	2.78679	0.00532328	0.0187118
PMO005047	ACER3	6.96688	2.83575	0.523788	-5.10015	3.39376e-07	4.33583e-06
PMO005048	GALT	24.0719	-0.932753	0.315737	2.95338	0.00314319	0.0121567
PMO005051	AP4A	12.647	-0.908336	0.337924	2.68724	0.00720442	0.0239288
PMO005052	UBAP1	47.6603	-0.894348	0.341946	2.61574	0.00890335	0.0284804
PMO005057	TIF1B	9.09407	-2.36663	0.573746	4.07751	4.5521e-05	0.000335066
PMO005061	LIMS2	80.6027	1.47522	0.488332	-3.01807	0.00254392	0.0102431
PMO005064	NGEF	3.13269	1.9585	0.561141	-3.32947	0.00087012	0.00413159
PMO005066	RT18B	385.221	3.58846	0.338704	-10.5842	3.52787e-26	4.15774e-24
PMO005071	ICAM5	16.9015	1.40443	0.560957	-2.50215	0.0123443	0.0371441
PMO005073	AT131	233.197	-2.7306	0.256302	10.6477	1.78802e-26	2.1312e-24
PMO005087	CNO6L	84.1881	1.482	0.232211	-6.37658	1.81088e-10	4.12023e-09
PMO005088	CCNI	665.265	-0.674154	0.204426	3.29788	0.000974184	0.00454852
PMO005090	TRI41	30.3353	-0.745314	0.294845	3.97933	6.91111e-05	0.000479789
PMO005110	CAD11	15.8437	1.12483	0.432576	-2.58827	0.00964592	0.0304106
PMO005111	SYPL2	456.556	-1.61756	0.363644	4.44718	8.70039e-06	7.66877e-05
PMO005113	GPR61	2.89963	-3.48646	0.626242	5.48996	4.02015e-08	6.45749e-07
PMO005114	AMPD2	84.3792	1.26722	0.426375	-2.97042	0.00297393	0.0116134
PMO005125	TRI35	18.3607	-3.35982	0.487415	6.79007	1.12078e-11	3.15169e-10
PMO005134	TRIM7	261.412	1.58765	0.22302	-7.11674	1.10508e-12	3.59974e-11
PMO005149	A13CA	39.311	0.827083	0.267668	-3.08613	0.0020278	0.00844365
PMO005154	UQCC1	62.4163	-1.77227	0.302451	5.85883	4.66133e-09	8.84135e-08
PMO005158	RPB1	41.9896	-1.19862	0.361849	3.31054	0.000931166	0.0043759
PMO005174	JIP3	57.2237	1.37888	0.460524	-2.98953	0.00279407	0.0110402
PMO005178	GSTCD	18.6481	-1.8422	0.334178	5.50417	3.70906e-08	6.03169e-07
PMO005203	ZN628	32.5584	-2.1558	0.318461	6.75997	1.38017e-11	3.77981e-10
PMO005211	RFESD	27.6745	-1.59813	0.42364	3.76967	0.000163461	0.00100678
PMO005226	KCNK3	2.4104	2.18042	0.676412	-3.16026	0.00157628	0.00681798
PMO005232	NACA	343.196	1.89785	0.392135	-4.84194	1.28576e-06	1.41218e-05
PMO005240	LENG1	0.82109	-2.11366	0.730246	2.84626	0.00442367	0.016072
PMO005241	GRWD1	51.5896	-1.96655	0.279778	7.02283	2.17418e-12	6.7872e-11
PMO005246	PPOX	25.486	-2.34062	0.451581	5.16516	2.40228e-07	3.1775e-06
PMO005249	PSB4	816.9	-1.42607	0.346421	4.11581	3.85823e-05	0.000291563
PMO005262	NFX1	84.8074	2.40726	0.334498	-7.17462	7.25093e-13	2.42213e-11
PMO005268	TDRKH	22.2865	2.13061	0.416166	-5.09483	3.49049e-07	4.43779e-06
PMO005269	RM09	766.994	-3.85176	0.310323	12.4026	2.52835e-35	4.91108e-33
PMO005274	DTX3	22.5733	1.36471	0.504436	-2.70252	0.00688157	0.0230609
PMO005282	S35B4	26.6232	-0.904948	0.291929	3.09924	0.0019402	0.00814355
PMO005286	TALDO	395.37	-3.17778	0.335672	9.46056	3.06291e-21	2.0727e-19
PMO005287	NAL12	7.54275	2.11284	0.522815	-3.96811	7.24455e-05	0.000498282
PMO005315	RAB43	2.84945	1.57074	0.655754	-2.45385	0.0141337	0.0415029
PMO005325	HUS1	21.7091	-1.11388	0.290076	3.84103	0.000122518	0.000787435
PMO005338	M21D2	8.53399	0.992612	0.415209	-2.38469	0.0170933	0.0484048
PMO005340	CR021	47.7831	2.54362	0.387484	-6.54573	5.92041e-11	1.45091e-09
PMO005346	TM223	65.3772	1.16005	0.418378	-2.77155	0.00557904	0.019422
PMO005386	OFUT2	103.4	-0.80385	0.26591	3.02329	0.0025004	0.0100989
PMO005388	CG043	14.4542	1.33941	0.408004	-3.27801	0.00104541	0.00483051
PMO005393	MLP3A	365.334	-3.39838	0.338636	10.0288	1.13914e-23	9.87476e-22
PMO005395	ILF3	288.922	-0.768148	0.219437	3.50062	0.000464178	0.00243236
PMO005406	RS19	99.3989	-8.09517	0.574649	13.0141	1.01748e-38	2.88441e-36
PMO005408	EIF3C	19.4193	5.65257	0.591048	-8.99658	2.32857e-19	1.37991e-17
PMO005411	NU6M	882.306	-10.7241	0.535504	17.3386	2.4044e-67	2.8022e-64
PMO005444	BOP1	5.59085	-4.73554	0.636446	7.3789	1.59598e-13	5.81257e-12
PMO005449	ZN774	4.67311	-4.40204	0.653749	6.69534	2.15164e-11	5.69913e-10
PMO005450	ZSCA2	3.79827	3.7238	0.634197	-5.76094	8.36489e-09	1.51323e-07
PMO005505	SCLT1	131.413	1.47001	0.341841	-4.30024	1.70611e-05	0.000139917
PMO005509		7.36509	-1.92258	0.474628	4.03266	5.51491e-05	0.000395392
PMO005616	PCDA3	20.5231	1.4572	0.409866	-3.54298	0.000395626	0.00212637
PMO005632	HA1F	189.362	-9.2416	0.527935	15.6606	2.8135e-55	1.96738e-52
PMO005665	ZN551	9.33537	-1.49669	0.500909	2.98181	0.00286552	0.0112571
PMO005678	MEN1	14.0174	-1.71519	0.324106	5.28495	1.25738e-07	1.77505e-06
PMO005686	APEX1	30.5755	2.91919	0.456183	-6.3078	2.83022e-10	6.27614e-09
PMO005687	SSRB	29.1212	-1.19155	0.458068	2.5997	0.00933053	0.0295942
PMO005702	ZFP2	1.80404	2.78727	0.66418	-4.18187	2.89121e-05	0.000225755
PMO005706	SGF29	44.2007	3.07314	0.467257	-6.5271	6.70547e-11	1.63948e-09
PMO005753	CCR8	1.02852	1.65552	0.707857	-2.37253	0.0176667	0.04976
PMO005755	TOPB1	39.6253	-0.974038	0.242561	4.01562	5.92909e-05	0.000420773
PMO005756	NPHP3	8.81216	-2.14333	0.439976	4.84728	1.25168e-06	1.37908e-05
PMO005759	EAF1	22.3561	-0.829742	0.331201	2.50706	0.012174	0.0367564
PMO005762	ABHD5	41.7769	-0.962193	0.368988	2.60575	0.00916735	0.0291471
PMO005763	TCAIM	17.8062	1.17242	0.483469	-2.42612	0.0152611	0.0441705
PMO005764	CKLF6	7.83457	-3.3639	0.494038	6.56061	5.35866e-11	1.32564e-09
PMO005765	OSB10	16.2903	-0.965629	0.305458	3.16125	0.00157095	0.00680491
PMO005768	NGLY1	185.207	-1.0607	0.243195	4.36171	1.2905e-05	0.000109781
PMO005778	HACL1	27.0034	-6.97861	0.555438	11.9906	3.98231e-33	6.63023e-31
PMO005781	3HIDH	80.1126	1.06344	0.391956	-2.71293	0.00666902	0.0224924
PMO005786	HXA6	7.53753	1.80006	0.452456	-3.92084	8.824e-05	0.000589898
PMO005787	HXA5	56.7388	1.34206	0.379923	-3.52799	0.000418721	0.00223169
PMO005791	ROA2	841.751	0.771748	0.262119	-2.94441	0.0032357	0.0124639
PMO005795	TRA2A	55.2515	-0.921217	0.364793	2.52647	0.0115215	0.0351203
PMO005799	RPA43	100.497	-1.09594	0.276814	3.95965	7.50606e-05	0.000513575
PMO005803	SNX13	37.7515	2.33821	0.437055	-5.30904	1.10203e-07	1.58345e-06
PMO005806	NDUA4	63.3759	3.85641	0.389244	-9.75149	1.81783e-22	1.38168e-20
PMO005808	COSA1	3.01521	3.00576	0.65415	-4.52781	5.95976e-06	5.51609e-05
PMO005813	SGCE	6.67954	-1.28896	0.402899	3.18902	0.00142757	0.00629943
PMO005814	TFPI2	2.42317	1.67028	0.617337	-2.6247	0.00867259	0.0279039
PMO005841	PAPD1	135.119	1.06062	0.295223	-3.59241	0.000327628	0.00181633
PMO005842	JCAD	980.067	1.27856	0.400045	-3.19683	0.00138946	0.0061494
PMO005844	ZEB1	137.859	0.766138	0.263268	-2.90949	0.00362017	0.0136491
PMO005855	XRCC2	7.8191	2.11505	0.458069	-4.51547	6.31755e-06	5.8076e-05
PMO005856	KMT2C	681.28	1.26837	0.338036	-3.75219	0.000175296	0.00107087
PMO005878	THNS1	18.1933	1.95552	0.353537	-5.48248	4.19396e-08	6.69157e-07
PMO005879	DPS1	25.3657	1.39344	0.412473	-3.37526	0.000737466	0.00360451
PMO005881	IDI1	25.1754	-1.53656	0.45166	3.4024	0.000667976	0.00330647
PMO005890	PEX1	76.3638	1.0844	0.374377	-2.89678	0.00377014	0.014088
PMO005894	AF10	200.748	1.01295	0.325168	-3.11434	0.00184355	0.00781057
PMO005898	RPP38	14.659	1.47217	0.372785	-3.93633	8.27368e-05	0.000559527
PMO005902	HXA10	21.892	1.34433	0.470749	-2.85101	0.00435811	0.0158999
PMO005909	CCNY	19.9112	0.921033	0.267577	-3.43515	0.000592233	0.00298651
PMO005914	MDR1	68.166	1.87819	0.35346	-5.30277	1.14061e-07	1.62995e-06
PMO005920	DC1L1	188.507	-0.739879	0.282048	2.62357	0.00870136	0.0279708
PMO005921	THB	2.06606	1.64671	0.63632	-2.5205	0.0117188	0.0356183
PMO005930	LMBR1	16.7022	1.09766	0.338684	-3.22957	0.00123976	0.00558104
PMO005934	SPAG6	2.39069	-2.90807	0.649122	4.38439	1.16309e-05	9.95075e-05
PMO005935	TOM7	2.11173	4.0446	0.631703	-2.45643	0.0140327	0.0412641
PMO005940	LAR4B	95.8803	1.56245	0.561792	-2.78606	0.00533538	0.018748
PMO005951	LYVE1	14.9642	2.14174	0.398506	-5.31159	1.08675e-07	1.56364e-06
PMO005952	MTMRD	42.3846	1.65528	0.401704	-4.10788	3.99314e-05	0.000299815
PMO005954	ASCL3	1.76815	1.87179	0.666607	-2.68706	0.00720838	0.0239344
PMO005961	SMAP	29.8908	-1.02833	0.372621	2.76022	0.00577631	0.019963
PMO005971	FR1OP	3.58576	-3.47497	0.609275	5.32924	9.86233e-08	1.42881e-06
PMO005974	KIF25	2.95967	-1.6168	0.656257	2.42933	0.0151266	0.0438748
PMO005981	TTC13	26.5483	1.34278	0.369393	-3.63201	0.000281224	0.00159792
PMO005982	CA198	6.31318	1.89275	0.454727	-4.06678	4.76669e-05	0.00034769
PMO005985	TAF5L	297.99	-1.0882	0.255755	4.25475	2.0928e-05	0.000168856
PMO005988	CCSAP	1.55966	2.02807	0.685785	-2.86714	0.00414201	0.015244
PMO005989	SPRTN	32.5016	-1.11695	0.315239	3.54493	0.000392714	0.00211565
PMO005990	TSNAX	40.2202	-1.4407	0.36753	3.9228	8.75241e-05	0.000586233
PMO005997	LEG8	25.4396	1.24794	0.330113	-3.77105	0.000162563	0.00100184
PMO006022	RF1ML	62.9144	-0.951886	0.219867	4.33042	1.48824e-05	0.000125237
PMO006023	SYNE1	278.097	1.77658	0.411889	-4.31324	1.60882e-05	0.000133083
PMO006027	THIC	79.5149	0.648976	0.238511	-2.72116	0.00650528	0.022075
PMO006028	RM18	124.536	-5.81563	0.390976	14.5405	6.7131e-48	3.06147e-45
PMO006030	MPRI	1303.6	-0.941465	0.307682	3.05957	0.00221652	0.00910655
PMO006035	VNN2	39.4842	-2.20626	0.450746	4.88929	1.01201e-06	1.14508e-05
PMO006037	MOXD1	2.47076	-1.70019	0.60673	2.75736	0.00582706	0.0201185
PMO006039	MED23	108.05	-0.817313	0.257902	3.16931	0.00152802	0.0066642
PMO006046	FBX11	281.334	1.15354	0.381645	-3.02272	0.00250516	0.0101111
PMO006054	RHG18	15.4056	-1.07003	0.437937	2.44357	0.0145427	0.042478
PMO006057	GTR12	35.8092	2.83546	0.4646	-6.0458	1.48667e-09	3.03378e-08
PMO006065	NRIP3	6.2256	4.29626	0.612006	-6.81241	9.59767e-12	2.75054e-10
PMO006069	AIG1	29.8512	-0.899612	0.341158	2.63748	0.00835244	0.0270815
PMO006073	NTPCR	6.16467	1.54609	0.511432	-3.00651	0.00264261	0.0105747
PMO006078	K0408	68.0343	1.78146	0.693112	-2.62375	0.00869679	0.0279646
PMO006079	NUP43	29.7231	-1.04252	0.237205	4.39416	1.11203e-05	9.5607e-05
PMO006093	LATS1	63.811	1.34447	0.432673	-3.10232	0.00192008	0.00806878
PMO006100	NU133	95.8466	-1.10979	0.224476	4.94396	7.65499e-07	8.94679e-06
PMO006114	CC28A	11.57	-1.01568	0.356077	2.85394	0.00431802	0.0157921
PMO006121	HEXA	64.0192	0.68666	0.287205	-2.39122	0.0167926	0.0477725
PMO006123	GRAM2	9.1326	1.01008	0.417802	-2.40992	0.0159559	0.0457708
PMO006128	PATL2	2.30504	-2.78587	0.627317	4.26422	2.00606e-05	0.000162358
PMO006129	SNX1	196.864	-1.39444	0.262943	5.3029	1.13975e-07	1.62995e-06
PMO006135	SHF	95.6486	-0.951426	0.250901	3.79173	0.000149601	0.000930705
PMO006136	MZT2A	38.4874	-1.17839	0.423889	2.77777	0.0054733	0.0191237
PMO006139	C2C4C	20.7943	-1.67924	0.520563	3.2185	0.00128862	0.005759
PMO006140	VP13C	88.9606	1.7299	0.37069	-4.65933	3.17236e-06	3.19337e-05
PMO006145	T2AG	4.67109	1.55699	0.472387	-3.24437	0.00117712	0.00534261
PMO006149	TM2D3	7.04279	-5.36478	0.580732	9.16944	4.75476e-20	3.00438e-18
PMO006150	ADAL	14.4237	2.13225	0.351493	-5.99544	2.02934e-09	4.08555e-08
PMO006151	LRC49	6.10761	1.25781	0.469098	-2.65922	0.00783209	0.0256882
PMO006159	PRTG	2.54575	2.51981	0.640568	-3.74412	0.000181025	0.00110202
PMO006162	RLP24	134.496	-0.599815	0.243767	2.46097	0.0138562	0.040871
PMO006166	MYO5A	11.7654	2.84021	0.470529	-5.82498	5.71192e-09	1.0737e-07
PMO006170	GLDN	9.59837	1.35624	0.429742	-3.13412	0.00172372	0.00737662
PMO006178	SH3G3	5.08614	1.768	0.497902	-3.46571	0.000528832	0.00270652
PMO006182	MEX3B	151.981	1.82041	0.286964	-6.3396	2.30368e-10	5.1964e-09
PMO006193	KLH25	39.4498	1.5796	0.274886	-5.73346	9.8405e-09	1.75838e-07
PMO006197	SYNEM	618.766	1.95729	0.362546	-5.39896	6.70273e-08	1.01013e-06
PMO006198	LRC28	32.6847	1.13247	0.350745	-3.22746	0.00124896	0.00561044
PMO006206	RASLC	23.3092	2.07876	0.398396	-5.17995	2.21946e-07	2.97697e-06
PMO006211	CO061	57.1116	5.48596	0.48342	-10.1447	3.49859e-24	3.13647e-22
PMO006224	ZN710	43.0436	0.917173	0.349784	-2.61975	0.00879942	0.0282168
PMO006228	TP53B	50.1698	1.28185	0.32906	-3.89094	9.98564e-05	0.000656653
PMO006232	DYXC1	9.10748	-1.5035	0.546581	2.76647	0.00566663	0.0196487
PMO006237	DET1	22.0731	0.878528	0.333793	-2.62581	0.00864424	0.0278298
PMO006238	RFX7	49.299	1.16781	0.488449	-2.38752	0.0169627	0.0481051
PMO006247	FMT	75.474	-1.30202	0.244213	5.3318	9.72425e-08	1.41076e-06
PMO006249	LYSM2	60.0672	1.45285	0.370029	-3.92492	8.67571e-05	0.000581838
PMO006252	DUT	36.4655	-1.13126	0.381665	2.96573	0.00301965	0.0117603
PMO006253	MFAP1	200.827	-1.17885	0.316585	3.72347	0.000196503	0.00117981
PMO006255	SERC4	1.20246	-2.07087	0.712684	2.94361	0.00324407	0.0124824
PMO006257	SMAD6	118.71	1.04717	0.434914	-2.40733	0.0160698	0.0460409
PMO006258	GALK2	51.9698	-1.19052	0.291348	4.08705	4.36885e-05	0.000324769
PMO006266	TRPM1	2.10476	3.44259	0.703096	-2.63141	0.00850322	0.0274522
PMO006273	TRIP4	85.72	-2.15936	0.351077	6.14657	7.91783e-10	1.66433e-08
PMO006282	VIP1	95.7834	1.47601	0.352589	-4.18418	2.86195e-05	0.000223688
PMO006283	TTL13	6.04607	1.53692	0.443	-3.42072	0.000624554	0.00312396
PMO006287	CHD2	381.894	-1.49215	0.275973	5.40626	6.4356e-08	9.79724e-07
PMO006289	RAM	13.9985	3.26535	0.535366	-5.83551	5.36278e-09	1.01169e-07
PMO006291	LRRK1	21.681	1.4147	0.493479	-2.8562	0.00428743	0.0157021
PMO006292	NEDD4	80.9539	1.12211	0.446428	-2.51183	0.0120107	0.0363684
PMO006294	ROAA	349.599	1.0084	0.236378	-4.2661	1.98918e-05	0.000161116
PMO006306	KIF3A	51.2252	1.58197	0.350675	-4.504	6.66874e-06	6.09307e-05
PMO006312	UBE2B	258.147	-1.41667	0.413548	3.42506	0.000614655	0.00308327
PMO006314	SC24A	626.141	-1.85016	0.307527	6.01542	1.79417e-09	3.62603e-08
PMO006330	SQSTM	3680.33	-1.57086	0.289689	5.42205	5.89181e-08	9.15543e-07
PMO006336	SYNPO	106.168	2.61985	0.473741	-5.52063	3.3778e-08	5.52726e-07
PMO006344	RM22	51.9095	1.99792	0.430216	-4.64375	3.42147e-06	3.40492e-05
PMO006353	SIMC1	54.6867	1.01448	0.427378	-2.37494	0.017552	0.0494802
PMO006354	HIG2A	38.6258	-5.28625	0.403651	12.432	1.75243e-35	3.46816e-33
PMO006358	NSD1	324.721	1.13451	0.306306	-3.70317	0.000212921	0.00126606
PMO006372	NEU1B	6.9193	1.92236	0.507588	-3.70191	0.000213979	0.00127163
PMO006375	AF1L1	6.6765	1.28795	0.482757	-2.64131	0.00825864	0.0268301
PMO006376	GRPE2	5.8184	1.19522	0.485211	-2.44375	0.0145354	0.0424685
PMO006377	PCYXL	40.1037	-2.49108	0.400705	6.20276	5.5483e-10	1.18526e-08
PMO006379	TRI25	15.8493	-1.07227	0.360172	2.97644	0.00291614	0.0114089
PMO006381	S26A2	2.64218	2.50257	0.641061	-3.72832	0.000192759	0.00115998
PMO006385	ADA1B	21.1167	-3.00652	0.381831	7.81174	5.64047e-15	2.405e-13
PMO006390	NFIP1	236.351	-2.95508	0.314897	9.3768	6.80076e-21	4.54352e-19
PMO006393	RHG26	40.3537	0.981144	0.355306	-2.75799	0.00581586	0.0200931
PMO006418	GLT10	12.4491	1.23756	0.438321	-2.80238	0.00507266	0.017962
PMO006421	MAML1	66.55	1.61182	0.464244	-3.46678	0.00052674	0.00270016
PMO006424	MYOTI	649.837	1.84097	0.481876	-3.82596	0.000130265	0.000828089
PMO006430	FGFR4	46.7029	1.45904	0.254946	-5.71307	1.10958e-08	1.96594e-07
PMO006433	GBRB2	1.9353	-2.6939	0.734181	3.57013	0.000356807	0.00195026
PMO006436	MYOZ3	134.46	2.24184	0.472908	-4.74155	2.12094e-06	2.22688e-05
PMO006438	LCP2	5.86343	1.87421	0.573277	-3.22839	0.00124487	0.00559654
PMO006440	ARH37	29.2825	1.95562	0.478647	-4.06658	4.77076e-05	0.000347745
PMO006441	RNF14	336.996	-1.88427	0.179206	10.514	7.44485e-26	8.2199e-24
PMO006447	S36A1	40.7676	1.25719	0.477143	-2.63076	0.00851946	0.0274871
PMO006449	PTPRG	47.2537	1.34362	0.255739	-5.24749	1.54185e-07	2.12238e-06
PMO006452	HGFL	21.9247	-1.06851	0.398089	2.68297	0.00729719	0.0241986
PMO006453	RBM6	52.5692	2.15665	0.312903	-6.87148	6.35375e-12	1.85639e-10
PMO006458	CA2D2	7.37802	1.61943	0.540531	-2.96818	0.00299565	0.0116851
PMO006468	GL8D1	30.8619	-1.2369	0.274324	4.51011	6.47928e-06	5.94586e-05
PMO006469	NT5D2	67.057	-1.14313	0.266719	4.28536	1.82444e-05	0.00014846
PMO006480	UBP4	1068.15	-1.1445	0.25026	4.57316	4.80415e-06	4.56025e-05
PMO006485	ABHD6	28.7023	1.96269	0.363804	-5.37009	7.86954e-08	1.16423e-06
PMO006488	CO7A1	90.8356	5.94266	0.4245	-12.6971	6.13892e-37	1.39981e-34
PMO006493	RPN1	530.242	-0.602385	0.249764	2.41188	0.0158705	0.045582
PMO006494	GATA2	36.433	1.17624	0.463287	-2.53388	0.0112808	0.0345597
PMO006501	TMM43	74.9157	-1.24073	0.294089	4.21864	2.45782e-05	0.000194714
PMO006504	CCD51	114.421	-0.892694	0.32781	2.7239	0.00645154	0.0219299
PMO006506	MTMRE	101.988	-0.753979	0.316847	2.38006	0.0173097	0.0489315
PMO006507	OGG1	70.8821	-1.67462	0.330763	5.06101	4.17043e-07	5.22001e-06
PMO006513	SC6A8	4827.02	-1.66183	0.295821	5.61706	1.94233e-08	3.2807e-07
PMO006515	SYQ	480.042	-0.990764	0.230577	4.29681	1.73273e-05	0.000141768
PMO006519	MCAT	1012.02	-1.10071	0.308813	3.56406	0.000365164	0.00199178
PMO006526	SAMC	49.6992	-6.70871	0.492877	11.5138	1.12368e-30	1.55083e-28
PMO006529	GP173	1.84827	2.05873	0.703863	-2.84208	0.00448199	0.0162277
PMO006533	CNTN4	10.7162	-3.38	0.480466	6.84917	7.42798e-12	2.14634e-10
PMO006536	ITPR1	116.123	1.19298	0.352613	-3.38179	0.000720149	0.00353304
PMO006539	ARL8B	44.083	-0.920245	0.311369	2.95577	0.00311886	0.0120804
PMO006540	EDEM1	80.637	0.644086	0.229466	-2.80611	0.00501432	0.0177922
PMO006550	TRH	2.14383	1.77684	0.665951	-2.65425	0.00794857	0.0259895
PMO006553	ZMY10	66.8205	1.93842	0.3978	-4.86922	1.12041e-06	1.25689e-05
PMO006557	JAGN1	64.6754	-1.17726	0.271662	4.33427	1.46246e-05	0.00012331
PMO006561	TRNT1	121.936	-0.97991	0.285513	3.43247	0.000598111	0.00301325
PMO006562	RBNS5	156.396	1.08811	0.214218	-5.07822	3.80978e-07	4.82036e-06
PMO006564	PLXB1	5.57218	1.77175	0.456732	-3.79175	0.000149591	0.000930705
PMO006571	SETD5	108.79	1.00997	0.318683	-3.16721	0.00153909	0.00670132
PMO006572	PLXA1	93.7134	0.952704	0.332013	-2.86755	0.00413662	0.0152331
PMO006573	MITF	348.517	0.89632	0.354229	-2.53012	0.0114025	0.0348385
PMO006574	FLNB	203.991	0.895598	0.360072	-2.48666	0.0128948	0.0385368
PMO006580	HEM1	4514.9	-1.19672	0.444428	2.69152	0.00711279	0.0236995
PMO006586	F264	113.54	1.07156	0.43924	-2.43941	0.0147111	0.0428268
PMO006592	ABHEB	4.2641	-1.56512	0.520172	3.00768	0.00263252	0.0105472
PMO006596	NEK4	23.4472	0.75016	0.288916	-2.59481	0.0094643	0.0299551
PMO006597	CC018	5.15746	-2.26554	0.604421	3.74842	0.000177955	0.00108522
PMO006600	SEM3D	18.5064	1.71799	0.42197	-4.05072	5.10598e-05	0.000369867
PMO006602	FACD2	5.47001	-1.31122	0.441299	2.96886	0.0029891	0.0116639
PMO006607	DTD2	23.9503	1.28563	0.389832	-3.29781	0.000974404	0.00454852
PMO006610	SPRE1	18.7672	-1.06782	0.41495	2.57071	0.010149	0.031673
PMO006615	IF2A	183.904	-0.669898	0.253058	2.64734	0.0081127	0.0264335
PMO006617	VTI1B	21.8936	-0.80774	0.280208	2.88234	0.00394734	0.0146199
PMO006620	EXD2	33.8942	1.42401	0.395261	-3.59364	0.000326087	0.0018097
PMO006624	TTC9A	3.01533	-1.40829	0.557851	2.51352	0.0119534	0.0362159
PMO006628	ACOT1	30.9754	-1.09757	0.349766	3.13681	0.00170798	0.00732121
PMO006630	PTGR2	205.911	1.13492	0.321655	-3.52873	0.000417557	0.00222767
PMO006631	UBR1	127.044	1.55804	0.317669	-4.90074	9.54766e-07	1.08854e-05
PMO006633	CDAN1	26.7329	2.18843	0.475199	-4.56801	4.92369e-06	4.64993e-05
PMO006640	SPTN5	19.2137	-1.45956	0.455086	3.20216	0.00136403	0.00605983
PMO006650	ATG13	272.535	-0.710915	0.293193	2.42451	0.0153289	0.0443055
PMO006653	PTPM1	83.2649	-0.90652	0.219564	4.12884	3.64591e-05	0.000277478
PMO006656	FUT8	27.7761	0.899148	0.361005	-2.48772	0.0128565	0.0384741
PMO006671	EI2BB	228.188	-1.2245	0.231846	5.28142	1.28183e-07	1.79508e-06
PMO006676	TTLL5	8.68182	1.15051	0.37789	-3.0316	0.00243264	0.00985554
PMO006681	MAAI	9.16601	3.41253	0.629468	-5.14633	2.65626e-07	3.47835e-06
PMO006685	DDB2	18.0405	0.786088	0.311635	-2.52026	0.0117267	0.035632
PMO006687	CIA30	191.238	0.714911	0.295187	-2.42198	0.0154362	0.0445297
PMO006689	ZN106	361.579	1.7388	0.488985	-3.56003	0.000370806	0.00201941
PMO006690	DCAF4	36.0555	-1.04205	0.333446	3.12513	0.00177726	0.00758719
PMO006694	AHSA1	473.471	-0.872088	0.296207	2.94417	0.00323823	0.0124645
PMO006699	FA98B	71.0255	-1.19872	0.313534	3.8228	0.000131944	0.000837244
PMO006709	PSN1	170.617	2.28846	0.291295	-7.84753	4.24305e-15	1.82399e-13
PMO006720	MADD	38.1863	1.04054	0.327857	-3.16848	0.00153237	0.00667764
PMO006724	VASH1	197.658	2.40644	0.379449	-6.33659	2.34902e-10	5.276e-09
PMO006728	RPAP1	38.8858	1.07208	0.225763	-4.74332	2.10246e-06	2.21191e-05
PMO006732	NPC2	21.4621	-0.971932	0.269718	3.60408	0.000313258	0.00175054
PMO006735	INO80	102.774	0.608428	0.239227	-2.54236	0.0110108	0.0338986
PMO006738	BRM1L	24.3564	1.7509	0.298809	-5.83363	5.42334e-09	1.02128e-07
PMO006739	ZFY26	77.718	1.13943	0.456888	-2.49174	0.012712	0.0381069
PMO006744	BCAP	11.9501	1.59203	0.440845	-3.58237	0.000340495	0.00187576
PMO006748	CP2H1	2.97259	-2.51491	0.638421	3.83659	0.000124754	0.000799845
PMO006759	ACTA	205.736	1.96167	0.220736	-4.75207	2.01342e-06	2.12249e-05
PMO006761	PANK1	167.314	-1.28374	0.311119	4.12549	3.69939e-05	0.000280571
PMO006762	5HT7R	5.58815	2.13866	0.533536	-3.8752	0.000106539	0.000694091
PMO006768	KIF11	4.38953	1.60983	0.51193	-3.07443	0.00210908	0.00873011
PMO006769	MARH5	63.0615	-0.729872	0.253904	2.87493	0.00404113	0.0149251
PMO006770	DUS11	44.3978	1.35344	0.413697	-3.26804	0.00108294	0.00497764
PMO006772	ENTP7	16.3914	1.77067	0.4431	-3.97995	6.89308e-05	0.000479453
PMO006773	NKX23	2.65528	2.82518	0.670242	-4.14959	3.33075e-05	0.00025613
PMO006778	P4K2A	87.2884	-0.802032	0.235414	3.40676	0.000657391	0.00326795
PMO006780	UBTD1	122.748	-1.2175	0.334663	3.6369	0.000275943	0.00157303
PMO006795	5NTC	264.167	-1.89166	0.387657	4.87737	1.07511e-06	1.20996e-05
PMO006803	CFA43	0.876923	1.72884	0.720087	-2.41398	0.0157793	0.0453945
PMO006806	SPF30	67.2076	-0.914401	0.306947	2.97986	0.00288383	0.0113036
PMO006810	GFRA1	2.56137	2.12527	0.614925	-3.37219	0.00074572	0.00363469
PMO006821	FGFR2	8.68453	1.01781	0.378047	-2.68035	0.00735458	0.0243296
PMO006822	ATE1	35.8226	1.83766	0.477491	-3.83619	0.000124957	0.000800654
PMO006831	SPD2A	15.1298	1.84198	0.459009	-3.97379	7.07367e-05	0.000488623
PMO006833	ZDHC6	251.524	-0.803019	0.296223	2.71106	0.00670692	0.0225839
PMO006834	HS12A	14.7374	1.41562	0.373221	-3.77178	0.000162087	0.000999491
PMO006838	BTAF1	203.582	1.07144	0.327343	-3.27218	0.00106721	0.00491608
PMO006843	FA21A	200.905	-0.60288	0.246465	2.44624	0.0144357	0.0422477
PMO006845	CUE2A	68.7595	-1.4278	0.371092	3.84875	0.00011872	0.000765367
PMO006850	EXOC6	34.1744	1.64931	0.43953	-3.74355	0.000181441	0.00110327
PMO006853	AGRA3	16.2942	2.77746	0.408842	-6.63141	3.32487e-11	8.52678e-10
PMO006854	CNNM1	2.9892	2.26025	0.682523	-3.17525	0.00149705	0.00655092
PMO006856	XPP1	99.1227	-1.48157	0.328906	4.50511	6.63383e-06	6.06646e-05
PMO006857	GPAT1	205.028	1.31718	0.533387	-2.47296	0.0133998	0.0398046
PMO006863	STN1	12.6713	2.31943	0.384886	-5.92034	3.21278e-09	6.2871e-08
PMO006864	MCMBP	116.121	-1.08643	0.304746	3.56557	0.000363066	0.00198137
PMO006880	T22D2	210.214	0.946548	0.317609	-2.97947	0.00288746	0.0113094
PMO006881	EIF2A	152.502	-0.631942	0.23933	2.64071	0.00827326	0.0268663
PMO006889	PARPT	233.751	-0.935675	0.381932	2.44967	0.0142987	0.0419518
PMO006897	MFSD1	150.75	0.718322	0.275679	-2.60541	0.00917643	0.0291583
PMO006913	NDUB5	1686.46	1.08933	0.339393	-3.21011	0.00132686	0.00591223
PMO006917	RPAB3	34.1872	-0.846921	0.297768	2.84405	0.00445444	0.0161558
PMO006921	ALG3	39.0447	-1.14707	0.348492	3.29189	0.000995153	0.00463712
PMO006922	RNPL1	116.721	1.06847	0.334852	-3.18994	0.00142303	0.00628376
PMO006925	IF4E2	93.6659	-0.795457	0.306803	2.59309	0.00951173	0.0300779
PMO006936	CCD50	48.6045	1.58864	0.490086	-3.2374	0.00120623	0.00544647
PMO006943	RFC4	28.3147	-1.32916	0.28964	4.58748	4.48621e-06	4.2856e-05
PMO006952	NEP	92.182	1.5894	0.541544	-2.93915	0.00329111	0.0126495
PMO006956	LPP	13.3582	-1.01614	0.38702	2.62604	0.00863854	0.02782
PMO006966	RUBIC	37.6565	1.64352	0.356186	-4.59985	4.22791e-06	4.08348e-05
PMO006968	B3GL1	3.9394	2.85517	0.701024	-4.14033	3.468e-05	0.0002661
PMO006974	PK3CA	164.678	1.12333	0.397869	-2.82251	0.00476496	0.0170114
PMO006975	ZN639	81.6602	0.606869	0.225838	-2.68734	0.00720243	0.0239288
PMO006976	MBNL1	302.199	1.61215	0.361645	-4.45681	8.31895e-06	7.38219e-05
PMO006981	HDAC2	127.384	-0.803308	0.226769	3.54295	0.000395679	0.00212637
PMO006983	S22AG	156.503	4.78626	0.447464	-10.5383	5.75445e-26	6.42111e-24
PMO006986	KAD9	7.76358	4.09663	0.576414	-6.55042	5.73772e-11	1.40944e-09
PMO006987	MUC24	29.4832	1.56486	0.381968	-4.08232	4.45878e-05	0.000330517
PMO006990	OSTM1	31.0144	1.04432	0.378605	-2.75301	0.00590496	0.0203674
PMO006992	SEC63	183.476	1.19874	0.223788	-5.35542	8.53588e-08	1.24871e-06
PMO006999	HACE1	18.0763	1.76404	0.323975	-5.40861	6.35143e-08	9.71139e-07
PMO007000	UBP45	370.477	0.809963	0.233536	-3.46823	0.000523903	0.00268846
PMO007006	MDN1	148.756	0.852153	0.223211	-3.81676	0.000135214	0.000854372
PMO007007	LYRM2	11.2096	4.48651	0.58591	-7.02173	2.19134e-12	6.82047e-11
PMO007009	GBRR1	1.61432	2.29804	0.711131	-3.25815	0.00112142	0.00512586
PMO007011	MCE1	17.066	1.12544	0.429205	-2.6169	0.00887333	0.0284017
PMO007013	AKIR2	83.1053	-0.738363	0.280879	2.62949	0.00855132	0.0275782
PMO007017	MAOX	158.577	-1.47988	0.300005	4.933	8.09773e-07	9.41652e-06
PMO007018	AGM1	14.5544	-1.1857	0.339236	3.49888	0.000467215	0.00244298
PMO007025	CX7A2	173.14	-2.62869	0.399477	6.57269	4.94156e-11	1.22825e-09
PMO007026	COCA1	15.2856	3.03058	0.518923	-5.64834	1.62001e-08	2.75848e-07
PMO007030	OGRL1	7.06945	2.71677	0.533107	-4.83138	1.35592e-06	1.47994e-05
PMO007040	DYST	564.708	1.09921	0.350429	-3.13712	0.00170615	0.00731636
PMO007044	KLH31	304.355	1.93647	0.652923	-3.00378	0.00266647	0.0106359
PMO007048	GSTA3	217.975	4.53511	0.370639	-12.1241	7.87299e-34	1.37633e-31
PMO007051	MMS22	3.88513	-1.57829	0.57203	2.74347	0.00607941	0.0208661
PMO007052	FBXL4	152.058	-1.92374	0.363045	5.29541	1.18751e-07	1.68557e-06
PMO007058	CC50A	208.923	0.637548	0.227983	-2.79593	0.00517501	0.0182579
PMO007059	LAMA4	22.1721	1.40286	0.481979	-2.90431	0.00368059	0.0138124
PMO007068	SESN1	1455.61	-1.48337	0.275963	5.37479	7.66736e-08	1.13948e-06
PMO007075	ICK	76.3482	2.58182	0.33872	-7.58977	3.20474e-14	1.27328e-12
PMO007076	SYRM	14.8331	-2.18028	0.318967	6.81046	9.72855e-12	2.7729e-10
PMO007078	IBTK	146.706	1.60675	0.347153	-4.626	3.72797e-06	3.65788e-05
PMO007083	CE162	11.9863	1.9288	0.422829	-4.51048	6.46817e-06	5.94086e-05
PMO007094	PPR3D	38.6386	2.07017	0.554604	-3.71973	0.000199437	0.00119469
PMO007095	CDYL2	1.25737	1.75823	0.682225	-2.52676	0.011512	0.0351117
PMO007097	PSF3	8.08409	1.6287	0.405753	-3.97237	7.11608e-05	0.000490411
PMO007103	RPB3	152.864	-0.784217	0.328333	2.38864	0.0169109	0.0480311
PMO007107	F192A	17.041	2.77812	0.376738	-7.21763	5.29018e-13	1.80745e-11
PMO007116	PKH4B	95.1679	1.56956	0.429482	-3.65111	0.000261112	0.00150318
PMO007117	AATM	3253.69	-0.980316	0.365659	2.68052	0.00735078	0.0243296
PMO007118	IL34	4.24556	3.4813	0.678667	-5.09141	3.55404e-07	4.51312e-06
PMO007124	LDHD	151.745	-2.28605	0.281465	8.11914	4.69517e-16	2.21836e-14
PMO007131	OSGI1	334.574	1.75488	0.351517	-4.99178	5.98245e-07	7.20436e-06
PMO007132	S7A6O	61.2325	-1.12371	0.270534	4.15344	3.27508e-05	0.000252405
PMO007144	LONP2	389.381	-1.06886	0.261445	4.08822	4.34704e-05	0.000323377
PMO007145	BORE2	1.90095	2.35413	0.685621	-3.45009	0.000560398	0.00284926
PMO007146	ALAT2	12.4878	-1.0313	0.415598	2.47606	0.013284	0.0394942
PMO007151	CAD13	150.617	1.15136	0.329124	-3.49752	0.0004696	0.00245301
PMO007153	CENPN	1.87631	-1.87589	0.613838	2.99233	0.00276853	0.0109499
PMO007154	NDR4A	14.0007	2.76651	0.609338	-4.487	7.22317e-06	6.50892e-05
PMO007156	SL9A5	82.2086	2.88794	0.380653	-7.55035	4.3408e-14	1.6801e-12
PMO007177	MT1	10.9394	-1.94053	0.56588	3.4127	0.000643237	0.00320366
PMO007179	CALB2	1.58937	-2.33577	0.731801	3.17482	0.0014993	0.00655803
PMO007185	PLCG2	10.7612	1.53816	0.410552	-3.7103	0.000207011	0.00123441
PMO007186	S38A6	43.8037	-1.89755	0.300073	6.3211	2.59712e-10	5.78369e-09
PMO007187	VA0D1	114.701	-0.65481	0.209735	3.12233	0.00179427	0.00764113
PMO007190	ORC6	3.86275	2.27279	0.551436	-3.90048	9.60011e-05	0.000634503
PMO007196	NCOA3	53.9828	2.25224	0.410231	-5.46597	4.60392e-08	7.25083e-07
PMO007197	SL9A8	31.5115	-1.29803	0.42615	3.04663	0.00231422	0.00943407
PMO007200	CEBPB	773.367	-0.947245	0.348118	2.72061	0.00651617	0.0220905
PMO007201	PTN1	37.8985	-1.16401	0.29964	3.88268	0.000103313	0.000675595
PMO007203	MOCS3	34.8249	-1.28021	0.312063	4.09982	4.13476e-05	0.000309782
PMO007209	F210B	12.0334	1.27401	0.362259	-3.49987	0.000465477	0.00243632
PMO007214	VAPB	56.6683	-0.728465	0.204712	3.55941	0.000371687	0.0020223
PMO007223	OSBL2	147.42	3.20415	0.29743	-10.7303	7.33738e-27	8.94905e-25
PMO007236	UCKL1	210.935	-1.92501	0.262062	7.34503	2.05709e-13	7.41471e-12
PMO007242	HELZ2	146.494	2.16061	0.505258	-4.27688	1.89535e-05	0.000153873
PMO007245	SRXN1	215.734	2.17153	0.464017	-4.68232	2.83647e-06	2.89978e-05
PMO007247	TBC20	311.37	3.07979	0.300759	-10.2287	1.47497e-24	1.36911e-22
PMO007248	HM13	182.883	-0.725037	0.241132	3.00707	0.00263778	0.0105624
PMO007257	FKB1A	38.0234	2.15658	0.306167	-7.01859	2.24112e-12	6.93425e-11
PMO007258	GID8	41.6318	1.09983	0.291146	-3.77195	0.000161976	0.000999491
PMO007260	PCKGC	1843.92	-1.99833	0.531845	3.75221	0.000175283	0.00107087
PMO007264	MARE1	44.4102	1.23164	0.233732	-5.26228	1.42281e-07	1.97929e-06
PMO007267	HCK	3.77651	2.29284	0.584641	-3.7381	0.00018542	0.00112485
PMO007278	PHAR3	28.407	-1.88265	0.472093	3.98599	6.71999e-05	0.000469281
PMO007281	BPI	43.2888	4.85448	0.594542	-7.51357	5.7535e-14	2.21057e-12
PMO007286	EDN3	2.09474	-2.80886	0.652256	4.2479	2.15782e-05	0.000173835
PMO007297	XPO2	176.506	-0.653853	0.207705	3.14831	0.00164215	0.00708247
PMO007299	TIRAP	17.0125	-6.3775	0.568823	10.875	1.51682e-27	1.89404e-25
PMO007300	GPT	75.704	-1.04098	0.336818	3.09174	0.00198986	0.00830878
PMO007301	H2AX	8.56973	-1.32345	0.426237	3.09663	0.00195732	0.00818922
PMO007304	IFT46	17.7644	-1.13375	0.414753	2.73585	0.006222	0.0212582
PMO007306	5HT3A	2.30647	-2.16493	0.574817	3.66089	0.000251343	0.00145253
PMO007307	RBM7	27.9661	0.957536	0.387865	-2.46869	0.0135608	0.0402145
PMO007310	SIDT2	676.188	-1.26286	0.267887	4.71395	2.42957e-06	2.52065e-05
PMO007311	TAGL	76.1376	2.66435	0.322338	-4.31624	1.5871e-05	0.0001316
PMO007324	HINFP	180.67	-0.95712	0.222647	4.29883	1.71704e-05	0.000140704
PMO007335	TM136	26.592	1.92874	0.495264	-3.88916	0.000100591	0.000659436
PMO007336	TM136	1.98204	2.3271	0.658239	-3.45941	0.000541366	0.00276186
PMO007344	THYN1	51.0935	-0.943435	0.289615	3.25801	0.00112197	0.00512586
PMO007347	ATS8	8.832	1.67087	0.565862	-2.91052	0.0036083	0.0136191
PMO007352	DCPS	39.9803	-2.84979	0.281186	10.1037	5.31718e-24	4.72643e-22
PMO007354	FLI1	133.147	1.00933	0.407402	-2.4765	0.0132676	0.0394568
PMO007360	FEZ1	9.83114	2.78986	0.579131	-4.65796	3.19363e-06	3.20862e-05
PMO007361	ZBT44	84.8274	1.24262	0.390559	-3.17824	0.00148173	0.00651103
PMO007365	TBCEL	20.4809	2.05491	0.452078	-4.50205	6.73004e-06	6.12241e-05
PMO007372	TECTA	69.0775	2.62513	0.399001	-6.55179	5.68532e-11	1.39984e-09
PMO007375	ESAM	161.766	2.12291	0.394153	-5.38215	7.35998e-08	1.09813e-06
PMO007376	HYLS1	5.18347	-1.71387	0.554817	3.07632	0.00209571	0.0086885
PMO007378	ORN	130.566	1.45989	0.291062	-5.01471	5.31135e-07	6.45547e-06
PMO007379	CCD84	8.37168	-2.61151	0.534106	4.86379	1.1516e-06	1.28775e-05
PMO007389	ROBO4	96.5372	0.938155	0.342619	-2.7374	0.0061927	0.0211794
PMO007394	TLR7	3.68123	1.48125	0.507756	-2.86686	0.0041457	0.0152442
PMO007400	IF2G	681.02	-1.20332	0.258187	4.66047	3.15494e-06	3.17889e-05
PMO007401	SAT1	265.261	-1.34786	0.263997	5.10544	3.30028e-07	4.2267e-06
PMO007402	PRDX4	61.3744	1.02325	0.392406	-2.60669	0.00914208	0.0290844
PMO007409	U2AFM	20.9934	-1.8988	0.331484	5.72342	1.04403e-08	1.85922e-07
PMO007410	MSPD2	7.41936	2.12858	0.434109	-4.78327	1.72467e-06	1.8497e-05
PMO007420	SYCM	118.547	-0.992086	0.31559	3.14416	0.00166567	0.00716327
PMO007421	PCID2	49.1785	-0.855133	0.318004	2.6896	0.00715371	0.0237905
PMO007423		2.90209	3.20772	0.626184	-3.37915	0.000727113	0.00355889
PMO007424	DCNL2	190.992	1.11495	0.298276	-3.73722	0.000186064	0.0011275
PMO007430	GCC2	64.2573	1.03565	0.42205	-2.45212	0.0142015	0.0416904
PMO007433	NCK2	45.7669	0.661517	0.276435	-2.39203	0.0167556	0.0476804
PMO007441	RL31	894.663	0.805762	0.282678	-2.85053	0.00436459	0.0159125
PMO007442	PDCL3	76.1732	1.66165	0.32718	-5.07734	3.8275e-07	4.83694e-06
PMO007451	GRPR	2.26403	-2.31752	0.674037	3.54155	0.000397777	0.00213525
PMO007460	CO4A1	346.688	3.00739	0.349885	-8.58878	8.7895e-18	4.72785e-16
PMO007461	CLCN4	12.1336	2.53267	0.606756	-4.1131	3.90375e-05	0.000294155
PMO007467	ARHL1	5.42748	3.52876	0.483803	-4.08013	4.501e-05	0.000333148
PMO007470	SHRM2	8.79875	2.08481	0.473553	-4.31623	1.58713e-05	0.0001316
PMO007474	MBTP2	9.63209	1.33689	0.380359	-3.48888	0.000485049	0.00252115
PMO007476	GCP3	29.5805	0.814133	0.303414	-2.68168	0.00732545	0.024254
PMO007481	M4K4	45.9696	1.21203	0.286056	-4.23091	2.32747e-05	0.000186074
PMO007486	SPX2	73.7475	-2.65493	0.288152	9.20186	3.51806e-20	2.25006e-18
PMO007488	NCAM1	25.5833	-1.26306	0.444218	2.84453	0.00444775	0.0161427
PMO007490	C2C2L	17.3185	1.39999	0.530974	-2.61868	0.00882696	0.0282792
PMO007503	APOA1	566.078	-7.42422	0.376096	19.3469	2.16641e-83	3.78725e-80
PMO007504	SIK3	201.533	1.31107	0.286814	-4.56932	4.89307e-06	4.6279e-05
PMO007512	CD3D	1.54287	1.73681	0.713708	-2.44661	0.0144208	0.0422185
PMO007514	BCDO2	27.7534	-1.43446	0.440563	3.25502	0.00113383	0.00517077
PMO007518	HSPB2	55.8917	1.06395	0.34054	-3.12299	0.00179021	0.00763004
PMO007527	SCN3B	1.91639	-2.00739	0.642341	3.10288	0.0019165	0.00805696
PMO007529	GLBL2	55.9025	-1.58383	0.312557	5.06581	4.06675e-07	5.12078e-06
PMO007532	ATS15	5.44974	3.07557	0.60657	-4.72325	2.321e-06	2.41757e-05
PMO007536	RUSD4	33.5133	-1.00083	0.35323	2.83245	0.00461923	0.0165929
PMO007543	APLP2	274.681	0.699252	0.184363	-3.79252	0.000149127	0.000929101
PMO007554	G6PT1	152.984	-0.766463	0.284778	2.69136	0.00711605	0.0237029
PMO007555	ZPR1	205.817	-1.32385	0.316932	4.17654	2.95971e-05	0.000230332
PMO007559	TRI29	1.92416	-2.5254	0.714042	3.52969	0.000416043	0.0022208
PMO007560	UBP2	256.9	-1.0266	0.392743	2.61373	0.008956	0.0286226
PMO007561	BCL9L	415.92	1.265	0.29357	-4.30843	1.64418e-05	0.00013558
PMO007562	DHSDB	529.502	1.21596	0.328845	-3.69791	0.000217384	0.00128676
PMO007563	MUC18	319.876	0.856273	0.268417	-3.18986	0.00142342	0.00628376
PMO007568	PCSK7	173.676	1.82724	0.320042	-5.70721	1.14844e-08	2.02114e-07
PMO007569	UBE4A	412.605	-0.628011	0.263872	2.38002	0.0173119	0.0489315
PMO007574	BUD13	48.3803	1.20872	0.355253	-3.40198	0.000668995	0.00330995
PMO007578	B3GLT	3.21398	2.52012	0.59167	-4.07697	4.56258e-05	0.000335368
PMO007580	PCP	18.2597	0.818986	0.288632	-2.83391	0.0045982	0.0165413
PMO007581	CC90B	19.6286	1.48109	0.341418	-4.31943	1.56434e-05	0.000130025
PMO007584	RFC3	49.6567	-0.697245	0.267565	2.60687	0.00913742	0.0290844
PMO007591		17.944	2.94828	0.437956	-6.59163	4.35012e-11	1.09684e-09
PMO007592	RSLBA	44.89	-3.14474	0.460906	6.78649	1.14897e-11	3.22235e-10
PMO007605	CUL5	619.649	2.89385	0.451951	-6.40907	1.46409e-10	3.36773e-09
PMO007611	CEP57	11.1042	3.24842	0.493409	-6.20334	5.52764e-10	1.18325e-08
PMO007617	CE295	33.9613	1.77899	0.391287	-4.53463	5.77049e-06	5.36108e-05
PMO007629	HIKES	113.799	-0.680039	0.268669	2.53173	0.0113501	0.0347088
PMO007637	PICAL	62.8251	1.31612	0.223519	-5.88173	4.05995e-09	7.7568e-08
PMO007638	RAB30	65.9746	-0.892441	0.349048	2.55654	0.010572	0.0327398
PMO007642	MED17	108.991	-0.755498	0.196376	3.8476	0.000119279	0.000768498
PMO007644	KLOT	2.93041	3.05315	0.688045	-4.43102	9.37904e-06	8.2049e-05
PMO007648	RHG42	6.52381	1.24878	0.455994	-2.70479	0.0068348	0.0229409
PMO007651	PDS5B	93.6678	0.975577	0.390764	-2.49584	0.0125661	0.0377018
PMO007656	TF3A	35.2579	-1.78813	0.277954	6.42938	1.28128e-10	2.97762e-09
PMO007659	ZMYM2	25.4045	1.35533	0.366242	-3.68839	0.00022568	0.00132837
PMO007662	TM135	29.2464	1.46803	0.379943	-3.85392	0.000116244	0.000752643
PMO007668	SULF2	24.9256	1.14196	0.336248	-3.38864	0.000702403	0.00344921
PMO007672	FA65C	318.268	1.84296	0.419807	-4.39113	1.12765e-05	9.67916e-05
PMO007675	ATP9A	11.3002	2.01311	0.479327	-4.1568	3.22737e-05	0.000249278
PMO007685	CATZ	189.674	-1.45885	0.270172	5.3994	6.6863e-08	1.01013e-06
PMO007690	PSA7	882.355	-0.990171	0.307112	3.22388	0.00126466	0.00567852
PMO007693	CABL2	26.9294	1.80216	0.384266	-4.66439	3.09537e-06	3.12787e-05
PMO007695	DIDO1	154.967	1.44978	0.288893	-5.01546	5.29074e-07	6.43788e-06
PMO007699	ACHA4	2.02894	1.73641	0.635442	-2.72981	0.00633718	0.0215884
PMO007701	EF1A2	13333.3	-0.947842	0.332752	2.8482	0.00439679	0.015991
PMO007702	SRMS	2.58995	1.39858	0.555129	-2.46453	0.0137192	0.0405812
PMO007711	TNF6B	7.40865	-1.23898	0.468131	2.64167	0.00824975	0.0268149
PMO007715	SNPH	19.8713	-5.03524	0.440651	10.4532	1.41709e-25	1.54832e-23
PMO007717	F110A	17.1913	-1.32669	0.458777	2.88472	0.00391761	0.0145303
PMO007720	IRF4	6.37355	1.5853	0.480629	-3.25512	0.00113346	0.00517077
PMO007732	PREX1	35.7995	1.25991	0.327502	-3.83832	0.000123876	0.00079519
PMO007735	CK5P1	196.726	-1.09014	0.302581	3.60259	0.000315068	0.00175878
PMO007753	RPGP1	4.54371	1.69889	0.506202	-3.27728	0.00104813	0.00484098
PMO007754	F131B	14.7522	-4.54616	0.483139	8.75063	2.12167e-18	1.19646e-16
PMO007759	DCBD2	6.36074	1.05353	0.433535	-2.41114	0.0159029	0.0456627
PMO007760	TTF2	46.9693	-0.694566	0.318047	3.64599	0.000266359	0.00152752
PMO007765	FA5	38.1248	0.713561	0.465994	-3.03505	0.00240493	0.00975081
PMO007771	K1407	8.74067	-1.77933	0.445132	3.9876	6.67451e-05	0.000467037
PMO007774	LFA3	35.8944	-1.69024	0.438195	3.85169	0.000117304	0.000758574
PMO007778	LRC58	28.2726	1.68674	0.481182	-3.48739	0.000487765	0.0025315
PMO007784	TNR1A	22.5016	0.966932	0.389203	-2.48265	0.013041	0.0389041
PMO007789	DUS12	21.1361	1.28314	0.370372	-3.45851	0.000543165	0.00276835
PMO007792	MA1A2	39.6027	1.35383	0.418245	-3.22884	0.00124292	0.00559264
PMO007800	ACRBP	3.24887	3.61067	0.625395	-5.6725	1.40732e-08	2.43587e-07
PMO007801	PIANP	2.16931	2.52128	0.696382	-3.55101	0.000383759	0.00207594
PMO007804	C1R	13.7895	0.944219	0.360184	-2.61354	0.00896104	0.0286245
PMO007807	PLCX2	4.00437	1.58012	0.584159	-2.6532	0.00797317	0.0260531
PMO007814	MBOA5	95.5927	-1.53181	0.442525	3.45887	0.000542447	0.00276603
PMO007815	MLF2	193.322	-0.983715	0.190483	5.16436	2.4126e-07	3.18712e-06
PMO007819	IGS11	5.47808	2.24326	0.630258	-3.42683	0.00061067	0.00306915
PMO007823	NEPRO	18.1125	0.964211	0.371027	-2.5983	0.00936875	0.0296974
PMO007827	S2533	120.017	1.13179	0.448772	-2.52333	0.0116251	0.0353641
PMO007828	GDAP2	54.9766	-0.717852	0.264922	2.71061	0.00671589	0.0225996
PMO007835	PHLB2	73.6113	1.19958	0.390628	-3.06743	0.00215911	0.00890559
PMO007843	ZN827	16.5444	-1.27705	0.534754	2.38804	0.0169383	0.0480569
PMO007844	APC10	68.1189	-1.41617	0.308073	4.59739	4.27808e-06	4.12055e-05
PMO007849	SCD5	42.695	1.2216	0.269866	-4.52029	6.17549e-06	5.68698e-05
PMO007851	HNRPD	295.531	-1.28876	0.272727	4.72545	2.29604e-06	2.39634e-05
PMO007857	MMRN1	5.64265	-1.93136	0.651395	2.93887	0.00329407	0.0126516
PMO007867	NPNT	4.06823	2.21495	0.606102	-3.49334	0.000477027	0.00248561
PMO007869	CP2U1	15.27	1.22186	0.45155	-2.68966	0.00715255	0.0237905
PMO007870	HCDH	719.843	-0.899075	0.333118	2.6988	0.00695902	0.0232685
PMO007875	LRIT3	2.17167	2.12402	0.679113	-3.0133	0.00258427	0.0103856
PMO007878	AP5S1	11.7124	-1.37492	0.337844	4.06576	4.78769e-05	0.000348737
PMO007890	TIFA	4.10127	1.57744	0.531743	-2.90873	0.00362901	0.0136727
PMO007893	DCTN6	135.675	-3.23914	0.292399	11.0653	1.84945e-28	2.45556e-26
PMO007912	GAR1	19.1509	-2.83195	0.375864	7.49292	6.73596e-14	2.56922e-12
PMO007913	ZN363	44.5118	1.65721	0.402588	-4.11229	3.9175e-05	0.00029498
PMO007915	CENPC	3.45019	-3.52069	0.657971	5.26382	1.4109e-07	1.96533e-06
PMO007916	AIMP1	83.5883	-1.21449	0.296593	4.09535	4.21536e-05	0.000314921
PMO007917	SMRCD	48.8693	1.30083	0.240308	-5.40682	6.41527e-08	9.78049e-07
PMO007920	CG055	12.9199	2.14693	0.401194	-5.28304	1.27058e-07	1.7867e-06
PMO007923	PDIP3	85.4311	0.648853	0.193433	-3.35334	0.000798424	0.00385219
PMO007927	NAGAB	16.6328	1.20276	0.316126	-3.79245	0.000149166	0.000929101
PMO007931	NH2L1	35.0346	-2.58648	0.445641	5.80286	6.51925e-09	1.21242e-07
PMO007933	PHF5A	12.6949	-2.58743	0.568188	4.55501	5.23824e-06	4.91448e-05
PMO007935	F10A1	150.701	-1.23356	0.27491	4.4876	7.20291e-06	6.49624e-05
PMO007936	PM34	7.15385	-1.41609	0.447495	3.16046	0.00157519	0.00681608
PMO007939	CBX6	10.8331	1.14682	0.475071	-2.39322	0.0167014	0.0475519
PMO007943	JOS1	26.7082	2.2037	0.366403	-5.97457	2.30699e-09	4.62676e-08
PMO007945	DDX17	284.512	1.17821	0.359682	-3.2753	0.00105549	0.0048728
PMO007947	T184B	101.376	1.16939	0.375794	-3.10968	0.00187289	0.00791168
PMO007958	EIF3D	1139.76	-1.01553	0.289086	3.51274	0.000443513	0.0023424
PMO007962	MYG	16025.6	1.93546	0.482589	-4.01715	5.8905e-05	0.000418317
PMO007963	RTCB	190.145	-0.983354	0.263399	3.73323	0.000189037	0.00114152
PMO007965	NUAK1	131.72	1.65021	0.505279	-3.26697	0.00108704	0.00499209
PMO007967	PRDM4	35.713	1.03866	0.26277	-3.94977	7.82268e-05	0.000533845
PMO007976	SUN2	59.0661	1.0278	0.408731	-2.51134	0.0120273	0.0364023
PMO007978	CP2D4	201.264	5.71877	0.561085	-9.88336	4.91562e-23	3.9969e-21
PMO007979	RAGP1	109.251	-1.66013	0.213887	7.76024	8.47689e-15	3.5424e-13
PMO007984	CKAP4	24.746	1.73488	0.337143	-5.12179	3.02645e-07	3.91423e-06
PMO007990	PMM1	14.2612	-1.32257	0.471898	2.80497	0.00503218	0.017838
PMO007997	MKL1	66.684	0.731739	0.274848	-2.66114	0.00778767	0.0255745
PMO008001	RAB9B	4.17045	1.46914	0.511624	-2.83531	0.00457814	0.0164904
PMO008003	AGAL	21.9311	-1.38776	0.404126	3.4306	0.000602246	0.00303117
PMO008006	TAF7	75.2399	-4.84176	0.562745	8.45838	2.71118e-17	1.38047e-15
PMO008007	F8I2	101.804	1.49226	0.553561	-2.69998	0.00693446	0.0232011
PMO008008	FUND2	190.071	-2.59115	0.374747	6.91093	4.81501e-12	1.41867e-10
PMO008010	SNX12	181.566	-1.0589	0.272197	3.89037	0.000100093	0.000656653
PMO008011		1.56831	1.70849	0.669533	-2.55269	0.0106894	0.0330328
PMO008012	TEX11	9.80646	3.30702	0.574669	-5.38997	7.04678e-08	1.0544e-06
PMO008019	MTMR1	34.9738	-1.08831	0.345968	3.14598	0.0016553	0.00712453
PMO008023	IRS2A	671.785	1.08643	0.390798	-2.7804	0.00542922	0.0190014
PMO008024	CO4A6	29.1974	2.39663	0.511448	-2.85222	0.0043415	0.0158559
PMO008032	THOC2	153.501	0.9488	0.254954	-3.72111	0.000198346	0.00118883
PMO008033	C1GLC	51.1577	-1.1599	0.252703	4.59012	4.42981e-06	4.24331e-05
PMO008035	LAMP2	18.529	-1.33515	0.347439	3.83798	0.000124049	0.000795808
PMO008055	DKC1	110.682	-1.20521	0.27738	4.34531	1.39077e-05	0.000117929
PMO008057	SESN3	21.0182	-1.136	0.364148	3.11825	0.00181926	0.00773384
PMO008064	NKRF	571.095	-0.822662	0.228006	3.6081	0.000308448	0.00172827
PMO008065	NPAS2	8.01763	1.78169	0.475236	-3.70395	0.000212271	0.00126291
PMO008072	FMR1	58.2196	0.730806	0.217428	-3.35984	0.000779885	0.00378363
PMO008078	WBP2	233.936	2.32683	0.249275	-9.32619	1.09746e-20	7.19453e-19
PMO008084	LMBL2	7.62485	0.955589	0.386317	-2.4667	0.0136364	0.0403818
PMO008085	EP300	678.434	1.02108	0.285389	-3.57768	0.000346663	0.00190474
PMO008087	XPP3	81.6655	-0.703067	0.295601	2.37894	0.0173623	0.0490176
PMO008089	TNR6B	412.243	0.994614	0.239084	-4.15963	3.18762e-05	0.000246571
PMO008093	MID51	68.4388	1.44569	0.507587	-2.84509	0.00443992	0.0161199
PMO008099	RPAB2	141.311	-1.91293	0.307963	6.21009	5.29554e-10	1.14055e-08
PMO008102	H5	3529.13	2.51839	0.388242	-6.49087	8.53402e-11	2.04836e-09
PMO008103	TARA	180.026	2.4113	0.29242	-8.23704	1.7653e-16	8.61218e-15
PMO008105	BORG5	29.313	1.35972	0.441201	-3.07551	0.00210144	0.00870273
PMO008108	RHES	3.67729	1.56597	0.544119	-2.82098	0.00478773	0.017071
PMO008113	TIMP3	57.7986	1.70582	0.345187	-4.93096	8.18283e-07	9.50496e-06
PMO008115	PWP1	45.3635	-0.775418	0.266761	2.90739	0.00364459	0.0137166
PMO008120	RPC2	81.7028	-0.90891	0.285244	3.18711	0.001437	0.00633571
PMO008122	3BP1	4.41692	-1.80021	0.510798	3.49608	0.000472151	0.0024651
PMO008126	SRBP2	105.29	1.29619	0.415904	-3.11431	0.00184374	0.00781057
PMO008127	Z3H7B	113.829	1.76881	0.486387	-3.6352	0.000277762	0.00157996
PMO008128	MILK1	88.5223	0.653486	0.25506	-2.56097	0.0104382	0.0323828
PMO008136	EIF3L	714.2	-1.21181	0.276043	4.38981	1.13449e-05	9.72197e-05
PMO008138	T11L2	85.9795	0.815076	0.3256	-2.50213	0.0123448	0.0371441
PMO008148	ZC21A	2.42271	1.65508	0.601415	-2.66645	0.00766581	0.0252613
PMO008149	RAB2A	803.061	-1.10085	0.299498	3.67538	0.000237499	0.00138473
PMO008152	RM53	123.045	-1.18731	0.231848	5.12096	3.0398e-07	3.92523e-06
PMO008155	TMM70	113.151	-0.788376	0.330023	2.38945	0.0168734	0.0479635
PMO008168	TGS1	36.8813	-0.839527	0.344041	2.44148	0.0146273	0.0426419
PMO008171	S17AA	127.988	1.36198	0.548203	-2.48868	0.012822	0.0383927
PMO008191	CSPP1	21.7051	-1.1299	0.359398	3.14607	0.0016548	0.00712453
PMO008194	MCM4	26.226	1.48149	0.264499	-5.5873	2.30629e-08	3.86433e-07
PMO008195	SGK3	29.0161	1.69667	0.293049	-5.7697	7.94115e-09	1.44609e-07
PMO008198	RDH10	17.1495	1.13133	0.387898	-2.90927	0.00362268	0.0136537
PMO008199	CHCH7	28.5333	-1.82941	0.482118	3.79602	0.000147035	0.000919101
PMO008200	UBX2B	13.3006	1.1787	0.352953	-3.32443	0.000885986	0.00419554
PMO008206	PDPFL	2.14257	1.76286	0.634176	-2.71532	0.00662113	0.0223525
PMO008207	CHD7	564.431	-0.746989	0.312739	2.38851	0.0169168	0.0480348
PMO008208	LYN	39.3197	0.854578	0.352821	-2.41857	0.0155816	0.0449247
PMO008213	HABP4	24.8566	-3.66879	0.418141	8.64395	5.43039e-18	2.96663e-16
PMO008216	AMPO	11.8824	3.03715	0.465343	-6.26413	3.74912e-10	8.2097e-09
PMO008218	RMI1	17.7737	1.21706	0.42871	-2.82892	0.00467051	0.0167369
PMO008220	SERC	3.31689	-1.62114	0.62577	2.57825	0.00993022	0.0311571
PMO008225	ATL1	4.25433	1.50607	0.530241	-2.77859	0.0054596	0.0190822
PMO008232	RCL1	248.975	-1.49047	0.446564	3.33539	0.000851791	0.00405926
PMO008234	KLRG1	2.39694	-2.35497	0.606803	3.76368	0.000167431	0.00102881
PMO008235	BT1A1	48.0702	2.26652	0.437667	-5.16683	2.38097e-07	3.15727e-06
PMO008239	SMCA2	413.13	-0.797109	0.269046	2.96264	0.00305014	0.0118492
PMO008244	DOCK8	6.90624	1.32814	0.453132	-2.89603	0.0037792	0.0141168
PMO008246	RT27	304.723	-1.47366	0.369201	3.99043	6.59525e-05	0.000462108
PMO008250	PAR3	20.1932	-1.15665	0.411714	2.8093	0.00496493	0.0176413
PMO008254	JAK2	164.024	1.51053	0.475645	-3.1759	0.0014937	0.00654172
PMO008260	SNPC3	33.637	-4.60092	0.434618	10.28	8.66932e-25	8.34243e-23
PMO008262	CATL1	6872.76	-2.95853	0.435032	6.7952	1.08161e-11	3.04974e-10
PMO008264	UHRF2	70.1883	1.58174	0.428183	-3.69313	0.000221514	0.00130752
PMO008268	AP3B1	148.147	-1.13277	0.31336	3.61467	0.000300735	0.00169228
PMO008270		1.00917	1.70087	0.713335	-2.38841	0.0169214	0.0480349
PMO008271	POC5	6.03812	-2.53262	0.542982	4.5847	4.54639e-06	4.33458e-05
PMO008293	CNIH4	37.3824	-0.94021	0.337433	2.7858	0.00533959	0.0187502
PMO008305	TRBM	415.323	1.41233	0.459974	-3.07208	0.0021257	0.00878505
PMO008310	BUB1	9.3916	-2.47472	0.539518	4.54673	5.44861e-06	5.10272e-05
PMO008315	TCPD	1105.1	-1.14937	0.266213	4.31735	1.5791e-05	0.000131142
PMO008316	LRRN4	23.1375	-0.885771	0.324559	2.72727	0.00638604	0.0217474
PMO008320	PSN2	58.349	-0.725642	0.25555	2.83999	0.00451145	0.0163062
PMO008326	TCPB	77.9901	1.01567	0.266576	-3.80749	0.000140384	0.000880728
PMO008329	PUS10	7.31951	1.23238	0.408767	-2.98843	0.00280415	0.0110589
PMO008332	TMX4	19.4272	1.32751	0.312885	-4.22504	2.38898e-05	0.000190121
PMO008333	F161A	17.2067	3.60015	0.448137	-7.60709	2.80337e-14	1.12231e-12
PMO008338	CAN1	1.45433	1.896	0.734737	-2.61845	0.00883295	0.0282897
PMO008341	NDUF5	145.274	-0.908773	0.268058	3.39036	0.000698012	0.00343507
PMO008355	EHD3	420.147	0.636382	0.247391	-2.57234	0.0101013	0.0315429
PMO008362	KI16B	97.6142	-0.929481	0.304768	3.04943	0.00229274	0.0093574
PMO008364	FLRT3	81.9217	0.822628	0.339583	-2.42221	0.0154265	0.0445139
PMO008369	SSR4	5.06698	1.55367	0.553264	-2.76145	0.00575446	0.0199113
PMO008373	NPHP1	2.10631	-2.28932	0.637038	3.54619	0.00039084	0.00210664
PMO008374	MALL	1.77537	-1.8393	0.61899	2.90789	0.00363879	0.0137017
PMO008379	REL	3.39768	-1.79139	0.610696	2.89065	0.0038445	0.0143047
PMO008393	PLCB4	44.2499	1.0025	0.410318	-2.43964	0.0147019	0.0428119
PMO008395	PEX13	79.8008	-0.707855	0.282202	2.50882	0.0121133	0.0366053
PMO008396	CC85A	15.062	1.03245	0.322301	-3.19255	0.00141022	0.006236
PMO008397	RS27A	652.047	-4.82163	0.330112	14.5793	3.80441e-48	1.90021e-45
PMO008399	ACYP2	24.5717	-2.22669	0.365664	6.07736	1.22178e-09	2.53266e-08
PMO008400	TLR21	44.6717	4.81791	0.380585	-11.8109	3.42715e-32	5.44657e-30
PMO008404	IP3KB	102.371	1.87477	0.257274	-7.277	3.41326e-13	1.19339e-11
PMO008409	CSCL1	62.6009	-1.22103	0.259198	4.7103	2.47347e-06	2.55357e-05
PMO008410	WDR26	281.544	-1.13003	0.22802	4.95565	7.20873e-07	8.47672e-06
PMO008418	GTSE1	15.7298	2.11629	0.395932	-5.29539	1.18762e-07	1.68557e-06
PMO008435	ANR26	28.8981	0.910029	0.354578	-2.56441	0.0103352	0.032149
PMO008439	PPR3A	659.404	1.37724	0.535301	-2.57766	0.00994726	0.0311588
PMO008443	THAP5	89.4609	2.25708	0.338485	-6.65641	2.80598e-11	7.3143e-10
PMO008444	NRCAM	1.37989	1.7841	0.684615	-2.60261	0.00925158	0.0293704
PMO008454	TB22A	51.5426	1.6543	0.407763	-4.0504	5.11299e-05	0.000370118
PMO008466	PLPL8	2043.33	-1.02372	0.333044	3.0735	0.00211561	0.0087537
PMO008468	ARID2	58.1178	1.3096	0.35809	-3.65137	0.000260844	0.00150247
PMO008469	IQUB	19.3838	5.29907	0.590758	-8.28352	1.19585e-16	5.88888e-15
PMO008470	DOCK4	9.99641	1.38359	0.431176	-3.17756	0.00148521	0.00651271
PMO008474	CAPS2	18.8548	1.68553	0.344791	-4.85934	1.17779e-06	1.31145e-05
PMO008480	IMP2L	30.1107	-0.8296	0.302119	2.7475	0.00600508	0.020638
PMO008483	CSTN1	150.587	1.59653	0.370867	-4.30178	1.69433e-05	0.00013906
PMO008486	SAM11	11.5383	1.55432	0.404246	-3.82191	0.00013242	0.000839757
PMO008493	PUSL1	7.42979	-4.0831	0.5532	6.80547	1.00721e-11	2.86304e-10
PMO008494	CPTP	2.7842	-1.5038	0.588475	2.53357	0.0112907	0.0345777
PMO008499		56.9193	-1.47999	0.332075	4.45555	8.36792e-06	7.41937e-05
PMO008500	RER1	49.5616	-0.85625	0.271267	3.15745	0.00159156	0.00688121
PMO008504	PRD16	7.55624	1.72292	0.432082	-3.92121	8.8104e-05	0.000589413
PMO008506	TPRGL	85.3148	1.71241	0.220223	-7.76685	8.04598e-15	3.37577e-13
PMO008513	TS1R1	28.3725	0.847999	0.347758	-2.43426	0.0149224	0.0433697
PMO008520	KPCZ	33.5294	1.76083	0.324954	-5.40139	6.61248e-08	1.00229e-06
PMO008525	DFFB	7.74492	-1.1845	0.387531	3.05444	0.00225479	0.00922405
PMO008529	ATD3A	354.481	-1.26041	0.30345	4.15347	3.27474e-05	0.000252405
PMO008530	RERE	323.213	1.34696	0.342686	-3.92996	8.49607e-05	0.000572352
PMO008531	DFFA	76.3917	0.840142	0.280368	-2.99594	0.00273604	0.01085
PMO008532	GP157	231.534	1.4653	0.330042	-4.43947	9.01802e-06	7.92876e-05
PMO008535	GBRD	0.69859	-1.96117	0.729063	2.67289	0.0075202	0.0248204
PMO008538	PKHN1	2.36008	-2.87213	0.674737	4.15711	3.22298e-05	0.000249122
PMO008545	PLIN3	490.603	-1.66153	0.453404	3.66187	0.000250377	0.00144978
PMO008552	CHERP	232.698	-1.18112	0.163282	7.2335	4.70686e-13	1.61341e-11
PMO008553	BABA1	48.6195	-2.60192	0.252749	10.2764	9.00203e-25	8.58385e-23
PMO008559	GBG7	0.987891	1.89017	0.717483	-2.63982	0.00829495	0.0269201
PMO008562	PCSK4	13.7794	1.50067	0.496237	-3.00854	0.00262507	0.0105254
PMO008563	RS15	1166.84	2.8122	0.337701	-8.3283	8.20127e-17	4.07692e-15
PMO008564	DAZP1	208.896	-2.16786	0.23355	9.27947	1.70327e-20	1.10281e-18
PMO008574	FSTL3	33.3109	1.14774	0.316008	-3.62603	0.000287815	0.00162831
PMO008575	HCN2	201.909	1.1494	0.445187	-2.58284	0.00979916	0.0308104
PMO008576	BASI	1082.75	0.986681	0.216169	-4.5644	5.00922e-06	4.71226e-05
PMO008577	UB2R1	353.414	-0.882713	0.190826	4.62579	3.7317e-06	3.65811e-05
PMO008579	MADCA	3.11627	2.9206	0.650212	-4.28564	1.82216e-05	0.00014839
PMO008583	HIAT1	138.648	0.734017	0.254329	-2.88527	0.00391083	0.0145103
PMO008585	PALM	55.4117	0.970975	0.354016	-2.74153	0.00611539	0.0209691
PMO008590	HMHA1	22.9204	1.72386	0.458308	-3.74166	0.00018281	0.00111094
PMO008592	PTBP1	72.2831	0.966784	0.317412	-3.04341	0.00233916	0.00952462
PMO008605	ATP7A	127.802	1.23046	0.516299	-2.38382	0.0171338	0.0485066
PMO008606	FGF16	29.8139	-1.44927	0.483451	2.99522	0.00274246	0.0108714
PMO008607	UPP	155.13	-4.78694	0.378634	12.5656	3.26406e-36	6.84734e-34
PMO008608	FIP1	43.2982	1.02531	0.399695	-2.56166	0.0104172	0.0323463
PMO008610		74.2072	1.26933	0.38731	-3.27341	0.00106259	0.00489698
PMO008612	ASB12	419.219	-1.19864	0.388388	3.08528	0.00203359	0.00846107
PMO008621	RB33A	36.6356	-4.02161	0.410498	9.6672	4.15593e-22	3.06983e-20
PMO008625	SASH3	9.86377	2.23653	0.554325	-3.97146	7.14339e-05	0.00049197
PMO008631	DGKH	19.5142	2.64804	0.578262	-4.53552	5.74609e-06	5.34789e-05
PMO008632	SHRM4	573.17	1.86933	0.476596	-3.9269	8.60477e-05	0.00057819
PMO008639	VAMP7	49.1717	-0.818851	0.282415	2.89989	0.00373293	0.0139739
PMO008642	VGFR4	1017.19	1.46004	0.544811	-2.68579	0.00723592	0.024003
PMO008646	AMOT	72.4182	0.625557	0.245112	-2.55199	0.0107111	0.0330825
PMO008652	ARHG9	66.4304	1.24694	0.360016	-3.46175	0.000536675	0.00273926
PMO008654	MOT8	5.22403	-1.18212	0.458968	2.56735	0.010248	0.0319515
PMO008656	KIT	7.18598	2.05011	0.471882	-4.24692	2.16727e-05	0.000174463
PMO008659	UBE2K	20.0399	2.34524	0.369938	-6.27965	3.39337e-10	7.49328e-09
PMO008662	KLF3	46.3401	2.11119	0.287598	-7.3197	2.48521e-13	8.85655e-12
PMO008673	PORED	4.99765	1.3635	0.503006	-2.68961	0.00715363	0.0237905
PMO008675	K1456	9.26686	-1.83153	0.395075	4.62339	3.77527e-06	3.69737e-05
PMO008680	CD38	9.51821	1.9212	0.535581	-3.54292	0.000395717	0.00212637
PMO008683	CND3	13.1336	-3.25248	0.422486	7.56269	3.94831e-14	1.55108e-12
PMO008686	MED28	110.247	0.695169	0.234402	-2.96517	0.00302519	0.0117697
PMO008688	RSLBB	1.85753	-2.22189	0.733064	3.00642	0.00264342	0.0105747
PMO008692	GUF1	99.2397	2.04976	0.318013	-6.43785	1.21174e-10	2.84339e-09
PMO008696	C2D2A	30.6515	-0.884822	0.292738	3.02207	0.0025105	0.010128
PMO008700	EXOC1	109.273	-1.25112	0.192884	6.48636	8.79368e-11	2.10586e-09
PMO008701	PG2IP	11.9442	4.43578	0.570363	-7.03665	1.96918e-12	6.18404e-11
PMO008708	N4BP2	68.8592	1.14554	0.364009	-3.14373	0.0016681	0.00717077
PMO008718	TUSC3	2.50559	-2.12262	0.59803	3.47609	0.000508782	0.00262113
PMO008725	TYW2	34.5968	-1.60484	0.438755	3.65184	0.00026037	0.00150056
PMO008727	TSN6	33.734	-2.20337	0.443925	4.95507	7.23037e-07	8.48983e-06
PMO008729	RAE2	81.2436	1.3608	0.2953	-4.60451	4.13435e-06	4.01902e-05
PMO008735	CHM1B	12.8072	-2.17815	0.439783	4.94385	7.65966e-07	8.94679e-06
PMO008738	PDZ11	21.2198	-0.793477	0.300952	2.63602	0.0083884	0.0271608
PMO008742	EFNB1	111.492	0.95862	0.321447	-2.98055	0.00287729	0.0112864
PMO008745	RHG20	60.9349	0.971376	0.367243	-2.64264	0.00822623	0.026755
PMO008747	ZC4H2	8.05029	1.40214	0.474427	-2.94586	0.00322062	0.0124218
PMO008748	MAP7	67.1801	1.36861	0.327084	-4.18092	2.90331e-05	0.000226415
PMO008749	MMGT1	17.7026	-3.64317	0.376704	9.47091	2.77421e-21	1.88953e-19
PMO008750	MSPD1	203.55	-2.1697	0.314875	6.8878	5.66601e-12	1.66008e-10
PMO008751	F122A	15.1297	-1.35636	0.383724	3.5394	0.000401034	0.00214944
PMO008763	FND3A	86.2618	1.02675	0.400045	-2.56466	0.0103277	0.0321483
PMO008768	CCND3	38.9101	1.16613	0.463736	-2.51117	0.0120333	0.0364054
PMO008769	MED20	91.5515	-1.73491	0.280889	6.17432	6.64484e-10	1.41089e-08
PMO008775	OARD1	244.169	-0.627635	0.240697	2.60755	0.00911918	0.0290468
PMO008779	URFB1	192.963	0.793578	0.226543	-3.50231	0.00046124	0.00242019
PMO008780	ANS1A	98.5892	1.39241	0.512442	-2.71742	0.00657921	0.0222467
PMO008782	ZNF76	29.2752	-1.57621	0.324746	4.85157	1.22489e-06	1.35526e-05
PMO008785	FANCE	10.3309	2.03224	0.420272	-4.76555	1.88338e-06	2.00353e-05
PMO008787	MICA1	23.1368	1.45008	0.411058	-3.51793	0.00043492	0.00230398
PMO008793	CR1	119.097	7.32503	0.457326	-12.6324	1.40003e-36	3.05935e-34
PMO008796	DHI1	3.0655	-2.33985	0.66886	3.418	0.000630828	0.00314776
PMO008800	AT5F1	1381.11	3.46806	0.37288	-9.30537	1.33529e-20	8.69931e-19
PMO008801	RAP1A	166.662	2.426	0.306109	-7.91816	2.41043e-15	1.07131e-13
PMO008802	DDX20	91.4846	-0.894804	0.262726	3.40589	0.000659486	0.00327371
PMO008804	WNT2B	3.61392	-1.32445	0.535286	2.45553	0.0140675	0.0413317
PMO008806	SDE3	24.6377	1.50141	0.456488	-3.28258	0.00102861	0.00476549
PMO008808	LRIG2	70.2848	1.55285	0.393215	-3.94268	8.05751e-05	0.000546329
PMO008810	BRPF3	98.2951	0.942772	0.31783	-2.96475	0.00302932	0.0117771
PMO008815	HIPK1	368.102	1.30269	0.481439	-2.70742	0.00678093	0.0227965
PMO008817	PPARD	413.768	-0.676919	0.273152	2.47805	0.0132104	0.0393201
PMO008820	UBP49	5.43679	1.37816	0.479965	-2.82999	0.0046549	0.0166867
PMO008825	SUCHY	1.575	2.32401	0.673613	-3.41858	0.000629489	0.00314415
PMO008839	SFRP4	23.2678	-1.89656	0.438019	4.32112	1.55242e-05	0.000129541
PMO008851	ZDHC3	16.8206	-1.46198	0.299087	4.88683	1.02471e-06	1.1582e-05
PMO008857	LRRF2	91.3344	1.0559	0.303452	-3.47875	0.000503749	0.00260169
PMO008859	CDK13	288.804	0.850627	0.337688	-2.51853	0.0117845	0.0357764
PMO008862	YAED1	10.3865	0.905559	0.351816	-2.56531	0.0103083	0.0321077
PMO008867	CUL1	194.97	-0.62207	0.260479	2.38831	0.0169262	0.0480355
PMO008868	GNDS	99.2024	1.14448	0.316858	-3.60947	0.000306828	0.00172102
PMO008873	FA69B	13.4453	2.29186	0.417525	-5.41277	6.2058e-08	9.51646e-07
PMO008875	MPPA	342.229	-1.0571	0.264164	4.00151	6.29405e-05	0.000443076
PMO008877	KCNT1	5.84416	2.96816	0.586609	-4.71264	2.44528e-06	2.53444e-05
PMO008879	PHF19	92.6817	-3.78845	0.444723	8.47506	2.34958e-17	1.20807e-15
PMO008881	RAB14	115.612	-1.49791	0.325848	4.59713	4.28354e-06	4.12203e-05
PMO008882	STOM	8.16952	-1.11137	0.400676	2.77874	0.00545702	0.0190796
PMO008885	RBM18	88.485	-0.851984	0.251292	3.39135	0.00069548	0.00342483
PMO008888	STRBP	108.442	-1.05106	0.302382	3.47658	0.000507858	0.00261765
PMO008890	PSB7	1805.75	-1.44529	0.326613	4.42439	9.67149e-06	8.43261e-05
PMO008893	RL35	627.383	-3.96803	0.383397	10.3405	4.62106e-25	4.68229e-23
PMO008894	PPP6	155.282	-1.17044	0.275605	4.24651	2.17126e-05	0.00017465
PMO008896	SIN1	76.842	-1.62622	0.281775	5.77165	7.84978e-09	1.43194e-07
PMO008898	GARL3	23.3809	2.2514	0.404308	-3.81371	0.000136897	0.000862413
PMO008899	FBXW2	47.1953	-0.777201	0.208102	3.73501	0.000187711	0.00113481
PMO008902	TRAF1	8.75982	-2.81526	0.533199	5.20433	1.947e-07	2.63171e-06
PMO008904	SARDH	2.93831	2.70849	0.607843	-4.23275	2.30851e-05	0.00018484
PMO008905	CI116	9.57183	-2.58615	0.517082	4.97512	6.52074e-07	7.75465e-06
PMO008906	NDUA8	1406.95	-0.783487	0.293964	2.66509	0.00769676	0.0253314
PMO008908	SURF1	83.1009	-1.40851	0.304853	4.6206	3.82625e-06	3.7438e-05
PMO008912	ARP5L	43.0395	-3.34078	0.347421	9.57866	9.83105e-22	6.92066e-20
PMO008917	ASB10	131.746	1.21134	0.495995	-2.44471	0.0144968	0.0423793
PMO008919	TMUB1	127.892	1.53214	0.437725	-3.50062	0.000464178	0.00243236
PMO008920	CDK5	20.6069	-2.72664	0.474457	5.712	1.11659e-08	1.97503e-07
PMO008924	RARR2	30.5716	-2.68303	0.481412	5.54596	2.92348e-08	4.81387e-07
PMO008927	TBRG4	1074.42	-1.15822	0.27771	4.17029	3.04209e-05	0.000235834
PMO008928	NACAD	6.12152	-1.83355	0.561228	3.24875	0.00115914	0.00527242
PMO008929	PTN23	264.749	-0.804131	0.335318	2.39783	0.0164926	0.0470596
PMO008930	DHX36	233.418	-1.37191	0.206123	6.65539	2.82551e-11	7.33584e-10
PMO008939	SETD2	391.077	0.607853	0.250736	-2.42404	0.0153489	0.0443511
PMO008940	CCD12	6.92447	3.08909	0.518064	-5.49385	3.93271e-08	6.33643e-07
PMO008957	ABCF2	800.866	-1.41197	0.263884	5.35047	8.77245e-08	1.28153e-06
PMO008959	CRYD	3.99558	-3.13277	0.54153	5.47556	4.36122e-08	6.92055e-07
PMO008960	SNP47	31.3718	-4.02316	0.339652	11.6509	2.2709e-31	3.35485e-29
PMO008961	FASTK	550.59	-0.854735	0.231083	3.69879	0.000216631	0.00128303
PMO008962	WBP4	89.3739	1.96119	0.298644	-6.56099	5.34513e-11	1.32541e-09
PMO008963	GPAM1	54.9504	-1.44845	0.311455	4.65165	3.29289e-06	3.28944e-05
PMO008967	AKA11	48.9282	3.02952	0.328048	-9.14917	5.73705e-20	3.60335e-18
PMO008968	COG3	35.3558	1.13605	0.319424	-3.54888	0.00038687	0.00208843
PMO008970	NUD15	20.4972	4.29876	0.5129	-7.60398	2.87154e-14	1.14523e-12
[truncated: 1,688 more rows]

## Sheet: Pa.mo(L) VS. On.ta
Gene_id	Gene_name	baseMean	log2FoldChange	lfcSE	stat	pvalue	padj
PMO000001	NDUB6	244.553	1.65027	0.361241	-4.56793	4.93e-06	4.58e-05
PMO000010	ACPM	118.22	-6.10847	0.444005	13.3166	1.85e-40	7.8e-38
PMO000013	RHG17	110.159	0.638585	0.237596	-2.68741	0.00720092	0.0224474
PMO000014	ZDHC4	7.4133	-1.26803	0.518303	2.44943	0.0143082	0.0392849
PMO000019	CSKI1	1.81397	1.69312	0.677057	-2.40173	0.0163177	0.0436077
PMO000022	MSB1A	5.0192	3.82441	0.628192	-5.85997	4.63e-09	8.39e-08
PMO000031	CAC1H	26.8174	1.57594	0.456769	-3.43689	0.000588444	0.00284017
PMO000047	KCJ12	23.4415	2.89167	0.570441	-4.99188	5.98e-07	6.98e-06
PMO000053	FXL18	61.0219	-0.739018	0.309624	2.38723	0.0169757	0.0448654
PMO000056	RADIL	15.0926	1.15099	0.393618	-2.91563	0.00354971	0.0126292
PMO000060	IQCE	6.81894	-1.17576	0.453914	2.58907	0.00962365	0.0284652
PMO000070	BI2L1	23.7367	0.97204	0.369253	-2.63056	0.00852433	0.0257959
PMO000080	GDE1	21.9392	-1.12383	0.292157	3.84686	0.000119643	0.000741971
PMO000081	TMC7	22.769	1.38713	0.463361	-2.98521	0.00283388	0.010498
PMO000087	RS15A	508.702	-0.744318	0.290664	2.56075	0.0104445	0.0303926
PMO000091	SNX29	38.4801	-1.14076	0.423352	2.69284	0.0070847	0.0221376
PMO000094	XPF	20.0863	1.33936	0.352919	-3.78491	0.000153765	0.000920492
PMO000102	CHSP1	30.0416	0.998587	0.395534	-2.52177	0.0116765	0.0333651
PMO000107	HBAD	4485.14	2.11913	0.469296	-4.5217	6.13e-06	5.58e-05
PMO000108	TMM8A	73.6363	1.96694	0.236538	-8.30142	1.03e-16	5.73e-15
PMO000112	CG026	58.3672	-0.769506	0.239159	3.21809	0.00129046	0.00547835
PMO000114	UBAD1	374.721	-1.24651	0.305538	4.07937	4.52e-05	0.000319169
PMO000122	DECR2	77.8235	-0.793697	0.249095	3.18591	0.00144297	0.00598812
PMO000123	RFIP3	54.3007	1.34203	0.406019	-3.30291	0.000956881	0.00424009
PMO000124	MYADM	3.49972	1.84356	0.621966	-2.88519	0.00391171	0.0136858
PMO000125	PITC1	95.5566	2.05733	0.449432	-4.57374	4.79e-06	4.47e-05
PMO000129	RHBL1	276.596	5.05512	0.34881	-14.335	1.32e-46	9.28e-44
PMO000133	F173A	180.897	1.43195	0.371719	-3.85235	0.000116991	0.000728096
PMO000138	S14L5	69.6145	1.85899	0.386364	-4.8014	1.58e-06	1.65e-05
PMO000140	ANKF1	24.7828	2.15997	0.395446	-5.42406	5.83e-08	8.46e-07
PMO000143	NOGG2	11.2235	1.47908	0.627927	-2.34486	0.0190342	0.0492298
PMO000144	TBC24	15.1795	1.0745	0.343425	-3.11736	0.00182477	0.00723038
PMO000145	VATL	147.186	-0.856658	0.214998	3.9849	6.75e-05	0.000453389
PMO000151	TM204	39.8693	1.52829	0.427503	-3.56772	0.000360106	0.00188921
PMO000154	KAP1	23.6593	0.736195	0.283661	-2.59322	0.00950811	0.0281948
PMO000155	TV23A	8.67721	1.49318	0.462662	-3.19908	0.00137867	0.00578052
PMO000158	MD1L1	34.3795	0.598145	0.226274	-2.64315	0.00821395	0.0250416
PMO000160	TCPR1	86.0116	1.05661	0.381995	-2.76396	0.00571037	0.0186344
PMO000172	MYH11	389.085	1.69862	0.384396	-4.41947	9.89e-06	8.52e-05
PMO000173	RS2	2201.19	-1.05051	0.373231	2.81416	0.00489048	0.016417
PMO000176	ZFN2B	570.142	-0.991373	0.396023	2.5028	0.0123214	0.0348379
PMO000178	MILK2	27.0792	1.57159	0.414826	-3.77517	0.000159898	0.000949641
PMO000181	RN216	28.492	1.84384	0.431611	-4.24885	2.15e-05	0.00016763
PMO000187	SNR25	75.819	2.1782	0.339329	-6.41106	1.45e-10	3.43e-09
PMO000191	CTF18	24.602	1.23511	0.417633	-2.95322	0.00314474	0.0113964
PMO000192	TELO2	34.1101	1.02693	0.327696	-3.12901	0.00175394	0.00702377
PMO000197	RB40C	28.6064	1.30361	0.387941	-3.35306	0.000799244	0.00363966
PMO000202	GPC5B	62.3415	1.52964	0.581513	-2.633	0.00846335	0.0256755
PMO000211	HBA	12124.3	2.50854	0.427513	-5.8738	4.26e-09	7.78e-08
PMO000217	TMM11	54.6875	-0.749628	0.249183	3.00827	0.00262739	0.0098682
PMO000222	NHRF2	555.864	1.65102	0.393867	-4.19273	2.76e-05	0.000207926
PMO000226	IL4RA	544.232	-2.07831	0.300248	6.92098	4.49e-12	1.35e-10
PMO000229	COG7	194.54	-1.17666	0.307708	3.8239	0.000131359	0.000805138
PMO000230	SYEM	32.871	-0.769748	0.30801	2.49888	0.0124588	0.0351141
PMO000231	PLK1	3.27622	2.21913	0.666578	-3.20405	0.0013551	0.00569989
PMO000233	TNR6A	124.488	1.66196	0.339236	-4.89483	9.84e-07	1.09e-05
PMO000235	LCMT1	45.2128	-1.95429	0.350334	5.57685	2.45e-08	3.89e-07
PMO000238	LST8	75.852	-1.74148	0.346742	5.01931	5.19e-07	6.17e-06
PMO000239	TRAF7	49.8609	-0.715853	0.269938	2.65225	0.0079958	0.0245043
PMO000241	TBL3	58.2518	-0.906861	0.360826	2.51379	0.011944	0.0340186
PMO000256	MYO15	1.83038	2.13627	0.749485	-2.90108	0.00371874	0.0131241
PMO000262	MPRIP	432.582	0.790009	0.307904	-2.56564	0.0102985	0.0300391
PMO000265	BUD31	99.396	-0.890194	0.27014	3.29579	0.000981448	0.00433777
PMO000269	S29A4	2.30057	1.84892	0.658989	-2.7242	0.00644578	0.0205127
PMO000270	WIPI2	382.793	-2.08802	0.335171	6.22828	4.72e-10	1.02e-08
PMO000272	SDK1	47.2083	1.20258	0.461087	-2.60389	0.00921729	0.0274795
PMO000276	EIF3B	417.85	-0.806131	0.302873	2.6616	0.00777697	0.0239452
PMO000277	8ODP	4.27867	2.22312	0.593671	-3.60902	0.000307351	0.0016579
PMO000284	BHA15	2.95232	1.58586	0.559508	-2.75259	0.00591255	0.0191398
PMO000287	PMS2	56.439	-1.13923	0.255428	4.46014	8.19e-06	7.19e-05
PMO000289	ERD22	49.8803	-0.613418	0.242809	2.52706	0.0115021	0.0329921
PMO000295	ACSM3	46.0729	-3.0798	0.391964	7.82905	4.92e-15	2.28e-13
PMO000299	MRP1	187.142	0.814743	0.288635	-2.8222	0.00476962	0.0161066
PMO000300	NDE1	50.6929	1.29318	0.29261	-4.4145	1.01e-05	8.66e-05
PMO000301	NTAN1	181.516	-0.811218	0.294634	2.7535	0.00589623	0.0191047
PMO000304	RL1D1	133.067	-1.29933	0.343571	3.78187	0.000155655	0.000930215
PMO000305	CPPED	63.9408	-1.28003	0.246757	5.18742	2.13e-07	2.76e-06
PMO000307	SNN	5.39371	1.82413	0.574532	-3.12792	0.00176051	0.007034
PMO000319	CLCN7	173.57	-0.846266	0.245337	3.44947	0.000561678	0.00272778
PMO000322	MGRN1	67.3654	-0.996253	0.279751	3.56167	0.000368497	0.0019202
PMO000323	HMOX2	494.255	-1.84994	0.257251	7.19048	6.46e-13	2.23e-11
PMO000326	TFAP4	51.632	-1.18073	0.27038	4.36627	1.26e-05	0.000105731
PMO000330	CLUA1	19.3517	-1.73436	0.405397	4.27577	1.9e-05	0.000150383
PMO000331	SBK1	19.445	0.989478	0.409608	-2.40989	0.0159573	0.0428514
PMO000335	PEPL	59.7295	1.1815	0.384633	-3.06903	0.00214757	0.00829701
PMO000337	EF2KT	20.1263	0.994011	0.364539	-2.72668	0.0063976	0.020384
PMO000338		18.8169	1.6755	0.400959	-4.16722	3.08e-05	0.000229001
PMO000345	ARC1B	327.434	1.59815	0.43261	-3.69554	0.000219422	0.00124151
PMO000348	GP146	66.0714	-1.89545	0.348354	5.43706	5.42e-08	7.92e-07
PMO000349	E2AK1	61.5313	-2.07202	0.364016	5.69009	1.27e-08	2.11e-07
PMO000350	RPC5	102.721	-1.21864	0.354426	3.43867	0.000584576	0.00282465
PMO000352	T159A	28.6025	-1.24499	0.319346	3.90013	9.61e-05	0.000612821
PMO000353	GNPTG	28.0419	-1.74346	0.338622	5.14634	2.66e-07	3.36e-06
PMO000354	ELFN1	3.447	2.18549	0.570046	-3.62592	0.000287931	0.00156437
PMO000356	CP013	2.42822	-2.5124	0.620842	3.88912	0.000100607	0.000637058
PMO000359		47.2851	-1.72344	0.402246	4.28132	1.86e-05	0.000147011
PMO000360	MET22	25.2719	-1.99454	0.383721	5.19205	2.08e-07	2.7e-06
PMO000362	CP062	52.443	-1.46808	0.254626	5.7649	8.17e-09	1.4e-07
PMO000364	NDUBA	743.02	0.774986	0.310384	-2.49705	0.0125232	0.035239
PMO000369	GET4	169.28	-0.646983	0.264003	2.45079	0.0142542	0.0391776
PMO000374	IF140	14.7672	-1.01162	0.362454	2.78899	0.0052872	0.0174976
PMO000376	XYLT1	8.48746	1.71443	0.520331	-3.24237	0.00118539	0.00510545
PMO000381	GID4	31.6595	-1.22889	0.300133	4.09406	4.24e-05	0.000301215
PMO000383	ERF3A	400.86	-2.13882	0.271124	7.88758	3.08e-15	1.44e-13
PMO000395	BRAT1	80.9633	-0.99131	0.305381	3.24642	0.00116866	0.00504884
PMO000396	KDM8	28.6857	1.15768	0.339058	-3.40862	0.000652917	0.00309749
PMO000408	PMM2	38.625	-1.02004	0.346993	2.94097	0.00327184	0.0117598
PMO000410	K0556	8.44448	1.63264	0.466196	-3.46579	0.000528674	0.00260111
PMO000419	MYRIP	12.858	2.56888	0.463475	-5.41839	6.01e-08	8.71e-07
PMO000426	FYCO1	1546.98	1.21336	0.437096	-2.7772	0.00548297	0.0179647
PMO000428	CDV3	43.1267	4.27141	0.437007	-9.42483	4.31e-21	3.69e-19
PMO000432	METL6	40.9	-2.27999	0.340101	6.69511	2.16e-11	5.85e-10
PMO000435	CNO10	98.4131	-1.57946	0.317631	4.97244	6.61e-07	7.64e-06
PMO000441	LRC3B	12.6459	2.39342	0.512722	-4.60882	4.05e-06	3.85e-05
PMO000453	NF2L3	7.85875	1.44969	0.500376	-2.86968	0.00410888	0.0142665
PMO000454	NPY	7.44378	2.3387	0.753688	-3.53677	0.000405057	0.00208349
PMO000459	MDR1	4.89205	2.61971	0.575645	-4.28218	1.85e-05	0.000146551
PMO000462	ARL4A	58.9301	0.946917	0.378029	-2.50435	0.0122678	0.0347246
PMO000463	ADSV	4.51764	-1.48302	0.498652	2.95947	0.0030817	0.0112337
PMO000469	MIO	115.007	-1.19748	0.26095	4.58886	4.46e-06	4.2e-05
PMO000473	ASB4	178.767	1.21513	0.409141	-2.97013	0.00297677	0.0109041
PMO000476	CLD12	20.7796	1.38127	0.401663	-3.42499	0.000614814	0.00294105
PMO000479	F1711	13.0905	1.52639	0.403278	-3.75684	0.000172075	0.00100774
PMO000483	HACD1	14.0239	-1.11695	0.442753	2.52428	0.0115934	0.0331726
PMO000497	DNJB6	302.151	-0.874038	0.274377	3.18542	0.00144542	0.00599389
PMO000499	HME2	1.49806	-2.18361	0.685986	3.10559	0.00189901	0.00748507
PMO000509	OCTC	62.0839	-0.982167	0.32403	3.03128	0.00243516	0.0092385
PMO000513	AHR	14.9743	1.91587	0.485882	-3.90374	9.47e-05	0.000604868
PMO000522	SNX10	27.9908	-2.23661	0.377691	5.91025	3.42e-09	6.35e-08
PMO000528	ANO10	40.1807	-1.44754	0.29957	4.8315	1.36e-06	1.44e-05
PMO000531	RSU1	41.5369	1.09912	0.277261	-3.96253	7.42e-05	0.000492098
PMO000535	EPC1	63.2016	0.725606	0.261314	-2.77573	0.00550784	0.0180406
PMO000537	SELO	12.8304	2.24489	0.468289	-4.72887	2.26e-06	2.28e-05
PMO000544	BTD	47.5818	-2.11636	0.533849	3.95573	7.63e-05	0.000505038
PMO000553	BGAL	40.7328	0.931583	0.353911	-2.63186	0.00849176	0.025732
PMO000558	VPS50	80.0865	-0.823554	0.276583	2.97803	0.0029011	0.0106715
PMO000559	MPP6	3.58742	2.86328	0.65928	-4.15644	3.23e-05	0.000238394
PMO000561	RARB	14.6928	0.834976	0.313123	-2.66143	0.00778091	0.0239504
PMO000563	NUPL2	19.4609	-3.62942	0.484441	7.36978	1.71e-13	6.36e-12
PMO000566	NEB1	24.3224	1.16882	0.385146	-3.0262	0.0024765	0.00937507
PMO000568	RBMS3	3.06503	1.55295	0.556415	-2.71465	0.00663465	0.0210184
PMO000569	AT2C1	98.3942	0.661883	0.237711	-2.78366	0.00537495	0.0177101
PMO000570	ABI1	131.272	1.58575	0.272221	-5.82276	5.79e-09	1.03e-07
PMO000572	SKDA1	3.32617	1.61027	0.6005	-2.61177	0.00900757	0.0269612
PMO000575	NOD1	27.1949	1.00914	0.40553	-2.4848	0.0129623	0.0362807
PMO000589	DNJC1	145.612	1.2305	0.358656	-3.43151	0.000600229	0.00288439
PMO000591	RUSD3	143.744	-1.52729	0.352165	4.33554	1.45e-05	0.000119085
PMO000592	SRGP3	19.9648	1.0568	0.333778	-3.16098	0.00157238	0.00641384
PMO000594	MIME	7.94142	2.12651	0.599608	-3.48971	0.000483552	0.00240952
PMO000598	UBA1	14.5386	-1.4692	0.407782	3.60032	0.000317831	0.00170135
PMO000600	ACPH	9.44806	1.30527	0.442059	-2.93352	0.00335147	0.0120091
PMO000601	BSN	78.7856	-2.04388	0.265375	7.69813	1.38e-14	5.86e-13
PMO000604	SPEN	112.335	-0.762129	0.228534	3.33478	0.000853681	0.00384102
PMO000609	SMIM4	2.42412	2.82236	0.68757	-4.00879	6.1e-05	0.000414652
PMO000615	SEM3G	76.4279	1.95071	0.421581	-4.62133	3.81e-06	3.66e-05
PMO000616	ABHEA	8.1872	1.85238	0.500185	-3.66493	0.00024741	0.00138056
PMO000624	SELK	43.3063	-2.01647	0.350211	5.75358	8.74e-09	1.5e-07
PMO000626	WNT5A	41.5132	2.60754	0.488717	-5.29978	1.16e-07	1.59e-06
PMO000630	DYH12	5.22664	3.21212	0.644384	-4.76829	1.86e-06	1.91e-05
PMO000633	RAB7A	283.4	-1.83162	0.288008	6.35879	2.03e-10	4.73e-09
PMO000635	S61A1	35.9733	1.29553	0.321068	-4.02698	5.65e-05	0.000389386
PMO000636	KBTBC	25.3672	3.45007	0.686793	-4.98907	6.07e-07	7.06e-06
PMO000639	MCM2	6.3125	1.17532	0.496802	-2.34882	0.0188331	0.0487937
PMO000640	S41A1	88.5423	-0.737307	0.310004	2.37827	0.017394	0.0456628
PMO000644	XPC	145.622	1.09531	0.260219	-4.20844	2.57e-05	0.000195527
PMO000648		60.9003	-1.3913	0.287686	4.83395	1.34e-06	1.43e-05
PMO000649	NDUF3	100.74	1.11959	0.408529	-2.74115	0.00612238	0.0196799
PMO000650	ODPB	971.443	-0.920596	0.288844	3.18703	0.00143741	0.0059721
PMO000655	THOC7	70.0748	1.13816	0.346725	-3.28357	0.00102501	0.00450217
PMO000656	PSMD6	819.862	-2.31499	0.330734	6.99776	2.6e-12	8.29e-11
PMO000664	UBA3	196.061	-0.592358	0.233019	2.54212	0.0110184	0.0317344
PMO000668	PZRN3	224.961	2.4435	0.431052	-5.66959	1.43e-08	2.36e-07
PMO000669	PZRN3	41.5643	2.31482	0.501671	-4.59357	4.36e-06	4.11e-05
PMO000672	MTR	4.55476	-1.10784	0.446086	2.47976	0.013147	0.0366513
PMO000673	RAD18	64.0335	-1.34438	0.292187	4.60113	4.2e-06	3.98e-05
PMO000674	SEC13	136.142	-1.25379	0.256828	4.88179	1.05e-06	1.16e-05
PMO000676	PLXD1	138.646	1.81579	0.386736	-4.69168	2.71e-06	2.69e-05
PMO000679	FGD5	180.553	1.85588	0.404889	-4.58141	4.62e-06	4.33e-05
PMO000680	ECM2	23.5263	2.10015	0.498221	-4.19474	2.73e-05	0.000206683
PMO000681	SHSA5	16.1799	2.17798	0.41001	-5.25876	1.45e-07	1.95e-06
PMO000683	HEMK1	3.88918	-1.66082	0.510435	3.23035	0.0012364	0.00530232
PMO000684	HSFY1	5.1525	-1.75324	0.753555	2.37016	0.0177805	0.0465593
PMO000685	OASL2	40.8325	-3.15499	0.443976	7.07525	1.49e-12	4.89e-11
PMO000688	H1X	110.019	-1.20465	0.343162	3.51045	0.000447355	0.00226127
PMO000691	P4HTM	67.3541	-1.81446	0.307112	5.90698	3.48e-09	6.47e-08
PMO000692	ARI2	235.143	-1.15333	0.29974	3.8477	0.000119232	0.000739855
PMO000693	ACOX2	290.74	1.28591	0.36529	-3.52058	0.0004306	0.00219343
PMO000695	FOXP1	14.5493	1.04348	0.440251	-2.36112	0.01822	0.0474834
PMO000699	ARHG3	25.89	1.27099	0.407737	-3.11218	0.00185713	0.00734201
PMO000701	KPCD	28.2008	-1.93461	0.457098	4.2278	2.36e-05	0.000181151
PMO000706	AMGO3	4.61232	1.75302	0.53372	-3.22748	0.00124886	0.00534704
PMO000707	LMOD3	248.025	2.09564	0.461707	-4.54248	5.56e-06	5.12e-05
PMO000708	HAUS3	1.4461	2.01828	0.716419	-2.85824	0.00425996	0.0147183
PMO000711	DUS7	35.0755	1.14147	0.307471	-3.70644	0.00021019	0.00119674
PMO000712	TASOR	30.1702	0.865686	0.341966	-2.52867	0.0114496	0.0328505
PMO000714	NICN1	8.42103	2.61056	0.484775	-5.21925	1.8e-07	2.37e-06
PMO000720	EOGT	33.691	1.80108	0.395953	-4.53153	5.86e-06	5.36e-05
PMO000724	BAP1	91.4006	0.7649	0.222503	-3.43681	0.000588598	0.00284017
PMO000725	CCD36	1.96926	2.50358	0.730634	-3.44931	0.000562025	0.0027282
PMO000729	FRM4B	30.0165	1.83465	0.505673	-3.61946	0.000295217	0.00160148
PMO000731	CNTN3	1.49531	2.16415	0.707063	-3.05119	0.00227935	0.00873556
PMO000736	IP6K1	63.9773	0.689046	0.272101	-2.53191	0.0113445	0.0325755
PMO000738	CAPS1	1.71708	1.86555	0.717651	-2.50901	0.0121072	0.0343717
PMO000739	MAPK3	33.4245	-1.25447	0.439185	2.85706	0.00427578	0.0147536
PMO000745	PARP6	38.9996	-2.64358	0.36617	7.20182	5.94e-13	2.07e-11
PMO000748	B2MG	549.075	-1.29118	0.47679	2.70635	0.00680273	0.0214283
PMO000749	OAZ2	25.6647	-1.01421	0.349148	2.90705	0.00364858	0.0129081
PMO000759	ZO1	431.293	1.57818	0.394675	-3.99902	6.36e-05	0.000430198
PMO000761	CCNB2	54.8905	-1.64018	0.262322	6.25089	4.08e-10	8.95e-09
PMO000762	HTF4	351.559	1.51569	0.395183	-3.83567	0.00012522	0.000771106
PMO000770	CSN2	390.202	-2.16154	0.335817	6.43508	1.23e-10	2.95e-09
PMO000771	ZNT4	55.8709	1.34762	0.276019	-4.87757	1.07e-06	1.18e-05
PMO000780	ZFAN6	50.5865	-4.51742	0.374638	11.8642	1.82e-32	3.82e-30
PMO000781	K1024	7.06455	2.7036	0.608534	-4.22406	2.4e-05	0.000183778
PMO000782	TICRR	21.5012	-1.25869	0.394942	3.18541	0.0014455	0.00599389
PMO000784	RT11	460.764	-1.05809	0.281108	3.76382	0.00016734	0.0009855
PMO000787	CRNL1	54.3201	1.9311	0.391487	-4.9315	8.16e-07	9.21e-06
PMO000789	IGF1R	104.302	-0.921933	0.288025	3.20059	0.00137147	0.00575491
PMO000793	LINES	20.6799	-1.8702	0.3604	5.18174	2.2e-07	2.84e-06
PMO000794	RU2A	27.0641	-2.16932	0.39712	5.45234	4.97e-08	7.32e-07
PMO000795	PCSK6	16.9804	1.23412	0.500165	-2.4561	0.0140455	0.0386747
PMO000796	SPG21	48.1931	-1.03108	0.282492	3.65089	0.000261336	0.00144448
PMO000797	KBTBD	63.7525	2.35296	0.416358	-5.63888	1.71e-08	2.77e-07
PMO000800	CILP1	67.9586	1.68445	0.514407	-3.27396	0.00106051	0.00463104
PMO000801	IGDC3	4.94654	-1.91097	0.559172	3.38263	0.000717958	0.00333589
PMO000806	TIPIN	9.47775	-1.71747	0.412847	4.15145	3.3e-05	0.00024301
PMO000809	AAGAB	15.4434	-1.54329	0.348759	4.42132	9.81e-06	8.46e-05
PMO000810	CALL4	18.6093	1.48193	0.634024	-2.34093	0.0192359	0.0496188
PMO000816	CTSL2	232.705	-0.860457	0.36439	2.3614	0.018206	0.0474727
PMO000822	AMPN	43.6574	1.25457	0.441505	-2.84191	0.00448446	0.0153278
PMO000824	CIB1	15.3653	3.12692	0.510073	-5.96876	2.39e-09	4.6e-08
PMO000826	UN45A	100.782	-0.899538	0.305201	2.94735	0.00320508	0.0115475
PMO000831	MAP1A	7.50028	1.19026	0.482367	-2.45566	0.0140625	0.0387113
PMO000834	LIPC	4.74469	1.87541	0.605138	-3.03769	0.00238401	0.00908277
PMO000836	CGNL1	44.0111	1.39296	0.406881	-3.41823	0.000630288	0.0030055
PMO000838	PAR16	142.948	-1.67872	0.34028	4.93281	8.11e-07	9.16e-06
PMO000852	HDGR3	7.94355	1.98785	0.47475	-4.12663	3.68e-05	0.000265711
PMO000858	PIGB	9.10073	-1.09288	0.432025	2.53148	0.0113583	0.0326064
PMO000864	SENP8	36.1111	-1.30534	0.368409	3.54351	0.000394832	0.00203687
PMO000867	FANCI	7.22001	2.09211	0.515811	-3.97374	7.08e-05	0.000472759
PMO000870	TMOD3	16.8986	1.48996	0.37654	-3.93724	8.24e-05	0.000537109
PMO000873	FAN1	100.263	-0.858922	0.303026	2.83486	0.00458452	0.015609
PMO000882	AP3S2	93.4147	1.88567	0.329692	-5.71597	1.09e-08	1.83e-07
PMO000883	KCRU	6.47993	-1.7224	0.486222	3.53473	0.000408185	0.00209651
PMO000895	CXXC5	7.21663	1.42734	0.554299	-2.55416	0.0106443	0.0308682
PMO000901	SYRC	80.3702	2.09664	0.393616	-5.32643	1e-07	1.4e-06
PMO000907	S22A5	25.893	-1.44512	0.387664	3.72311	0.000196785	0.00112859
PMO000911	KCT2	131.823	1.49948	0.299354	-5.00753	5.51e-07	6.51e-06
PMO000912	VDAC1	146.562	-1.03399	0.318951	3.24191	0.00118729	0.00511046
PMO000923	FA13B	336.787	1.81204	0.345799	-5.23941	1.61e-07	2.14e-06
PMO000926	TBC9B	214.835	-1.15857	0.187678	6.17312	6.7e-10	1.4e-08
PMO000929	PGFRB	61.6629	1.61253	0.550987	-2.92538	0.00344035	0.0123109
PMO000936	CCD69	29.4197	4.87247	0.54058	-8.04936	8.32e-16	4.16e-14
PMO000947	RN145	97.26	1.03272	0.327153	-3.15594	0.00159981	0.00650809
PMO000952	NOP16	208.219	-0.853707	0.299808	2.84747	0.00440676	0.0151261
PMO000954	RAB24	70.1419	-2.53931	0.324587	7.81519	5.49e-15	2.51e-13
PMO000957	GRK6	19.319	1.23164	0.364323	-3.37146	0.000747712	0.00345252
PMO000958	NPT2A	1.31812	1.92178	0.748695	-2.59912	0.0093462	0.027793
PMO000965	CRERF	252.752	2.07559	0.478814	-4.33713	1.44e-05	0.000118409
PMO000970	S3TC2	2.13623	2.49803	0.670027	-3.60455	0.000312697	0.00167985
PMO000975	C1QT2	5.64836	1.77492	0.50173	-3.47353	0.000513652	0.00253788
PMO000978	SYLC	306.147	-0.76545	0.297996	2.56875	0.0102066	0.0298314
PMO000986	FXDC2	33.611	-1.72019	0.397339	4.32889	1.5e-05	0.000122448
PMO000991	CPEB4	99.0017	2.20849	0.335294	-6.57342	4.92e-11	1.27e-09
PMO000993	ADRA2	9.80257	2.853	0.562364	-4.89076	1e-06	1.11e-05
PMO000997	RS14	921.772	2.18069	0.289882	-7.52263	5.37e-14	2.12e-12
PMO001000	CCNG1	75.6672	-1.52296	0.334535	4.55219	5.31e-06	4.91e-05
PMO001003	KC1A	473.314	-1.16312	0.388021	2.99711	0.0027255	0.0101677
PMO001004	LONF1	102.953	-0.901488	0.365579	2.46558	0.0136791	0.037874
PMO001005	TEN2	2.52879	2.9409	0.655552	-4.41706	1e-05	8.58e-05
PMO001010	FSTL4	1.33499	2.40185	0.705309	-3.40606	0.000659088	0.00311741
PMO001011	HXK3	5.41099	-1.50801	0.493183	3.05165	0.00227588	0.00872546
PMO001014	CDC23	42.7926	0.662722	0.278369	-2.3808	0.0172751	0.0454394
PMO001018	JKIP2	0.926262	1.72767	0.70091	-2.48245	0.0130482	0.0364422
PMO001022	STK10	104.327	1.81995	0.453621	-4.00846	6.11e-05	0.000414692
PMO001024	SPRC	171.299	1.5568	0.391539	-3.97547	7.02e-05	0.00046964
PMO001030	NDK5	6.698	2.17197	0.579002	-3.68213	0.00023129	0.00130305
PMO001032	VGFR3	100.408	1.70288	0.510368	-3.33563	0.00085107	0.00383091
PMO001036	MGT4B	76.0974	0.873369	0.373366	-2.33892	0.0193394	0.0498353
PMO001044	T150A	6.90719	1.14145	0.427549	-2.65444	0.0079441	0.0243672
PMO001051	NPY4R	1.99871	2.0678	0.698075	-2.85719	0.0042741	0.0147526
PMO001059	RPP30	15.5494	-4.64182	0.4403	9.71937	2.49e-22	2.36e-20
PMO001060	HECD2	8.72619	3.0097	0.574691	-4.96793	6.77e-07	7.8e-06
PMO001061	TNKS2	54.7867	0.985428	0.319481	-3.08104	0.00206281	0.00802849
PMO001064	F10C1	7.4687	-1.6903	0.461189	3.66055	0.000251672	0.00139915
PMO001066	CPEB3	91.985	1.1836	0.479324	-2.46912	0.0135446	0.037551
PMO001076	SFRP5	30.5656	1.3515	0.503126	-2.68325	0.00729097	0.0226945
PMO001079	MORN4	17.0087	-1.40286	0.41233	3.39842	0.000677762	0.00318253
PMO001086	DPOLL	65.8993	-2.13078	0.293687	7.25012	4.16e-13	1.47e-11
PMO001088	PDZD7	6.47426	-1.855	0.535423	3.44012	0.000581451	0.00281213
PMO001091	SUFU	46.8	-0.645361	0.256076	2.52078	0.0117094	0.03345
PMO001092	WBP1L	171.335	-0.797458	0.304252	2.62088	0.00877042	0.0264167
PMO001094	AS3MT	10.9736	2.10818	0.430569	-4.82963	1.37e-06	1.45e-05
PMO001097	RRP5	123.723	-0.890686	0.248247	3.58834	0.000332787	0.00176824
PMO001105	SMC3	89.6544	1.2501	0.388232	-3.21878	0.00128739	0.00546973
PMO001109	SHOC2	52.5047	-1.23656	0.310909	3.97658	6.99e-05	0.000468053
PMO001112	CASP7	9.63538	2.10681	0.440557	-4.71011	2.48e-06	2.48e-05
PMO001116	F16B1	395.826	-1.09155	0.347532	3.14039	0.00168724	0.00679025
PMO001121	NANO1	11.8258	4.52913	0.654399	-6.60732	3.91e-11	1.03e-09
PMO001125	SAC2	39.3195	1.14668	0.355943	-3.21921	0.00128546	0.00546373
PMO001133	PKHA1	20.6547	0.856833	0.358882	-2.38314	0.0171655	0.0452755
PMO001134	NDUB8	1038.12	0.941846	0.307344	-3.06467	0.00217914	0.0083943
PMO001135	MK08	29.0275	-1.0585	0.283938	3.72844	0.000192671	0.00110923
PMO001136	PCGF5	19.1699	1.62806	0.37618	-4.31234	1.62e-05	0.000130175
PMO001139	TRIM8	36.967	-1.19823	0.336118	3.56468	0.000364294	0.00190264
PMO001141	SLK	142.434	0.920487	0.387681	-2.374	0.0175966	0.0461237
PMO001142	SFR1	4.1744	1.55217	0.554171	-2.75113	0.00593901	0.0191972
PMO001143	ADDG	153.583	1.75735	0.419947	-4.18317	2.87e-05	0.000215173
PMO001158	MYOF	47.9894	1.27655	0.471187	-2.70622	0.00680546	0.0214305
PMO001162	MFRN2	130.579	1.62048	0.280601	-5.7722	7.82e-09	1.35e-07
PMO001163	SLIT1	10.8733	2.04299	0.549849	-3.68139	0.000231965	0.00130615
PMO001164	ATRN1	29.5615	2.80329	0.408573	-6.7736	1.26e-11	3.52e-10
PMO001166	NOLC1	119.021	1.18544	0.358033	-3.31039	0.000931657	0.00414052
PMO001172	LOXL4	3.22874	2.40155	0.667258	-3.51618	0.000437803	0.00222367
PMO001175	SC31B	45.8908	1.33389	0.332298	-4.00862	6.11e-05	0.000414681
PMO001179	MXI1	204.489	1.80643	0.316876	-5.69963	1.2e-08	2.01e-07
PMO001180	NFKB2	121.359	-1.03991	0.273409	3.80367	0.000142569	0.000861308
PMO001181	LDB1	58.1638	1.02473	0.393486	-2.60248	0.00925521	0.0275614
PMO001192	THADA	62.1708	1.00015	0.39184	-2.55218	0.0107052	0.0310078
PMO001195	MK01	103.112	0.840221	0.353434	-2.37644	0.0174806	0.0458389
PMO001198	2019-09-05	14.1423	1.33259	0.48648	-2.72263	0.00647647	0.0205854
PMO001200	TBX1	2.76478	1.59085	0.635223	-2.42577	0.0152758	0.0413655
PMO001201	COMT	60.9275	0.97324	0.311983	-3.11924	0.00181321	0.00719811
PMO001203	PGAM5	42.974	1.52084	0.33751	-4.50242	6.72e-06	6.05e-05
PMO001206	SUSD2	1.41243	-1.86172	0.717647	2.58617	0.00970493	0.0286573
PMO001215	TFP11	163.486	-0.758396	0.268581	2.82384	0.00474521	0.0160471
PMO001217	MMAB	21.0463	1.29733	0.428422	-3.02018	0.00252625	0.0095394
PMO001225	ERP29	71.9361	0.741867	0.261486	-2.83704	0.00455338	0.0155264
PMO001227	BRAP	83.7315	-0.780658	0.240024	3.25217	0.00114528	0.0049621
PMO001232	PPTC7	171.923	1.45207	0.378037	-3.83958	0.000123245	0.000762957
PMO001236	CLIP1	936.986	-0.934249	0.252099	3.70575	0.000210763	0.00119896
PMO001237	VP33A	93.7862	1.48731	0.240515	-6.18095	6.37e-10	1.34e-08
PMO001243	AT2A2	113.212	1.52693	0.305033	-5.0029	5.65e-07	6.65e-06
PMO001245	AR6P4	51.0855	-1.02985	0.362311	2.84323	0.00446593	0.0152794
PMO001246	SETD8	76.3088	1.31987	0.377739	-3.49424	0.000475408	0.00237569
PMO001248	TMED2	56.219	-0.608801	0.218956	2.78103	0.00541867	0.0178095
PMO001249	DDX55	46.2281	-1.5163	0.305526	4.96179	6.98e-07	8.03e-06
PMO001255	AACS	45.3138	2.22708	0.324444	-6.83873	7.99e-12	2.3e-10
PMO001258	PIWL1	1.00839	-2.16709	0.750945	2.81421	0.00488978	0.016417
PMO001259	AGRD1	294.553	-7.13112	0.361229	19.1447	1.07e-81	1.88e-78
PMO001264	IFT81	4.67497	1.70475	0.563421	-2.98395	0.00284556	0.0105261
PMO001265	NAA25	90.6691	-0.931637	0.3275	2.84394	0.0044559	0.01526
PMO001270	ZDHC8	9.59016	1.31576	0.464008	-2.81037	0.00494841	0.0165851
PMO001272	PPM1F	45.0814	1.72774	0.480968	-3.58181	0.000341217	0.00180451
PMO001282	TNG2	86.1131	0.743512	0.309057	-2.4054	0.0161548	0.0432715
PMO001286	DENR	11.006	-1.49927	0.440832	3.40336	0.000665635	0.00313991
PMO001287	KDM2B	55.0378	1.20838	0.254649	-4.74093	2.13e-06	2.15e-05
PMO001289	VPP2	144.731	-0.906411	0.307264	2.95027	0.00317496	0.0114743
PMO001293	PI4KA	146.912	0.800185	0.231726	-3.45258	0.000555261	0.00270285
PMO001296	TBL1R	22.8608	1.2706	0.330311	-3.8362	0.000124954	0.000770366
PMO001298	RL35A	873.029	2.04322	0.361354	-5.65572	1.55e-08	2.54e-07
PMO001299	LXN	3.52391	2.45451	0.642929	-3.7661	0.000165815	0.000978157
PMO001303	CLRN1	4.83081	3.79127	0.672652	-5.56727	2.59e-08	4.04e-07
PMO001307	CCNL1	121.486	-0.868772	0.238661	3.64047	0.000272144	0.0014948
PMO001308	OCX32	101.235	1.93884	0.445261	-4.35255	1.35e-05	0.000111506
PMO001310	IMA3	1217.33	0.891228	0.261077	-3.41374	0.00064077	0.00305134
PMO001312	NMD3	68.7627	-0.634904	0.261011	2.43304	0.0149726	0.0407057
PMO001317	GOLI4	28.5973	1.23814	0.380254	-3.2498	0.00115485	0.00499946
PMO001320	PHC3	24.6701	1.43825	0.423752	-3.37912	0.000727182	0.00336982
PMO001322	IF5A2	46.4784	-0.968733	0.371318	2.60972	0.0090616	0.0270882
PMO001323	TNIK	384.177	1.95107	0.357395	-5.4585	4.8e-08	7.12e-07
PMO001334	PSMD2	2380.23	-1.85424	0.315994	5.86707	4.44e-09	8.08e-08
PMO001336	PHF13	22.591	-3.43924	0.403334	8.42772	3.52e-17	2.08e-15
PMO001339	ACHG	76.46	-1.87452	0.365041	5.13228	2.86e-07	3.59e-06
PMO001340	ACHD	54.1863	-1.11867	0.365568	3.06017	0.00221209	0.00850879
PMO001344	DI3L2	50.4863	-0.908835	0.255712	3.55514	0.000377775	0.00195751
PMO001345	PSMD1	1237.83	-1.3556	0.324295	4.17967	2.92e-05	0.000218051
PMO001347	TFR1	328.462	2.60073	0.544332	-4.79191	1.65e-06	1.73e-05
PMO001352	BCL6	264.967	3.3094	0.463078	-7.14838	8.78e-13	2.96e-11
PMO001365	P2Y14	2.16051	2.19047	0.670061	-3.19185	0.00141364	0.00588497
PMO001372	SSRG	100.21	-1.41719	0.38341	3.69661	0.000218497	0.00123694
PMO001374	PLCH1	14.6172	3.30925	0.522784	-6.07041	1.28e-09	2.56e-08
PMO001375	RM47	139.24	-1.04672	0.319686	3.27448	0.00105857	0.00462831
PMO001377	PROF2	95.2134	-1.22849	0.408132	3.01001	0.00261237	0.00982229
PMO001383	COMD2	57.5317	-0.826136	0.280129	2.94941	0.00318386	0.0115026
PMO001388	ACK1	558.85	1.04071	0.395559	-2.63144	0.0085025	0.0257497
PMO001403	AP2M1	584.81	-0.615548	0.239346	2.57183	0.0101162	0.0296059
PMO001409	FA73A	45.6341	1.13205	0.466521	-2.42384	0.0153576	0.0415325
PMO001416	KIF2C	6.44825	-2.72398	0.502781	5.30114	1.15e-07	1.59e-06
PMO001422	SELPB	5.65506	-2.61005	0.626906	4.09467	4.23e-05	0.000300625
PMO001423	MUTYH	13.5094	0.869952	0.370519	-2.34496	0.0190292	0.0492298
PMO001428	MKNK1	138.2	1.06824	0.419576	-2.54641	0.0108838	0.0314068
PMO001438	CA123	71.7862	-0.88768	0.372802	2.3809	0.0172703	0.0454381
PMO001442	CDCP2	2.07119	1.80063	0.644294	-2.71481	0.00663144	0.0210145
PMO001443	SSBP3	2.27631	2.71228	0.670786	-4.01675	5.9e-05	0.000403767
PMO001444	SYPM	59.4357	1.26643	0.376797	-3.35979	0.000780005	0.00357369
PMO001445	DHC24	66.9035	1.97329	0.428618	-4.59542	4.32e-06	4.08e-05
PMO001449	MYSM1	59.1571	1.58297	0.326388	-4.84287	1.28e-06	1.38e-05
PMO001455	KANK4	15.9455	1.73376	0.474792	-3.6269	0.00028685	0.0015593
PMO001458	WDR78	8.17929	4.65382	0.625855	-7.19575	6.21e-13	2.15e-11
PMO001478	TTC4	44.8301	1.08344	0.282267	-3.83695	0.000124574	0.000768924
PMO001479	SC6A9	57.5676	1.06793	0.412856	-2.58472	0.00974578	0.0287376
PMO001485	NRDC	1389.98	-0.734387	0.280265	2.62027	0.00878602	0.0264475
PMO001491	DNJB4	339.591	1.41354	0.520213	-2.72074	0.00651368	0.0206912
PMO001492	TAL1	203.228	4.24746	0.507373	-8.34527	7.11e-17	4e-15
PMO001502	P85A	28.9672	1.60248	0.460269	-3.47547	0.000509964	0.0025244
PMO001506	EI2BG	186.962	-1.12886	0.232703	4.85128	1.23e-06	1.32e-05
PMO001510	MTMR6	29.4991	0.976168	0.38756	-2.51395	0.0119387	0.0340126
PMO001517	UBP12	15.2877	-2.57681	0.451862	5.67132	1.42e-08	2.34e-07
PMO001519	RNF6	174.998	-0.788036	0.245725	3.20695	0.0013415	0.00566132
PMO001524	SACS	24.2762	1.4935	0.495742	-3.00001	0.00269968	0.0100965
PMO001525	LATS2	201.622	1.2011	0.443565	-2.70776	0.00677399	0.0213569
PMO001533	RHG20	2.94862	2.26222	0.634607	-3.40655	0.000657887	0.00311453
PMO001545	MAML2	5.62354	1.60702	0.49343	-3.20082	0.00137036	0.00575255
PMO001546	MTMR2	20.5922	1.08469	0.321885	-3.36358	0.000769385	0.00353427
PMO001548	CWC15	134.299	-0.908919	0.269658	3.37101	0.000748932	0.00345388
PMO001551	TAF1D	32.6299	-1.06694	0.316538	3.37132	0.000748082	0.00345252
PMO001555	CHRD1	44.4913	2.25461	0.325394	-6.90238	5.11e-12	1.53e-10
PMO001556	CATC	1273.46	-1.57425	0.379565	4.1463	3.38e-05	0.000247456
PMO001560	MAON	183.671	3.72348	0.501796	-7.42821	1.1e-13	4.2e-12
PMO001566	CCD83	2.87886	-2.29587	0.650006	3.43455	0.000593548	0.00285619
PMO001567	EED	6.33301	1.59467	0.506076	-3.1268	0.00176723	0.00705818
PMO001570	KCD21	4.02549	1.60791	0.486242	-3.23439	0.00121901	0.00523629
PMO001573	S46A3	254.612	-1.45646	0.461881	3.15093	0.00162749	0.00660282
PMO001575	MSD4	15.1158	1.1914	0.425422	-2.79214	0.00523605	0.0173776
PMO001576	MICU2	95.6209	1.28551	0.453947	-2.83045	0.0046483	0.0157744
PMO001581	CCD82	5.22266	1.41532	0.53186	-2.62527	0.00865806	0.0261299
PMO001589	PDGFD	31.0464	2.56533	0.46191	-5.5087	3.61e-08	5.53e-07
PMO001590	PSPC1	32.8236	-2.08637	0.381262	5.46645	4.59e-08	6.86e-07
PMO001597	SKA3	6.59036	3.44356	0.609252	-5.27985	1.29e-07	1.76e-06
PMO001600	TRPC6	12.0539	2.35797	0.491594	-4.7051	2.54e-06	2.54e-05
PMO001601	DCNL5	53.8014	-0.967928	0.265443	3.64708	0.000265233	0.00146199
PMO001606	MAML2	6.3834	1.76344	0.510262	-3.38708	0.000706415	0.00329098
PMO001608	ENTP2	18.7945	1.3225	0.55081	-2.40028	0.0163827	0.0437298
PMO001620	RL12	499.957	-1.14558	0.300296	3.81465	0.000136374	0.000829596
PMO001624	NSMF	7.03912	2.21498	0.598756	-3.63447	0.000278548	0.00152241
PMO001626	TO4AA	40.7157	-1.31085	0.360703	3.63377	0.000279307	0.00152514
PMO001639	F102A	18.614	2.12281	0.428342	-4.90656	9.27e-07	1.04e-05
PMO001640	DPM2	1.17826	1.77367	0.727956	-2.48127	0.0130915	0.0365258
PMO001641	SIA7D	39.0364	0.915236	0.379803	-2.40994	0.0159549	0.0428514
PMO001643	KAD1	4948.37	0.900579	0.343939	-2.61872	0.008826	0.0265461
PMO001644	EGLN	479.387	1.27227	0.385842	-3.29792	0.00097404	0.00431188
PMO001647	TRUB2	58.9355	-0.742982	0.268605	2.76682	0.00566062	0.0184778
PMO001649	CIZ1	22.1009	0.919484	0.356868	-2.57709	0.00996361	0.0292407
PMO001651	SPTN1	895.617	1.31534	0.334564	-3.93185	8.43e-05	0.000546599
PMO001657	FA73B	12.4121	1.36081	0.494617	-2.72924	0.00634812	0.0202693
PMO001662	HMCN2	42.7259	1.95212	0.691027	-2.86455	0.00417603	0.0144758
PMO001668	PPAC3	55.8782	1.97492	0.510604	-3.86259	0.000112189	0.000702787
PMO001676	GFI1B	14.7911	1.76339	0.542153	-3.24152	0.00118894	0.00511544
PMO001682	PRRX2	1.45242	1.88286	0.715244	-2.57909	0.00990617	0.0291208
PMO001684	DPP2	163.891	-1.79963	0.284376	6.32745	2.49e-10	5.67e-09
PMO001685	UBP20	128.001	0.760463	0.293387	-2.5911	0.00956704	0.0283296
PMO001691	EXOS2	23.0173	0.775375	0.311749	-2.48553	0.012936	0.0362263
PMO001692	SAPC2	3.8193	3.25133	0.620658	-4.98956	6.05e-07	7.05e-06
PMO001693	NELFB	72.3932	-1.51658	0.360064	4.21145	2.54e-05	0.000193361
PMO001702	TOR1B	30.8111	1.1527	0.273014	-4.21829	2.46e-05	0.000188131
PMO001715	YDJC	35.9089	-1.87096	0.43093	4.33794	1.44e-05	0.000118138
PMO001716	UFD1	327.527	-3.39475	0.281595	12.0485	1.98e-33	4.52e-31
PMO001720	GOGA3	107.573	1.08748	0.368649	-2.94823	0.00319596	0.0115363
PMO001721	AUTS2	232.571	-1.31081	0.347477	3.77187	0.000162027	0.000958792
PMO001724	HSC20	59.381	-1.28552	0.358987	3.58101	0.000342264	0.00180913
PMO001739	PTN11	455.339	-0.871159	0.241309	3.61019	0.000305971	0.00165215
PMO001740	TRAD1	49.9052	-0.689093	0.266374	2.58719	0.0096761	0.0285882
PMO001743	B3GN4	1.36569	-2.50072	0.68722	3.65187	0.000260336	0.00144047
PMO001744	WDR66	304.182	1.30142	0.465472	-2.7977	0.00514682	0.01713
PMO001748	APC7	54.1803	-1.30257	0.263443	4.94417	7.65e-07	8.72e-06
PMO001752	ABCB9	60.6814	-1.3809	0.367884	3.75088	0.000176215	0.0010297
PMO001755	SCRB1	174.188	-1.72174	0.366725	4.69406	2.68e-06	2.67e-05
PMO001757	BRI3B	27.6213	1.16358	0.44345	-2.61657	0.00888177	0.0266681
PMO001761	MPP9	23.1165	1.10202	0.391737	-2.80734	0.00499522	0.0167207
PMO001762	KNTC1	11.4142	2.78901	0.551833	-4.91827	8.73e-07	9.78e-06
PMO001769	TRUA	71.491	-0.752262	0.236325	3.18361	0.0014545	0.00601461
PMO001772	HEP2	19.2951	1.82691	0.50173	-3.61758	0.000297372	0.00160984
PMO001775	RIPL2	24.268	1.7542	0.455505	-3.83868	0.000123697	0.000764859
PMO001777	STX2	44.5852	0.81749	0.321565	-2.54084	0.0110587	0.0318332
PMO001778	CHFR	32.1614	1.01091	0.402006	-2.51153	0.012021	0.0341917
PMO001782	EI2BA	53.6783	-1.64137	0.32799	5.00359	5.63e-07	6.64e-06
PMO001783	PITM2	338.271	2.39916	0.403995	-5.93752	2.89e-09	5.46e-08
PMO001784	RNF34	86.5094	1.0199	0.243759	-4.18227	2.89e-05	0.000215835
PMO001787	SH2B3	135.816	1.3643	0.543206	-2.51367	0.0119482	0.0340214
PMO001789	SRR1L	16.7223	-2.343	0.376323	6.19992	5.65e-10	1.21e-08
PMO001792	ARBK2	53.8387	0.733702	0.255199	-2.87349	0.0040597	0.0141097
PMO001793	ARVC	25.3666	1.9409	0.43959	-4.38557	1.16e-05	9.77e-05
PMO001797	UBE3B	149.63	1.19033	0.358362	-3.3204	0.000898892	0.00401867
PMO001807	SET1B	74.4045	1.21861	0.358	-3.40041	0.000672855	0.00316829
PMO001815	MARCS	19.0318	1.42214	0.496806	-2.85198	0.00434481	0.0149476
PMO001817	RPF2	71.9792	-1.36223	0.318127	4.28236	1.85e-05	0.000146545
PMO001819	DCAM	116.773	1.07615	0.339529	-3.16854	0.00153209	0.00627869
PMO001821	LACE1	21.3084	0.979004	0.40446	-2.41801	0.0156058	0.0420458
PMO001823	GATA	113.368	-1.41475	0.338158	4.18368	2.87e-05	0.000214997
PMO001826	KLH32	1.32939	2.38454	0.703163	-3.39785	0.000679185	0.00318527
PMO001829	P20D2	371.351	-1.21972	0.351706	3.46737	0.000525568	0.00258946
PMO001833	5NTD	3.55712	2.26152	0.657519	-3.35343	0.000798163	0.00363788
PMO001841	CD109	8.72793	2.10793	0.549981	-3.75071	0.000176333	0.00102981
PMO001849	BAG2	56.9628	-2.07997	0.405591	5.12325	3e-07	3.76e-06
PMO001850	ZN451	52.0581	-1.08545	0.255597	4.24625	2.17e-05	0.000169336
PMO001856	FBX9	147.033	0.815012	0.303823	-2.68283	0.00730025	0.02271
PMO001871	S35A1	24.0036	-1.40529	0.337818	4.1608	3.17e-05	0.000234539
PMO001874	FIG4	14.4202	-2.29932	0.369978	6.1835	6.27e-10	1.32e-08
PMO001878	DOP1	84.0019	0.852971	0.266672	-3.19764	0.00138555	0.00580013
PMO001880	PHF3	439.265	1.04796	0.3755	-2.79108	0.00525332	0.0174129
PMO001883	ELOA1	2.14742	2.04263	0.702859	-2.8702	0.00410218	0.014248
PMO001885	ORC3	10.4667	-1.67878	0.440509	3.80729	0.000140501	0.000850275
PMO001891	ARMC2	5.62495	3.33934	0.590304	-5.28083	1.29e-07	1.75e-06
PMO001898	FRMD3	15.948	2.16186	0.59161	-3.64394	0.000268492	0.0014786
PMO001905	F16P1	181.203	4.85149	0.519052	-9.28993	1.54e-20	1.24e-18
PMO001909	GOLM1	26.6964	-1.19199	0.347682	3.42817	0.000607673	0.00291086
PMO001911	HNRPK	162.404	-0.926349	0.290927	3.18431	0.00145098	0.00601016
PMO001919	FRDA	33.3813	-1.07925	0.435488	2.47922	0.013167	0.0366808
PMO001923	RS6	2392.79	-1.58833	0.372543	4.26241	2.02e-05	0.000158474
PMO001924	PLIN2	1282.01	-2.21619	0.357458	6.19791	5.72e-10	1.22e-08
PMO001927	PSIP1	112.498	-1.03017	0.361205	2.85231	0.00434025	0.0149368
PMO001936	ERMP1	60.6107	-1.0459	0.319011	3.27783	0.00104608	0.00457751
PMO001941	PGM5	53.6151	0.674064	0.264258	-2.55024	0.0107649	0.0311234
PMO001942	TNPO1	84.6715	-0.919204	0.369796	2.48517	0.0129491	0.0362533
PMO001946	ARG28	32.6044	-1.20391	0.502835	2.39102	0.0168017	0.0445506
PMO001947	NSA2	184.103	-0.853577	0.363638	2.34722	0.018914	0.048967
PMO001948	HMDH	66.1084	-1.28965	0.382989	3.36585	0.000763078	0.00350989
PMO001952	IQGA2	12.1059	-1.31972	0.420109	3.1374	0.00170453	0.00685199
PMO001956	K0020	91.349	-1.26108	0.385389	3.2721	0.00106751	0.00465252
PMO001962	TM171	4.80948	3.6751	0.640792	-5.56455	2.63e-08	4.1e-07
PMO001967	CBWD1	28.1258	-1.08397	0.42676	2.53973	0.0110939	0.0319197
PMO001968		8.25076	3.75361	0.578949	-5.91788	3.26e-09	6.12e-08
PMO001971	HEXB	125.165	2.41412	0.352786	-6.83715	8.08e-12	2.32e-10
PMO001976	GNAQ	38.489	3.99434	0.358617	-10.7947	3.64e-27	4.79e-25
PMO001977	UTP15	122.682	-1.37651	0.332109	4.1444	3.41e-05	0.000248827
PMO001978	TUT7	52.5142	-1.05578	0.364993	2.89214	0.00382631	0.0134182
PMO001980	RIFK	39.1688	-2.61246	0.312286	8.34573	7.08e-17	4e-15
PMO001985	CBPC1	129.165	1.57905	0.399978	-3.94642	7.93e-05	0.000520156
PMO001987	AGGF1	67.3928	-0.944137	0.331018	2.85266	0.00433555	0.0149255
PMO001992	CLCN1	52.5316	2.81586	0.489209	-5.73679	9.65e-09	1.62e-07
PMO001997	AT1B1	548.684	-0.875389	0.224214	3.90424	9.45e-05	0.000604334
PMO001998	GO45	43.6063	-1.27384	0.267115	4.76906	1.85e-06	1.91e-05
PMO001999	S35A5	67.8292	-1.07339	0.267524	4.01216	6.02e-05	0.000410094
PMO002000	GTPB8	80.545	2.95572	0.293552	-10.019	1.26e-23	1.28e-21
PMO002017	T2EA	34.2776	0.715133	0.250434	-2.85485	0.0043057	0.0148352
PMO002018	CTC1	25.4987	-2.03284	0.320612	6.33157	2.43e-10	5.54e-09
PMO002020	FA46C	2.50076	2.47135	0.636333	-3.73789	0.000185568	0.00107421
PMO002021	3BHS	1.96528	-2.62548	0.729506	3.52476	0.000423874	0.00216441
PMO002024	CYTB	13.7173	1.18101	0.403039	-2.92157	0.00348268	0.0124243
PMO002025	FBX40	103.87	2.61168	0.475961	-5.48009	4.25e-08	6.38e-07
PMO002030	LAG3	1.80914	2.67428	0.702273	-3.8101	0.000138908	0.000842578
PMO002035	C10	106.383	4.28957	0.413689	-10.2538	1.14e-24	1.25e-22
PMO002037	NEP1	55.7625	-1.01616	0.349543	2.90738	0.00364472	0.0129018
PMO002039	CSTN3	15.38	1.01715	0.392729	-2.58606	0.009708	0.0286583
PMO002044	EPHB5	7.61671	1.62236	0.593326	-2.70566	0.00681694	0.021441
PMO002054	UBP5	228.173	-0.697605	0.291733	2.3913	0.0167888	0.0445401
PMO002058	NDUB4	1087.19	0.686433	0.290412	-2.36371	0.0180927	0.0472359
PMO002065	AT1A1	2975.04	-0.798973	0.243193	3.28529	0.00101877	0.00447851
PMO002069	ZYX	178.618	-1.86053	0.323705	5.74602	9.14e-09	1.54e-07
PMO002070	SCNNA	9.28755	1.52403	0.474211	-3.1951	0.00139783	0.00583762
PMO002074	EVL	17.632	5.04071	0.544407	-8.18935	2.63e-16	1.42e-14
PMO002082	ARI4A	442.114	-0.628926	0.237843	2.64433	0.00818524	0.024983
PMO002086	SOCS4	40.1875	-0.77244	0.281971	2.73863	0.00616965	0.0197944
PMO002089	PLD4	14.0768	-1.13555	0.412946	2.74605	0.00603169	0.0194537
PMO002090	C170B	17.0176	1.883	0.523641	-3.56112	0.000369273	0.00192197
PMO002092	INF2	33.3727	1.41479	0.365906	-3.85746	0.00011457	0.000714722
PMO002095	APOP1	13.7597	3.53703	0.480348	-6.94834	3.7e-12	1.14e-10
PMO002096	TRM61	13.1677	-1.28181	0.431146	2.97513	0.00292867	0.0107504
PMO002097	MARK3	382.695	-0.75811	0.297681	2.54677	0.0108726	0.0313832
PMO002098	IF5	1724.51	-0.802521	0.316203	2.53785	0.0111535	0.0320798
PMO002100	LBH	50.0021	2.65939	0.448786	-5.88526	3.97e-09	7.29e-08
PMO002104	DYHC1	1796.94	-0.827941	0.151727	5.45673	4.85e-08	7.17e-07
PMO002117	GLRX5	285.681	3.51774	0.443042	-7.93763	2.06e-15	9.86e-14
PMO002125	ZC3HE	189.326	-1.61542	0.333986	4.83645	1.32e-06	1.41e-05
PMO002131	PP4R4	4.85351	3.4396	0.636266	-5.15962	2.47e-07	3.16e-06
PMO002133	IOD3	1.2575	-1.68351	0.691007	2.39102	0.0168017	0.0445506
PMO002134		47.0023	0.991778	0.382342	-2.59234	0.00953259	0.0282475
PMO002139	TNAP2	16.5085	2.04931	0.472097	-4.30634	1.66e-05	0.000133241
PMO002145	FBX34	318.5	-0.841006	0.335375	2.50741	0.0121618	0.0344869
PMO002148	ZFY21	21.8106	1.40019	0.354291	-3.93975	8.16e-05	0.000532832
PMO002149	KLC1	67.4134	0.713929	0.294606	-2.42254	0.0154125	0.0416434
PMO002150	CP46A	22.9249	1.11795	0.44183	-2.5308	0.0113803	0.0326606
PMO002152	TRAF3	19.1289	-1.79339	0.565721	3.1645	0.00155347	0.00635397
PMO002157	CN159	7.49328	-1.64365	0.453558	3.61423	0.00030124	0.00162827
PMO002169	PURA2	332.944	-2.0387	0.332275	6.13412	8.56e-10	1.77e-08
PMO002175	CMTR1	32.1819	-1.69843	0.402213	4.21665	2.48e-05	0.000189366
PMO002183	MCFD2	7.51888	-1.76063	0.484115	3.62456	0.000289455	0.00157184
PMO002192	RCOR3	24.1111	-1.45931	0.282111	5.17024	2.34e-07	3e-06
PMO002195	NENF	29.1408	1.822	0.437036	-4.16854	3.07e-05	0.000227841
PMO002200	KCTD3	171.778	-0.676384	0.246395	2.74535	0.00604468	0.0194837
PMO002203	TGFB2	16.2599	1.32588	0.425556	-3.10574	0.00189805	0.00748411
PMO002206	TREF1	37.6167	2.66627	0.327552	-8.07817	6.57e-16	3.34e-14
PMO002209	SRBD1	22.1937	0.91957	0.383489	-2.39407	0.0166625	0.0442929
PMO002225	PLB1	24.0994	-1.4894	0.366459	4.06014	4.9e-05	0.000344083
PMO002227	KS6C1	16.3998	1.3715	0.379567	-3.59379	0.000325902	0.00173661
PMO002228	DIEXF	32.5752	-1.33802	0.308471	4.33844	1.43e-05	0.000117982
PMO002232	DAAM2	10.1684	1.50646	0.486418	-3.06671	0.00216431	0.00835248
PMO002235	FLVC1	87.1812	2.49974	0.481629	-5.18057	2.21e-07	2.86e-06
PMO002237	LPPRC	571.117	-0.917816	0.363294	2.52612	0.0115329	0.0330441
PMO002238	TATD3	29.9434	1.6383	0.354887	-4.60986	4.03e-06	3.84e-05
PMO002245	NRDE2	97.605	-0.725548	0.290563	2.4972	0.0125178	0.0352332
PMO002248	TIM9	3.54539	3.67827	0.650403	-5.56871	2.57e-08	4.03e-07
PMO002253	BMP4	121.668	-1.30425	0.365643	3.566	0.00036247	0.00189595
PMO002258	AHNK	232.784	1.71476	0.404291	-4.24146	2.22e-05	0.000172479
PMO002263	BAG5	52.749	1.21512	0.510386	-2.37816	0.0173991	0.0456628
PMO002268	HS90A	7047.86	0.622373	0.266984	-3.48641	0.000489555	0.00243712
PMO002271	MCATL	55.204	-1.05079	0.44633	2.35427	0.0185593	0.0481791
PMO002272	DEGS2	1.06511	2.15049	0.714161	-3.01198	0.00259554	0.00976947
PMO002277	GSC	2.32367	1.72431	0.663361	-2.54892	0.0108057	0.0312159
PMO002284	OGR1	2.77243	1.92095	0.716529	-2.58484	0.00974229	0.0287354
PMO002288	TAC2N	16.6228	-1.56527	0.518909	3.00873	0.00262344	0.00985687
PMO002289	ASB2	1088.1	2.62345	0.519495	-5.06451	4.09e-07	4.96e-06
PMO002291	CC85C	37.6398	1.29462	0.457717	-2.8213	0.00478289	0.016133
PMO002296	P4R3A	164.177	0.690367	0.278313	-2.48032	0.0131265	0.0366136
PMO002297	BAKOR	33.4704	-1.55974	0.379682	4.10564	4.03e-05	0.00028865
PMO002299	PTN21	161.865	1.97132	0.438512	-4.49337	7.01e-06	6.28e-05
PMO002303	LGMN	230.711	-2.70834	0.341163	7.93371	2.13e-15	1.01e-13
PMO002305	AKT1	48.2945	0.967857	0.30669	-3.15338	0.00161392	0.0065528
PMO002307	DAPLE	159.703	1.50944	0.387188	-3.89876	9.67e-05	0.000614814
PMO002312	SYNE3	33.4387	1.9333	0.456869	-4.21074	2.55e-05	0.000193826
PMO002314	ITPK1	26.7768	3.74558	0.457837	-7.90011	2.79e-15	1.31e-13
PMO002315	ATX3	16.1785	0.888078	0.347858	-2.5462	0.0108903	0.0314171
PMO002318	NUP62	148.134	-0.787067	0.28866	2.72684	0.00639434	0.0203798
PMO002319	MYPR	15.1376	1.14395	0.479586	-2.37894	0.0173627	0.0456243
PMO002321	TMM35	2.85309	1.64808	0.57355	-2.78239	0.00539609	0.017763
PMO002322	EM55	734.415	2.10229	0.402068	-5.23108	1.69e-07	2.23e-06
PMO002323	FA8	599.827	2.4125	0.406213	-5.94109	2.83e-09	5.37e-08
PMO002325	ACRC	9.68585	-1.87308	0.436005	4.28245	1.85e-05	0.000146545
PMO002326	RHOG	10.9081	1.10152	0.430069	-2.5469	0.0108685	0.03138
PMO002332	LRCH2	5.74784	1.54058	0.485065	-3.12555	0.00177473	0.00708279
PMO002334	IDS	57.0016	1.29271	0.386355	-3.34667	0.000817883	0.00371254
PMO002336	C99L2	67.0294	1.40711	0.364281	-3.85791	0.000114361	0.000714262
PMO002341	STAG2	461.867	1.05844	0.372539	-2.84118	0.00449467	0.0153578
PMO002343	KAISO	90.7065	-0.742409	0.267112	2.77893	0.00545375	0.0178969
PMO002344	NDUA1	11.7322	-4.20298	0.575984	6.845	7.65e-12	2.22e-10
PMO002346	UBE2A	61.9024	-1.68539	0.384944	4.37838	1.2e-05	0.000100586
PMO002347	S2543	732.348	-1.21117	0.356675	3.39525	0.000685669	0.00321018
PMO002348	PGRC1	58.4258	-1.43413	0.351406	4.07895	4.52e-05	0.000319529
PMO002355	STK26	105.94	1.0394	0.36739	-2.82788	0.00468568	0.0158866
PMO002362	NIPA2	10.4701	1.31597	0.398717	-3.28552	0.00101794	0.0044768
PMO002363	PICAL	85.5042	0.715213	0.28668	-2.49414	0.0126263	0.0354532
PMO002367	ADT2	99.0854	-3.84485	0.442734	8.64723	5.28e-18	3.33e-16
PMO002368	LONF3	182.383	-0.836137	0.354218	2.3601	0.0182699	0.0475477
PMO002383	ATG4A	41.5924	0.944582	0.333061	-2.83578	0.00457134	0.0155778
PMO002393	CO8G	4.61325	-3.49829	0.646128	5.16273	2.43e-07	3.12e-06
PMO002394	AEGP	36.6165	-2.58532	0.421247	6.11962	9.38e-10	1.92e-08
PMO002395	CI172	2.50309	2.06654	0.699509	-2.89074	0.00384336	0.0134735
PMO002397	NRARP	4.90865	2.11579	0.675442	-3.05009	0.00228771	0.00876122
PMO002399	MUT7	58.3974	-0.921535	0.340129	2.71022	0.00672394	0.0212182
PMO002404	ZN618	25.9543	0.85858	0.341369	-2.51028	0.0120636	0.034285
PMO002406	RGS3	29.5638	1.86469	0.298904	-6.21347	5.18e-10	1.11e-08
PMO002408	PRP4	104.299	-1.10265	0.344376	3.20162	0.00136655	0.00574344
PMO002411	LRSM1	132.026	-2.26375	0.337114	6.71227	1.92e-11	5.22e-10
PMO002414	NIBL1	149.08	1.22784	0.361643	-3.3945	0.000687532	0.00321582
PMO002418	MEGF9	52.4233	1.40857	0.473405	-2.973	0.00294902	0.01081
PMO002420	FOLC	70.02	-0.853621	0.267641	3.18969	0.00142423	0.00592312
PMO002421	CDK9	56.6725	-1.45795	0.280333	5.20054	1.99e-07	2.6e-06
PMO002423	S27A4	128.885	0.884501	0.247973	-3.56619	0.000362207	0.00189595
PMO002424	DYN1	28.4708	0.98119	0.402684	-2.43153	0.015035	0.0408017
PMO002426	ZDH12	5.53597	1.16122	0.479692	-2.40682	0.0160923	0.0431589
PMO002427	ZER1	230.264	-0.744412	0.264338	2.81617	0.00486002	0.0163356
PMO002429	DOLK	26.6227	-1.49177	0.36188	4.12152	3.76e-05	0.000271304
PMO002432	ASB6	57.1984	-0.628006	0.262634	2.39148	0.0167808	0.04454
PMO002435	CI078	232.036	-0.604466	0.248599	2.43161	0.0150318	0.0408017
PMO002436	FNBP1	140.053	1.50548	0.300784	-5.00243	5.66e-07	6.66e-06
PMO002439	FA78A	19.6061	2.31316	0.702237	-3.33819	0.000843264	0.00380065
PMO002440	MED27	67.4549	-0.894938	0.268021	3.3396	0.000838978	0.00378782
PMO002453	UCK1	34.3395	-1.75829	0.294385	5.96829	2.4e-09	4.6e-08
PMO002461	UAP1L	20.979	1.2274	0.304089	-4.02538	5.69e-05	0.000391531
PMO002468	MTG8	30.655	2.52708	0.423589	-5.91197	3.38e-09	6.31e-08
PMO002470	RB12B	88.5342	1.1	0.334407	-3.28841	0.00100754	0.00444024
PMO002471	MTEF3	133.485	-1.77999	0.247035	7.20379	5.86e-13	2.05e-11
PMO002490	ANR12	342.286	0.719056	0.294047	-2.44541	0.0144688	0.0396328
PMO002492	MTCL1	326.882	1.75457	0.485267	-3.61876	0.000296015	0.00160498
PMO002493	LRC30	12.2762	3.50357	0.656556	-5.08522	3.67e-07	4.5e-06
PMO002495	AKR	447.841	-1.00013	0.41332	2.41909	0.0155594	0.0419864
PMO002496	MLRN	19.1879	1.68056	0.73994	-2.35445	0.0185499	0.0481667
PMO002501	ROCK1	101.496	0.86372	0.313671	-2.75293	0.00590648	0.0191261
PMO002508	GEM	8.1948	1.09675	0.440551	-2.47588	0.0132909	0.0369741
PMO002509	VAPA	169.355	-1.44565	0.360372	4.01132	6.04e-05	0.000411289
PMO002512	MLRN	140.65	-2.86659	0.401629	7.1278	1.02e-12	3.42e-11
PMO002513	SYBU	2.96692	1.83306	0.647182	-2.73599	0.00621937	0.0199368
PMO002516	LRAD4	111.196	-1.88861	0.246535	7.65917	1.87e-14	7.78e-13
PMO002517	PSMG2	96.0317	-2.44692	0.38233	6.39405	1.62e-10	3.82e-09
PMO002519	TBB5	43.5781	1.50566	0.422467	-3.56373	0.000365626	0.00190771
PMO002522	PTPRM	241.556	0.936659	0.285041	-3.28552	0.00101796	0.0044768
PMO002532	CIDEA	32.3781	-1.83058	0.382387	4.78244	1.73e-06	1.8e-05
PMO002542	TCEA3	911.025	-3.29107	0.36308	9.05911	1.32e-19	9.75e-18
PMO002544	YRK	52.7453	1.85462	0.420179	-4.40513	1.06e-05	9.02e-05
PMO002545	WASF2	17.6053	1.20049	0.414649	-2.88758	0.00388219	0.0135957
PMO002552		3.45607	-2.50933	0.590796	4.13405	3.56e-05	0.00025834
PMO002558	ELOA1	367.477	1.72311	0.185833	-9.27054	1.85e-20	1.47e-18
PMO002559	LYPA2	161.478	-3.53438	0.350184	10.0725	7.31e-24	7.62e-22
PMO002560	PNRC2	206.79	1.93912	0.38535	-5.03113	4.88e-07	5.82e-06
PMO002563	SRRM1	105.531	-5.68035	0.265117	20.8752	9e-97	3.16e-93
PMO002564	CLIC4	82.5065	1.59853	0.451093	-3.54015	0.000399895	0.00205794
PMO002567	MACOI	142.722	-1.33586	0.255082	5.23694	1.63e-07	2.17e-06
PMO002568	ARH	23.4773	1.21913	0.304758	-3.99137	6.57e-05	0.000442034
PMO002569	SELN	26.5452	1.30508	0.334037	-3.90261	9.52e-05	0.000606962
PMO002570	MFR1L	336.144	-1.36253	0.263758	5.16563	2.4e-07	3.07e-06
PMO002571	EXT1C	127.475	1.27007	0.375075	-3.38563	0.000710138	0.00330393
PMO002573	F110D	76.8332	2.49677	0.525315	-4.75158	2.02e-06	2.06e-05
PMO002576	CEP85	1612.64	-1.14161	0.37894	3.01203	0.00259505	0.00976947
PMO002579	ARI1A	160.141	1.24497	0.334558	-3.72011	0.000199138	0.00114146
PMO002585	ZMYNB	16.8775	1.06143	0.356027	-2.97709	0.00290996	0.0106929
PMO002597	TINAL	772.523	1.07655	0.440855	-2.44286	0.0145716	0.0398419
PMO002599	MACF1	1232.2	1.7193	0.457484	-3.76118	0.000169116	0.00099326
PMO002607	NFYC	226.044	1.33912	0.240091	-5.57673	2.45e-08	3.89e-07
PMO002608	DLGP3	1.55744	1.78519	0.687384	-2.55594	0.0105902	0.0307368
PMO002613	AFF1	79.9539	1.24692	0.439589	-2.83461	0.00458812	0.0156162
PMO002618	CSN4	403.098	-1.04371	0.265533	3.93061	8.47e-05	0.000548737
PMO002621	ENOPH	39.7988	1.53914	0.323331	-4.75067	2.03e-06	2.06e-05
PMO002625	IF4E	35.5802	-0.919838	0.295452	3.11428	0.00184392	0.00729801
PMO002626	ADH1	31.3097	-3.71026	0.400101	9.1714	4.67e-20	3.56e-18
PMO002627	CJ071	12.0033	-2.16242	0.722233	2.99882	0.00271031	0.0101218
PMO002628	LTOR3	24.3279	-1.48336	0.356452	4.16272	3.14e-05	0.000232907
PMO002630	H2AZ	440.331	3.06009	0.341718	-8.9521	3.49e-19	2.5e-17
PMO002636	S20A2	285.189	1.36121	0.473904	-2.87407	0.00405219	0.0140883
PMO002637	SMI19	8.81065	-5.47867	0.612726	8.86325	7.77e-19	5.28e-17
PMO002639	YTDC1	138.781	0.61126	0.237048	-2.57834	0.00992751	0.0291673
PMO002640	ALPK1	27.0672	1.20054	0.456105	-2.62711	0.00861135	0.0260269
PMO002641	PARM1	236.188	1.51268	0.364407	-4.15074	3.31e-05	0.000243555
PMO002642	VTDB	11.1453	-1.70613	0.540846	3.14585	0.00165603	0.00668253
PMO002643	T2EB	32.3398	-0.798015	0.307932	2.59259	0.0095255	0.0282384
PMO002645	TM10A	26.714	0.870222	0.333025	-2.61373	0.00895589	0.0268524
PMO002649	TECRL	48.1384	2.56595	0.683819	-3.82836	0.000128998	0.000792512
PMO002650	FA13A	232.975	-2.5578	0.405702	6.29877	3e-10	6.73e-09
PMO002657	AP1AR	5.48348	1.94523	0.460676	-4.11671	3.84e-05	0.000276268
PMO002658	HHIP	1.25178	1.81547	0.738088	-2.46108	0.0138519	0.0382417
PMO002659	LSM6	4.55522	-2.40454	0.558842	4.22951	2.34e-05	0.000180304
PMO002661	SH24A	2.17893	-2.5444	0.67692	3.66329	0.000248998	0.00138795
PMO002662	INT10	131.485	-0.781112	0.280406	2.7859	0.00533798	0.0176237
PMO002663	HPGDS	29.9744	2.58774	0.397466	-6.46494	1.01e-10	2.46e-09
PMO002667	CASP6	4.69629	2.90505	0.561276	-4.84895	1.24e-06	1.34e-05
PMO002674	SDCG8	6.5888	1.04661	0.4286	-2.42867	0.0151544	0.0410982
PMO002676		2.41927	2.15897	0.659574	-3.17452	0.00150084	0.00616744
PMO002678	RM14	104.206	-8.11602	0.494105	13.649	2.05e-42	1.03e-39
PMO002685	GSC1L	63.6195	1.44774	0.489837	-2.95206	0.00315665	0.0114278
PMO002689	RD3	115.754	2.2187	0.433751	-5.10841	3.25e-07	4.03e-06
PMO002691	NEK2	3.69405	3.25525	0.633916	-4.86257	1.16e-06	1.26e-05
PMO002693	TM206	95.0324	-0.706542	0.220146	3.20966	0.00132893	0.00561927
PMO002694	NSL1	18.748	1.08863	0.298316	-3.64286	0.000269631	0.0014841
PMO002695	ANGE2	99.878	-0.727032	0.290765	2.50083	0.0123902	0.0349772
PMO002696	BATF3	1.35913	-2.21398	0.749378	2.89728	0.00376418	0.01324
PMO002697	PTN14	47.1349	1.58386	0.463166	-3.41132	0.000646495	0.00307582
PMO002699	MOCS1	129.887	2.60322	0.398003	-6.52613	6.75e-11	1.7e-09
PMO002700	RHOQ	18.8571	-0.883445	0.34455	2.56409	0.0103446	0.0301487
PMO002704	ZNT6	20.4702	-1.32886	0.470066	2.82769	0.00468852	0.0158911
PMO002706	S35B2	48.8202	-1.14517	0.309682	3.69787	0.000217414	0.00123213
PMO002710	EPAS1	848.12	1.63996	0.421918	-3.88849	0.00010087	0.000638337
PMO002712	MTA3	16.086	-2.52281	0.410333	6.1212	9.29e-10	1.91e-08
PMO002714	ST65G	9.52681	1.54575	0.42619	-3.59764	0.000321112	0.00171455
PMO002716	MDGA1	4.32484	2.83876	0.641202	-4.2326	2.31e-05	0.000178019
PMO002720	EMAL4	29.0835	1.3071	0.363905	-3.58193	0.000341062	0.00180451
PMO002722	ERR3	62.5503	1.58363	0.439805	-3.59595	0.000323213	0.00172315
PMO002725	KPCD3	41.6566	1.23654	0.457632	-2.69615	0.00701451	0.0219639
PMO002726	GPTC2	5.20594	1.17804	0.481606	-2.43714	0.0148038	0.0403509
PMO002731	SCPDL	154.887	0.974786	0.209491	-4.65246	3.28e-06	3.2e-05
PMO002732	CNST	41.5902	1.24556	0.352464	-3.52715	0.000420054	0.00215221
PMO002733	SMDC1	10.6201	1.62379	0.522378	-3.08237	0.00205359	0.0080074
PMO002743	COA3	100.929	-1.49034	0.47766	3.11743	0.00182433	0.00723038
PMO002751	KCNH4	43.1227	-4.88812	0.516027	9.19356	3.8e-20	2.94e-18
PMO002757	Z385C	1.52611	3.53549	0.688183	-3.14333	0.00167038	0.00673269
PMO002758	DNJC7	416.247	-0.646699	0.268464	2.40895	0.0159985	0.0429402
PMO002763	TRAK1	1.28755	1.97336	0.717966	-2.75592	0.00585276	0.018993
PMO002764	K1C14	2.65329	2.22535	0.674389	-3.32457	0.000885553	0.00396481
PMO002774	MED24	214.632	-0.928998	0.289959	3.20408	0.00135493	0.00569989
PMO002775	LRC3B	17.7145	3.26959	0.585436	-5.42263	5.87e-08	8.51e-07
PMO002776	MIEN1	52.5618	5.94098	0.554719	-9.30611	1.33e-20	1.08e-18
PMO002780	CACB1	258.085	1.63316	0.469851	-3.47784	0.000505479	0.00250896
PMO002781	PLDX1	49.3973	1.62763	0.483394	-3.36223	0.000773148	0.00354536
PMO002786	BRCA1	8.66889	2.1257	0.427761	-4.877	1.08e-06	1.18e-05
PMO002790	BECN1	269.559	-1.43018	0.257382	5.55643	2.75e-08	4.26e-07
PMO002792	STA5B	775.137	-1.23937	0.271536	4.564	5.02e-06	4.67e-05
PMO002801	PGAP3	31.8777	1.05403	0.374461	-2.8151	0.00487625	0.0163849
PMO002812	DACH2	5.39852	1.73305	0.617891	-2.74488	0.00605325	0.0195053
PMO002818	SH3L1	1.55145	2.25624	0.701982	-3.19275	0.00140923	0.0058722
PMO002824	DGAT2	174.372	5.40141	0.421099	-12.5399	4.51e-36	1.44e-33
PMO002828	ANDR	18.4585	1.18459	0.483066	-2.44441	0.014509	0.0397016
PMO002830	HEPH	174.703	-2.02349	0.404975	4.99319	5.94e-07	6.94e-06
PMO002834	ZN711	79.2372	0.844714	0.289814	-2.91323	0.00357712	0.0126966
PMO002835	ARHG6	84.5543	2.21742	0.315668	-7.00987	2.39e-12	7.65e-11
PMO002838	DACH2	14.1341	1.32677	0.430193	-3.07347	0.00211583	0.00820753
PMO002842	FHL1	123.742	1.70256	0.422136	-4.03196	5.53e-05	0.000383219
PMO002844	MOES	240.388	1.19467	0.50809	-2.35269	0.018638	0.0483597
PMO002845	F155B	8.90312	1.43628	0.465865	-3.06911	0.00214694	0.00829701
PMO002849	DIAP2	579.949	-2.67506	0.264266	10.1204	4.49e-24	4.77e-22
PMO002851	GP174	11.6887	3.85202	0.657406	-5.49514	3.9e-08	5.93e-07
PMO002854	SL9A6	18.7095	0.850431	0.330524	-2.56633	0.0102781	0.029994
PMO002856	AR13A	4.46253	3.30686	0.648911	-4.88287	1.05e-06	1.15e-05
PMO002857	CSTF2	91.4436	-0.717974	0.242636	2.95908	0.00308558	0.0112337
PMO002861	GPR83	6.19759	-2.68023	0.60999	4.33356	1.47e-05	0.000120067
PMO002862	STA13	375.837	1.23717	0.298603	-4.14262	3.43e-05	0.000250595
PMO002866	DTBP1	25.3372	2.01449	0.382328	-5.24981	1.52e-07	2.04e-06
PMO002872	PP13G	2.53921	2.48831	0.642269	-3.72998	0.000191498	0.00110308
PMO002874	LY86	12.3641	1.09306	0.440504	-2.47295	0.0134001	0.0372447
PMO002885	MCUR1	27.7973	3.27026	0.419846	-7.64419	2.1e-14	8.54e-13
PMO002896	NFAC1	221.71	1.85452	0.553958	-3.35589	0.0007911	0.00361351
PMO002898	GRHPR	15.7811	-1.19382	0.410655	2.90991	0.00361529	0.0128127
PMO002900	GRHPR	49.588	-2.25214	0.355164	6.33589	2.36e-10	5.41e-09
PMO002902	BRD9	104.203	-1.87723	0.290455	6.46211	1.03e-10	2.5e-09
PMO002917	RBFA	96.9744	0.943643	0.31629	-2.98351	0.00284966	0.0105338
PMO002920	RIOK1	77.8269	-1.35029	0.371695	3.63322	0.000279908	0.00152709
PMO002931	RL9	567.161	1.87542	0.274175	-6.84012	7.91e-12	2.29e-10
PMO002932	RELL1	25.6582	1.40933	0.335427	-4.19016	2.79e-05	0.000209548
PMO002937	UGDH	29.3286	-1.07173	0.336494	3.18412	0.00145195	0.00601016
PMO002939	PRGC1	65.8403	1.81635	0.640564	-2.85005	0.00437129	0.0150289
PMO002940	DHPR	31.0142	0.71766	0.289001	-2.4814	0.0130867	0.0365221
PMO002941	LDB2	25.307	1.26848	0.394425	-3.2067	0.00134267	0.00566344
PMO002943	TLR6	15.5216	-2.59034	0.366933	7.00824	2.41e-12	7.72e-11
PMO002960	BD1L1	151.265	5.44086	0.393222	-13.449	3.12e-41	1.37e-38
PMO002966	RHG07	46.487	1.31606	0.440647	-2.9809	0.00287399	0.010594
PMO002971	APBB2	15.6046	1.5565	0.504101	-3.0658	0.0021709	0.00837483
PMO002973	VGFR2	239.147	1.12316	0.429056	-2.61783	0.00884912	0.0266004
PMO002980	KCTD8	7.41986	1.96033	0.527166	-3.65469	0.00025749	0.00142773
PMO002984	F184B	19.4202	2.16369	0.497392	-4.3258	1.52e-05	0.000123986
PMO002990	RFIP5	154.432	1.42766	0.412236	-3.46286	0.000534459	0.00262221
PMO002994	CT027	31.7973	1.85771	0.429546	-4.31642	1.59e-05	0.000128377
PMO002995	SN	23.8734	1.43162	0.482865	-2.95732	0.00310326	0.0112811
PMO002999	NAGK	26.7415	1.30837	0.41914	-3.11812	0.00182011	0.00722008
PMO003000	ZN638	194.28	1.5028	0.405184	-3.70816	0.000208775	0.00119092
PMO003011	DBNL	51.1589	5.67474	0.59404	-8.61656	6.9e-18	4.32e-16
PMO003012	IN80B	84.5656	1.14524	0.398255	-2.87458	0.00404567	0.0140749
PMO003017	HTRA2	108.677	-1.66063	0.306918	5.40913	6.33e-08	9.14e-07
PMO003019	DDRGK	34.9482	-1.13512	0.453829	2.50316	0.012309	0.0348132
PMO003020	N4BP3	6.5739	1.37524	0.52894	-2.56362	0.0103586	0.030181
PMO003021	FAKD5	145.914	1.43103	0.360256	-3.97211	7.12e-05	0.000475409
PMO003026	SMOX	285.843	-0.918354	0.37527	2.44681	0.0144126	0.0395304
PMO003034	EXC6B	42.9228	1.97801	0.414436	-4.75556	1.98e-06	2.03e-05
PMO003040	D39U1	66.126	-7.95076	0.526087	13.7869	3.06e-43	1.61e-40
PMO003047	RL27	1297.7	1.56521	0.414199	-3.78076	0.000156352	0.000932793
PMO003048	RUND1	151.795	-0.597468	0.233246	2.56172	0.0104156	0.0303304
PMO003050	AOC3	53.1443	1.70292	0.421374	-4.03697	5.41e-05	0.000375876
PMO003052	WNK4	635.684	1.24633	0.472824	-2.63777	0.00834536	0.0253834
PMO003054	RAMP2	185.284	1.20765	0.437174	-2.76343	0.00571975	0.0186535
PMO003056	TBG1	298.108	-1.10611	0.195365	5.66171	1.5e-08	2.46e-07
PMO003058	COASY	187.664	1.26989	0.28766	-4.41415	1.01e-05	8.67e-05
PMO003061	CN37	23.2445	1.25798	0.436631	-2.87828	0.00399848	0.013943
PMO003063	FKB10	9.02958	2.89998	0.432035	-4.35158	1.35e-05	0.000111912
PMO003071	PSMD3	937.704	-2.37241	0.339971	6.97623	3.03e-12	9.53e-11
PMO003072	ORML3	30.9536	1.01735	0.402466	-2.52224	0.0116612	0.0333302
PMO003075	PNMT	2.67589	-1.46478	0.609884	2.38202	0.0172179	0.045357
PMO003076	PPR1B	0.914616	-1.80305	0.75229	2.36481	0.0180391	0.0471192
PMO003077	CDK12	269.182	-1.15214	0.16393	7.028	2.1e-12	6.74e-11
PMO003080	IN35	83.8774	-0.955442	0.361096	2.64612	0.0081422	0.0248805
PMO003083	LASP1	65.3057	2.12655	0.358445	-5.92316	3.16e-09	5.94e-08
PMO003084	GSDMA	0.883919	-2.11252	0.746704	2.79791	0.00514344	0.0171242
PMO003091	CNTD1	8.33389	1.85579	0.524095	-3.50337	0.000459418	0.00231225
PMO003093	RL19	667.868	-1.02382	0.324043	3.15926	0.00158171	0.00644439
PMO003098	F167A	14.3385	1.44127	0.555829	-2.58045	0.00986704	0.0290382
PMO003103	TPPC3	44.8784	-1.01276	0.282256	3.5894	0.000331445	0.00176257
PMO003105	LSM10	12.0134	0.985035	0.399187	-2.46391	0.0137432	0.0380014
PMO003106	RT15	209.41	-3.25935	0.639869	5.09725	3.45e-07	4.25e-06
PMO003108	EAF6	80.7648	1.08575	0.28161	-3.85484	0.000115804	0.000721135
PMO003109	SNIP1	182.714	4.28277	0.479831	-8.88993	6.11e-19	4.18e-17
PMO003110	NOG2	309.84	-1.06572	0.293505	3.63094	0.000282391	0.00153824
PMO003113	I5P2	78.5033	1.40895	0.271161	-5.19343	2.06e-07	2.69e-06
PMO003118	MYCBP	43.3891	-5.21893	0.378615	13.2082	7.87e-40	3.19e-37
PMO003121	XKR8	31.2197	-2.8842	0.367041	7.82544	5.06e-15	2.34e-13
PMO003122	CITE3	12.0567	1.73469	0.549663	-3.1489	0.00163885	0.00662847
PMO003125	SERC2	37.9912	1.32211	0.439658	-3.00474	0.00265808	0.00995859
PMO003127	PTPRU	54.2679	1.60376	0.447055	-3.58002	0.000343568	0.00181512
PMO003129	41	228.322	1.39292	0.468172	-2.9761	0.00291943	0.0107202
PMO003130	TAF12	21.1144	1.07978	0.362147	-2.98208	0.00286299	0.0105608
PMO003132	PSB2	431.525	-1.13385	0.315999	3.58791	0.000333338	0.00176988
PMO003133	STK40	116.998	-1.23988	0.279667	4.43323	9.28e-06	8.02e-05
PMO003137	STX12	80.9176	1.30444	0.264597	-4.92859	8.28e-07	9.33e-06
PMO003140	ZEP3	30.9983	1.76555	0.391999	-4.48537	7.28e-06	6.48e-05
PMO003142	ATIF1	1559.91	-3.46239	0.385299	8.98106	2.68e-19	1.93e-17
PMO003143	CTGF	3.70478	2.95602	0.693629	-4.09886	4.15e-05	0.000296229
PMO003144	AIFM1	427.132	-1.28881	0.290001	4.44395	8.83e-06	7.67e-05
PMO003145	TMG3	5.67365	1.7171	0.501351	-3.3655	0.00076405	0.00351282
PMO003159	RRAGA	487.062	-1.6473	0.285309	5.77319	7.78e-09	1.34e-07
PMO003165	RPAC2	14.0999	-4.46523	0.562116	7.37977	1.59e-13	5.94e-12
PMO003167	TNF10	48.2037	0.906197	0.322548	-2.80712	0.00499865	0.0167268
PMO003168	ZDHC9	46.3388	-0.739723	0.255248	2.89782	0.00375769	0.0132216
PMO003172	HDAC8	112.587	-0.732144	0.277266	2.64096	0.00826722	0.0251894
PMO003174	MAGT1	324.748	2.89459	0.326474	-8.86067	7.95e-19	5.37e-17
PMO003177	TMLH	213.522	-1.32514	0.295473	4.48441	7.31e-06	6.5e-05
PMO003180	SLAIL	1.229	2.17363	0.681674	-3.13946	0.00169261	0.00680927
PMO003184	RF12A	1320.41	-2.50686	0.219186	11.4362	2.76e-30	4.84e-28
PMO003195	GBRL2	25.3119	2.30537	0.352992	-6.49552	8.27e-11	2.05e-09
PMO003198	ATX1L	113.326	1.13881	0.467567	-2.43475	0.0149021	0.0405559
PMO003203	NOB1	97.2072	0.809575	0.270559	-2.99219	0.00276983	0.0103039
PMO003209	VP9D1	24.0009	1.88516	0.421314	-4.45536	8.38e-06	7.33e-05
PMO003212	ST2B1	195.159	1.00774	0.381004	-2.64508	0.00816712	0.0249494
PMO003215	MTG16	70.8677	1.17762	0.456709	-2.57792	0.00993966	0.0291948
PMO003218	PIEZ1	632.081	-0.981128	0.338332	2.89954	0.00373711	0.0131757
PMO003219	MVD1	143.585	-1.0498	0.411348	2.55123	0.0107343	0.0310523
PMO003223	FBX31	652.668	-2.09228	0.420721	4.97005	6.69e-07	7.72e-06
PMO003227	K0513	99.2692	-5.29883	0.417199	12.4809	9.49e-36	2.94e-33
PMO003230	KLDC4	42.8392	-0.885182	0.371627	2.38295	0.0171747	0.0452886
PMO003231	CY24A	39.6005	1.48516	0.350037	-4.2389	2.25e-05	0.000174067
PMO003233	FANCA	1.23357	-2.26143	0.707771	3.22371	0.00126541	0.00539158
PMO003235	RSPH1	1.08698	-2.03092	0.717529	2.86378	0.00418618	0.0145062
PMO003239	IGSF5	1.0644	-1.92838	0.732865	2.64458	0.00817922	0.0249719
PMO003240	SH3BG	54.9977	-3.45263	0.349603	9.8363	7.85e-23	7.65e-21
PMO003241	ETS2	24.8258	-0.95749	0.342976	2.7919	0.00523988	0.0173801
PMO003245	WDR4	60.5634	-1.92879	0.353494	5.45459	4.91e-08	7.25e-07
PMO003248	HSF2B	8.15068	-2.13464	0.443106	2.54977	0.0107793	0.0311565
PMO003252	RENR	184.676	0.987106	0.354925	-2.78106	0.00541814	0.0178095
PMO003257	XK	6.43901	2.0267	0.517112	-3.82458	0.000130996	0.00080338
PMO003265	TTC3	95.318	0.702329	0.269698	-2.60323	0.00923488	0.0275242
PMO003266	DOP2	63.0335	1.2467	0.414773	-3.00242	0.00267845	0.0100278
PMO003269	WRB	20.2711	1.91575	0.359556	-5.3044	1.13e-07	1.56e-06
PMO003270	B3GT5	2.95845	2.60358	0.709002	-3.55401	0.000379411	0.00196405
PMO003271	CBS	3.82424	-1.87838	0.574555	3.24231	0.00118564	0.00510545
PMO003273	TSN7	89.8595	-2.001	0.404471	4.94393	7.66e-07	8.72e-06
PMO003274	NYX	29.6751	1.57826	0.518839	-3.04188	0.00235103	0.00897801
PMO003279	CAF1B	21.1939	-1.28824	0.404972	3.18328	0.00145615	0.00601904
PMO003283		4.26753	3.94854	0.636591	-6.07584	1.23e-09	2.49e-08
PMO003286	FANCF	16.3994	1.21701	0.427294	-2.84422	0.00445205	0.0152567
PMO003289	LIPB2	13.3356	1.62206	0.366923	-4.39296	1.12e-05	9.48e-05
PMO003293	T11L1	114.686	-2.6113	0.488066	5.34255	9.16e-08	1.29e-06
PMO003300	MET15	39.0291	-0.85143	0.333056	2.55711	0.0105546	0.0306418
PMO003301	KCNA4	10.9111	-4.89025	0.602157	7.58061	3.44e-14	1.38e-12
PMO003308	GOGB1	866.174	0.913134	0.2783	-3.28121	0.00103362	0.00453055
PMO003311	MPPD2	9.1593	1.10911	0.452731	-2.44442	0.0145085	0.0397016
PMO003312	KI18A	10.9352	-3.71954	0.569405	6.27609	3.47e-10	7.71e-09
PMO003313	RBTN2	422.093	3.30705	0.474151	-6.98287	2.89e-12	9.14e-11
PMO003316	DHCR7	15.9942	1.46525	0.459272	-3.18075	0.00146896	0.00606105
PMO003319	BTBDA	154.74	-1.03272	0.309707	3.3345	0.000854538	0.00384323
PMO003325	FBX3	269.706	1.46074	0.408773	-3.57444	0.000350977	0.00184961
PMO003329	HIPK3	370.347	1.27114	0.543599	-2.34153	0.0192047	0.0495611
PMO003331	FRS1L	4.17292	-3.03104	0.607046	4.75091	2.02e-06	2.06e-05
PMO003336	ZN830	124.186	-1.43186	0.268877	5.32564	1.01e-07	1.41e-06
PMO003339	FUMH	2264.51	-0.633538	0.259385	2.44242	0.0145893	0.0398592
PMO003347	MSD3	15.1178	2.20118	0.39098	-5.56725	2.59e-08	4.04e-07
PMO003352	LR16A	128.658	1.63233	0.37021	-4.40621	1.05e-05	8.98e-05
PMO003354	ZN236	37.4699	2.815	0.399967	-6.96359	3.32e-12	1.03e-10
PMO003355	TSH1	12.755	1.32771	0.419063	-3.15045	0.00163018	0.00660865
PMO003366	CLP1L	34.4681	0.760457	0.309045	-2.46007	0.0138909	0.0383293
PMO003367	STX17	17.5616	0.726588	0.309887	-2.34319	0.0191199	0.0494028
PMO003373	TERT	17.3944	1.54611	0.562934	-2.73816	0.00617832	0.0198113
PMO003376	F206A	8.75745	2.29047	0.534097	-4.21271	2.52e-05	0.000192429
PMO003378	PCAT1	14.2992	2.92455	0.453667	-6.26537	3.72e-10	8.24e-09
PMO003387	TOR3A	29.7304	1.23864	0.403969	-3.05856	0.00222406	0.00854857
PMO003392	QSOX1	37.467	1.54034	0.488692	-3.15294	0.00161636	0.00656018
PMO003396	IER5	72.0505	2.7269	0.564906	-4.82438	1.4e-06	1.49e-05
PMO003397	RGSL	10.0335	-3.21725	0.500215	6.27698	3.45e-10	7.68e-09
PMO003402	NTM1B	11.5984	2.69117	0.600343	-4.37576	1.21e-05	0.00010172
PMO003405	ITPA	110.351	-0.960117	0.338867	2.83303	0.00461096	0.0156737
PMO003408	TMCO1	83.9624	-2.58236	0.324917	7.9412	2e-15	9.62e-14
PMO003410	CA112	19.3782	-3.28391	0.384956	8.43147	3.41e-17	2.03e-15
PMO003412	RBG1L	52.0904	0.988837	0.263604	-3.74877	0.000177703	0.00103724
PMO003422	FMO1	1.62331	2.27427	0.7364	-3.1131	0.00185131	0.0073245
PMO003423	SUCO	290.33	-0.988977	0.31243	3.16513	0.00155014	0.00634527
PMO003427	XPR1	240.349	-1.27248	0.272106	4.67641	2.92e-06	2.88e-05
PMO003432	TRIM7	37.6291	1.74424	0.531103	-3.28227	0.00102975	0.00451921
PMO003436	KCNV2	3.90845	2.6385	0.574183	-4.34833	1.37e-05	0.000113243
PMO003441	CATIN	274.555	-1.26124	0.299997	4.20391	2.62e-05	0.000199054
PMO003442	TA2R	12.3443	1.30569	0.463104	-2.81087	0.00494072	0.0165646
PMO003448	UN13A	58.168	-1.30166	0.460181	2.82673	0.00470265	0.0159288
PMO003450	RORB	12.0112	1.66818	0.548861	-3.01705	0.00255251	0.00962473
PMO003452	MIS	3.24418	1.52229	0.618878	-2.4025	0.0162833	0.0435492
PMO003456	C2C4A	2.39074	2.72551	0.723244	-3.7917	0.000149619	0.000897202
PMO003462	KLH24	41.6693	2.89717	0.440924	-6.52069	7e-11	1.75e-09
PMO003464	OAZ1	733.46	-0.836715	0.302267	2.76804	0.00563949	0.0184312
PMO003466	PI51C	92.5259	1.14694	0.29133	-3.93589	8.29e-05	0.000539096
PMO003473	ATG4B	42.8325	-0.662377	0.24353	2.72006	0.00652703	0.0207211
PMO003475	G3ST2	1.99587	1.92709	0.698914	-2.72899	0.00635285	0.0202782
PMO003477	FBSP1	19.3596	-1.14169	0.344504	3.31382	0.000920291	0.00410652
PMO003480	AQ12B	3.22372	-1.5318	0.638294	2.39013	0.0168425	0.0446364
PMO003485	MTEF4	42.5208	-0.833716	0.332289	2.50931	0.0120966	0.0343678
PMO003489	SFT2C	6.32463	1.46631	0.513242	-2.82405	0.00474207	0.0160416
PMO003490	F168B	45.8177	0.80897	0.330178	-2.44746	0.0143867	0.03948
PMO003493	SIAT1	13.769	-0.917901	0.342621	2.68031	0.00735544	0.0228614
PMO003502	RT22	272.107	-0.608058	0.246124	2.47059	0.013489	0.0374264
PMO003514	ETV5	25.1759	-2.32158	0.337464	6.86056	6.86e-12	2.01e-10
PMO003515	PAK2	44.896	0.909481	0.345971	-2.62531	0.00865707	0.0261299
PMO003519	ZN292	20.8321	2.27663	0.440817	-5.10457	3.32e-07	4.1e-06
PMO003522	AR13B	9.18937	4.70124	0.582967	-7.51714	5.6e-14	2.2e-12
PMO003523	NSUN4	27.633	-1.81343	0.431637	4.19734	2.7e-05	0.000204472
PMO003527	CREG1	487.906	2.6118	0.417669	-6.25654	3.94e-10	8.68e-09
PMO003531	FPRP	12.3865	1.54913	0.558136	-2.75091	0.00594293	0.0192028
PMO003535	VGLL3	10.9302	1.5593	0.413734	-3.74475	0.000180577	0.00105168
PMO003536	GLGB	222.712	-1.71786	0.46261	3.71036	0.000206962	0.00118309
PMO003546	IGSF3	16.2744	1.94259	0.503318	-3.82774	0.000129327	0.000794069
PMO003551	CRBG3	108.157	2.00353	0.299511	-6.68017	2.39e-11	6.44e-10
PMO003552	GPHR	17.2326	-1.01026	0.341549	2.95921	0.00308429	0.0112337
PMO003560	NIP7	85.8535	-1.38542	0.368762	3.75572	0.000172842	0.00101167
PMO003562	CIR1A	161.208	-1.05793	0.314406	3.36457	0.000766642	0.0035232
PMO003563	CADH1	49.4125	-6.00073	0.506135	10.8254	2.61e-27	3.52e-25
PMO003566	DEFI8	51.8716	-1.12912	0.338021	3.34031	0.000836859	0.00378057
PMO003574	CDT1	15.4988	-1.20551	0.367324	3.27935	0.00104047	0.00455488
PMO003575	FOG1	73.0499	2.24538	0.503504	-4.45341	8.45e-06	7.38e-05
PMO003577	JPH3	1.84703	2.42698	0.682234	-3.55902	0.000372246	0.00193458
PMO003581	TM231	3.07193	1.30209	0.537846	-2.38045	0.0172917	0.0454717
PMO003585	ZFHX3	99.5205	1.13501	0.34573	-3.28059	0.0010359	0.00453864
PMO003587	NFAT5	57.8506	1.07956	0.452084	-2.38505	0.0170767	0.0450979
PMO003592	BANP	26.1925	0.807861	0.30941	-2.60821	0.0091016	0.0271808
PMO003597	PARVA	5.24306	2.1125	0.531926	-3.84393	0.000121078	0.000750429
PMO003601	ZDH13	11.4035	2.12959	0.443336	-4.75192	2.01e-06	2.06e-05
PMO003614	LUZP2	6.92098	-1.13493	0.452653	2.50865	0.0121193	0.034397
PMO003623	ANO1	3.45887	1.56358	0.568916	-2.67679	0.00743308	0.0230347
PMO003627	ANO5	60.6011	1.29455	0.430744	-3.00067	0.00269384	0.0100782
PMO003628	NAT10	145.788	-0.85279	0.281004	3.03511	0.0024045	0.00913865
PMO003638	RAMP1	130.855	1.18224	0.411326	-2.87439	0.00404806	0.0140786
PMO003647	NUP53	17.0203	2.63571	0.429581	-6.04966	1.45e-09	2.89e-08
PMO003652	ZC3HF	500.608	-0.94134	0.302912	3.10757	0.00188631	0.0074462
PMO003654	ASND1	191.348	-1.4734	0.303085	4.86125	1.17e-06	1.26e-05
PMO003656	GLSL	23.4332	1.25607	0.46638	-2.68314	0.0072934	0.0226954
PMO003663	MYO1B	17.4862	1.50053	0.413578	-3.60797	0.000308602	0.0016638
PMO003665	SOSB2	44.8793	-1.21489	0.336075	3.61485	0.000300526	0.00162525
PMO003671	WDR75	71.1846	-2.17763	0.268213	8.11461	4.87e-16	2.54e-14
PMO003673	BARD1	2.65427	2.21071	0.682817	-3.14923	0.00163701	0.00662612
PMO003674	NB5R3	94.2772	1.35176	0.265959	-5.07917	3.79e-07	4.62e-06
PMO003675	PACN2	109.785	0.943449	0.330345	-2.85529	0.00429969	0.0148255
PMO003683	ARHG5	13.9611	1.51295	0.399008	-3.76855	0.000164196	0.000970783
PMO003687	TTLL1	11.8158	-1.15066	0.42164	2.73078	0.00631843	0.0202051
PMO003692	A4GAT	5.74165	3.8807	0.643666	-5.79417	6.87e-09	1.2e-07
PMO003693	LIPB1	165.668	0.745795	0.286975	-2.59859	0.00936068	0.0278208
PMO003695	KCNJ8	43.8216	0.934362	0.349226	-2.67267	0.00752494	0.0232919
PMO003704	ANO2	3.62968	2.2044	0.641533	-3.37359	0.000741942	0.00343067
PMO003708	LRMP	2.23013	2.66157	0.724943	-3.69187	0.00022261	0.00125886
PMO003717	TPC12	170.051	-0.610933	0.229949	2.657	0.00788399	0.0241898
PMO003719	COL11	4.60305	1.34045	0.550191	-2.41573	0.0157039	0.042268
PMO003722	ID2	21.5906	1.425	0.414078	-3.42974	0.000604162	0.00289799
PMO003724	IAH1	74.1875	-1.10619	0.301955	3.66407	0.000248243	0.00138448
PMO003731	VATC2	1.33806	1.67183	0.708524	-2.42713	0.015219	0.0412476
PMO003735	ASAP2	4.62587	1.50535	0.535266	-2.75739	0.00582651	0.0189371
PMO003742	TANC2	21.6558	1.51203	0.494144	-3.04292	0.00234297	0.00895684
PMO003743	ACE	56.5413	-1.7264	0.400587	4.30737	1.65e-05	0.00013272
PMO003747	DDX42	85.8424	0.834778	0.270415	-3.08552	0.00203197	0.00793781
PMO003751	B3AT	1613.42	2.09915	0.493399	-4.26171	2.03e-05	0.000158854
PMO003754	LSM12	34.9966	-1.06566	0.289048	3.68763	0.00022635	0.00127864
PMO003758	RETST	3.94485	3.27639	0.712713	-4.5998	4.23e-06	4e-05
PMO003759	NEB2	90.9297	-1.65241	0.345105	4.78704	1.69e-06	1.77e-05
PMO003768	UBE2Z	52.3945	-2.52076	0.321002	7.83905	4.54e-15	2.11e-13
PMO003771	PHOP1	71.5217	-1.06282	0.359993	2.95262	0.00315092	0.011411
PMO003774	SPOP	71.2572	-0.773673	0.265954	2.90928	0.00362259	0.0128278
PMO003780	LCAP	219.343	-0.818734	0.338023	2.42201	0.0154349	0.0416824
PMO003782	TIKI1	1.72738	-2.26366	0.739949	3.10415	0.00190824	0.00751302
PMO003784	ACHB3	1.98401	2.31537	0.659628	-3.48189	0.000497884	0.00247391
PMO003786	RN170	12.1302	-1.31252	0.406335	3.22418	0.00126333	0.00538708
PMO003788	KCMF1	382.028	-2.09764	0.353287	5.93596	2.92e-09	5.5e-08
PMO003793	SEBP2	213.431	-1.25559	0.332258	3.77874	0.000157626	0.000938796
PMO003796	GLCNE	10.0044	1.70094	0.421755	-3.99456	6.48e-05	0.000436682
PMO003799	LIPL	509.784	1.04942	0.426128	-2.46327	0.0137677	0.0380392
PMO003800	PIGG	24.5183	-0.96304	0.277903	3.46562	0.000529012	0.00260156
PMO003801	IDUA	117.935	1.34153	0.446265	-3.00478	0.0026577	0.00995859
PMO003802	FNTA	121.12	-0.750883	0.283461	2.64916	0.0080691	0.0246858
PMO003805	SPINW	13.9328	1.21369	0.352505	-3.43022	0.000603103	0.00289688
PMO003807	GA45G	120.995	-1.24464	0.508544	2.44558	0.0144619	0.0396242
PMO003813	NCF2	5.01924	-1.40565	0.495591	2.83003	0.00465443	0.0157858
PMO003816	NIBAN	31.1163	3.02535	0.415519	-7.1718	7.4e-13	2.51e-11
PMO003817	TRM1L	29.598	-1.65913	0.277888	5.96706	2.42e-09	4.63e-08
PMO003818	TPR	325.629	-1.26107	0.244269	5.16254	2.44e-07	3.12e-06
PMO003833	CLCC1	87.7733	-0.681764	0.221411	3.07952	0.00207335	0.00806355
PMO003835	VAV3	2.30741	1.96006	0.651217	-2.88975	0.00385546	0.0135115
PMO003836	GT252	44.5828	1.92318	0.392523	-4.88694	1.02e-06	1.13e-05
PMO003841	UTP23	62.3822	-1.16017	0.261118	4.44256	8.89e-06	7.71e-05
PMO003852	TRIB1	197.706	-1.46715	0.519546	2.82108	0.00478628	0.0161393
PMO003861	ERG1	5.97106	1.92503	0.70519	-2.72845	0.00636337	0.020305
PMO003873	AMYP	46.8493	1.82945	0.447005	-4.08716	4.37e-05	0.000309053
PMO003875	GPSM2	6.25216	-1.23432	0.435088	2.83571	0.00457239	0.0155778
PMO003879	DEN1B	10.0976	1.71165	0.528255	-3.20124	0.00136837	0.00574877
PMO003888	SEN15	48.5359	-2.29005	0.297458	7.69183	1.45e-14	6.11e-13
PMO003893	B3GT2	2.64271	1.76366	0.671847	-2.61573	0.00890376	0.0267113
PMO003894	RING2	34.6752	2.18562	0.440113	-4.9419	7.74e-07	8.79e-06
PMO003901	F102B	41.2195	1.55252	0.518443	-2.98782	0.00280974	0.010445
PMO003906	KBTBB	12.2977	1.32842	0.395517	-3.34026	0.000837013	0.00378057
PMO003907	ARHGA	34.1701	2.84053	0.433753	-6.47107	9.73e-11	2.37e-09
PMO003910	SH3Y1	3.07853	1.81033	0.564615	-3.0928	0.0019828	0.0077717
PMO003916	RNH1	62.7387	-2.27457	0.272104	8.35271	6.67e-17	3.8e-15
PMO003919	ADA17	76.5433	1.06439	0.28011	-3.79694	0.000146492	0.000881464
PMO003922	DCOR	63.3611	-3.68585	0.340079	10.7858	4.02e-27	5.16e-25
PMO003923	PDIA6	183.118	0.989063	0.258681	-3.82351	0.000131564	0.000805927
PMO003925	E2F6	41.4466	1.30336	0.297404	-4.38017	1.19e-05	9.98e-05
PMO003931	MPSF	1796.12	2.19122	0.440205	-4.98228	6.28e-07	7.3e-06
PMO003932	PXDN	70.5297	1.50798	0.474063	-3.17759	0.00148507	0.00610981
PMO003935	O1030	1.32543	-2.76035	0.72579	3.76404	0.000167188	0.000985154
PMO003937	ABTB2	4.69032	2.83343	0.571642	-4.66979	3.02e-06	2.96e-05
PMO003946	CLCF1	9.392	2.26991	0.530087	-4.20241	2.64e-05	0.000200238
PMO003953	DDB1	1025.51	-0.763403	0.258011	2.95874	0.00308897	0.0112408
PMO003960	FRIH	8732.67	-1.05382	0.381262	2.76352	0.00571812	0.0186535
PMO003971	COMD4	18.4679	3.88181	0.483047	-7.56214	3.96e-14	1.57e-12
PMO003974	LIGO1	439.54	1.22307	0.489088	-2.50271	0.0123246	0.0348379
PMO003982	WDR61	35.632	-0.960328	0.313929	3.0603	0.00221116	0.00850832
PMO003989	COAC	6.80993	-1.08456	0.452818	2.39735	0.0165142	0.0440085
PMO003991	ACBG1	14.8378	1.66509	0.487391	-3.40536	0.000660759	0.00312251
PMO003994	CL045	13.8941	-2.25973	0.36938	6.09606	1.09e-09	2.22e-08
PMO003997	KCNA5	5.64697	1.85593	0.580087	-3.13214	0.00173537	0.00695759
PMO003998	ELOV4	3.72244	3.38734	0.694004	-4.85833	1.18e-06	1.28e-05
PMO004004	MPPD1	12.2728	4.42062	0.590085	-6.85335	7.21e-12	2.1e-10
PMO004006	GBRL1	61.7198	-2.1095	0.357785	5.89073	3.84e-09	7.09e-08
PMO004008	NEUA	92.9852	-2.20109	0.2488	8.84254	9.36e-19	6.23e-17
PMO004013	PLPL2	6.51078	-1.46616	0.552388	2.65033	0.00804139	0.0246225
PMO004015	PARVB	71.6087	2.77291	0.30154	-9.15482	5.44e-20	4.09e-18
PMO004018	TRXR1	5.13241	-2.60525	0.549707	4.62351	3.77e-06	3.63e-05
PMO004024	GP182	4.0177	1.65523	0.615677	-2.66498	0.00769927	0.0237407
PMO004030	NCK5L	26.6708	1.78617	0.533908	-3.33852	0.000842273	0.0037991
PMO004033	FOXJ1	1.07855	1.84025	0.70999	-2.6167	0.00887832	0.0266654
PMO004035	INHBC	5.6931	4.02259	0.66303	-5.96559	2.44e-09	4.66e-08
PMO004042	DDX23	741.782	-0.823437	0.276193	2.98133	0.00286996	0.0105829
PMO004047	LRP1	1209.84	1.46858	0.432324	-3.39859	0.000677336	0.00318249
PMO004049	RDH14	108.762	-1.12847	0.258571	4.36406	1.28e-05	0.00010672
PMO004052	WDR35	18.8777	-1.34577	0.369691	3.63612	0.000276772	0.0015139
PMO004053	SDC1	5.97944	1.35886	0.514659	-2.62829	0.00858149	0.0259516
PMO004055	H1BP3	13.7651	0.887199	0.325909	-2.71907	0.00654657	0.0207769
PMO004058	CB044	17.4688	-1.74051	0.353473	4.91819	8.74e-07	9.78e-06
PMO004060	SF3B6	30.8607	1.43148	0.45316	-3.16175	0.00156822	0.00639934
PMO004066	CD2AP	77.6299	1.19668	0.40526	-2.95059	0.00317167	0.0114703
PMO004067	LAP4A	292.533	0.799771	0.271328	-2.9476	0.00320252	0.0115462
PMO004068	ATD2B	29.8779	0.74007	0.294438	-2.51059	0.0120529	0.0342637
PMO004071	QORX	1.80975	1.66958	0.699497	-2.46344	0.0137609	0.0380305
PMO004075	TTPAL	17.9375	1.21077	0.462422	-2.60967	0.00906287	0.0270882
PMO004080	PKCB1	26.4744	1.94671	0.484463	-3.99457	6.48e-05	0.000436682
PMO004085	SNX21	57.5326	-0.791192	0.307499	2.57346	0.0100686	0.0294994
PMO004086	TDIF1	97.4034	-1.84517	0.338285	5.45341	4.94e-08	7.28e-07
PMO004087	WFDC2	10.8989	2.96842	0.529188	-5.41218	6.23e-08	9e-07
PMO004089	TGM2	179.883	-2.97559	0.369246	8.04917	8.34e-16	4.16e-14
PMO004090	PPGB	299.271	-1.07066	0.280647	3.81503	0.000136165	0.000829596
PMO004094	ZNFX1	77.2679	-1.67253	0.314756	5.31303	1.08e-07	1.49e-06
PMO004110	PLCD3	39.0006	-1.43144	0.374739	3.81795	0.000134565	0.000821918
PMO004113	PSD11	433.034	-1.40263	0.320131	4.381	1.18e-05	9.95e-05
PMO004121	U5S1	178.171	-0.92554	0.249832	3.70476	0.000211594	0.00120238
PMO004126	GRN	171.612	1.95046	0.361635	-5.39234	6.95e-08	9.97e-07
PMO004127	NUMA1	677.429	-1.07454	0.224817	4.77944	1.76e-06	1.82e-05
PMO004130	TBC23	33.0857	1.73483	0.315158	-5.48557	4.12e-08	6.22e-07
PMO004132	TM45B	4.4605	1.46194	0.600231	-2.3923	0.0167432	0.0444627
PMO004134	PCNP	37.3303	-1.84183	0.270226	6.80971	9.78e-12	2.77e-10
PMO004138	CD166	3.90924	2.56058	0.668153	-3.7242	0.000195932	0.00112431
PMO004141	FIL1L	874.851	1.39422	0.337635	-4.12979	3.63e-05	0.000262627
PMO004146	MRRP1	154.079	0.960894	0.3596	-2.67254	0.00752803	0.0232925
PMO004151	HS3S1	30.5518	1.09722	0.437872	-2.50125	0.0123754	0.0349447
PMO004154	NSG1	2.16375	-2.33899	0.722655	3.14296	0.00167248	0.00673858
PMO004167	TRM44	71.8324	-2.43777	0.366252	6.65037	2.92e-11	7.81e-10
PMO004168	K0232	301.662	1.69776	0.466755	-3.6389	0.000273806	0.00150158
PMO004169	CCL3	3.99949	3.66406	0.665422	-5.43938	5.35e-08	7.84e-07
PMO004186	MAST3	53.8261	1.38912	0.352225	-3.93758	8.23e-05	0.00053679
PMO004192	SAFB2	405.311	-1.25513	0.257255	4.87886	1.07e-06	1.17e-05
PMO004196	P85B	66.5325	1.3488	0.366927	-3.67061	0.000241971	0.00135524
PMO004201	UB2L3	2.28588	-2.05748	0.66601	3.03323	0.00241953	0.00918584
PMO004203	APJ	27.6794	1.60355	0.462055	-3.46302	0.000534151	0.00262192
PMO004205	PSD13	643.542	-3.9947	0.330705	12.0695	1.53e-33	3.66e-31
PMO004209	RM21	226.02	1.08158	0.308962	-3.5007	0.000464039	0.00233105
PMO004212	RMD3	71.0634	1.08587	0.387049	-2.80435	0.00504178	0.0168283
PMO004213	MED19	32.9044	1.9268	0.334123	-5.7481	9.02e-09	1.53e-07
PMO004214	PTSS2	233.087	-0.887933	0.328402	2.70376	0.00685607	0.0215512
PMO004217	TIM10	8.33036	1.98065	0.436413	-4.46373	8.05e-06	7.1e-05
PMO004225	PRI1	24.4017	1.95523	0.411162	-4.74031	2.13e-06	2.16e-05
PMO004226	NEMP1	17.6968	-1.05136	0.340075	3.09298	0.0019816	0.00776987
PMO004232	ACV1B	149.624	-2.53482	0.325418	7.78377	7.04e-15	3.15e-13
PMO004233	ACVL1	200.174	1.39148	0.398488	-3.49186	0.000479661	0.00239353
PMO004235	EFTS	163.29	-2.54525	0.423429	6.00498	1.91e-09	3.73e-08
PMO004238	BI1	199.456	-3.01802	0.259731	11.6113	3.61e-31	6.79e-29
PMO004243	MYO1A	7.49894	4.09447	0.685391	-5.90304	3.57e-09	6.61e-08
PMO004249	FITM2	79.9062	1.22042	0.378547	-3.2225	0.00127077	0.00541
PMO004250	OSER1	317.589	-1.95966	0.39153	5.00291	5.65e-07	6.65e-06
PMO004251	GTR10	8.42934	1.36593	0.512032	-2.65761	0.00786973	0.0241743
PMO004254	EPB42	246.07	1.59228	0.467847	-3.40579	0.000659736	0.00311907
PMO004259	CTBL1	118.395	-1.14497	0.326937	3.50243	0.000461032	0.00231815
PMO004261	RPR1B	145.247	1.1736	0.310919	-3.77326	0.00016113	0.00095642
PMO004265	NCOA5	44.5974	0.662794	0.241683	-2.74085	0.00612798	0.0196919
PMO004267	JPH2	238.398	2.43508	0.531975	-4.58562	4.53e-06	4.25e-05
PMO004268	ELMO2	313.353	-1.51155	0.294476	5.13273	2.86e-07	3.59e-06
PMO004274	CTND1	286.847	0.975182	0.35093	-2.77866	0.00545838	0.0179065
PMO004279	SSRP1	520.283	-0.855057	0.302649	2.82515	0.00472581	0.0159918
PMO004284	BET1L	2.99164	-1.33857	0.559852	2.37638	0.0174836	0.0458389
PMO004286	ZDHC5	191.948	0.682343	0.172857	-3.94702	7.91e-05	0.000519186
PMO004291	VPS51	174.56	-1.02117	0.38764	2.63383	0.00844271	0.0256276
PMO004292	SIR3	126.15	-1.32874	0.341999	3.88457	0.000102513	0.000647956
PMO004293	INCE	1.47236	2.0775	0.709578	-2.96722	0.00300509	0.0109849
PMO004295	SMBP2	124.508	-2.37139	0.362182	6.54185	6.08e-11	1.54e-09
PMO004300	NPCL1	5.31179	1.9136	0.60102	-3.12862	0.00175629	0.00702886
PMO004301	PCYOX	98.7394	-1.54982	0.305769	5.06748	4.03e-07	4.89e-06
PMO004305	STAR7	159.433	0.937016	0.271252	-3.45425	0.000551817	0.00269106
PMO004307	ANR39	22.5562	1.47798	0.57981	-2.54456	0.0109415	0.0315476
PMO004308	LMA2L	80.5142	-1.34011	0.272057	4.92544	8.42e-07	9.45e-06
PMO004309	MTDC	50.7255	1.04626	0.402697	-2.59514	0.00945526	0.028046
PMO004313	PROM2	2.68583	2.74713	0.731595	-3.78366	0.000154536	0.000924583
PMO004319	SETBP	41.854	1.06099	0.436587	-2.42863	0.015156	0.0410982
PMO004324	LIPE	26.2293	-2.80074	0.564818	4.94803	7.5e-07	8.57e-06
PMO004328	MAOM	104.831	1.98138	0.520562	-3.80737	0.000140453	0.000850275
PMO004329	RNZ1	1.7011	1.87088	0.68075	-2.63205	0.00848706	0.025732
PMO004331	CR025	26.6018	-1.15025	0.278948	4.12329	3.73e-05	0.000269407
PMO004343	AIFM2	30.6027	1.20508	0.381976	-3.1556	0.0016017	0.00651326
PMO004348	S29A3	5.25183	2.91149	0.588619	-4.61675	3.9e-06	3.73e-05
PMO004350	GDC	26.1391	-1.10406	0.322955	3.41995	0.00062633	0.0029907
PMO004358	HTAI2	60.5143	1.56989	0.390542	-4.01798	5.87e-05	0.000401914
PMO004359	OLM2B	97.5563	0.87434	0.373256	-2.34216	0.0191727	0.0495028
PMO004366	PACS2	78.1893	0.814545	0.272014	-2.9939	0.00275438	0.0102646
PMO004370	SERA	3.36678	2.42938	0.556615	-2.56855	0.0102125	0.0298381
PMO004373	DHB7	9.05959	-2.06764	0.534142	3.863	0.000112001	0.000702207
PMO004374	UAP1	100.47	1.1414	0.368025	-3.10041	0.00193255	0.00758886
PMO004375	FMO5	3.9612	-2.03798	0.614778	3.28	0.00103808	0.0045463
PMO004377	RGS18	9.86797	1.31315	0.529407	-2.47374	0.0133707	0.0371864
PMO004381	STIMA	1.74835	-1.8121	0.658563	2.69287	0.00708403	0.0221376
PMO004386	ECHD3	159.424	0.696742	0.290917	-2.39489	0.0166253	0.0442164
PMO004388	DHTK1	507.738	-0.714521	0.303154	2.35693	0.0184267	0.0479177
PMO004391	PRP18	271.709	-1.71705	0.285499	6.01328	1.82e-09	3.56e-08
PMO004397	ATPG	4082.71	1.38739	0.310522	-4.46843	7.88e-06	6.97e-05
PMO004398	SPF45	109.515	-0.762823	0.260735	2.92607	0.00343276	0.0122879
PMO004406	ZNF91	19.1045	-1.29325	0.366613	3.52533	0.000422951	0.00216281
PMO004407	CDC5L	190.717	-0.946271	0.295138	3.20645	0.00134383	0.00566605
PMO004408	ENPP4	129.494	1.093	0.352729	-3.0981	0.00194767	0.00764537
PMO004414	RHAG	52.1619	1.27924	0.529526	-2.41527	0.0157234	0.0423096
PMO004416	MUTA	1057.88	-0.793304	0.23946	3.31284	0.000923542	0.00411663
PMO004425	LY6E	21.8095	0.869878	0.362934	-2.39312	0.0167056	0.0443851
PMO004431	EF1D	561.547	-1.19148	0.298482	3.99158	6.56e-05	0.000441934
PMO004432	LY6E	3.31623	-1.83934	0.641643	2.85469	0.00430789	0.0148352
PMO004437	ENPP5	176.736	2.24243	0.463057	-4.84154	1.29e-06	1.38e-05
PMO004441	RCAN2	7.22849	1.57359	0.499291	-3.11438	0.00184333	0.00729801
PMO004458	SPRY3	78.6748	-1.32633	0.320314	4.13986	3.48e-05	0.00025292
PMO004468	INT9	72.892	-0.87667	0.318144	2.75604	0.00585056	0.0189918
PMO004472	PINX1	34.4909	-1.18084	0.418028	2.82615	0.00471108	0.0159522
PMO004474	XKR6	0.996809	1.91272	0.735621	-2.60548	0.00917464	0.0273679
PMO004476	CATB	1213.24	-1.73112	0.314414	5.50502	3.69e-08	5.63e-07
PMO004483	CK5P3	42.1183	-1.26229	0.396599	3.18113	0.00146702	0.00605686
PMO004484	PNPO	33.9215	0.910086	0.382283	-2.37942	0.0173398	0.0455755
PMO004485	EOMES	11.2144	-1.4451	0.506709	2.84353	0.00446163	0.0152697
PMO004487	CWC25	67.5006	-0.632752	0.263584	2.40101	0.0163499	0.0436605
PMO004490	PI42B	94.0922	1.48344	0.277093	-5.34824	8.88e-08	1.26e-06
PMO004496	OTU7B	85.6043	-3.33738	0.428752	7.75926	8.54e-15	3.79e-13
PMO004499	CATK	33.8154	-1.90398	0.447001	4.25306	2.11e-05	0.000164628
PMO004500	ARNT	151.81	2.02112	0.29434	-6.86043	6.87e-12	2.01e-10
PMO004501	ARHG2	77.8326	-1.1377	0.339904	3.34661	0.00081807	0.00371254
PMO004504	INT3	349.312	-1.8658	0.251087	7.43002	1.09e-13	4.16e-12
PMO004508	SEM6C	136.79	1.09803	0.343768	-3.19339	0.00140613	0.00586702
PMO004516	CK074	2.917	-1.89564	0.590092	3.16765	0.00153679	0.0062955
PMO004517	API5	115.67	0.805743	0.32379	-2.48798	0.0128472	0.0360063
PMO004520	ALKB3	9.18138	4.8723	0.612201	-7.65409	1.95e-14	8e-13
PMO004521	CK096	17.1735	2.45907	0.510244	-4.75867	1.95e-06	2e-05
PMO004528	EXT2	29.0241	1.17708	0.430425	-2.72732	0.00638509	0.0203565
PMO004529	PRR5L	46.6684	-2.04245	0.409735	4.98027	6.35e-07	7.36e-06
PMO004534	CLN5	64.5985	-1.94806	0.347847	5.59921	2.15e-08	3.44e-07
PMO004539	PIBF1	5.62729	1.70688	0.464456	-3.61148	0.000304456	0.00164481
PMO004540	BORA	19.7911	4.31668	0.616779	-6.47463	9.5e-11	2.32e-09
PMO004543	NFIP2	30.5919	-0.98297	0.350426	2.80513	0.00502967	0.0167986
PMO004550	SAMH1	23.4262	1.72886	0.337117	-5.10484	3.31e-07	4.1e-06
PMO004551	RLGPB	82.7304	1.3371	0.510595	-2.61764	0.00885414	0.0266079
PMO004555	CHD6	95.1409	1.82082	0.375661	-4.83956	1.3e-06	1.4e-05
PMO004556	RHG39	219.325	1.3922	0.40812	-3.41081	0.000647711	0.00308021
PMO004561	VPS8	71.4455	-0.822381	0.280469	2.93281	0.00335906	0.0120322
PMO004565	DJB11	224.179	-1.62035	0.322999	5.01604	5.27e-07	6.25e-06
PMO004570	CEP63	68.5962	-0.833086	0.342286	2.43422	0.0149238	0.0405949
PMO004573	IF2B2	27.3007	-1.06596	0.38295	2.78178	0.00540618	0.0177851
PMO004574	PFKAL	71.0056	1.11778	0.394709	-2.8325	0.0046186	0.0156946
PMO004579	RHNO1	2.50387	2.42043	0.635216	-3.71289	0.000204909	0.00117199
PMO004587	FOXJ2	49.397	0.844836	0.303628	-2.7802	0.00543261	0.0178438
PMO004591	PAR11	79.2694	1.19141	0.28749	-4.14237	3.44e-05	0.000250694
PMO004594	DIP2B	80.4809	1.888	0.399793	-4.71407	2.43e-06	2.44e-05
PMO004595	LARP4	215.282	0.843322	0.295961	-2.84921	0.00438273	0.0150582
PMO004597	GPDA	253.839	1.55672	0.436021	-3.57184	0.00035448	0.00186621
PMO004600	TWST2	7.37218	2.31639	0.587284	-3.87495	0.000106647	0.000671755
PMO004603	HRG1	41.413	-1.43606	0.366576	3.91744	8.95e-05	0.000574647
PMO004606	ACVR1	169.086	-0.720035	0.198121	3.63441	0.000278617	0.00152241
PMO004610	RPRM	6.39938	2.36305	0.620775	-3.68504	0.000228665	0.00128964
PMO004611	PR40A	338.029	-1.48885	0.275854	5.39709	6.77e-08	9.74e-07
PMO004617	WSDU1	14.3964	-2.13913	0.380272	5.60559	2.08e-08	3.33e-07
PMO004618	BAZ2B	77.2129	0.835828	0.264057	-3.16436	0.00155423	0.00635458
PMO004620	GSTM5	575.885	0.97363	0.309444	-3.14666	0.0016515	0.00667448
PMO004623	S6A17	1.27274	1.86227	0.749916	-2.51715	0.0118307	0.0337415
PMO004628	SAHH2	153.023	2.95497	0.28135	-10.4751	1.12e-25	1.33e-23
PMO004634	K1C18	728.014	8.86533	0.43394	-17.4407	4.05e-68	5.32e-65
PMO004638	CSAD	12.0979	-1.16417	0.44352	2.62518	0.0086603	0.0261299
PMO004642	BN3D2	7.66646	-1.0148	0.37974	2.66993	0.00758671	0.0234486
PMO004645	CABP2	9.62124	3.61133	0.497664	-6.57514	4.86e-11	1.25e-09
PMO004647	FNBP4	302.29	0.897328	0.3705	-2.4221	0.0154312	0.0416824
PMO004649	SPTB1	2933.38	1.37953	0.343173	-4.02057	5.81e-05	0.000398307
PMO004655	MTCH2	215.185	-1.1571	0.292595	3.95454	7.67e-05	0.000506285
PMO004660	XPA	179.97	-1.96256	0.318145	6.16692	6.96e-10	1.45e-08
PMO004670	HEMGN	83.8731	1.6484	0.487509	-3.38019	0.000724346	0.00335964
PMO004671	CXA1	62.3021	1.1279	0.373505	-3.01779	0.00254626	0.00961149
PMO004674	DCBD1	2.63932	1.62565	0.658387	-2.40201	0.0163053	0.0435969
PMO004675	RWDD1	50.9463	1.01303	0.324261	-3.12449	0.00178111	0.00710017
PMO004687	GPTC1	75.0196	0.902175	0.282474	-3.19271	0.00140946	0.0058722
PMO004693	S18L2	20.5825	1.18634	0.319398	-3.70881	0.000208237	0.00118973
PMO004695	MIP18	260.534	3.81564	0.396951	-9.59652	8.27e-22	7.63e-20
PMO004699	EXTL2	23.433	-2.02526	0.322633	6.26394	3.75e-10	8.3e-09
PMO004701	DPYD	31.193	-3.27235	0.4977	6.52917	6.61e-11	1.67e-09
PMO004702	SAS6	56.031	-0.960527	0.290568	3.30558	0.000947815	0.004207
PMO004704	FRRS1	43.4219	1.54992	0.413928	-3.73614	0.000186868	0.00107995
PMO004709	VCAM1	3.74361	-1.79072	0.64439	2.75303	0.00590473	0.0191261
PMO004723	K0825	2.46038	-1.73485	0.652552	2.62175	0.00874804	0.0263703
PMO004725	CD1A	1.14844	-2.60371	0.729155	3.5327	0.000411336	0.00211063
PMO004726	FGD3	22.5228	1.08669	0.335458	-3.23396	0.00122086	0.00524207
PMO004728	BINCA	12.0375	0.932438	0.375713	-2.47951	0.0131564	0.0366679
PMO004729	WNK2	162.041	1.69338	0.433666	-3.90467	9.44e-05	0.000603636
PMO004731	DCTN2	353.269	-1.34297	0.324585	4.13703	3.52e-05	0.000255536
PMO004734	PTPC1	5.63163	1.08408	0.451963	-2.38162	0.0172367	0.0453724
PMO004735	BICD2	85.2116	1.08618	0.411378	-2.63874	0.00832137	0.0253251
PMO004738	PTBP2	12.9923	1.10981	0.392179	-2.819	0.00481731	0.0162284
PMO004739	SNX7	14.4665	-1.22506	0.360629	3.39857	0.000677382	0.00318249
PMO004741	PALMD	174.694	2.87953	0.499606	-5.76936	7.96e-09	1.37e-07
PMO004753	HDAC3	84.7502	0.833024	0.278146	-2.99449	0.002749	0.0102518
PMO004756	ARAP3	467.469	1.02903	0.402347	-2.55792	0.01053	0.0305956
PMO004759	M1I1B	8.61395	2.81794	0.588175	-4.60664	4.09e-06	3.89e-05
PMO004761	ICLN	127.997	-1.06175	0.222304	4.7764	1.78e-06	1.85e-05
PMO004768	RSF1	195.518	0.958794	0.335044	-2.86151	0.00421629	0.0145865
PMO004773	PERQ2	232.639	0.965534	0.215128	-4.48752	7.21e-06	6.43e-05
PMO004779	A16L1	149.586	-1.03518	0.306005	3.38294	0.000717149	0.0033336
PMO004784	PLCG1	232.334	1.21183	0.373629	-3.24302	0.0011827	0.00509809
PMO004791	SYNC	236.401	1.23606	0.189823	-6.51068	7.48e-11	1.86e-09
PMO004792	ALPK2	276.691	1.26762	0.428452	-2.95929	0.00308349	0.0112337
PMO004797	AT8B1	1.92135	-2.44905	0.734043	3.34269	0.000829718	0.00375568
PMO004808	TM209	60.7497	-0.607047	0.192506	3.15347	0.00161342	0.0065528
PMO004811	UBE2H	111.177	5.63416	0.477856	-11.2062	3.8e-29	5.89e-27
PMO004812	FBH1	84.4011	-0.8296	0.321206	2.58284	0.00979918	0.0288627
PMO004813	NIPA	67.1059	-2.72859	0.30106	9.0496	1.43e-19	1.06e-17
PMO004819	RPC6	21.9904	0.91026	0.333439	-2.72996	0.00633429	0.0202386
PMO004821	NRX1A	6.40954	2.06815	0.586594	-3.44044	0.000580773	0.00281014
PMO004823	NRX1A	20.0934	1.98441	0.569685	-3.46089	0.000538402	0.0026391
PMO004825	NRX1B	7.97543	1.76505	0.630372	-2.79152	0.00524619	0.0173947
PMO004826	TBC24	21.6734	-1.24737	0.476026	2.61861	0.00882882	0.026547
PMO004831	MYCD	21.9004	1.10956	0.435895	-2.5409	0.0110567	0.0318332
PMO004832	SCO1	41.6755	-1.12469	0.3496	3.21859	0.00128822	0.00547103
PMO004834	MYH4	24772.1	4.44336	0.430313	-10.3485	4.25e-25	4.86e-23
PMO004839	PJA2	80.129	-2.07571	0.366413	5.66232	1.49e-08	2.46e-07
PMO004842	STAR4	2.79906	2.71249	0.63931	-4.02955	5.59e-05	0.00038598
PMO004843	FXL17	51.2817	-1.45401	0.391448	3.71294	0.000204869	0.00117199
PMO004844	STYX	45.4802	6.40897	0.542799	-10.1404	3.65e-24	3.92e-22
PMO004845	PRS10	580.14	-1.86161	0.263147	7.07378	1.51e-12	4.93e-11
PMO004850	CN166	139.992	0.89415	0.313267	-2.85473	0.00430741	0.0148352
PMO004858	P5I11	18.2028	1.41303	0.41789	-3.37001	0.000751658	0.00346342
PMO004860	EAA2	8.7464	-3.22994	0.60131	5.22061	1.78e-07	2.35e-06
PMO004870	RMP	96.1044	-1.12996	0.297836	3.79435	0.000148029	0.000888678
PMO004871	ZN536	4.99618	3.55341	0.668636	-5.17932	2.23e-07	2.87e-06
PMO004876	CLIP2	8.99401	1.22952	0.466576	-2.61614	0.0088929	0.0266863
PMO004884	BUB3	91.7157	-0.702156	0.260156	2.69944	0.00694554	0.0217804
PMO004894	C2CD5	55.7685	1.0494	0.334305	-3.13636	0.00171057	0.00687099
PMO004899	SIA8A	9.15557	-0.941668	0.396132	2.37224	0.0176806	0.0463324
PMO004901	UCKL1	45.4344	-0.722704	0.292533	2.4709	0.0134773	0.0374164
PMO004906	FNDC4	53.6853	1.61689	0.388895	-4.15395	3.27e-05	0.000240837
PMO004907	IF172	15.5968	1.1676	0.390957	-2.97808	0.00290061	0.0106715
PMO004908	TRI54	298.564	-1.43901	0.319084	4.50921	6.51e-06	5.87e-05
PMO004909	ZN513	181.045	-1.0923	0.313121	3.48806	0.000486541	0.00242326
PMO004924	COMDA	8.29066	-1.49805	0.504248	2.97456	0.00293412	0.0107666
PMO004937	PSA5	627.446	-1.70358	0.319543	5.3305	9.79e-08	1.37e-06
PMO004944	RDH1	109.694	-5.96079	0.37923	15.2518	1.6e-52	1.53e-49
PMO004954	RECQ1	13.6385	1.33725	0.43941	-3.03959	0.00236897	0.00903627
PMO004967	PLCB2	53.0927	1.01101	0.368347	-2.7432	0.00608433	0.0195901
PMO004971	PRLHR	1.55964	2.32543	0.728081	-3.21353	0.00131114	0.00555718
PMO004988	NBN	19.637	0.99617	0.397471	-2.50552	0.0122273	0.0346287
PMO005008	ANFY1	83.3483	1.01207	0.411662	-2.45653	0.0140285	0.0386583
PMO005009	UB2G1	82.6919	-1.10668	0.284772	3.88633	0.000101772	0.00064366
PMO005012	NOL6	158.667	-1.13064	0.304121	3.71765	0.000201081	0.00115198
PMO005016	K1328	10.6814	-2.71358	0.551781	4.85158	1.22e-06	1.32e-05
PMO005017	AQP3	34.8105	1.58636	0.543225	-2.91899	0.00351165	0.0125149
PMO005023	TPGS2	5.37985	-1.29415	0.419858	3.07538	0.00210236	0.00816129
PMO005034	HYDIN	1.18443	1.8035	0.750537	-2.43191	0.0150194	0.0407816
PMO005047	ACER3	6.48396	2.65967	0.581931	-4.36201	1.29e-05	0.000107469
PMO005048	GALT	17.045	-2.59272	0.358055	7.19721	6.15e-13	2.13e-11
PMO005051	AP4A	11.6446	-1.12739	0.32768	3.43851	0.000584923	0.00282503
PMO005057	TIF1B	36.8689	1.43992	0.474944	-3.02966	0.0024483	0.00928501
PMO005064	NGEF	3.01773	1.92547	0.59485	-3.10746	0.00188705	0.00744633
PMO005071	ICAM5	24.7249	2.0215	0.549785	-3.67165	0.000240994	0.00135193
PMO005081	UBL7	111.092	-1.72828	0.282246	6.12253	9.21e-10	1.89e-08
PMO005087	CNO6L	60.7222	0.912553	0.296926	-3.07194	0.00212671	0.00824063
PMO005090	TRI41	28.1499	-1.37271	0.334586	4.09926	4.14e-05	0.000296069
PMO005095	PSB6	808.859	-1.22794	0.348277	3.52521	0.00042315	0.00216281
PMO005110	CAD11	18.7433	1.43097	0.509276	-2.79613	0.00517192	0.0171972
PMO005113	GPR61	2.72204	-3.46009	0.645346	5.30564	1.12e-07	1.55e-06
PMO005125	TRI35	17.5441	-3.73625	0.47515	7.68394	1.54e-14	6.44e-13
PMO005127	RHG30	5.13105	1.64998	0.604721	-2.69588	0.00702019	0.0219752
PMO005134	TRIM7	52.3136	-7.85549	0.550427	13.6193	3.08e-42	1.41e-39
PMO005153	IF6	70.7496	-1.34343	0.333195	4.03222	5.53e-05	0.000383048
PMO005154	UQCC1	65.7483	-1.3754	0.250694	5.48613	4.11e-08	6.21e-07
PMO005158	RPB1	37.5835	-1.49539	0.424861	3.51493	0.000439867	0.002232
PMO005178	GSTCD	16.7659	-2.34557	0.345824	6.75467	1.43e-11	3.98e-10
PMO005184	SCRIB	447.706	1.1597	0.4203	-2.75964	0.00578647	0.0188302
PMO005203	ZN628	34.0287	-1.6947	0.32526	5.20606	1.93e-07	2.53e-06
PMO005207	TM50B	20.3243	-1.12359	0.341047	3.29581	0.000981372	0.00433777
PMO005211	RFESD	26.6311	-1.60735	0.472215	3.39957	0.000674918	0.00317374
PMO005216	CING	18.1427	-3.59184	0.437849	8.05603	7.88e-16	3.97e-14
PMO005226	KCNK3	2.46209	2.3265	0.668288	-3.39523	0.000685716	0.00321018
PMO005232	NACA	227.739	1.27613	0.396711	-3.21791	0.00129127	0.00547957
PMO005240	LENG1	3.5819	1.27533	0.527846	-2.38485	0.017086	0.0451112
PMO005246	PPOX	95.0322	1.3778	0.453079	-3.04077	0.00235972	0.00900423
PMO005247	NDUS2	7042.36	0.842863	0.35372	-2.38315	0.0171654	0.0452755
PMO005262	NFX1	13.7061	-1.54488	0.398325	3.87276	0.00010761	0.000677327
PMO005268	TDRKH	31.8712	2.64442	0.452641	-5.81097	6.21e-09	1.1e-07
PMO005269	RM09	1063.95	-1.13441	0.376381	3.01337	0.0025836	0.0097315
PMO005274	DTX3	23.3526	1.42041	0.547914	-2.59229	0.00953392	0.0282475
PMO005286	TALDO	395.441	-2.80494	0.352343	7.95658	1.77e-15	8.54e-14
PMO005287	NAL12	7.63249	2.19156	0.516281	-4.16489	3.12e-05	0.000230866
PMO005304	SHAN3	225.846	0.997216	0.403683	-2.47031	0.0134997	0.0374463
PMO005313	EFCC1	4.37222	1.75877	0.550734	-3.12835	0.00175788	0.00702886
PMO005315	RAB43	4.06514	2.215	0.625745	-3.51981	0.000431852	0.00219768
PMO005325	HUS1	22.3016	-0.882717	0.323232	2.73166	0.00630169	0.0201593
PMO005332	RN115	8.94609	1.83382	0.425484	-4.26521	2e-05	0.000156735
PMO005338	M21D2	11.2601	1.52232	0.462229	-3.27755	0.00104714	0.00458025
PMO005339	GALT1	89.3096	1.14486	0.342161	-3.34461	0.000823977	0.00373471
PMO005340	CR021	47.8293	2.65637	0.359667	-7.35793	1.87e-13	6.83e-12
PMO005386	OFUT2	100.252	-0.806775	0.278376	2.89847	0.00374994	0.0132032
PMO005388	CG043	15.9056	1.48279	0.464431	-3.18964	0.0014245	0.00592312
PMO005393	MLP3A	397.52	-2.28917	0.306715	7.46187	8.53e-14	3.29e-12
PMO005395	ILF3	256.289	-1.09296	0.218235	5.00832	5.49e-07	6.49e-06
PMO005396	CTL2	85.3122	-0.816762	0.283877	2.87679	0.00401745	0.0139953
PMO005406	RS19	799.278	2.30854	0.439614	-5.25629	1.47e-07	1.97e-06
PMO005408	EIF3C	19.6495	5.82461	0.589741	-9.29112	1.53e-20	1.24e-18
PMO005414	RORG	4.44301	2.07728	0.61065	-3.31376	0.000920493	0.00410652
PMO005444	BOP1	21.493	1.2057	0.358787	-3.35555	0.000792067	0.00361483
PMO005449	ZN774	4.51527	-4.38692	0.665998	6.56126	5.34e-11	1.36e-09
PMO005450	ZSCA2	1.78134	2.82206	0.678372	-4.14891	3.34e-05	0.000244825
PMO005509		5.63643	-4.71511	0.654022	7.16493	7.78e-13	2.63e-11
PMO005529	PRR12	38.7487	1.55622	0.375676	-4.13101	3.61e-05	0.00026142
PMO005553	ABCB8	308.661	2.21347	0.355607	-6.22379	4.85e-10	1.04e-08
PMO005560	PTHD3	62.1037	-3.86473	0.408834	9.38785	6.12e-21	5.14e-19
PMO005616	PCDA3	30.7322	1.93707	0.566487	-3.41657	0.000634158	0.00302122
PMO005632	HA1F	193.812	-4.15675	0.395771	10.4762	1.11e-25	1.33e-23
PMO005633	ASB13	18.3562	5.00982	0.557706	-8.0007	1.24e-15	6.08e-14
PMO005649		5.96649	-4.72485	0.65972	7.10889	1.17e-12	3.88e-11
PMO005665	ZN551	9.10946	-1.47713	0.506739	2.90986	0.00361591	0.0128127
PMO005687	SSRB	27.9172	-1.22325	0.481789	2.53725	0.0111727	0.0321086
PMO005702	ZFP2	2.16963	3.095	0.666045	-4.61617	3.91e-06	3.74e-05
PMO005706	SGF29	52.8225	3.50248	0.407089	-8.50833	1.76e-17	1.07e-15
PMO005746	EFCB1	2.28822	2.18856	0.733564	-2.91518	0.00355485	0.0126432
PMO005755	TOPB1	34.0834	-1.42752	0.337466	4.22868	2.35e-05	0.000180574
PMO005756	NPHP3	9.34797	-1.69508	0.394834	4.28368	1.84e-05	0.000145899
PMO005760	RL14	971.46	-1.26346	0.409296	3.08597	0.00202892	0.00792885
PMO005762	ABHD5	40.7955	-0.974099	0.344991	2.82202	0.00477221	0.0161074
PMO005763	TCAIM	70.4661	3.4914	0.360955	-9.5915	8.68e-22	7.88e-20
PMO005764	CKLF6	7.59975	-3.35825	0.480187	6.71551	1.87e-11	5.12e-10
PMO005765	OSB10	13.4891	-1.57421	0.393289	3.9959	6.44e-05	0.000435054
PMO005768	NGLY1	174.196	-1.17056	0.293407	3.98956	6.62e-05	0.000444849
PMO005781	3HIDH	79.9408	1.15202	0.319676	-3.60212	0.000315633	0.00169217
PMO005785	HXA7	78.3425	1.04772	0.371115	-2.82188	0.0047743	0.0161092
PMO005786	HXA6	7.79632	1.85708	0.495523	-3.69877	0.000216649	0.00122912
PMO005787	HXA5	60.7547	1.50738	0.395271	-3.80853	0.000139794	0.000846972
PMO005789	HXA2	4.61581	1.28744	0.482738	-2.64054	0.00827728	0.0252128
PMO005791	ROA2	765.772	0.642112	0.241406	-2.65996	0.00781495	0.0240481
PMO005794	OSBL3	2.97992	1.441	0.588984	-2.38891	0.0168984	0.0447504
PMO005795	TRA2A	49.9707	-1.18361	0.343001	3.45106	0.000558384	0.00271429
PMO005799	RPA43	96.2731	-1.14201	0.285309	4.00315	6.25e-05	0.00042303
PMO005803	SNX13	55.1828	2.88643	0.476618	-6.00931	1.86e-09	3.64e-08
PMO005804	ANKY2	76.8252	0.667536	0.273654	-2.43903	0.0147268	0.0401828
PMO005808	COSA1	2.26003	2.46242	0.712076	-3.49989	0.000465447	0.00233701
PMO005809	CMC2	10.6118	-0.915109	0.358502	2.55211	0.0107072	0.0310078
PMO005812	PON2	48.3297	1.13768	0.417115	-2.72754	0.00638076	0.0203488
PMO005816	CP51A	42.5328	0.961525	0.386471	-2.48781	0.0128533	0.0360139
PMO005822	MRC1	16.7673	1.72497	0.487059	-3.51419	0.000441105	0.0022372
PMO005840	RAB18	85.5355	-1.01073	0.258378	3.91219	9.15e-05	0.000586204
PMO005841	PAPD1	120.94	0.890782	0.344787	-2.5837	0.00977479	0.028799
PMO005842	JCAD	1255.39	1.7065	0.442662	-3.85754	0.000114532	0.000714722
PMO005848	DIP2C	63.5683	1.57247	0.450919	-3.48225	0.000497211	0.00247173
PMO005856	KMT2C	698.976	1.36216	0.349425	-3.8984	9.68e-05	0.000615376
PMO005864	WDR48	34.6029	-0.800983	0.313713	2.55237	0.0106994	0.0310022
PMO005876	MEOX2	44.9014	1.04001	0.32206	-3.22734	0.00124946	0.00534742
PMO005878	THNS1	16.1032	1.78854	0.441336	-4.02183	5.77e-05	0.000396963
PMO005879	DPS1	23.7157	1.35032	0.410822	-3.28311	0.00102667	0.00450759
PMO005888	ASTE1	9.36248	-1.7572	0.408883	4.28933	1.79e-05	0.000142666
PMO005889	PI3R4	567.359	-1.283	0.283366	4.52741	5.97e-06	5.45e-05
PMO005896	HXA11	1.26437	1.71244	0.702593	-2.44035	0.014673	0.0400627
PMO005898	RPP38	12.3452	1.16725	0.4294	-2.71557	0.00661625	0.020973
PMO005907	ESYT2	54.9721	1.57009	0.490872	-3.19325	0.00140682	0.00586702
PMO005913	ZNRF2	2.16397	-3.58085	0.685648	5.18875	2.12e-07	2.75e-06
PMO005914	MDR1	50.6588	1.43511	0.35641	-4.0201	5.82e-05	0.000398847
PMO005915	SKAP2	9.22248	-1.60037	0.370831	4.30277	1.69e-05	0.000135094
PMO005918	CDA7L	2.24095	-2.85114	0.663181	4.24716	2.16e-05	0.000168772
PMO005921	THB	1.96724	1.68553	0.63169	-2.5962	0.00942616	0.0279991
PMO005930	LMBR1	18.0695	1.26291	0.396038	-3.17765	0.00148475	0.00610981
PMO005935	TOM7	7.4645	3.17012	0.649491	-4.58583	4.52e-06	4.25e-05
PMO005940	LAR4B	122.9	2.04218	0.517902	-3.94493	7.98e-05	0.000523082
PMO005941	PAXI1	34.1395	-1.10483	0.342786	3.22347	0.00126646	0.00539385
PMO005952	MTMRD	35.4151	1.40341	0.418544	-3.34423	0.000825104	0.00373801
PMO005955	ST5	338.086	4.32204	0.378028	-11.389	4.74e-30	8.05e-28
PMO005964	OTOG	15.5551	1.54876	0.589446	-2.61527	0.00891561	0.0267392
PMO005968	TF2H1	102.599	-1.13865	0.31545	3.60939	0.000306917	0.00165641
PMO005973	AFAD	87.2765	0.776721	0.249211	-3.11568	0.00183519	0.00726894
PMO005982	CA198	7.06556	2.10039	0.45609	-4.4942	6.98e-06	6.27e-05
PMO005983	ANGT	15.4207	3.72547	0.633903	-5.51974	3.4e-08	5.21e-07
PMO005985	TAF5L	247.194	-1.78788	0.291336	6.13604	8.46e-10	1.75e-08
PMO005987	ACTS	56414.1	0.955569	0.381272	-2.50677	0.012184	0.0345339
PMO005988	CCSAP	1.44782	1.92747	0.709159	-2.64388	0.00819606	0.0250047
PMO005990	TSNAX	40.2077	-1.29905	0.366251	3.54797	0.000388212	0.00200468
PMO005997	LEG8	23.6137	1.15652	0.373686	-3.08834	0.00201276	0.00787154
PMO005998	METH	20.5144	-0.863775	0.34572	2.49646	0.012544	0.0352789
PMO006012	PEX3	40.2489	-1.0853	0.38712	2.80483	0.00503436	0.0168089
PMO006013	PHAR2	100.258	1.64593	0.368236	-4.46552	7.99e-06	7.05e-05
PMO006022	RF1ML	59.7175	-1.01133	0.274451	3.68536	0.000228379	0.00128872
PMO006023	SYNE1	243.427	1.6069	0.421534	-3.81209	0.000137798	0.000836504
PMO006028	RM18	120.894	-5.72982	0.401527	13.977	2.16e-44	1.19e-41
PMO006030	MPRI	1056.01	-1.71815	0.329491	5.21356	1.85e-07	2.44e-06
PMO006035	VNN2	38.0877	-2.19386	0.479439	4.56819	4.92e-06	4.58e-05
PMO006038	CTGF	151.905	1.1525	0.420205	-2.74272	0.00609334	0.0196003
PMO006039	MED23	110.63	-0.641615	0.243804	2.63169	0.00849604	0.0257376
PMO006041	E41L2	329.52	1.05506	0.342294	-3.0822	0.00205474	0.00800893
PMO006051	YPEL5	38.5251	-1.18418	0.342526	3.45717	0.000545877	0.00266828
PMO006057	GTR12	16.923	1.80819	0.466753	-3.85101	0.000117634	0.000731571
PMO006061	RMND1	258.985	-1.0605	0.305233	3.47441	0.000511984	0.00253201
PMO006068	HDC	147.05	0.836565	0.34361	-2.43373	0.014944	0.0406385
PMO006075	EMARD	9.31236	1.72175	0.389016	-4.38442	1.16e-05	9.81e-05
PMO006076	COA6	2.86838	-1.73663	0.598953	2.87106	0.00409094	0.0142136
PMO006078	K0408	82.1835	2.02542	0.705669	-2.93936	0.00328894	0.0118092
PMO006079	NUP43	32.2046	-0.680215	0.253499	2.68334	0.00728901	0.0226945
PMO006085	PEX7	36.164	0.756197	0.317671	-2.37972	0.0173257	0.0455497
PMO006086	PDE7B	152.033	-1.30384	0.407612	3.19773	0.00138515	0.00580013
PMO006088	PIGM	6.79043	-1.1688	0.452698	2.58028	0.00987192	0.0290445
PMO006100	NU133	82.7681	-1.61935	0.259745	6.23314	4.57e-10	9.94e-09
PMO006102	CXE1	1.43682	1.64527	0.721004	-2.36663	0.0179511	0.046936
PMO006103	HDDC2	42.9489	0.849494	0.332944	-2.55164	0.0107216	0.0310268
PMO006107	KCNC1	2.04353	2.50014	0.695003	-3.60692	0.000309853	0.00166712
PMO006108	WDR43	132.934	-0.966234	0.263323	3.66948	0.000243048	0.00135983
PMO006109	CLIP4	280.639	1.60276	0.439227	-3.65004	0.000262199	0.00144849
PMO006110	BIG3	38.018	3.98524	0.484651	-7.96994	1.59e-15	7.7e-14
PMO006111	FNDC1	7.1962	1.6802	0.614057	-2.70572	0.00681568	0.021441
PMO006123	GRAM2	8.1615	0.893922	0.376128	-2.36938	0.0178179	0.0466433
PMO006125	AP3B2	8.88461	1.31111	0.479126	-2.72321	0.00646518	0.0205682
PMO006128	PATL2	2.76693	-1.48524	0.560384	2.63691	0.00836652	0.0254249
PMO006129	SNX1	177.274	-1.75169	0.27045	6.47618	9.41e-11	2.3e-09
PMO006138	RS27L	9.2398	4.82426	0.62177	-7.4787	7.51e-14	2.91e-12
PMO006139	C2C4C	19.4564	-1.90509	0.542605	3.51006	0.000448006	0.00226347
PMO006141	RORA	18.1774	2.37521	0.392636	-5.97852	2.25e-09	4.36e-08
PMO006146	OTU7A	47.9449	0.950962	0.315141	-3.01756	0.00254818	0.00961519
PMO006150	ADAL	11.9185	1.74931	0.456165	-3.81261	0.000137507	0.000835524
PMO006151	LRC49	6.89707	1.40475	0.552666	-2.52374	0.0116115	0.0332063
PMO006153	THSD4	20.7506	1.65479	0.50925	-3.22915	0.00124161	0.00532247
PMO006157	Z280D	98.0539	1.80771	0.264952	-6.81498	9.43e-12	2.67e-10
PMO006159	PRTG	2.946	2.38223	0.722899	-3.16651	0.00154279	0.00631765
PMO006162	RLP24	108.379	-1.23439	0.342221	3.60722	0.000309497	0.00166691
PMO006164	F214A	989.633	-0.636944	0.241047	2.64236	0.00823306	0.0250926
PMO006166	MYO5A	6.64993	2.06313	0.491548	-4.09481	4.23e-05	0.000300625
PMO006167	MYO5C	2.98955	1.8807	0.64348	-2.86282	0.00419885	0.0145453
PMO006173	DTWD1	20.9269	1.5694	0.357861	-4.37314	1.22e-05	0.000102785
PMO006176	SQRD	99.0775	0.826045	0.319175	-2.58758	0.00966526	0.0285722
PMO006178	SH3G3	10.4693	2.67923	0.578496	-4.49622	6.92e-06	6.21e-05
PMO006180	ATL3	11.9626	1.97365	0.52613	-3.70289	0.000213154	0.00121059
PMO006181	ETUD1	66.6567	-0.626858	0.25366	2.47152	0.0134539	0.0373782
PMO006182	MEX3B	161.482	1.9724	0.28892	-6.82222	8.96e-12	2.56e-10
PMO006183	MESD	30.289	-0.89631	0.264408	3.38969	0.000699708	0.00326406
PMO006187	PLIN1	111.687	1.78096	0.501154	-3.55516	0.000377755	0.00195751
PMO006193	KLH25	26.9965	0.92632	0.277207	-3.33777	0.000844523	0.00380469
PMO006197	SYNEM	598.308	1.92862	0.395344	-4.87922	1.07e-06	1.17e-05
PMO006206	RASLC	14.8309	1.36543	0.425869	-3.19319	0.0014071	0.00586702
PMO006209	MP2K1	168.147	-0.89369	0.314284	2.8437	0.0044593	0.0152666
PMO006211	CO061	56.8074	5.50486	0.49645	-9.98127	1.84e-23	1.86e-21
PMO006222	FRMD5	5.87436	1.73485	0.587092	-2.91902	0.00351131	0.0125149
PMO006224	ZN710	42.6514	0.956563	0.342301	-2.79226	0.00523413	0.0173767
PMO006227	VP33B	129.282	-0.825706	0.292845	2.81972	0.00480661	0.0162017
PMO006237	DET1	20.8806	0.822156	0.33649	-2.43823	0.0147593	0.0402611
PMO006241	DCHS	11.1961	1.51015	0.509636	-2.94772	0.00320129	0.0115462
PMO006244	WHAMM	425.619	-1.03766	0.356576	2.90959	0.00361908	0.0128197
PMO006245	TM6S1	309.04	-0.847091	0.338038	2.50577	0.0122185	0.0346131
PMO006247	FMT	67.7386	-1.6662	0.262086	6.35665	2.06e-10	4.79e-09
PMO006249	LYSM2	48.571	1.15757	0.339429	-3.40911	0.00065174	0.00309658
PMO006252	DUT	32.9912	-1.41212	0.368324	3.83456	0.000125791	0.000774166
PMO006253	MFAP1	179.456	-1.53796	0.309716	4.96533	6.86e-07	7.9e-06
PMO006254	DHSO	8.67089	2.09772	0.507766	-4.06559	4.79e-05	0.000336819
PMO006256	NTRK3	5.08805	1.13762	0.482469	-2.33866	0.019353	0.0498461
PMO006258	GALK2	49.224	-1.29212	0.30892	4.18345	2.87e-05	0.000215067
PMO006262	RM46	153.897	0.764319	0.29092	-2.62739	0.00860428	0.0260131
PMO006273	TRIP4	93.6941	-1.50264	0.340014	4.41881	9.92e-06	8.53e-05
PMO006282	VIP1	116.476	1.85686	0.361181	-5.13759	2.78e-07	3.5e-06
PMO006283	TTL13	5.83482	1.52365	0.471201	-3.19208	0.00141251	0.00588258
PMO006287	CHD2	393.366	-1.23116	0.284674	4.32452	1.53e-05	0.000124611
PMO006289	RAM	14.2607	3.47797	0.496571	-6.64284	3.08e-11	8.16e-10
PMO006291	LRRK1	31.0869	2.05969	0.447009	-4.58425	4.56e-06	4.27e-05
PMO006297	RED	394.53	-0.793448	0.307717	2.57852	0.00992251	0.0291607
PMO006299	RHG07	12.4889	1.71759	0.446059	-3.81477	0.000136309	0.000829596
PMO006312	UBE2B	232.828	-1.72461	0.474367	3.63368	0.000279406	0.00152514
PMO006314	SC24A	716.626	-1.09717	0.31395	3.4945	0.000474954	0.00237454
PMO006317	TXD15	37.2132	0.858332	0.254016	-3.37703	0.000732723	0.00338953
PMO006330	SQSTM	3414.5	-1.8001	0.282576	6.36973	1.89e-10	4.44e-09
PMO006335	TCOF	112.159	-1.27319	0.326563	3.89906	9.66e-05	0.000614792
PMO006336	SYNPO	253.879	3.95321	0.431103	-9.13818	6.35e-20	4.74e-18
PMO006339	SAP3	8.47938	-1.07499	0.447691	2.40024	0.0163841	0.0437298
PMO006354	HIG2A	37.5524	-5.13349	0.43465	11.285	1.56e-29	2.48e-27
PMO006355	FAF2	125.902	-1.30654	0.268363	4.86823	1.13e-06	1.23e-05
PMO006358	NSD1	303.241	1.06756	0.283307	-3.76747	0.000164908	0.000974449
PMO006369	STC2	9.02397	-1.45348	0.605943	2.38616	0.0170255	0.0449739
PMO006372	NEU1B	9.041	2.35087	0.48919	-4.68339	2.82e-06	2.8e-05
PMO006373	ADRB2	75.9524	1.45278	0.530072	-2.74053	0.00613409	0.0196995
PMO006375	AF1L1	6.89656	1.37076	0.480579	-2.82515	0.00472582	0.0159918
PMO006376	GRPE2	12.081	2.27251	0.548689	-4.08881	4.34e-05	0.000307282
PMO006377	PCYXL	42.1351	-1.97041	0.359808	5.47236	4.44e-08	6.65e-07
PMO006379	TRI25	16.1015	-0.92503	0.392116	2.35938	0.0183057	0.0476266
PMO006385	ADA1B	25.4558	-1.49751	0.384172	3.89561	9.8e-05	0.000622114
PMO006386	TTC1	94.7812	-0.823656	0.332274	2.47919	0.013168	0.0366808
PMO006390	NFIP1	310.698	-1.11863	0.316286	3.53658	0.000405342	0.00208393
PMO006421	MAML1	58.6212	1.46571	0.460217	-3.18009	0.00147228	0.00607142
PMO006422	UNC5A	5.15231	2.57077	0.656566	-3.76113	0.000169146	0.00099326
PMO006424	MYOTI	1372.21	3.03983	0.440655	-6.90743	4.94e-12	1.48e-10
PMO006430	FGFR4	88.6992	2.58738	0.22045	-11.7008	1.26e-31	2.51e-29
PMO006433	GBRB2	2.19709	-1.91669	0.718998	2.58865	0.00963537	0.0284919
PMO006436	MYOZ3	111.249	2.06201	0.4391	-4.69354	2.69e-06	2.67e-05
PMO006440	ARH37	41.5042	2.4984	0.495299	-5.01715	5.24e-07	6.22e-06
PMO006441	RNF14	370.188	-1.27079	0.199333	6.37514	1.83e-10	4.29e-09
PMO006445	REEP2	2.01315	1.96341	0.645461	-2.9542	0.00313483	0.0113644
PMO006447	S36A1	55.2881	1.72152	0.5381	-3.19794	0.00138412	0.00580013
PMO006449	PTPRG	53.545	1.6191	0.292759	-5.52244	3.34e-08	5.14e-07
PMO006451		6.12662	2.33707	0.566324	-3.99613	6.44e-05	0.000434914
PMO006452	HGFL	45.2676	0.835826	0.352298	-2.37213	0.0176859	0.0463346
PMO006458	CA2D2	8.09667	1.81559	0.535211	-3.35676	0.000788622	0.00360575
PMO006468	GL8D1	31.4701	-1.04683	0.334134	3.13465	0.00172058	0.0069086
PMO006474	RBM5	356.309	-0.794485	0.292059	2.72027	0.00652281	0.020714
PMO006478	IFRD2	59.8062	-1.42146	0.335432	4.23641	2.27e-05	0.000175627
PMO006479	GPX1	4266.07	1.16692	0.338319	-3.44965	0.000561309	0.00272724
PMO006480	UBP4	1058.71	-1.06349	0.241584	4.40208	1.07e-05	9.11e-05
PMO006485	ABHD6	23.8728	1.63606	0.46056	-3.54242	0.000396472	0.00204333
PMO006488	CO7A1	69.3107	5.69873	0.412351	-12.5756	2.87e-36	9.45e-34
PMO006493	RPN1	440.879	-1.13954	0.25795	4.41768	9.98e-06	8.56e-05
PMO006494	GATA2	44.4086	1.57059	0.43651	-3.58973	0.000331024	0.00176122
PMO006496	MGLL	347.226	1.08429	0.441806	-2.45467	0.0141014	0.038788
PMO006501	TMM43	81.9319	-0.806661	0.298948	2.69861	0.00696299	0.0218221
PMO006502	LSM3	4.92213	-4.50703	0.62017	7.18757	6.6e-13	2.27e-11
PMO006506	MTMRE	89.8131	-1.08222	0.354135	3.05628	0.00224098	0.00860733
PMO006507	OGG1	61.0434	-2.43596	0.311248	7.81807	5.36e-15	2.47e-13
PMO006513	SC6A8	5358.57	-1.07222	0.31178	3.43873	0.000584448	0.00282465
PMO006515	SYQ	488.913	-0.802938	0.29733	2.70038	0.00692596	0.0217439
PMO006521	HTD2	13.5289	-1.51787	0.436923	3.47482	0.000511194	0.00252929
PMO006526	SAMC	62.2757	-1.91302	0.362389	5.27603	1.32e-07	1.79e-06
PMO006529	GP173	8.8425	4.25671	0.612621	-6.43065	1.27e-10	3.03e-09
PMO006533	CNTN4	10.4063	-3.34284	0.513468	6.33895	2.31e-10	5.33e-09
PMO006535	SETMR	36.9635	-1.13723	0.324815	3.50132	0.000462964	0.00232676
PMO006536	ITPR1	185.496	2.05009	0.33364	-6.14016	8.24e-10	1.71e-08
PMO006539	ARL8B	42.8971	-0.910457	0.304337	2.99165	0.00277477	0.0103186
PMO006546	CAV3	21.149	1.46149	0.529113	-2.75633	0.00584541	0.0189809
PMO006548	VHL	45.6262	-0.941163	0.343093	2.74269	0.0060939	0.0196003
PMO006553	ZMY10	46.3803	1.44351	0.333697	-4.32318	1.54e-05	0.000125176
PMO006556	RUVB1	216.783	-0.823413	0.258397	3.1868	0.00143858	0.00597458
PMO006557	JAGN1	60.7423	-1.29964	0.273398	4.75377	2e-06	2.04e-05
PMO006561	TRNT1	125.37	-0.770693	0.313747	2.45664	0.0140245	0.0386573
PMO006562	RBNS5	126.047	0.715224	0.238913	-2.99318	0.00276088	0.0102779
PMO006564	PLXB1	6.53772	2.08461	0.445733	-4.55687	5.19e-06	4.81e-05
PMO006565	U3IP2	28.0347	-0.972124	0.343957	2.82743	0.00469235	0.015899
PMO006567	DP13A	55	1.00688	0.375702	-2.67686	0.00743166	0.0230347
PMO006571	SETD5	91.8274	0.736401	0.302574	-2.43252	0.014994	0.0407534
PMO006572	PLXA1	130.877	1.58251	0.376698	-4.19818	2.69e-05	0.000203861
PMO006573	MITF	401.979	1.18794	0.410199	-2.89635	0.00377534	0.0132749
PMO006574	FLNB	284.12	1.50279	0.423039	-3.5526	0.000381439	0.00197261
PMO006576	DALD3	47.1076	-1.17561	0.330089	3.56149	0.000368751	0.0019202
PMO006580	HEM1	3778.73	-1.91025	0.411122	4.64443	3.41e-06	3.31e-05
PMO006587	SPN90	150.437	-0.616822	0.234815	2.62669	0.00862193	0.0260514
PMO006589	IRAK2	22.1364	1.05258	0.342501	-3.06733	0.00215977	0.00833802
PMO006591	BRPF1	208.183	-0.911742	0.24252	3.75962	0.000170169	0.000998247
PMO006596	NEK4	24.456	0.886511	0.327517	-2.70477	0.00683523	0.0214921
PMO006600	SEM3D	23.4362	2.13004	0.428185	-4.94466	7.63e-07	8.71e-06
PMO006602	FACD2	5.39519	-1.30146	0.470324	2.76787	0.00564232	0.0184312
PMO006604	UBP19	394.789	-0.764228	0.180561	4.23254	2.31e-05	0.000178019
PMO006609	NOVA1	12.579	1.02805	0.415061	-2.46487	0.0137064	0.0379135
PMO006610	SPRE1	14.9871	-2.00989	0.463498	4.32595	1.52e-05	0.000123986
PMO006611	GREM1	1.61072	1.91431	0.715715	-2.67048	0.00757438	0.0234174
PMO006612	RYR3	551.59	-3.84937	0.687115	5.6779	1.36e-08	2.26e-07
PMO006615	IF2A	179.442	-0.656686	0.252413	2.6018	0.00927354	0.0276081
PMO006619	T229B	3.11646	1.73518	0.605752	-2.78454	0.00536034	0.017673
PMO006620	EXD2	38.5902	1.6302	0.473579	-3.43549	0.000591474	0.00285143
PMO006622	S39A9	24.2722	-0.771051	0.254763	3.02651	0.00247391	0.00936864
PMO006627	NO66	356.014	-1.04706	0.403002	2.59747	0.00939126	0.0279033
PMO006628	ACOT1	26.6133	-1.61089	0.359873	4.47099	7.79e-06	6.89e-05
PMO006630	PTGR2	247.61	1.52358	0.324085	-4.70139	2.58e-06	2.58e-05
PMO006631	UBR1	112.493	1.39531	0.3202	-4.35456	1.33e-05	0.000110662
PMO006633	CDAN1	18.8597	1.75226	0.428045	-4.06431	4.82e-05	0.00033844
PMO006639	EHD4	261.678	1.8733	0.537023	-3.49406	0.000475735	0.00237619
PMO006640	SPTN5	16.8857	-2.08856	0.375904	5.54085	3.01e-08	4.64e-07
PMO006646	JIP1	257.062	1.02407	0.429009	-2.38744	0.0169664	0.0448628
PMO006650	ATG13	214.211	-1.55171	0.266485	5.82193	5.82e-09	1.03e-07
PMO006652	T178B	1.62439	-1.58401	0.654582	2.40605	0.016126	0.0432162
PMO006653	PTPM1	84.7698	-0.733731	0.25337	2.89591	0.00378059	0.0132889
PMO006656	FUT8	38.0941	1.50091	0.388641	-3.85558	0.000115454	0.000719382
PMO006668	FCF1	27.0447	-0.869333	0.301531	2.88389	0.00392792	0.0137379
PMO006676	TTLL5	15.6593	2.25251	0.339217	-6.56147	5.33e-11	1.36e-09
PMO006681	MAAI	40.3967	5.58075	0.556178	-8.79708	1.4e-18	9.24e-17
PMO006689	ZN106	426.483	2.03757	0.491176	-4.15349	3.27e-05	0.000241146
PMO006690	DCAF4	34.1372	-1.15745	0.325054	3.56156	0.000368652	0.0019202
PMO006691	RA51B	1.33867	1.74046	0.709561	-2.45509	0.0140848	0.0387527
PMO006705	KPCD1	38.4383	0.815411	0.305448	-2.66894	0.00760907	0.023497
PMO006713	PA24F	20.4842	-1.60227	0.559592	2.85942	0.00424422	0.0146735
PMO006714	SUSD6	57.3362	1.33554	0.476611	-2.79853	0.00513357	0.0171021
PMO006720	MADD	32.6508	0.791332	0.323531	-2.44275	0.0145758	0.0398431
PMO006724	VASH1	152.846	1.98406	0.459777	-4.31527	1.59e-05	0.000128748
PMO006728	RPAP1	34.0224	0.870845	0.241367	-3.60478	0.000312417	0.0016792
PMO006729	LRC57	18.7244	-0.727055	0.280801	2.58971	0.00960576	0.0284203
PMO006748	CP2H1	3.02509	-2.03985	0.67772	2.95991	0.0030773	0.0112216
PMO006751	ANTR1	10.1884	1.78281	0.53326	-3.30333	0.000955432	0.00423545
PMO006759	ACTA	232.255	1.31714	0.285723	-4.6092	4.04e-06	3.85e-05
PMO006762	5HT7R	4.61734	1.89942	0.557439	-3.31265	0.000924169	0.00411768
PMO006768	KIF11	3.55156	1.33678	0.502383	-2.61354	0.0089609	0.0268597
PMO006770	DUS11	42.3108	1.35871	0.3556	-3.81588	0.0001357	0.000827408
PMO006772	ENTP7	11.5556	1.24956	0.452676	-2.75517	0.0058661	0.0190305
PMO006778	P4K2A	79.9933	-1.00821	0.243221	4.1449	3.4e-05	0.000248455
PMO006780	UBTD1	109.633	-1.58021	0.34698	4.55227	5.31e-06	4.91e-05
PMO006783	PPRC1	79.2126	-1.07987	0.23805	4.5358	5.74e-06	5.27e-05
PMO006790	PEO1	111.685	-0.991209	0.332354	2.98233	0.00286067	0.010556
PMO006795	5NTC	247.741	-2.14025	0.337559	6.33837	2.32e-10	5.34e-09
PMO006806	SPF30	65.0659	-0.920843	0.314975	2.9242	0.00345341	0.0123492
PMO006810	GFRA1	2.00722	1.63807	0.683319	-2.41828	0.0155941	0.0420261
PMO006816	F204A	126.599	-0.889232	0.285743	3.11236	0.001856	0.00734028
PMO006822	ATE1	50.2443	2.43284	0.443514	-5.45973	4.77e-08	7.1e-07
PMO006826	PPR3C	106.056	2.92549	0.552409	-5.29842	1.17e-07	1.6e-06
PMO006831	SPD2A	12.5131	1.59963	0.424148	-3.74044	0.000183696	0.00106455
PMO006833	ZDHC6	245.045	-0.783553	0.30016	2.61056	0.00903945	0.0270372
PMO006834	HS12A	17.5592	1.76086	0.400322	-4.36944	1.25e-05	0.000104371
PMO006840	MARH8	5.88619	-1.22065	0.514156	2.36104	0.0182236	0.0474834
PMO006845	CUE2A	78.2984	-0.811016	0.329839	2.45936	0.0139187	0.0383857
PMO006848	CUTC	72.4286	1.05547	0.312738	-3.37287	0.000743892	0.0034374
PMO006850	EXOC6	52.5775	2.38237	0.426042	-5.57118	2.53e-08	3.98e-07
PMO006853	AGRA3	23.2115	3.17087	0.530088	-5.8453	5.06e-09	9.1e-08
PMO006854	CNNM1	2.30472	1.88504	0.734231	-2.46012	0.0138892	0.0383293
PMO006855	SEM4G	4.94282	1.58794	0.486456	-3.20623	0.00134488	0.0056682
PMO006856	XPP1	96.7265	-1.44084	0.351168	4.10325	4.07e-05	0.000291458
PMO006857	GPAT1	227.843	1.55226	0.518436	-2.99749	0.00272215	0.0101588
PMO006863	STN1	6.01025	1.14388	0.440945	-2.57659	0.00997811	0.0292588
PMO006864	MCMBP	103.612	-1.42135	0.321941	4.41501	1.01e-05	8.65e-05
PMO006872	TLL2	2.07699	2.20055	0.656819	-3.27221	0.00106711	0.00465252
PMO006881	EIF2A	131.384	-1.04245	0.242991	4.29036	1.78e-05	0.000142111
PMO006886	ARHGQ	9.7239	-2.44466	0.434839	5.57182	2.52e-08	3.97e-07
PMO006887	GUAA	105.085	-0.910399	0.213911	4.25637	2.08e-05	0.000162452
PMO006897	MFSD1	155.17	0.834286	0.287547	-2.90113	0.00371815	0.0131241
PMO006904	NEUS	100.731	1.26278	0.286656	-4.40405	1.06e-05	9.05e-05
PMO006908	GP160	4.5187	1.73213	0.552972	-3.07778	0.0020855	0.00810779
PMO006913	NDUB5	2282.62	1.70815	0.287188	-5.94827	2.71e-09	5.17e-08
PMO006916	SENP5	138.329	-1.30725	0.30811	4.24297	2.21e-05	0.00017157
PMO006917	RPAB3	32.5887	-0.91195	0.295941	3.08122	0.00206155	0.00802655
PMO006921	ALG3	36.7076	-1.27482	0.380652	3.35004	0.000807985	0.00367469
PMO006922	RNPL1	119.704	1.17565	0.329389	-3.56781	0.000359979	0.00188921
PMO006925	IF4E2	76.7092	-1.45137	0.305564	4.74961	2.04e-06	2.07e-05
PMO006932	P63	9.48238	2.06837	0.610297	-3.35233	0.000801353	0.00364768
PMO006936	CCD50	125.235	3.15543	0.388904	-8.08048	6.45e-16	3.3e-14
PMO006943	RFC4	25.9544	-1.5706	0.336284	4.66625	3.07e-06	3e-05
PMO006956	LPP	11.8731	-1.40363	0.369084	3.8012	0.000143997	0.000868936
PMO006960	KCAB1	26.9969	2.54571	0.39729	-6.3544	2.09e-10	4.85e-09
PMO006963	ECEL1	1.89263	2.16059	0.699927	-3.06469	0.00217896	0.0083943
PMO006966	RUBIC	31.2583	1.39125	0.339236	-4.08977	4.32e-05	0.000306213
PMO006968	B3GL1	1.42624	2.14837	0.697028	-3.09454	0.00197121	0.00773203
PMO006975	ZN639	88.6994	0.817688	0.314691	-2.59859	0.00936083	0.0278208
PMO006976	MBNL1	314.57	1.72433	0.368736	-4.67532	2.93e-06	2.89e-05
PMO006981	HDAC2	126.597	-0.719623	0.252736	2.84766	0.00440425	0.0151225
PMO006996	PPCE	154.109	-0.875207	0.30579	2.86226	0.00420638	0.0145666
PMO006998	POPD1	270.675	-1.30645	0.346815	3.76644	0.000165595	0.000977566
PMO006999	HACE1	11.5541	1.05827	0.350103	-3.01064	0.002607	0.00980561
PMO007004	GPR63	5.98493	1.25918	0.513715	-2.42379	0.0153596	0.0415325
PMO007007	LYRM2	7.47115	4.06952	0.607162	-6.24858	4.14e-10	9.06e-09
PMO007013	AKIR2	76.97	-0.89002	0.298671	2.98061	0.00287676	0.0106005
PMO007016	TBX18	5.85834	1.30031	0.516677	-2.49793	0.0124922	0.0351895
PMO007017	MAOX	143.85	-1.81876	0.286289	6.35199	2.13e-10	4.92e-09
PMO007026	COCA1	7.90122	2.2138	0.543323	-3.97306	7.1e-05	0.000473815
PMO007030	OGRL1	2.80395	1.48823	0.616067	-2.35279	0.0186334	0.0483595
PMO007040	DYST	852.151	1.89639	0.29973	-6.32693	2.5e-10	5.67e-09
PMO007044	KLH31	272.541	1.94376	0.63508	-3.08449	0.00203902	0.00795946
PMO007049	EPHA7	4.75044	1.6514	0.519925	-3.12001	0.00180842	0.00718183
PMO007052	FBXL4	138.39	-2.32262	0.423166	5.48223	4.2e-08	6.31e-07
PMO007059	LAMA4	33.0648	2.08676	0.48116	-4.32044	1.56e-05	0.000126547
PMO007060	CDK19	48.8321	1.08804	0.386335	-2.81184	0.00492587	0.01652
PMO007063	LCA5	9.75824	1.30167	0.431951	-3.00114	0.00268968	0.0100662
PMO007067	M3K7	176.523	-1.02671	0.31262	3.28398	0.00102354	0.00449758
PMO007068	SESN1	1264.57	-2.10998	0.233639	9.03022	1.71e-19	1.24e-17
PMO007075	ICK	31.4766	1.17295	0.408094	-2.86788	0.00413229	0.0143384
PMO007077	LMBD1	60.3607	-0.77608	0.273739	2.83499	0.00458271	0.0156079
PMO007078	IBTK	142.554	1.61055	0.353345	-4.55554	5.23e-06	4.84e-05
PMO007083	CE162	7.0389	1.12368	0.432315	-2.58379	0.00977218	0.028799
PMO007087	UBP10	129.052	0.77146	0.306626	-2.5159	0.0118728	0.0338434
PMO007091	ARY1	1.9317	1.91073	0.663725	-2.78145	0.00541173	0.0177978
PMO007094	PPR3D	52.8175	2.55064	0.550695	-4.61488	3.93e-06	3.76e-05
PMO007095	CDYL2	2.67753	2.89743	0.625375	-4.41864	9.93e-06	8.53e-05
PMO007096	WWOX	28.4485	-1.73435	0.256479	6.75725	1.41e-11	3.93e-10
PMO007097	PSF3	13.8717	2.55194	0.384016	-6.52197	6.94e-11	1.74e-09
PMO007107	F192A	25.8609	3.4767	0.367404	-9.20492	3.42e-20	2.67e-18
PMO007113	LCAT	6.71622	-1.64902	0.557234	2.94098	0.00327171	0.0117598
PMO007114	YCP6	50.3627	-1.08219	0.35313	3.06474	0.00217856	0.0083943
PMO007116	PKH4B	101.909	1.72412	0.441697	-3.89989	9.62e-05	0.000613068
PMO007118	IL34	1.24924	2.24073	0.718297	-3.12604	0.00177179	0.00707373
PMO007123	WDR59	32.1922	0.820258	0.298069	-2.74917	0.00597463	0.0192933
PMO007124	LDHD	196.214	-0.888015	0.297213	2.98765	0.00281135	0.0104473
PMO007126	OGFD1	34.0564	-0.867297	0.354109	2.45006	0.0142834	0.0392271
PMO007128	B3GN9	4.59694	2.09454	0.538164	-3.754	0.000174037	0.00101753
PMO007131	OSGI1	225.811	1.09223	0.426592	-2.56072	0.0104456	0.0303926
PMO007132	S7A6O	65.3806	-0.783594	0.270382	2.89831	0.00375182	0.0132054
PMO007134	NFAC3	125.325	1.53618	0.478511	-3.20964	0.001329	0.00561927
PMO007140	RBL2	616.729	1.09593	0.381119	-2.8758	0.00403004	0.0140298
PMO007143	PAPD5	39.3588	-0.707965	0.217964	3.24878	0.00115901	0.00501333
PMO007144	LONP2	391.769	-0.931437	0.28284	3.29304	0.00099112	0.00437707
PMO007147	UCRI	3041.46	0.998871	0.328933	-3.03703	0.00238924	0.00909051
PMO007151	CAD13	204.728	1.73977	0.337582	-5.15191	2.58e-07	3.28e-06
PMO007152	BCDO1	22.1051	1.3716	0.402808	-3.39153	0.000695041	0.00324387
PMO007153	CENPN	1.78531	-2.02163	0.612026	3.19769	0.00138536	0.00580013
PMO007154	NDR4A	7.37479	2.16992	0.588528	-3.63872	0.000273997	0.00150184
PMO007156	SL9A5	86.8334	3.03536	0.365563	-8.26195	1.43e-16	7.94e-15
PMO007159	CFDP1	54.5706	-5.26903	0.43612	11.6896	1.44e-31	2.81e-29
PMO007163	CMIP	46.4457	0.872236	0.362171	-2.40631	0.0161146	0.0431966
PMO007177	MT1	9.40304	-3.04415	0.568419	5.24901	1.53e-07	2.04e-06
PMO007179	CALB2	1.45403	-2.45028	0.75246	3.12854	0.00175679	0.00702886
PMO007185	PLCG2	11.9796	1.7516	0.441878	-3.92331	8.73e-05	0.000562863
PMO007186	S38A6	41.2617	-2.049	0.315487	6.48904	8.64e-11	2.13e-09
PMO007187	VA0D1	107.142	-0.772315	0.281405	2.74457	0.00605906	0.0195181
PMO007188	CRLD2	11.8307	2.32893	0.441536	-5.17383	2.29e-07	2.95e-06
PMO007190	ORC6	3.1404	1.97973	0.571358	-3.31941	0.000902092	0.00403126
PMO007194	CADH4	5.48474	2.95685	0.579224	-4.754	1.99e-06	2.04e-05
PMO007197	SL9A8	24.0631	-2.87058	0.338154	8.44361	3.08e-17	1.84e-15
PMO007198	RN114	59.4071	-0.776542	0.28034	2.76946	0.00561489	0.0183684
PMO007201	PTN1	38.1568	-1.04433	0.289815	3.60213	0.000315623	0.00169217
PMO007202	PAR6B	7.12054	-1.51413	0.509297	2.96023	0.00307408	0.0112137
PMO007210	CSTF1	131.458	-0.900808	0.252091	3.57359	0.000352115	0.00185468
PMO007214	VAPB	44.4813	-1.55133	0.239039	6.48843	8.67e-11	2.13e-09
PMO007215	PEPL1	128.781	1.15257	0.268169	-4.29693	1.73e-05	0.000138386
PMO007217	TBB6	59.5438	1.21496	0.437672	-2.77534	0.00551445	0.0180566
PMO007236	UCKL1	252.276	-0.968388	0.265889	3.64208	0.000270446	0.00148781
PMO007242	HELZ2	109.436	1.7159	0.562905	-3.05188	0.00227411	0.00872185
PMO007244	S52A3	11.8684	-1.88587	0.40463	4.65422	3.25e-06	3.17e-05
PMO007247	TBC20	40.1626	-0.865643	0.253988	3.40873	0.00065266	0.00309749
PMO007248	HM13	173.693	-0.788812	0.256077	3.08056	0.00206615	0.0080385
PMO007257	FKB1A	5.61893	-4.19993	0.597368	6.66243	2.69e-11	7.25e-10
PMO007260	PCKGC	1579.66	-3.11931	0.536096	5.80984	6.25e-09	1.1e-07
PMO007264	MARE1	43.5334	1.24921	0.259621	-4.80537	1.54e-06	1.62e-05
PMO007267	HCK	2.80159	1.74031	0.660008	-2.58486	0.00974175	0.0287354
PMO007269	RBM38	585.544	1.22502	0.292103	-4.19378	2.74e-05	0.000207269
PMO007278	PHAR3	27.5316	-1.82675	0.522174	3.49623	0.000471889	0.00236259
PMO007282	TPX2B	33.688	-1.40341	0.497835	2.81723	0.00484401	0.0162895
PMO007285	COKA1	7.31617	1.11172	0.428703	-2.5806	0.00986295	0.0290343
PMO007289	DOK5	11.7925	1.62846	0.49547	-3.27286	0.00106464	0.00464714
PMO007295	NSF1C	189.296	-0.710327	0.276783	2.56649	0.0102733	0.0299907
PMO007297	XPO2	165.569	-0.762782	0.221681	3.44118	0.000579189	0.00280376
PMO007299	TIRAP	21.7956	-1.82704	0.354301	5.14951	2.61e-07	3.31e-06
PMO007300	GPT	75.2395	-0.945973	0.340111	2.78219	0.0053994	0.0177684
PMO007303	TPPC4	64.9536	-1.70597	0.28381	6.00877	1.87e-09	3.65e-08
PMO007306	5HT3A	2.49593	-1.70141	0.563115	2.98519	0.00283398	0.010498
PMO007310	SIDT2	727.573	-0.855514	0.313351	2.73007	0.00633201	0.0202386
PMO007311	TAGL	144.569	2.43306	0.394245	-6.16739	6.94e-10	1.45e-08
PMO007324	HINFP	147.074	-1.71104	0.234993	7.28013	3.34e-13	1.19e-11
PMO007329	CBL	65.1846	1.52522	0.554233	-2.75136	0.00593476	0.0191941
PMO007330	RNF26	26.4532	1.66774	0.437786	-3.79477	0.000147778	0.000887679
PMO007333	OAF	243.913	1.01035	0.423444	-2.38644	0.0170126	0.0449511
PMO007335	TM136	23.3831	1.69729	0.559042	-3.03843	0.00237816	0.00906667
PMO007344	THYN1	52.3157	-0.764631	0.296793	2.57697	0.00996715	0.0292429
PMO007345	CNDD3	21.4496	1.01225	0.324159	-3.11769	0.00182275	0.00722784
PMO007347	ATS8	8.54287	1.71898	0.499973	-3.38812	0.000703746	0.00328145
PMO007352	DCPS	40.2187	-2.47328	0.322621	7.65033	2e-14	8.21e-13
PMO007354	FLI1	188.243	1.63247	0.43336	-3.7664	0.000165621	0.000977566
PMO007360	FEZ1	8.38661	2.76349	0.545583	-4.8727	1.1e-06	1.2e-05
PMO007361	ZBT44	83.2914	1.25772	0.401151	-3.13213	0.00173543	0.00695759
PMO007365	TBCEL	16.9375	1.79378	0.502094	-3.54362	0.000394673	0.00203687
PMO007367	CRYAB	10.2945	1.44396	0.511556	-2.8185	0.0048249	0.0162435
PMO007369	GRM1B	30.8487	1.12378	0.393429	-2.85148	0.00435156	0.014966
PMO007372	TECTA	29.0992	1.25661	0.500451	-2.50735	0.0121641	0.0344869
PMO007375	ESAM	247.921	2.79903	0.408124	-6.85354	7.2e-12	2.1e-10
PMO007378	ORN	208.493	2.27492	0.320525	-7.09473	1.3e-12	4.26e-11
PMO007389	ROBO4	39.9882	-1.26606	0.361638	3.49946	0.000466195	0.00233965
PMO007400	IF2G	576.04	-1.84633	0.277182	6.66041	2.73e-11	7.33e-10
PMO007401	SAT1	239.571	-1.66245	0.304388	5.46078	4.74e-08	7.07e-07
PMO007402	PRDX4	63.5176	1.11295	0.445273	-2.49917	0.0124486	0.0351041
PMO007406	CDKL5	2.07089	2.49176	0.659988	-3.65294	0.000259255	0.00143583
PMO007414	WWC3	96.323	1.73954	0.43873	-3.96099	7.46e-05	0.000494653
PMO007420	SYCM	95.7878	-1.77236	0.35721	4.96117	7.01e-07	8.05e-06
PMO007421	PCID2	44.0081	-1.15526	0.341216	3.38574	0.000709876	0.00330393
PMO007437	TM182	776.202	-1.09614	0.449913	2.43534	0.0148777	0.0405
PMO007442	PDCL3	77.2137	1.74579	0.328849	-5.30665	1.12e-07	1.54e-06
PMO007443	IF2P	1013.29	-1.18462	0.394109	3.00518	0.00265422	0.00995118
PMO007449	PDK3	1004.26	-1.33337	0.349926	3.80983	0.000139065	0.00084304
PMO007456	IL1R2	3.49015	-1.81954	0.667737	2.69226	0.00709701	0.0221629
PMO007460	CO4A1	200.004	2.23958	0.330108	-6.77999	1.2e-11	3.38e-10
PMO007461	CLCN4	12.1208	2.66625	0.596361	-4.38536	1.16e-05	9.77e-05
PMO007464	SH3R3	7.1315	3.39885	0.575486	-5.4255	5.78e-08	8.41e-07
PMO007467	ARHL1	4.02351	1.61378	0.598032	-2.65936	0.00782892	0.0240841
PMO007470	SHRM2	6.32337	1.60342	0.532002	-2.97156	0.00296291	0.0108571
PMO007474	MBTP2	7.9436	1.10677	0.42767	-2.57049	0.0101555	0.0297043
PMO007479	BEND2	9.94001	-1.67015	0.419123	3.97183	7.13e-05	0.00047567
PMO007481	M4K4	62.0829	1.7866	0.330414	-5.39666	6.79e-08	9.75e-07
PMO007483	IL18R	1.71386	1.81255	0.71329	-2.49627	0.0125506	0.0352817
PMO007486	SPX2	66.5897	-3.37558	0.35786	9.39712	5.61e-21	4.76e-19
PMO007488	NCAM1	22.8737	-1.60833	0.425127	3.77881	0.000157577	0.000938796
PMO007491	HEM3	76.5567	3.94528	0.332325	-11.725	9.49e-32	1.92e-29
PMO007493	PHLB1	172.285	1.24713	0.308266	-4.04493	5.23e-05	0.000364292
PMO007494	COPD	214.982	-0.61497	0.196531	3.12912	0.00175329	0.00702377
PMO007496	TTC36	0.870425	1.7853	0.735605	-2.43421	0.0149241	0.0405949
PMO007499	UBP28	240.276	-0.84966	0.314938	2.6978	0.00697996	0.0218687
PMO007500	CADM1	149.111	0.664267	0.281924	-2.35605	0.0184702	0.048007
PMO007502	APOA4	2.57895	2.25867	0.656943	-3.45908	0.00054203	0.00265317
PMO007504	SIK3	197.908	1.31515	0.334814	-3.92682	8.61e-05	0.00055574
PMO007512	CD3D	1.32317	1.72316	0.713405	-2.41426	0.015767	0.0424045
PMO007515	CK057	97.4091	-1.18223	0.344487	3.43199	0.000599165	0.00288059
PMO007516	DIXC1	584.515	-7.7487	0.290235	26.0354	1.97e-149	2.07e-145
PMO007518	HSPB2	69.335	1.54171	0.276321	-5.5746	2.48e-08	3.93e-07
PMO007519	SIK2	91.8782	1.47752	0.406424	-3.63218	0.000281035	0.00153244
PMO007526	CLMP	6.93151	2.05514	0.607838	-3.32438	0.000886153	0.00396508
PMO007529	GLBL2	47.8673	-2.36376	0.304446	7.75596	8.77e-15	3.88e-13
PMO007532	ATS15	3.13137	2.22553	0.696276	-3.05274	0.00226765	0.00870657
PMO007536	RUSD4	30.4739	-1.27364	0.361495	3.52274	0.000427109	0.00217776
PMO007543	APLP2	374.445	1.33776	0.296205	-4.516	6.3e-06	5.72e-05
PMO007545	PKNX2	70.2251	0.808133	0.343565	-2.35219	0.0186632	0.0484012
PMO007547	C1QT5	7.68279	2.49928	0.580325	-4.19029	2.79e-05	0.000209548
PMO007555	ZPR1	186.364	-1.63676	0.322842	5.0691	4e-07	4.85e-06
PMO007558	RHG32	5.82123	2.30481	0.554188	-4.00408	6.23e-05	0.000421628
PMO007561	BCL9L	408.312	1.27684	0.319289	-3.99858	6.37e-05	0.000430716
PMO007562	DHSDB	457.79	1.00594	0.331586	-3.03392	0.00241401	0.0091682
PMO007563	MUC18	475.465	1.65291	0.250299	-6.60269	4.04e-11	1.06e-09
PMO007568	PCSK7	104.106	1.01339	0.213107	-4.7542	1.99e-06	2.04e-05
PMO007569	UBE4A	396.609	-0.653554	0.272498	2.39842	0.0164661	0.0439041
PMO007572	FXRD1	145.402	1.22415	0.340233	-3.59705	0.000321843	0.00171758
PMO007581	CC90B	18.959	1.47002	0.371823	-3.93753	8.23e-05	0.00053679
PMO007584	RFC3	48.3462	-0.688067	0.277766	2.47801	0.0132117	0.036783
PMO007585	BRCA2	9.04691	-2.76818	0.418298	4.64511	3.4e-06	3.3e-05
PMO007591		9.38371	1.81997	0.555478	-3.26679	0.00108775	0.00473038
PMO007592	RSLBA	40.939	-4.38282	0.512919	8.39068	4.83e-17	2.84e-15
PMO007594	SHSA2	17.5052	1.37098	0.541457	-2.51903	0.011768	0.0335809
PMO007597	SAP18	441.755	-2.39821	0.327825	7.31386	2.6e-13	9.39e-12
PMO007611	CEP57	9.30546	2.95451	0.543607	-5.20471	1.94e-07	2.55e-06
PMO007612	ENDD1	6.03356	-1.19582	0.500142	2.38174	0.017231	0.0453687
PMO007617	CE295	30.2793	1.67137	0.360184	-4.62823	3.69e-06	3.56e-05
PMO007624	F181B	3.58047	2.63415	0.664593	-3.91141	9.18e-05	0.00058775
PMO007627	SYTL2	29.7574	2.06861	0.418379	-4.91674	8.8e-07	9.84e-06
PMO007634	TNR19	1.67837	1.84975	0.713969	-2.49865	0.0124666	0.0351268
PMO007636	UBP35	0.981677	1.83142	0.70701	-2.55923	0.0104904	0.0305144
PMO007637	PICAL	51.1202	0.974478	0.291048	-3.34579	0.000820483	0.00372188
PMO007638	RAB30	43.5542	-3.21536	0.34099	9.38731	6.16e-21	5.14e-19
PMO007639	NALD2	4.10327	1.97486	0.528282	-3.61686	0.0002982	0.0016135
PMO007640	DYHC2	20.0331	0.753331	0.301036	-2.49928	0.0124445	0.0351022
PMO007642	MED17	92.9743	-1.22455	0.266276	4.59876	4.25e-06	4.02e-05
PMO007644	KLOT	2.94939	3.122	0.701912	-4.43859	9.06e-06	7.84e-05
PMO007646	DDX10	110.062	-1.11841	0.317292	3.52508	0.000423361	0.00216284
PMO007648	RHG42	7.33177	1.48034	0.489627	-2.98275	0.00285673	0.0105489
PMO007651	PDS5B	90.793	0.977992	0.383982	-2.5459	0.0108995	0.0314351
PMO007656	TF3A	38.4857	-1.23489	0.248239	4.97405	6.56e-07	7.58e-06
PMO007662	TM135	25.9251	1.31824	0.401683	-3.27407	0.0010601	0.00463104
PMO007668	SULF2	21.9706	0.963706	0.392432	-2.4513	0.0142341	0.0391368
PMO007672	FA65C	299.459	1.72254	0.496054	-3.4761	0.000508765	0.00252202
PMO007675	ATP9A	8.53207	1.68798	0.454983	-3.67671	0.000236259	0.00132749
PMO007677	ZN217	62.1491	-1.53241	0.365924	4.18471	2.86e-05	0.000214177
PMO007693	CABL2	23.9805	1.56381	0.530847	-2.93604	0.0033243	0.0119199
PMO007695	DIDO1	152.377	1.47671	0.274075	-5.38486	7.25e-08	1.04e-06
PMO007698	NKAI4	18.9593	1.26272	0.425179	-2.96668	0.00301036	0.0110003
PMO007699	ACHA4	6.2315	3.15858	0.622383	-4.86627	1.14e-06	1.24e-05
PMO007702	SRMS	5.3035	2.44963	0.556878	-4.21587	2.49e-05	0.000189886
PMO007708	ZN704	23.065	1.40818	0.425781	-3.29626	0.000979828	0.00433447
PMO007711	TNF6B	5.82743	-2.30746	0.55435	4.11173	3.93e-05	0.000281806
PMO007714	SHPS1	9.43456	0.960619	0.409623	-2.34092	0.0192365	0.0496188
PMO007717	F110A	14.9344	-1.88088	0.483837	3.87492	0.000106661	0.000671755
PMO007719	FOXS1	44.5356	1.71523	0.538318	-3.18397	0.00145271	0.00601016
PMO007720	IRF4	12.0918	2.53662	0.495416	-5.01911	5.19e-07	6.17e-06
PMO007725	GCNT7	2.62799	-1.84518	0.62846	2.88319	0.00393674	0.0137596
PMO007732	PREX1	30.4241	1.00808	0.378595	-2.65795	0.00786171	0.0241567
PMO007737	UB2V1	70.7887	-0.69816	0.220645	3.16477	0.00155205	0.0063506
PMO007745	NOL4L	5.08862	1.31694	0.480188	-2.7119	0.00668984	0.0211614
PMO007754	F131B	14.4532	-4.47383	0.468404	8.89735	5.72e-19	3.96e-17
PMO007759	DCBD2	7.02047	1.26796	0.463853	-2.71001	0.00672813	0.0212251
PMO007760	TTF2	40.6337	-1.63259	0.399138	4.08817	4.35e-05	0.000307916
PMO007771	K1407	9.06189	-1.4925	0.40632	3.66985	0.000242688	0.00135854
PMO007772	CASQ2	488.055	1.88737	0.485762	-3.89071	0.0001	0.000633297
PMO007774	LFA3	33.029	-2.03001	0.446346	4.54114	5.6e-06	5.15e-05
PMO007780	HGD	12.4633	3.34005	0.555232	-5.75219	8.81e-09	1.5e-07
PMO007786	TRI45	14.677	-1.7916	0.327531	5.45913	4.78e-08	7.1e-07
PMO007787	K2018	28.5547	1.24175	0.456531	-2.71127	0.0067026	0.0211709
PMO007790	SPG17	29.1933	4.97724	0.607487	-7.5766	3.55e-14	1.41e-12
PMO007792	MA1A2	37.3167	1.303	0.431022	-3.01579	0.00256307	0.00965761
PMO007796	RM51	361.398	1.24182	0.375089	-3.31105	0.000929471	0.00413605
PMO007798	NOP2	113.977	-1.88316	0.316867	5.94264	2.8e-09	5.33e-08
PMO007810	B4GT4	4.71655	-1.24982	0.452761	2.75164	0.00592978	0.0191838
PMO007812	SIA10	92.1795	-1.01987	0.426853	2.38777	0.0169509	0.0448341
PMO007814	MBOA5	83.2972	-2.22162	0.343991	6.45293	1.1e-10	2.64e-09
PMO007818	RHG31	72.5253	1.74207	0.548759	-3.1744	0.00150148	0.00616765
PMO007819	IGS11	5.37619	2.42235	0.583769	-3.95919	7.52e-05	0.000498079
PMO007827	S2533	108.744	1.05273	0.391014	-2.69257	0.00709036	0.0221487
PMO007828	GDAP2	52.7664	-0.760269	0.30002	2.53509	0.011242	0.0322988
PMO007832	UBP16	74.6529	-0.899063	0.315935	2.84633	0.00442266	0.0151708
PMO007835	PHLB2	75.963	1.30078	0.402145	-3.23118	0.00123279	0.005289
PMO007844	APC10	69.4584	-1.1966	0.343416	3.48514	0.000491878	0.00244753
PMO007861	OPN4	2.38194	2.51638	0.738695	-3.45648	0.00054729	0.00267395
PMO007867	NPNT	2.55203	1.67436	0.618293	-2.62091	0.00876954	0.0264167
PMO007868	SMS2	12.0656	-0.704602	0.449001	-2.42652	0.0152443	0.0413055
PMO007869	CP2U1	18.6086	1.60185	0.441029	-3.60736	0.00030933	0.00166687
PMO007885	UBA6	81.3238	-0.809974	0.281641	2.87636	0.00402295	0.0140098
PMO007906	PDLI5	198.981	1.30526	0.278934	-4.67835	2.89e-06	2.86e-05
PMO007907	OTUD4	88.1015	0.692273	0.250017	-2.76825	0.00563584	0.0184312
PMO007910	ARSJ	5.58453	-1.41597	0.485411	2.90553	0.00366633	0.0129608
PMO007912	GAR1	26.5808	-0.849474	0.314524	2.70183	0.00689593	0.0216635
PMO007913	ZN363	29.7092	1.00259	0.424562	-2.36118	0.0182171	0.0474834
PMO007914	KCC2D	61.0649	0.781984	0.298301	-2.62021	0.00878764	0.0264475
PMO007915	CENPC	4.14688	-1.79916	0.569853	3.13809	0.00170052	0.00683848
PMO007916	AIMP1	87.6536	-0.914111	0.320892	2.84912	0.0043841	0.0150582
PMO007917	SMRCD	35.6196	0.729751	0.311318	-2.34295	0.0191318	0.0494215
PMO007920	CG055	216.46	5.88239	0.466306	-12.237	1.97e-34	5.15e-32
PMO007927	NAGAB	24.1168	1.8461	0.376622	-4.88016	1.06e-06	1.16e-05
PMO007931	NH2L1	44.9152	-1.07585	0.371192	2.89915	0.00374178	0.0131877
PMO007933	PHF5A	14.8112	-1.46168	0.441129	3.3119	0.000926645	0.00412696
PMO007934	TOB2	192.129	1.02119	0.436245	-2.34068	0.0192487	0.0496261
PMO007939	CBX6	12.7106	1.42633	0.521553	-2.71125	0.00670291	0.0211709
PMO007941	DNAL4	3.09737	-1.67688	0.635995	2.61632	0.00888824	0.0266799
PMO007943	JOS1	15.4453	1.36624	0.337809	-4.0295	5.59e-05	0.00038598
PMO007945	DDX17	273.715	1.16054	0.368311	-3.15062	0.00162923	0.00660731
PMO007958	EIF3D	1079.05	-1.10425	0.292355	3.77689	0.000158797	0.000944704
PMO007959	FXRD2	16.8529	0.84409	0.327318	-2.57403	0.0100523	0.0294599
PMO007960	THIOM	161.854	0.850087	0.309896	-2.74316	0.00608514	0.0195901
PMO007962	MYG	14530.3	1.89647	0.43631	-4.35019	1.36e-05	0.000112539
PMO007963	RTCB	169.871	-1.31341	0.255589	5.13857	2.77e-07	3.49e-06
PMO007965	NUAK1	134.834	1.71902	0.523106	-3.28803	0.00100891	0.00444443
PMO007967	PRDM4	34.7763	1.06342	0.244814	-4.34008	1.42e-05	0.000117348
PMO007970	THTR	164.916	0.685949	0.290347	-2.36227	0.0181636	0.0473858
PMO007976	SUN2	75.6692	1.48297	0.444853	-3.32992	0.000868717	0.00390033
PMO007978	CP2D4	79.7517	5.33315	0.39536	-12.7734	2.31e-37	7.84e-35
PMO007984	CKAP4	17.5206	1.15397	0.436994	-2.63413	0.00843526	0.0256124
PMO007992	ANR54	39.6753	1.40327	0.497491	-2.81825	0.00482861	0.0162508
PMO007997	MKL1	71.5771	0.932518	0.285672	-3.26255	0.00110415	0.00479378
PMO008005	TIM8A	14.9247	1.19279	0.459065	-2.59517	0.00945432	0.028046
PMO008006	TAF7	119.186	-0.862966	0.287884	2.99805	0.00271714	0.0101437
PMO008007	F8I2	26.6582	-1.3153	0.470347	2.7926	0.00522856	0.0173636
PMO008010	SNX12	192.574	-0.738185	0.274503	2.68931	0.00716006	0.0223447
PMO008013	UIF	831.287	-1.55079	0.299861	5.17126	2.33e-07	2.99e-06
PMO008020	HMGB3	56.2179	-0.791761	0.298741	2.65134	0.00801721	0.0245556
PMO008030	SMCA1	111.011	0.833077	0.318905	-2.61158	0.00901242	0.0269681
PMO008032	THOC2	152.34	0.984404	0.284682	-3.45766	0.000544893	0.00266523
PMO008033	C1GLC	50.1944	-1.12441	0.269315	4.17537	2.98e-05	0.000221735
PMO008037	NKAP	27.2211	-1.21468	0.362595	3.35202	0.000802234	0.00365011
PMO008039	2019-09-06	89.0995	-0.682491	0.189648	3.59913	0.000319286	0.00170653
PMO008041	K121L	4.03179	1.32576	0.519806	-2.51561	0.0118825	0.0338619
PMO008045	H6ST2	4.02233	1.62911	0.574024	-2.79575	0.0051779	0.0172117
PMO008048	FRMD7	3.0053	-1.53934	0.568653	2.68749	0.00719913	0.0224474
PMO008052	ACSL4	95.1258	-0.675646	0.266255	2.53755	0.011163	0.0320974
PMO008055	DKC1	111.259	-1.0767	0.257086	4.18848	2.81e-05	0.000210954
PMO008057	SESN3	18.4251	-1.56747	0.426683	3.66872	0.000243772	0.00136243
PMO008064	NKRF	471.498	-1.44195	0.274273	5.25705	1.46e-07	1.97e-06
PMO008065	NPAS2	5.22084	1.15507	0.47827	-2.39899	0.0164404	0.0438467
PMO008076	EMRE	100.249	-4.41622	0.406232	10.7924	3.74e-27	4.86e-25
PMO008077	SESQ2	35.5691	1.58256	0.461714	-3.41696	0.000633257	0.00301829
PMO008078	WBP2	199.167	2.08607	0.303142	-6.87702	6.11e-12	1.8e-10
PMO008084	LMBL2	8.68422	1.21712	0.403801	-3.0035	0.00266898	0.00999584
PMO008093	MID51	84.8282	1.80392	0.522106	-3.4528	0.000554807	0.00270189
PMO008099	RPAB2	162.132	-1.11712	0.328381	3.40177	0.000669504	0.00315534
PMO008101	KBL	513.014	0.704355	0.273049	-2.57958	0.00989206	0.0290954
PMO008102	H5	2696.05	2.09279	0.454172	-4.61298	3.97e-06	3.79e-05
PMO008103	TARA	184.668	2.50229	0.292761	-8.53783	1.37e-17	8.37e-16
PMO008105	BORG5	31.065	1.53166	0.402764	-3.79378	0.000148369	0.000890216
PMO008108	RHES	4.33061	1.82665	0.544272	-3.28129	0.00103334	0.00453055
PMO008110	TOM1	532.193	2.79634	0.383008	-7.30246	2.83e-13	1.02e-11
PMO008113	TIMP3	51.1737	1.54552	0.38069	-4.05205	5.08e-05	0.000354795
PMO008122	3BP1	3.9423	-2.35707	0.554286	4.16519	3.11e-05	0.000230866
PMO008123	MGAT3	25.4217	1.70845	0.547192	-3.10877	0.00187869	0.00741888
PMO008124	SGSM3	272.232	2.53004	0.274067	-9.22602	2.81e-20	2.21e-18
PMO008126	SRBP2	106.71	1.36166	0.433148	-3.14178	0.00167923	0.00676318
[truncated: 2,059 more rows]

## Sheet: Common.DEGs in highland birds
Gene_id	Gene_name	Pa.mo(H) VS. Pa.mo(L).log2FoldChange	Pa.mo(L) VS. Py.ru.log2FoldChange	Pa.mo(L) VS. On.ta.log2FoldChange
PMO009988	KY	3.28568	2.45677	2.82865
PMO002025	FBX40	2.8796	2.7156	2.61168
PMO000797	KBTBD	2.73834	2.25588	2.35296
PMO003402	NTM1B	2.72414	1.67604	2.69117
PMO001992	CLCN1	2.45868	1.74634	2.81586
PMO002439	FA78A	2.44206	2.6972	2.31316
PMO007461	CLCN4	2.43055	2.53267	2.66625
PMO000331	SBK1	2.36297	1.96581	0.989478
PMO006336	SYNPO	2.29912	2.61985	3.95321
PMO009488	PRR33	2.28803	2.72944	3.16387
PMO009541	SBK2	2.2638	1.71505	1.78653
PMO000707	LMOD3	2.22887	1.2859	2.09564
PMO007819	IGS11	2.21675	2.24326	2.42235
PMO006424	MYOTI	2.19223	1.84097	3.03983
PMO016387	KLH33	2.18901	2.17848	2.39604
PMO009809	SRPK2	2.12951	0.931003	2.14387
PMO004741	PALMD	2.1159	2.26966	2.87953
PMO000668	PZRN3	2.10855	2.20805	2.4435
PMO000636	KBTBC	2.08018	2.4895	3.45007
PMO006436	MYOZ3	2.06567	2.24184	2.06201
PMO001352	BCL6	2.0319	3.25571	3.3094
PMO009231	CPZIP	1.99803	1.45166	2.05905
PMO015886	AQP4	1.99603	1.96148	3.23703
PMO013752	ASPH	1.99466	2.3264	1.06688
PMO003475	G3ST2	1.99344	2.16949	1.92709
PMO001668	PPAC3	1.98244	1.60567	1.97492
PMO013759	PDP1	1.96534	2.55125	2.35082
PMO012440	MADL2	1.86225	1.95006	3.33594
PMO004871	ZN536	1.85274	2.54349	3.55341
PMO000138	S14L5	1.83646	1.07733	1.85899
PMO012085	AKAP6	1.81032	1.60396	1.80264
PMO011904	ESR1	1.7954	2.68089	2.98653
PMO014265	SMRD3	1.78887	1.16039	1.75392
PMO013505	BEST3	1.77382	2.20509	1.83577
PMO015964	SCN2A	1.77273	1.41907	2.04112
PMO014861	CERS2	1.77073	2.01819	2.18776
PMO002722	ERR3	1.74929	1.14052	1.58363
PMO006689	ZN106	1.7419	1.7388	2.03757
PMO000338	NA	1.73611	1.61386	1.6755
PMO009020	PAQR9	1.73299	2.27638	3.14298
PMO013449	MTUS1	1.69681	1.80344	4.05987
PMO009451	SEM3C	1.68011	1.29259	1.91832
PMO015970	UPP2	1.67973	-4.16653	-4.7886
PMO002851	GP174	1.6785	2.93375	3.85202
PMO000211	HBA	1.6707	2.67809	2.50854
PMO000047	KCJ12	1.62933	2.20385	2.89167
PMO005879	DPS1	1.61126	1.39344	1.35032
PMO012023	EPN3	1.59952	1.59116	1.61944
PMO010439	MET7A	1.59705	1.64036	1.6383
PMO014310	ZBT47	1.59337	1.42014	1.81748
PMO012748	RAD54	1.59215	1.79164	1.56275
PMO010638	MEF2C	1.58448	3.97186	4.84856
PMO011384	RFTN2	1.576	1.90746	2.0178
PMO001323	TNIK	1.57114	1.51526	1.95107
PMO007040	DYST	1.56489	1.09921	1.89639
PMO012793	AAPK2	1.56359	1.37815	2.79972
PMO006850	EXOC6	1.54211	1.64931	2.38237
PMO016065	NPFF1	1.53659	2.36294	3.37212
PMO006857	GPAT1	1.53051	1.31718	1.55226
PMO006936	CCD50	1.52495	1.58864	3.15543
PMO003462	KLH24	1.51215	2.17388	2.89717
PMO003931	MPSF	1.50923	1.99276	2.19122
PMO006057	GTR12	1.50731	2.83546	1.80819
PMO002150	CP46A	1.50279	1.75034	1.11795
PMO003879	DEN1B	1.48444	1.68713	1.71165
PMO011584	PLCL1	1.48332	1.45267	2.40369
PMO000123	RFIP3	1.48034	1.74307	1.34203
PMO006197	SYNEM	1.48025	1.95729	1.92862
PMO008917	ASB10	1.46855	1.21134	1.59516
PMO000354	ELFN1	1.45029	2.38644	2.18549
PMO015162	GDF8	1.43709	1.98577	2.30575
PMO004834	MYH4	1.43178	1.48157	4.44336
PMO009718	SERPH	1.43018	1.38605	2.42972
PMO006289	RAM	1.42519	3.26535	3.47797
PMO011608	TITIN	1.42227	1.56582	1.90994
PMO002289	ASB2	1.42096	1.74193	2.62345
PMO007518	HSPB2	1.41235	1.06395	1.54171
PMO014434	TETN	1.40681	1.33501	1.95655
PMO002235	FLVC1	1.40367	2.16417	2.49974
PMO014684	NUDT3	1.39582	1.46272	1.7547
PMO000107	HBAD	1.38969	0.922728	2.11913
PMO000125	PITC1	1.385	1.99099	2.05733
PMO005338	M21D2	1.35538	0.992612	1.52232
PMO001255	AACS	1.35518	1.95102	2.22708
PMO006078	K0408	1.35279	1.78146	2.02542
PMO003614	LUZP2	1.34872	-1.461	-1.13493
PMO008108	RHES	1.34802	1.56597	1.82665
PMO002000	GTPB8	1.34666	1.10386	2.95572
PMO007962	MYG	1.33435	1.93546	1.89647
PMO009584	MMRN2	1.32731	1.69338	1.87744
PMO001502	P85A	1.32671	1.37911	1.60248
PMO001060	HECD2	1.31667	3.21938	3.0097
PMO003450	RORB	1.3107	2.4449	1.66818
PMO012254	PEDF	1.30656	1.2278	2.13465
PMO010104	PRELP	1.29071	1.29723	2.68072
PMO002436	FNBP1	1.28972	1.0728	1.50548
PMO006600	SEM3D	1.27185	1.71799	2.13004
PMO014714	ZBT38	1.27055	0.808668	1.04763
PMO007044	KLH31	1.26906	1.93647	1.94376
PMO009362	RM13	1.2529	5.0192	5.00512
PMO007662	TM135	1.25043	1.46803	1.31824
PMO014718	MOGT1	1.25021	2.07228	1.08935
PMO014021	ATS20	1.2501	1.8383	2.3742
PMO012671	NETO2	1.24897	2.37554	6.1847
PMO012568	CLU	1.2431	1.18804	1.07947
PMO007059	LAMA4	1.24095	1.40286	2.08676
PMO004328	MAOM	1.23979	1.41843	1.98138
PMO000426	FYCO1	1.23949	1.24091	1.21336
PMO010056	SIA8E	1.23254	1.98208	2.20083
PMO013063	CECR5	1.23105	2.39563	2.1945
PMO010453	ADPRM	1.22359	1.00725	0.644013
PMO011472	STEA3	1.20529	1.80004	1.7653
PMO007978	CP2D4	1.19909	5.71877	5.33315
PMO005940	LAR4B	1.19682	1.56245	2.04218
PMO008680	CD38	1.19424	1.9212	1.49783
PMO004267	JPH2	1.19207	2.15964	2.43508
PMO008439	PPR3A	1.18677	1.37724	1.23777
PMO010315	BROMI	1.17457	1.38032	1.95724
PMO002493	LRC30	1.16904	3.03549	3.50357
PMO007702	SRMS	1.15932	1.39858	2.44963
PMO001783	PITM2	1.15407	1.95743	2.39916
PMO008454	TB22A	1.14036	1.6543	1.6515
PMO007827	S2533	1.13729	1.13179	1.05273
PMO002299	PTN21	1.13278	1.41999	1.97132
PMO007651	PDS5B	1.13169	0.975577	0.977992
PMO001428	MKNK1	1.12695	1.5923	1.06824
PMO008404	IP3KB	1.12532	1.87477	2.6014
PMO004408	ENPP4	1.12382	1.266	1.093
PMO008877	KCNT1	1.12338	2.96816	3.8949
PMO015610	NUD17	1.11694	4.15992	1.74158
PMO005287	NAL12	1.11361	2.11284	2.19156
PMO007675	ATP9A	1.11067	2.01311	1.68798
PMO001024	SPRC	1.10763	1.63176	1.5568
PMO007107	F192A	1.10625	2.77812	3.4767
PMO004670	HEMGN	1.10548	1.23415	1.6484
PMO015678	HBB	1.10184	2.08411	2.08708
PMO004555	CHD6	1.10024	1.49318	1.82082
PMO010883	PLCE	1.09263	0.955868	0.923415
PMO011387	TRAK2	1.0892	1.78045	1.39954
PMO015491	NFL	1.08904	2.43435	2.62423
PMO015031	ANO8	1.08862	1.23765	1.05178
PMO016353	CD029	1.07523	1.79923	2.23336
PMO000081	TMC7	1.07234	1.53086	1.38713
PMO011432	MYO10	1.07233	2.01221	1.85221
PMO004729	WNK2	1.07122	1.45654	1.69338
PMO002039	CSTN3	1.06916	1.71919	1.01715
PMO014235	COX5B	1.06898	10.4491	8.01075
PMO000923	FA13B	1.06599	1.53596	1.81204
PMO006206	RASLC	1.05881	2.07876	1.36543
PMO006447	S36A1	1.05659	1.25719	1.72152
PMO014616	ZMIZ2	1.05518	1.52279	2.51169
PMO001141	SLK	1.05514	1.00973	0.920487
PMO001232	PPTC7	1.05493	1.31189	1.45207
PMO011998	TIMP2	1.05322	1.09522	0.866352
PMO004015	PARVB	1.05114	1.33379	2.77291
PMO006913	NDUB5	1.04887	1.08933	1.70815
PMO012111	TMM62	1.04716	1.6266	1.20653
PMO003873	AMYP	1.04316	2.16814	1.82945
PMO014000	PRIC1	1.04264	1.34486	1.75528
PMO012086	AP4S1	1.04181	1.80571	1.83937
PMO014629	ANXA4	1.03726	2.28248	2.67345
PMO002613	AFF1	1.02132	1.22594	1.24692
PMO011951	NMDE3	1.02025	-5.77566	-2.68087
PMO015461	AA1R	1.00965	1.43202	2.21556
PMO002720	EMAL4	0.996662	0.99003	1.3071
PMO012226	P2RX1	0.996004	1.49	1.55568
PMO000300	NDE1	0.984227	0.794915	1.29318
PMO012535	MY18A	0.980911	1.24863	1.75789
PMO008748	MAP7	0.966931	1.36861	0.956075
PMO001201	COMT	0.961826	0.731552	0.97324
PMO010528	MCAF1	0.943412	0.746034	0.751477
PMO012563	AKAP1	0.943	1.17733	1.16714
PMO002307	DAPLE	0.941007	0.970907	1.50944
PMO013854	DOPD	0.932676	1.87839	1.93222
PMO012571	RNFT1	0.927833	1.45594	1.8217
PMO008235	BT1A1	0.921621	2.26652	2.09684
PMO002209	SRBD1	0.921237	0.995037	0.91957
PMO008652	ARHG9	0.917147	1.24694	1.53887
PMO000693	ACOX2	0.91613	1.75004	1.28591
PMO006282	VIP1	0.904968	1.47601	1.85686
PMO015831	MYOME	0.895301	0.929777	1.29347
PMO011867	TXLNB	0.891689	2.20943	1.96499
PMO007563	MUC18	0.89064	0.856273	1.65291
PMO013973	GCP6	0.882723	1.16935	1.07131
PMO010551	FSD1L	0.878819	-1.33097	-1.32446
PMO001282	TNG2	0.843751	0.978132	0.743512
PMO001246	SETD8	0.842497	1.17766	1.31987
PMO002323	FA8	0.827014	1.00502	2.4125
PMO000771	ZNT4	0.816993	1.37131	1.34762
PMO009651	TTLL7	0.796151	1.61768	1.24335
PMO007131	OSGI1	0.791514	1.75488	1.09223
PMO014347	TSAP1	0.780047	1.11097	0.959755
PMO006193	KLH25	0.766115	1.5796	0.92632
PMO002835	ARHG6	0.755487	2.39268	2.21742
PMO012758	NLTP	0.755292	1.01311	1.04556
PMO012301	SGSM2	0.736968	-1.68567	-1.14437
PMO001243	AT2A2	0.680983	1.92972	1.52693
PMO001755	SCRB1	0.679441	-0.931055	-1.72174
PMO002607	NFYC	0.669959	0.705741	1.33912
PMO005781	3HIDH	0.661651	1.06344	1.15202
PMO015464	DRAM2	0.641822	1.06167	0.922527
PMO006759	ACTA	0.631833	1.96167	1.31714
PMO012131	PEX16	-0.635709	-3.21984	-0.949661
PMO000319	CLCN7	-0.652994	-0.822483	-0.846266
PMO006778	P4K2A	-0.659696	-0.802032	-1.00821
PMO007642	MED17	-0.659734	-0.755498	-1.22455
PMO002643	T2EB	-0.69491	-0.980533	-0.798015
PMO006480	UBP4	-0.697453	-1.1445	-1.06349
PMO008867	CUL1	-0.697509	-0.62207	-0.960318
PMO014733	LSG1	-0.701995	-0.912313	-0.921362
PMO015627	MIC1	-0.704063	-0.824638	-0.596764
PMO009268	TEX10	-0.717813	-0.699835	-0.798334
PMO013831	PESC	-0.722897	-1.03992	-0.943766
PMO002054	UBP5	-0.723988	-1.01641	-0.697605
PMO001180	NFKB2	-0.724095	-0.881917	-1.03991
PMO007569	UBE4A	-0.72647	-0.628011	-0.653554
PMO006330	SQSTM	-0.727439	-1.57086	-1.8001
PMO012842	M3K15	-0.728207	-1.04541	-1.54656
PMO007247	TBC20	-0.730547	3.07979	-0.865643
PMO003693	LIPB1	-0.732256	0.68128	0.745795
PMO004121	U5S1	-0.736813	-0.753782	-0.92554
PMO007963	RTCB	-0.741914	-0.983354	-1.31341
PMO009108	RAB1A	-0.743728	-0.753181	-1.01987
PMO014750	SP130	-0.753804	-1.7575	-1.53443
PMO009136	IF4A3	-0.761659	-1.26109	-1.25794
PMO009858	ANX11	-0.774569	-0.902263	-1.04317
PMO008552	CHERP	-0.781275	-1.18112	-2.64965
PMO002421	CDK9	-0.781719	-1.09666	-1.45795
PMO010049	THIM	-0.785177	-1.04032	-1.20687
PMO001911	HNRPK	-0.787306	-0.82544	-0.926349
PMO006468	GL8D1	-0.787547	-1.2369	-1.04683
PMO012899	MFSD9	-0.791441	-2.28301	-2.21707
PMO007656	TF3A	-0.792358	-1.78813	-1.23489
PMO008881	RAB14	-0.812119	-1.49791	-2.32457
PMO009945	TRM5	-0.813656	-1.29007	-1.55773
PMO012634	RBP10	-0.818963	-0.842456	-1.10537
PMO004845	PRS10	-0.825032	-1.28782	-1.86161
PMO011843	GINM1	-0.829157	-1.29242	-2.54747
PMO016091	NRBP	-0.833316	-1.52303	-1.57253
PMO000469	MIO	-0.843139	-0.808189	-1.19748
PMO003527	CREG1	-0.853158	2.80906	2.6118
PMO011644	LFG3	-0.854162	-2.42998	-1.94675
PMO014111	RN19B	-0.864481	-0.756493	-1.09536
PMO007132	S7A6O	-0.866558	-1.12371	-0.783594
PMO014533	PNO1	-0.871683	-0.942673	-1.28897
PMO014266	CHPF2	-0.882117	-1.13368	-1.51055
PMO003817	TRM1L	-0.882687	-1.18941	-1.65913
PMO012204	PRS6A	-0.886692	-1.47044	-1.261
PMO000673	RAD18	-0.886905	-1.26897	-1.34438
PMO015907	SASB	-0.889337	-2.56597	-1.55392
PMO003336	ZN830	-0.890775	-1.59335	-1.43186
PMO007912	GAR1	-0.895564	-2.83195	-0.849474
PMO012655	CPSF5	-0.895776	-4.04035	-2.27576
PMO000806	TIPIN	-0.902886	-1.27109	-1.71747
PMO007186	S38A6	-0.904559	-1.89755	-2.049
PMO004008	NEUA	-0.905502	-2.44524	-2.20109
PMO010218	CB042	-0.90666	-0.833612	-1.61497
PMO014040	RXRA	-0.908965	-1.13717	-1.62094
PMO002453	UCK1	-0.909234	-1.10892	-1.75829
PMO011682	NIF3L	-0.915298	-2.27538	-2.23385
PMO009222	PACE1	-0.915543	-1.45176	-1.37234
PMO000432	METL6	-0.924499	-1.9339	-2.27999
PMO011992	NPL4	-0.929131	-0.931884	-1.19744
PMO010672	IKZF5	-0.929253	-1.13172	-1.42326
PMO002169	PURA2	-0.93057	-1.60378	-2.0387
PMO013203	CAND1	-0.935312	-0.71824	-1.03427
PMO012940	CHPT1	-0.937318	-1.60567	-0.856016
PMO012359	NUP88	-0.940848	-1.32494	-2.05255
PMO003788	KCMF1	-0.940978	-2.74934	-2.09764
PMO000114	UBAD1	-0.943315	-1.15783	-1.24651
PMO010135	THIO	-0.943602	-0.861915	-6.18146
PMO009937	SIX1B	-0.943723	-1.33757	-1.23746
PMO004529	PRR5L	-0.946091	-1.91281	-2.04245
PMO016019	BAP29	-0.947591	-1.19804	-1.84111
PMO006079	NUP43	-0.947636	-1.04252	-0.680215
PMO005393	MLP3A	-0.948248	-3.39838	-2.28917
PMO003665	SOSB2	-0.959185	-1.37933	-1.21489
PMO011899	COPB	-0.959436	-0.945924	-1.47971
PMO000674	SEC13	-0.959816	-0.707337	-1.25379
PMO002411	LRSM1	-0.960255	-2.86525	-2.26375
PMO015440	S38A6	-0.960714	-1.31601	-2.34221
PMO010286	KAD6	-0.960784	-2.45232	-3.33205
PMO003026	SMOX	-0.961302	-0.941628	-0.918354
PMO011729	UBXN4	-0.961597	-1.63067	-1.50389
PMO012687	BBS2	-0.964095	-0.957089	-0.967294
PMO013846	SNF5	-0.964108	-1.88959	-1.48303
PMO000381	GID4	-0.964393	-0.864342	-1.22889
PMO015603	PRPF3	-0.975028	-1.37742	-1.65287
PMO012888	CDC16	-0.981067	-1.64906	-1.795
PMO008149	RAB2A	-0.983974	-1.10085	-2.60404
PMO014317	NCDN	-0.985719	-1.33792	-1.56895
PMO008750	MSPD1	-0.985803	-2.1697	-1.18175
PMO005012	NOL6	-0.990765	-0.830035	-1.13064
PMO011590	BZW1	-0.993232	-1.28661	-1.31922
PMO013993	IFRD1	-0.996401	-0.829887	-1.32747
PMO003628	NAT10	-0.998145	-1.4181	-0.85279
PMO012175	RAPSN	-1.00007	-1.45352	-2.62839
PMO012276	NLE1	-1.00266	-0.985944	-1.95273
PMO009267	PDCD6	-1.0042	-1.93249	-2.14532
PMO002706	S35B2	-1.00741	-1.27335	-1.14517
PMO016431	CAN1	-1.00783	-2.91301	-1.61011
PMO008055	DKC1	-1.00814	-1.20521	-1.0767
PMO012557	BCAS3	-1.01076	-1.23704	-1.12916
PMO002937	UGDH	-1.01304	-1.25169	-1.07173
PMO004295	SMBP2	-1.01734	-1.28279	-2.37139
PMO007352	DCPS	-1.01924	-2.84979	-2.47328
PMO011864	PDCD2	-1.02235	1.10603	1.15039
PMO012629	GFOD2	-1.02527	-1.85392	-1.01765
PMO000782	TICRR	-1.02919	-1.37516	-1.25869
PMO005990	TSNAX	-1.03164	-1.4407	-1.29905
PMO005125	TRI35	-1.0334	-3.35982	-3.73625
PMO014338	SNR40	-1.03982	-5.833	-1.33136
PMO009046	WDFY1	-1.04509	-1.06847	-0.788969
PMO015478	KLHL8	-1.05574	-1.73789	-0.898197
PMO004391	PRP18	-1.05802	-1.77272	-1.71705
PMO013113	APH1A	-1.06125	-1.24953	-1.36574
PMO000395	BRAT1	-1.06127	-1.14449	-0.99131
PMO017009	ELP4	-1.07193	-2.27621	-1.41513
PMO004167	TRM44	-1.07483	-1.73554	-2.43777
PMO013616	UBE4B	-1.08086	-1.71951	-1.34075
PMO003960	FRIH	-1.08174	-0.907115	-1.05382
PMO001003	KC1A	-1.08556	-0.97064	-1.16312
PMO003279	CAF1B	-1.08995	-1.51853	-1.28824
PMO010678	ZCHC7	-1.09803	-1.75676	-1.90272
PMO003132	PSB2	-1.09906	-1.84866	-1.13385
PMO001345	PSMD1	-1.10157	-0.841686	-1.3556
PMO002018	CTC1	-1.10507	-0.906479	-2.03284
PMO000656	PSMD6	-1.10768	-1.78798	-2.31499
PMO007814	MBOA5	-1.10842	-1.53181	-2.22162
PMO010256	M3KCL	-1.11163	-2.13857	-2.94074
PMO006925	IF4E2	-1.11208	-0.795457	-1.45137
PMO000911	KCT2	-1.1225	0.910522	1.49948
PMO016054	H101	-1.12663	-2.58836	-3.38576
PMO008122	3BP1	-1.12673	-1.80021	-2.35707
PMO002830	HEPH	-1.12711	-2.49931	-2.02349
PMO010238	SAS10	-1.12792	-0.989698	-1.03882
PMO001334	PSMD2	-1.13731	-1.72222	-1.85424
PMO002318	NUP62	-1.13753	-1.95156	-0.787067
PMO006580	HEM1	-1.1473	-1.19672	-1.91025
PMO007717	F110A	-1.14732	-1.32669	-1.88088
PMO003184	RF12A	-1.14858	-2.26529	-2.50686
PMO007201	PTN1	-1.15707	-1.16401	-1.04433
PMO009121	VPS54	-1.16851	-1.58345	-1.73469
PMO011745	CTR9	-1.17995	-1.23819	-1.48464
PMO006287	CHD2	-1.1814	-1.49215	-1.23116
PMO003563	CADH1	-1.18916	-7.16868	-6.00073
PMO010426	TERA	-1.19364	-1.30268	-1.7261
PMO010242	NUP54	-1.19482	-1.41334	-1.90262
PMO013213	TBC15	-1.19937	-0.65345	-1.21163
PMO003671	WDR75	-1.20303	-1.44796	-2.17763
PMO014250	AP3M2	-1.21169	-1.23407	-1.60103
PMO008410	WDR26	-1.21835	-1.13003	-1.29791
PMO012099	ARGI2	-1.21962	-1.79106	1.48604
PMO004843	FXL17	-1.2299	-5.09227	-1.45401
PMO008232	RCL1	-1.23553	-1.49047	-3.09165
PMO012930	K0930	-1.26879	-1.63651	-1.84434
PMO010878	S35F6	-1.27197	-1.54642	-1.61275
PMO009748	KCD20	-1.27621	-2.18454	-1.9992
PMO007052	FBXL4	-1.28786	-1.92374	-2.32262
PMO009582	CDK1	-1.28958	-1.9294	-1.5884
PMO000270	WIPI2	-1.29113	-1.61932	-2.08802
PMO006385	ADA1B	-1.29326	-3.00652	-1.49751
PMO012472	S39AB	-1.29444	-1.25942	-1.12355
PMO003852	TRIB1	-1.30437	-1.34557	-1.46715
PMO007754	F131B	-1.31535	-4.54616	-4.47383
PMO015879	NPC1	-1.32771	-0.712244	-0.919268
PMO001789	SRR1L	-1.33299	-1.26338	-2.343
PMO013641	WRP73	-1.33772	-1.40664	-2.35823
PMO010556	RD23B	-1.35144	-2.55672	-2.87452
PMO006640	SPTN5	-1.36032	-1.45956	-2.08856
PMO014268	B3A2	-1.36822	-1.43996	-1.74038
PMO007638	RAB30	-1.37287	-0.892441	-3.21536
PMO003071	PSMD3	-1.37606	-0.897788	-2.37241
PMO000383	ERF3A	-1.37743	-1.63458	-2.13882
PMO013971	PIM3	-1.389	-1.26528	-1.67318
PMO001626	TO4AA	-1.40377	-1.51496	-1.31085
PMO005687	SSRB	-1.41858	-1.19155	-1.22325
PMO010934	GLMPA	-1.42628	-3.04939	-2.61914
PMO001336	PHF13	-1.4272	-1.36624	-3.43924
PMO007711	TNF6B	-1.43662	-1.23898	-2.30746
PMO014986	FBX6	-1.44651	-1.43115	-1.76381
PMO006501	TMM43	-1.44992	-1.24073	-0.806661
PMO000701	KPCD	-1.46146	-1.21429	-1.93461
PMO012425	CHMP6	-1.48966	-1.25503	-2.03638
PMO004476	CATB	-1.52808	-1.16673	-1.73112
PMO013172	BRX1	-1.5547	-2.49763	-1.47624
PMO007592	RSLBA	-1.55782	-3.14474	-4.38282
PMO007177	MT1	-1.56386	-1.94053	-3.04415
PMO002792	STA5B	-1.57046	-1.46312	-1.23937
PMO016522	DGAT2	-1.57539	-6.10813	-4.94018
PMO005203	ZN628	-1.57842	-2.1558	-1.6947
PMO009365	SNTB1	-1.59198	-2.24196	-1.62111
PMO013733	SNX16	-1.59972	-2.03362	-2.0991
PMO003922	DCOR	-1.60454	-2.7017	-3.68585
PMO015854	TSCOT	-1.63848	-2.5489	-3.15733
PMO002517	PSMG2	-1.63946	-1.62737	-2.44692
PMO000348	GP146	-1.64051	-1.30808	-1.89545
PMO009892	BNIP3	-1.6487	-2.8594	-3.32045
PMO011500	ALS2	-1.65074	-1.76935	-2.27624
PMO015956	BAHD1	-1.65275	-0.989094	-1.25087
PMO013259	CRADD	-1.65761	-1.45718	-2.83241
PMO005286	TALDO	-1.67285	-3.17778	-2.80494
PMO013481	BTG1	-1.70629	-1.85403	-2.32763
PMO009016	TRFM	-1.7341	1.40777	-3.57363
PMO012877	VEGFD	-1.73616	-2.27324	-2.35745
PMO004324	LIPE	-1.75288	-3.36587	-2.80074
PMO010121	LAAT1	-1.77881	-1.513	-1.84972
PMO002512	MLRN	-1.79707	-2.63159	-2.86659
PMO009199	GLNA	-1.85118	-2.48083	-2.4914
PMO001829	P20D2	-1.8749	-1.4713	-1.21972
PMO013921	PGDH	-1.90468	-2.90106	-2.4676
PMO008607	UPP	-1.91934	-4.78694	-4.27444
PMO006035	VNN2	-1.93623	-2.20626	-2.19386
PMO010976	FRIH	-1.9581	-2.6555	-2.42667
PMO004860	EAA2	-1.99188	-4.07164	-3.22994
PMO012549	CTNS	-2.01705	-2.69505	-4.16977
PMO006795	5NTC	-2.04394	-1.89166	-2.14025
PMO013226	SOCS2	-2.10556	-1.89165	-2.82104
PMO002303	LGMN	-2.29376	-2.24017	-2.70834
PMO003293	T11L1	-3.15082	-3.54164	-2.6113
